# Supplementary material for: Distinct chromatin functional states correlate with HIV latency reactivation in infected primary CD4+ T cells
Source: eLife journal article supplement (doi:10.7554/elife.34655), 2018-04-30
Supplement: supp [file elife-34655-supp-v1.zip]

Archive with 12 entries (12 files):
- elife_poa_e34655_Figure_1_source_data_1.xlsx
- elife_poa_e34655_Figure_3_source_data_1.xlsx
- elife_poa_e34655_Figure_2_source_data_1.xlsx
- elife_poa_e34655_Figure_5_source_data_1.xlsx
- elife_poa_e34655_Figure_4_source_data_1.xlsx
- elife_poa_e34655_Figure_6_source_data_1.xlsx
- elife_poa_e34655_Figure_5_source_data_2.xlsx
- elife_poa_e34655_Figure_1_figure_supplement_1.pdf
- elife_poa_e34655_Source_data_1.xlsx
- elife_poa_e34655_Figure_4_figure_supplement_1.pdf
- elife_poa_e34655_Transparent_Reporting_File.pdf
- elife_poa_e34655_Figure_7_source_data_1.xlsx
