# Supplementary material for: Distinct chromatin functional states correlate with HIV latency reactivation in infected primary CD4+ T cells
Source: eLife journal article supplement (doi:10.7554/elife.34655), 2018-04-30
Supplement: supp [file elife-34655-supp-v1.zip › elife_poa_e34655_Figure_1_source_data_1.xlsx]

## Sheet: Sheet1
	US (Gag)		SS (Env)		MS (Tat, Rev)
Uninfected	1	1	1	1	1	1
Double Negative	1.11998	3.53082	1.10916	0.49216	1.03	1.70293
Latent	44.5322	41.4475	58.3403	58.7681	16.8609	14.7436
Productive	1125.65	563.149	1320.72	844.136	624.55	563.149
