# Supplementary material for: Distinct chromatin functional states correlate with HIV latency reactivation in infected primary CD4+ T cells
Source: eLife journal article supplement (doi:10.7554/elife.34655), 2018-04-30
Supplement: supp [file elife-34655-supp-v1.zip › elife_poa_e34655_Figure_2_source_data_1.xlsx]

## Sheet: Sheet1
Patients Samples
aCD3/CD28	6.63	20.53	1.21	69.17
JQ1	0.06	2.14	2.21	2.53
Panobinostat	4.91	2.75	2.97	0.98
Bryostatin	2.33	2.3	2.15	20.25
Bryostatin + JQ1	19.89	19.79	53.69	411.57
Bryostatin + Panobinostat	47	117.7	236.22	882.22
GKO infected cells
aCD3/CD28	1.034	31.991	0.808
JQ1	0.845	0.677	1.807
Panobinostat	2.038	9.313	5.306
Bryostatin		4.119	8.212
Bryostatin + JQ1	4.673	13.772	5.598
Bryostatin + Panobinostat	7.98	126.618
