# Supplementary material for: Distinct chromatin functional states correlate with HIV latency reactivation in infected primary CD4+ T cells
Source: eLife journal article supplement (doi:10.7554/elife.34655), 2018-04-30
Supplement: supp [file elife-34655-supp-v1.zip › elife_poa_e34655_Figure_3_source_data_1.xlsx]

## Sheet: Sheet1
	% GFP cells				fold change relative to DMSO				fold change relative to DMSO (median)				% Live cells
DMSO	1.51	1.11	2.23	0.89	1	1	1	1	1	1	1	1	79.4	84.3	80.8
CD3/CD28	5.14	3.61	4.29	4.88	3.40397	3.25225	1.92377	5.48315	1.28268	1.39969	1.08428	2.32482	81.2	78.3	74.3
JQ1	1.98	1.85	1.71	1.2	1.31126	1.66667	0.766816	1.34831	0.85419	1.05364	0.907906	1.12642	83.5	86.9	83.8
Panobinostat	2.76	6.14	3.1	2.65	1.82781	5.53153	1.39013	2.97753	0.740782	0.914389	1.03736	1.01176	40.4	13*	76.1
Bryostatin	3.17	2.69	2.91	3.07	2.09934	2.42342	1.30493	3.44944	1.08101	1.22434	1.01129	1.09781	85.4	74.7	83.5
Bryostatin + JQ1	4.01	3.22	2.95	2.83	2.65563	2.9009	1.32287	3.17977	1.03352	1.35998	1.04518	1.0188	79.6	80.9	83
Bryostatin + Panobinostat	2.3	7.05	7.77	5	1.52318	6.35135	3.4843	5.61798	0.702235	1.12635	1.25282	1.06995	54.7	7.68*	52.4
