# Supplementary material for: Distinct chromatin functional states correlate with HIV latency reactivation in infected primary CD4+ T cells
Source: eLife journal article supplement (doi:10.7554/elife.34655), 2018-04-30
Supplement: supp [file elife-34655-supp-v1.zip › elife_poa_e34655_Figure_4_source_data_1.xlsx]

## Sheet: Sheet1
	Double Negative				NRLIC				RLIC
CD69-/CD25-/HLA-DR-	1.2264	0.77	0.29442	0.81874	0.34017	0.4	0.52	0.6768	0.22866	0.435	0	0.39249
CD69-/CD25-/HLA-DR+	0.2336	0.25	0.12558	0.52126	0.16983	0.09	0	0.1232	1.83134	1.97446	2.78	7.61751
CD69+/CD25-/HLA-DR-	23.7636	24.3	30.7584	25.6468	22.632	24.6	26.3056	23.6992	21.7728	20.9	15.2775	13.2908
CD69+/CD25-/HLA-DR+	4.9364	4.35	7.6416	13.1532	4.968	4.4	6.4944	13.1008	3.4272	3.05	2.2225	9.0092
CD69-/CD25+/HLA-DR-	0.19364	0.13	0.13416	0.1024	0.25	0.85	0.07326	0.062	0.115	0.2	0.28	0.2
CD69-/CD25+/HLA-DR+	0.27636	0.26	0.10584	0.5376	0	0.06	0.14674	0.248	0.115	0.17	0	0
CD69+/CD25+/HLA-DR-	51.282	50.8	41.1684	25.3968	47.4708	51.65	41.832	19.3752	51.185	53.6	60.8204	29.2595
CD69+/CD25+/HLA-DR+	18.018	18.64	19.7316	33.8032	24.1292	18.65	24.568	42.7248	21.315	21.45	18.5796	40.2405
