# Supplementary material for: Distinct chromatin functional states correlate with HIV latency reactivation in infected primary CD4+ T cells
Source: eLife journal article supplement (doi:10.7554/elife.34655), 2018-04-30
Supplement: supp [file elife-34655-supp-v1.zip › elife_poa_e34655_Figure_5_source_data_1.xlsx]

## Sheet: Sheet1
	PIC	NRLIC	RLIC
Up Regulated	11.0193	10.7612	0
Down Regulated	13.4986	7.61155	7.27273
