# Supplementary material for: Distinct chromatin functional states correlate with HIV latency reactivation in infected primary CD4+ T cells
Source: eLife journal article supplement (doi:10.7554/elife.34655), 2018-04-30
Supplement: supp [file elife-34655-supp-v1.zip › elife_poa_e34655_Figure_5_source_data_2.xlsx]

## Sheet: Sheet1
Unstimulated	PIC	NRLIC	RLIC		48h stimulation	PIC	NRLIC	RLIC
	585.138	279.471	437.626			740.475	148.692	295.371
	1033.49	540.658	246.052			1965.2	1495.01	490.274
	468.491	49.645	105.462			827.942	40.4682	80.8752
	707.412	260.843	65.6008			920.829	165.068	61.4997
	957.994	41.4451	94.5254			878.679	34.6734	61.8474
	1102.83	214.067	225.868			996.508	170.427	201.964
	1727.78	528.662	714.44			1053.57	662.406	465.271
	3668.35	300.127	1008.77			5929.11	566.368	1253.65
	207.089	664.782	405.901			206.899	651.927	556.22
	907.868	31.9188	574.961			662.111	36.1036	1009.68
	851.398	581.887	1088.92			1263.59	611.378	898.23
	38.0572	875.159	17.8671			31.4065	507.971	16.9567
	657.072	900.202	4102.5			561.808	1296.47	2245.33
	468.958	141.14	108.988			350.811	121.309	95.6015
	403.983	377.884	34.8606			488.552	328.132	31.6119
	39.5411	96.5106	2151.78			37.9231	128.696	1919.81
	1235.11	162.006	1449.72			2883.46	165.868	2240.43
	946.812	3700.37	46.6436			843.37	3144.59	39.736
	1299.07	1192.41	246.566			1564.27	776.897	379.956
	120.059	45.4969	527.311			109.969	46.0807	671.555
	207.173	74.6561	58.678			387.609	64.0306	56.1748
	2306.16	44.7809	743.886			956.394	45.109	725.231
	1492.42	1004.05	535.581			1227.28	1340.96	888.965
	1309.35	94.8878	139.198			400.498	70.7364	117.02
	379.798	955.923	77.3392			728.898	759.384	53.7071
	2465.05	168.686	1408.36			917.157	285.784	469.112
	1053.42	37.4046	657.484			829.242	31.8667	1210.12
	484.615	32.0759	65.6179			368.649	29.6346	64.3773
	1168.07	156.711	480.257			1055.68	133.352	379.257
	188.997	2558.3	927.477			246.175	867.207	866.549
	802.753	107.535	682.842			806.451	91.9624	476.32
	1957.97	99.7685	118.443			1543.26	93.298	102.419
	500.777	64.4715	377.086			130.936	54.4079	189.699
	1135.43	52.0488	46.3735			923.56	46.0935	42.7979
	182.055	3035.64	3467.99			160.745	1941.2	1796.61
	39.2536	75.2985	656.925			41.5645	1133.57	426.075
	241.76	824.514	1148.4			606.154	578.817	107.008
	3071.05	388.738	5227.02			2704.26	389.015	1483.19
	1026.28	50.4652	184.206			1645.55	43.6953	368.328
	786.434	100.877	492.099			914.196	94.0559	401.998
	718.751	856.962	951.514			584.296	1638.91	856.158
	899.521	228.721	982.423			844.656	731.569	540.129
	341.509	2331.78	1780.61			266.345	3166.29	2165.45
	296.104	50.9215	2244.73			261.306	42.6902	2436.53
	295.593	55.2177	410.372			238.928	50.0458	227.598
	955.923	64.8931	860.267			759.384	50.8446	1010.03
	398.117	201.738	2245.57			450.897	166.804	2486.03
	948.529	755.462	126.197			1367.44	962.723	84.2448
	591.427	37.9738	728.549			294.511	37.9233	502.608
	190.371	80.5557	2811.13			247.31	69.9318	2462.65
	548.236	864.021	301.742			774.817	695.983	277.621
	6427.6	172.771	1674.1			10960.3	140.221	1936
	286.328	63.0534	215.897			468.86	60.6623	387.396
	565.423	415.693	524.52			1063.54	408.781	498.186
	2209.99	670.614	1631.67			1228.25	173.096	1283.79
	1170.95	107.205	3753.62			2048.99	241.339	4386.56
	3426.06	1159.31	354.061			2516.81	888.322	92.6787
	1377.89	45.794	1821.14			471.241	39.115	1344.02
	624.488	163.316	2772.18			932.247	151.417	4809.04
	111.487	50.9375	547.414			101.029	46.9209	848.247
	537.214	115.859	361.359			241.742	102.584	293.661
	6000.95	60.5622	585.138			1008.21	69.3175	740.475
	7659.71	354.92	3467.99			3776.78	357.414	1796.61
	274.368	59.2744	656.925			637.676	160.175	426.075
	1836.79	370.737	1148.4			968.198	247.89	107.008
	1666.54	1224.43	5227.02			2097.39	395.653	1483.19
	722.463	40.9603	184.206			2449.34	34.6138	368.328
	492.456	709.414	492.099			425.293	537.55	401.998
	1153.35	110.414	951.514			1106.27	346.147	856.158
	727.005	649.342	982.423			214.658	804.702	540.129
	2620.45	152.286	1780.61			2303.94	123.628	2165.45
	1549.51	747.453	2244.73			2465.15	681.919	2436.53
	1242.77	371.328	410.372			1374.27	379.325	227.598
	132.067	1183.31	860.267			110.116	514.484	1010.03
	2622.34	32.2169	2245.57			1048.29	28.4033	2486.03
	321.187	108.892	126.197			224.305	118.883	84.2448
	2253.29	209.219	728.549			1576.98	89.2936	502.608
	208.311	357.358	2811.13			750.262	1080.04	2462.65
	358.631	378.027	301.742			284.369	700.759	277.621
	32.1565	84.0523	1674.1			27.7711	71.9751	1936
	76.6683	242.523	215.897			64.9874	232.182	387.396
	477	87.7626	524.52			769.514	66.3124	498.186
	58.7806	194.53	1631.67			53.4001	684.963	1283.79
	709.082	897.195	3753.62			721.792	464.946	4386.56
	1602.28	3477.83	354.061			2568.42	2447.54	92.6787
	598.457	1008.77	1821.14			299.667	1253.65	1344.02
	501.217	58.4619	2772.18			472.281	49.4168	4809.04
	45.794	98.1226	1674.1			39.115	105.649	1936
	41.6734	113.645	215.897			37.2878	201.47	387.396
	1359.58	6136.67	524.52			1263.97	3136.11	498.186
	1192.66	1040.4	1631.67			2695.99	602.406	1283.79
	1869.91	71.3056	3753.62			726.971	66.4604	4386.56
	1494.7	133.654	354.061			2793.22	144.595	92.6787
	365.641	555.078	1821.14			288.525	2050.76	1344.02
	1209.82	3193.13	2772.18			1654.36	1050.04	4809.04
	5087.09	68.3482	1821.14			6676.63	63.253	1344.02
	411.261	89.4723	2772.18			388.409	79.5344	4809.04
	511.433	1712.24	547.414			1374.96	473.732	848.247
	1183.31	355.597	361.359			514.484	219.105	293.661
	179.232	46.5347	585.138			207.685	43.3436	740.475
	3063.49	128.984	547.414			1367.21	116.828	848.247
	942.186	240.637	361.359			202.656	186.969	293.661
	54.694	280.217	585.138			47.281	374.665	740.475
	1097.83	271.19	547.414			611.134	431.046	848.247
	210.258	336.49	361.359			350.682	1352.69	293.661
	2723.77	571.921	585.138			1476.03	1070.95	740.475
	491.31	2159.43	547.414			1433.41	1889.75	848.247
	5328.57	130.336	361.359			3310.58	191.698	293.661
	846.056	87.8379	585.138			900.482	73.6359	740.475
	1071.1	226.73	585.138			3921.81	201.621	740.475
	1330.12	516.203				1150.17	1206
	873.855	176.18				297.955	152.909
	80.2202	666.403				66.7689	324.834
	412.659	80.1501				306.512	99.2492
	592.658	1090.38				235.121	535.006
	1938.97	2805.13				2006.78	2214.83
	157.068	1276.1				131.875	1586.97
	195.21	465.09				181.935	886.636
	35.2419	135.653				27.03	169.753
	118.651	205.107				548.421	181.303
	975.324	186.235				2921.8	164.647
	265.372	2011.93				309.823	909.664
	1270.22	1090.72				504.505	1226.03
	447.155	3180.45				374.623	1097.04
	2114.46	511.1				1822.16	977.659
	897.195	97.7006				464.946	49.1369
	182.788	194.968				137.675	218.744
	2791.93	319.276				1703.55	484.248
	683.99	465.989				1706.12	1338.69
	1278.38	1171.14				1239.65	1535.77
	1192.84	1398.14				854.263	1649.36
	251.848	158.179				199.394	129.826
	574.961	58.0303				1009.68	54.2731
	2558.04	83.0938				2318.16	74.5423
	230.039	162.031				180.422	195.891
	622.333	398.035				695.648	294.045
	834.283	402.246				558.985	783.635
	1197.48	63.2512				802.505	55.2769
	72.5289	4102.5				56.8207	2245.33
	63.974	3981.69				54.9476	1101.91
	199.615	213.223				166.187	412.649
	185.221	204.113				159.373	625.119
	434.115	50.7424				514.66	44.3746
	2454.03	951.337				2333.81	328.851
	463.987	94.9826				1564.38	237.011
	1589.97	120.438				949.884	95.7541
	2652.7	1617.96				1612.8	1717.03
	252.766	542.268				242.3	1024.43
	918.712	117.493				1510.37	98.1365
	4299.95	62.6439				4900.56	52.1166
	2616.66	405.657				4604.47	432.559
	3030.24	1063.73				2649.66	392.166
	296.665	93.2484				356.993	83.8316
	759.51	1038.21				1265.97	1710.97
	291.335	87.0867				837.683	69.0883
	2575.29	197.743				2090.99	219.877
	707.132	2074.6				568.244	779.579
	96.5028	349.355				48.5159	437.535
	666.403	65.5471				324.834	56.5285
	77.7	48.8086				56.2102	44.0333
	1468.37	359.495				4160.92	144.095
	1548.85	481.255				1951.68	192.146
	1103.02	38.026				1134.48	35.5579
	6407.55	190.291				3668.54	335.615
	222.585	474.902				168.712	918.666
	764.66	193.504				324.563	745.596
	1743.38	276.711				1047.23	298.838
	2283.69	848.357				2476.12	603.271
	159.737	61.5613				563.412	53.1997
	1580.34	145.45				758.486	176.52
	1062.43	46.1516				2052.51	77.0901
	2078.83	544.576				775.574	721.139
	1771.07	109.522				596.954	93.3155
	1517.64	410.372				4153.65	227.598
	26.8528	150.062				25.7304	423.848
	136.386	524.52				122.417	498.186
	883.155	209.27				441.198	175.02
	3180.19	1750.05				2199.14	1291.77
	1248.58	713.428				2239.58	669.438
	129.492	93.3238				132.766	103.019
	337.261	654.981				245.951	1226.92
	83.0938	1583.73				74.5423	1414.02
	12721.5	537.023				8235.48	958.125
	554.318	2839.97				353.099	3302.75
	1400.75	442.613				535.555	379.646
	1960.21	209.392				1028.57	209.891
	2314.27	832.245				3257.17	962.905
	2864.42	126.234				2542.61	111.554
	1195.98	1326.98				1749.39	906.212
	338.954	1228.79				564.921	1255.04
	982.423	112.43				540.129	88.6278
	583.254	901.327				774.048	530.707
	697.165	341.261				1148.81	376.559
	206.583	5654.14				269.216	3723.24
	122.38	200.086				138.952	648.669
	344.162	1190.78				333.219	813.662
	244.18	2427.83				351.453	2417.21
	131.461	454.891				136.678	767.575
	1396.16	119.67				1309.11	114.693
	62.3941	471.287				39.8388	760.124
	844.686	1733.52				1171.07	1599.83
	1941.71	3327.48				1923.73	775.132
	951.337	587.121				328.851	861.02
	76.4274	39.5446				286.743	34.5898
	837.922	951.587				381.858	2309.74
	4356.15	375.244				1803.25	355.176
	1538.49	1906.43				3279.53	1056.66
	2905.36	169.853				8768.09	131.942
	62.6439	142.109				52.1166	115.655
	1087.74	2280.93				744.614	1748.78
	1969.14	130.394				1538.73	110.57
	370.4	1227.24				2263.23	1464.9
	915.227	1427.79				1506.3	954.736
	2288.69	581.356				1898.4	380.758
	2643.47	675.828				2048.7	2003.97
	2018.35	94.1495				1539.98	81.1445
	637.79	1400.5				925.554	1318.45
	611.202	61.1009				753.073	53.3344
	1119.07	90.3046				1171.14	89.0175
	476.101	109.682				383.125	86.2207
	1852.72	164.52				2605.34	136.605
	625.252	44.1576				627.914	37.9874
	3495.37	1222.53				3495.53	1882.56
	157.496	414.984				124.165	160.974
	4147.44	34.5005				2928.18	30.3317
	507.455	53.927				955.327	44.6379
	2942.91	43.285				9316.81	39.0305
	349.355	264.268				437.535	123.361
	344.453	139.152				626.757	123.718
	4167.16	1144.15				5578.75	882.7
	1567.83	600.546				2709.98	457.393
	345.721	3037.35				276.865	840.229
	402.203	2814.46				231.188	2086.98
	3016.04	153.701				616.048	138.251
	280.43	86.7419				802.537	86.79
	758.32	1583.04				482.787	1080.45
	2378.6	137.373				591.656	117.77
	59.1018	76.5583				74.5412	70.7183
	387.902	166.054				482.254	211.252
	4498.53	607.927				1913.32	572.757
	951.125	161.9				588.824	150.623
	1415.84	208.635				893.051	646.66
	2991.57	266.632				1441.2	164.28
	1067.2	3753.12				827.079	1954.65
	273.392	342.637				184.684	682.114
	848.357	1963.69				603.271	1353.22
	396.503	58.768				429.332	60.7744
	2092.33	671.408				422.35	767.233
	159.624	354.738				167.742	287.654
	548.344	216.94				1711.67	93.3589
	1820.92	99.4106				2173.81	87.1025
	150.062	1091.77				423.848	1677.11
	316.575	132.193				1298.21	55.7704
	641.327	45.5629				1944.42	39.0633
	352.303	145.173				598.06	160.405
	1207.6	646.797				2922.16	608.304
	765.382	97.8689				465.226	79.7022
	5094.28	458.903				5528.84	333.99
	890.221	219.461				1722.1	283.454
	2169.3	65.6179				2249.94	64.3773
	50.2148	481.864				34.9903	418.375
	900.051	135.932				1403.42	117.144
	1583.73	907.016				1414.02	666.409
	1282.73	20.1205				897.343	19.487
	3684.9	179.682				5054.51	165.967
	442.613	247.662				379.646	458.365
	1066.86	844.559				1719.52	825.126
	1260.71	25.3659				2991.73	26.7866
	593.467	568.813				1461.41	491.018
	2400.28	154.498				1697.15	82.4218
	5330.25	948.989				5953.37	642.739
	571.257	638.068				1108.17	388.828
	658.396	124.778				496.695	106.004
	982.816	486.638				1079.91	646.972
	672.351	23.3413				294.686	18.8097
	36.9031	140.122				33.0776	125.401
	594.948	382.132				513.931	766.137
	908.307	1036.33				492.055	305.541
	759.258	899.563				432.652	186.298
	5654.14	2883.18				3723.24	5726.52
	2691.1	1840.32				1228.41	1229.42
	261.319	57.666				200.41	51.0654
	2112.37	314.466				2799.06	324.119
	862.252	37.3851				456.223	43.4991
	1078.91	89.7515				845.815	118.648
	1135.28	133.167				975.307	273.497
	224.311	2666.98				241.746	985.979
	527.311	527.83				671.555	183.437
	141.239	1147.12				117.093	1201.18
	394.764	379.798				526.649	728.898
	146.706	1148.4				144.961	107.008
	2156.72	574.94				3283.29	834.188
	9996.71	62.5008				11888.6	71.5556
	4308.46	1197.48				4552.58	802.505
	1707.97	2913.01				1209.31	1462.99
	368.515	630.086				318.711	2514.45
	578.787	111.822				832.935	99.4189
	753.557	1524.28				2040.12	2509.76
	84.7481	1877.48				76.8667	1252.23
	1885.2	55.4674				1054.68	44.8727
	333.348	65.1132				458.406	53.9836
	809.065	708.834				1253.38	430.798
	602.477	807.246				571.909	532.821
	355.234	453.842				811.022	609.091
	3149.87	169.834				1208.92	153.793
	2512.17	157.818				4221.26	762.544
	792.078	103.048				581.938	128.937
	1427.79	676.909				954.736	821.024
	273.491	132.892				858.265	333.239
	491.222	854.429				607.394	817.953
	390.469	1745.42				274.321	1020.88
	394.499	371.644				286.275	805.099
	2708.88	890.221				1643.97	1722.1
	129.394	251.191				87.537	321.207
	212.713	527.311				774.734	671.555
	264.268	50.3713				123.361	50.3339
	1402.82	112.463				2437.88	104.503
	641.609	4070.17				1235.45	2440.81
	1377.41	330.065				1327.58	271.535
	469.759	100.66				435.917	52.3984
	1070.82	2156.72				1021.51	3283.29
	372.601	246.203				890.226	747.645
	877.518	1147.12				1029.2	1201.18
	147.898	379.798				106.057	728.898
	866.751	1148.4				886.13	107.008
	498.95	574.94				440.998	834.188
	927.44	62.5008				689.999	71.5556
	1633.12	1197.48				736.415	802.505
	1629.18	2913.01				2544.54	1462.99
	2146.49	630.086				2236.93	2514.45
	196.088	111.822				197.298	99.4189
	1832.89	1524.28				1043.88	2509.76
	304.072	1877.48				654.668	1252.23
	2131.1	55.4674				1136.14	44.8727
	849.927	65.1132				567.156	53.9836
	4589.38	708.834				1417.76	430.798
	937.89	807.246				351.956	532.821
	587.542	453.842				891.985	609.091
	213.194	169.834				183.496	153.793
	208.635	157.818				646.66	762.544
	1932.23	103.048				3738.7	128.937
	220.058	676.909				220.714	821.024
	1219.79	132.892				1893.16	333.239
	342.452	854.429				263.674	817.953
	1598.52	1745.42				2367.96	1020.88
	499.657	371.644				1806.03	805.099
	1831.48	890.221				1066.84	1722.1
	750.182	251.191				909.907	321.207
	1963.69	527.311				1353.22	671.555
	878.185	50.3713				644.572	50.3339
	609.113	112.463				537.189	104.503
	246.203	4070.17				747.645	2440.81
	804.558	330.065				638.926	271.535
	795.176	100.66				1133.41	52.3984
	1263.61	371.644				6276.09	805.099
	1355.98	890.221				1958.41	1722.1
	66.1404	251.191				60.0163	321.207
	2251.08	527.311				320.012	671.555
	143.917	50.3713				132.077	50.3339
	497.508	112.463				723.995	104.503
	72.0125	4070.17				55.5946	2440.81
	1408.36	330.065				469.112	271.535
	97.5376	100.66				2859.79	52.3984
	561.297	4070.17				276.614	2440.81
	812.998	330.065				441.012	271.535
	3110.29	100.66				2833.82	52.3984
	717.592	2156.72				1123.4	3283.29
	708.756	246.203				364.697	747.645
	865.13	2156.72				738.095	3283.29
	2131.45	246.203				3185.74	747.645
	841.469	2156.72				926.779	3283.29
	3753.62	246.203				4386.56	747.645
	370.86	2156.72				514.453	3283.29
	2831.7	246.203				1749.17	747.645
	198.293	2156.72				388.675	3283.29
	58.8568	246.203				50.4222	747.645
	3088.94	246.203				1701.31	747.645
	1601.08	246.203				1007.13	747.645
	1351.85	246.203				1185.45	747.645
	228.118	246.203				187.153	747.645
	774.102	246.203				915.516	747.645
	5947.41					1885.02
	1325.07					1739
	948.989					642.739
	967.857					560.575
	764.364					1009.76
	1067.77					1058.8
	2487.43					87.6821
	4783.89					3396.32
	495.203					384.876
	729.789					459.881
	1220.79					910.734
	969.885					459.414
	772.126					1291.26
	1036.33					305.541
	3657.78					6906.74
	722.854					721.829
	318.576					475.529
	687.897					673.199
	2239.48					1071.12
	560.217					446.344
	264.112					225.28
	1157.49					1315.32
	1049.25					547.787
	190.106					169.538
	711.698					319.565
	743.248					711.847
	788.097					230.106
	116.269					104.54
	232.111					198.007
	753.654					519.727
	172.131					100.733
	2946.83					1131.9
	488.154					225.616
	163.495					277.721
	377.086					189.699
	493.908					617.295
	1430.25					797.622
	82.3029					57.2735
	751.969					938.645
	1185.19					653.027
	342.375					274.322
	398.676					409.288
	653.131					676.23
	101.547					87.2166
	487.826					883.007
	2622.73					2330.94
	1321.48					1232.15
	304.248					229.552
	926.827					1142.44
	651.136					682.724
	820.766					1606.92
	202.524					184.116
	538.43					412.767
	3957.99					2079.67
	1135.09					1134.44
	1531.62					1469.18
	1008.77					1253.65
	631.954					328.234
	3320.91					6548.1
	224.921					437.551
	271.248					633.853
	449.003					125.307
	2262.94					1856.25
	363.626					370.005
	1647.73					2319.39
	1384.34					253.823
	665.959					454.168
	698.707					182.512
	745.794					2619.38
	681.041					1254.59
	777.067					340.436
	30.6702					676.861
	275.278					542.582
	314.126					155.313
	450.431					371.371
	1360.93					2159.6
	741.603					1140.48
	703.599					888.444
	93.7343					248.932
	1308.81					1354.23
	1520.61					585.951
	930.439					1219.89
	551.392					437.172
	525.959					617.286
	2473.07					916.588
	651.636					504.495
	2884.62					3903.9
	664.768					1449.35
	2638.13					3891.41
	860.821					1192.78
	110.042					154.564
	158.677					158.778
	4040.24					4111.77
	1060					838.529
	6210.97					6479.71
	382.947					405.363
	499.298					557.648
	2181.36					2742.24
	336.786					606.657
	1773.18					1694.96
	3354.59					4570.21
	325.411					933.635
	262.392					323.411
	2063.77					3981.51
	2338.25					1277.44
	609.635					775.979
	261.302					208.09
	403.261					270.483
	184.206					368.328
	190.026					280.82
	1392.93					5092.93
	557.685					894.054
	1219.13					1631.03
	731.852					1663.56
	674.132					384.033
	431.043					1048.01
	6089.08					854.775
	1355.92					1119.48
	921.447					409.256
	381.087					459.353
	453.842					609.091
	2470.76					1768.59
	90.3046					89.0175
	1045.03					436.417
	2515.8					1082.6
	260.158					857.213
	2418.64					1094.65
	52.8002					1232.43
	1549.97					2159.61
	266.828					210.793
	328.32					636.885
	297.994					416.7
	534.396					1029.92
	825.077					664.54
	202.069					648.765
	2011.93					909.664
	86.4574					83.025
	2478.74					2244.25
	430.594					715.639
	461.771					482.131
	511.817					864.427
	432.159					1601.5
	699.837					659.206
	322.931					242.183
	1886.76					890.524
	619.589					486.618
	342.375					274.322
	398.676					409.288
	653.131					676.23
	101.547					87.2166
	487.826					883.007
	2622.73					2330.94
	1321.48					1232.15
	304.248					229.552
	926.827					1142.44
	651.136					682.724
	820.766					1606.92
	202.524					184.116
	538.43					412.767
	3957.99					2079.67
	1135.09					1134.44
	1531.62					1469.18
	1008.77					1253.65
	631.954					328.234
	3320.91					6548.1
	224.921					437.551
	271.248					633.853
	449.003					125.307
	2262.94					1856.25
	363.626					370.005
	1647.73					2319.39
	1384.34					253.823
	665.959					454.168
	698.707					182.512
	745.794					2619.38
	681.041					1254.59
	777.067					340.436
	30.6702					676.861
	275.278					542.582
	314.126					155.313
	450.431					371.371
	1360.93					2159.6
	741.603					1140.48
	703.599					888.444
	93.7343					248.932
	1308.81					1354.23
	1520.61					585.951
	930.439					1219.89
	551.392					437.172
	525.959					617.286
	2473.07					916.588
	651.636					504.495
	2884.62					3903.9
	664.768					1449.35
	2638.13					3891.41
	860.821					1192.78
	110.042					154.564
	158.677					158.778
	4040.24					4111.77
	1060					838.529
	6210.97					6479.71
	382.947					405.363
	499.298					557.648
	2181.36					2742.24
	336.786					606.657
	1773.18					1694.96
	3354.59					4570.21
	325.411					933.635
	262.392					323.411
	2063.77					3981.51
	2338.25					1277.44
	609.635					775.979
	261.302					208.09
	403.261					270.483
	184.206					368.328
	190.026					280.82
	1392.93					5092.93
	557.685					894.054
	1219.13					1631.03
	731.852					1663.56
	674.132					384.033
	431.043					1048.01
	6089.08					854.775
	1355.92					1119.48
	921.447					409.256
	381.087					459.353
	453.842					609.091
	2470.76					1768.59
	90.3046					89.0175
	1045.03					436.417
	261.302					208.09
	403.261					270.483
	184.206					368.328
	190.026					280.82
	1392.93					5092.93
	557.685					894.054
	1219.13					1631.03
	731.852					1663.56
	674.132					384.033
	431.043					1048.01
	6089.08					854.775
	1355.92					1119.48
	921.447					409.256
	381.087					459.353
	453.842					609.091
	2470.76					1768.59
	90.3046					89.0175
	1045.03					436.417
	2515.8					1082.6
	260.158					857.213
	2418.64					1094.65
	52.8002					1232.43
	1549.97					2159.61
	266.828					210.793
	328.32					636.885
	297.994					416.7
	534.396					1029.92
	825.077					664.54
	2515.8					1082.6
	260.158					857.213
	2418.64					1094.65
	52.8002					1232.43
	1549.97					2159.61
	266.828					210.793
	328.32					636.885
	297.994					416.7
	534.396					1029.92
	825.077					664.54
	2515.8					1082.6
	260.158					857.213
	2418.64					1094.65
	52.8002					1232.43
	1549.97					2159.61
	266.828					210.793
	328.32					636.885
	297.994					416.7
	534.396					1029.92
	825.077					664.54
	202.069					648.765
	2011.93					909.664
	86.4574					83.025
	2478.74					2244.25
	430.594					715.639
	461.771					482.131
	511.817					864.427
	432.159					1601.5
	202.069					648.765
	2011.93					909.664
	86.4574					83.025
	2478.74					2244.25
	430.594					715.639
	461.771					482.131
	511.817					864.427
	432.159					1601.5
	202.069					648.765
	2011.93					909.664
	86.4574					83.025
	2478.74					2244.25
	430.594					715.639
	461.771					482.131
	511.817					864.427
	432.159					1601.5
	202.069					648.765
	2011.93					909.664
	86.4574					83.025
	2478.74					2244.25
	430.594					715.639
	461.771					482.131
	511.817					864.427
	432.159					1601.5
	699.837					659.206
	322.931					242.183
	699.837					659.206
	322.931					242.183
	699.837					659.206
	322.931					242.183
	699.837					659.206
	322.931					242.183
	699.837					659.206
	322.931					242.183
	322.931					242.183
	1886.76					890.524
	619.589					486.618
	1886.76					890.524
	619.589					486.618
	1886.76					890.524
	619.589					486.618
	1886.76					890.524
	619.589					486.618
	1886.76					890.524
	619.589					486.618
	1886.76					890.524
	619.589					486.618
	1886.76					890.524
	619.589					486.618
	1886.76					890.524
	619.589					486.618
	1886.76					890.524
	619.589					486.618
	619.589					486.618
	619.589					486.618
	619.589					486.618
	619.589					486.618
	619.589					486.618
	619.589					486.618
