# Supplementary material for: Distinct chromatin functional states correlate with HIV latency reactivation in infected primary CD4+ T cells
Source: eLife journal article supplement (doi:10.7554/elife.34655), 2018-04-30
Supplement: supp [file elife-34655-supp-v1.zip › elife_poa_e34655_Figure_6_source_data_1.xlsx]

## Sheet: Sheet1
	Genic			Intergenic
PIC	78.5714	90.3727	83.1418	21.4286	9.62733	16.8582
RLIC	89.2857	78.8732	74.6032	10.7143	21.1268	25.3968
NRLIC	64.4841	70	58.2677	35.5159	30	41.7323
		PIC			RLIC			NRLIC
High	14.8368	15	20.202	14.2857	26.4706	9.83607	6.88935	2	4.92958
Medium	16.0237	20.3125	15.8249	25	11.7647	9.83607	8.76827	8	9.15493
Low	28.7834	35.625	27.2727	35.7143	23.5294	18.0328	18.1628	24	11.9718
Trace	17.2107	14.375	12.4579	14.2857	8.82353	9.83607	13.7787	12	16.9014
Silent	23.1454	14.6875	24.2424	10.7143	29.4118	52.459	52.4008	54	57.0423
	PIC			RLIC			NRLIC
Intron	68.0135	70.1031	64.0553	96	51.7857	61.7021	68.9231	71.4286	58.1081
Exon	16.835	14.7766	16.129	0	21.4286	10.6383	12.3077	5.71429	12.1622
UTR	15.1515	15.1203	19.8157	4	26.7857	27.6596	18.7692	22.8571	29.7297
	Sense			Antisense
PIC	51.8519	49.8282	48.8479	48.1481	50.1718	51.1521
RLIC	36	53.5714	51.0638	64	46.4286	48.9362
NRLIC	46.4615	60	45.9459	53.5385	40	54.0541
