# Supplementary material for: Distinct chromatin functional states correlate with HIV latency reactivation in infected primary CD4+ T cells
Source: eLife journal article supplement (doi:10.7554/elife.34655), 2018-04-30
Supplement: supp [file elife-34655-supp-v1.zip › elife_poa_e34655_Figure_7_source_data_1.xlsx]

## Sheet: Sheet1
	PIC				RLIC				NRLIC
K4me1	0.915525	0.872308	1.01742		0.970181	0.869784	1.01157		0.675589	0.666648	0.701273
H3K36me3	1.008	0.758293	1.13544	1.14046	1.03106	0.665548	1.11943	1.00063	0.666828	0.578202	0.69997	0.734208
H3K27me3	0.323713	0.304159	0.245259		0.307801	0.323705	0.282986		0.420303	0.396815	0.365481
H3K9me3	0.307618	0.354352	0.304929	0.371013	0.365245	0.367579	0.412548	0.400664	0.437302	0.428546	0.384117	0.450842
DNAseI	0.547777	0.615891	0.623009	0.580245	0.410629	0.416948	0.491176	0.492615	0.424277	0.456806	0.467939	0.465114
	PIC			RLIC			NRLIC
LAD	0.265487	0.199377	0.244068	0.25	0.323529	0.33871	0.351579	0.26	0.35
