# Supplementary material for: Distinct chromatin functional states correlate with HIV latency reactivation in infected primary CD4+ T cells
Source: eLife journal article supplement (doi:10.7554/elife.34655), 2018-04-30
Supplement: supp [file elife-34655-supp-v1.zip › elife_poa_e34655_Source_data_1.xlsx]

## Sheet: integration sites and genes
	L = NRLIC, non reactivated infected cells
	RL= RLIC, reactivated latently infected cells
	P=PIC, productively infected cells
	donor	status	chromosome	start	end	size	strand	expression over integration site (same strand)	expression over integration site (opposite strand)	gene symbol	ensembl accession	description gene	start gene	end gene	distance to closest gene	gene strand	expression gene	integration utr/intron	direction integration and gene
2	D1	L	1	914981	915600	619	+	0	0	C1orf170	ENSG00000187642	chromosome 1 open reading frame 170 [Source:HGNC Symbol;Acc:28208]	910579	917497	0	-	0.00434658	exon	opposite
51	D1	L	1	42738586	42739204	618	+	0.0971695	0.0971695	FOXJ3	ENSG00000198815	forkhead box J3 [Source:HGNC Symbol;Acc:29178]	42642210	42801548	0	-	0.534895	intron	opposite
53	D1	L	1	43264475	43265095	620	+	0.121071	0.108964	C1orf50	ENSG00000164008	chromosome 1 open reading frame 50 [Source:HGNC Symbol;Acc:28795]	43232940	43264127	348	+	0.659086	NA	same
62	D1	L	1	55139743	55140244	501	+	0.0149771	0.0149771	HEATR8	ENSG00000184313	HEAT repeat containing 8 [Source:HGNC Symbol;Acc:24802]	55107459	55207981	0	+	0.130515	exon	same
63	D1	L	1	65823548	65824049	501	-	0	0	DNAJC6	ENSG00000116675	DnaJ (Hsp40) homolog, subfamily C, member 6 [Source:HGNC Symbol;Acc:15469]	65713902	65881552	0	+	0.0127811	intron	opposite
67	D1	L	1	82594791	82595405	614	+	0	0				0	NA	85499	NA	NA	NA	NA
69	D1	L	1	90021381	90022000	619	+	1.44307	1.40669	LRRC8B	ENSG00000197147	leucine rich repeat containing 8 family, member B [Source:HGNC Symbol;Acc:30692]	89990395	90063423	0	+	0.850076	utr	same
74	D1	L	1	96840726	96841227	501	+	0	0	RP5-898J17.1	ENSG00000231987	No description	96719625	96839681	1045	-	0.00025	NA	opposite
75	D1	L	1	97653985	97654486	501	-	0.269587	0.269587	DPYD	ENSG00000188641	dihydropyrimidine dehydrogenase [Source:HGNC Symbol;Acc:3012]	97543299	98386605	0	-	0.16137	intron	same
86	D1	L	1	119678637	119679138	501	+	0.119817	0.119817	WARS2	ENSG00000116874	tryptophanyl tRNA synthetase 2, mitochondrial [Source:HGNC Symbol;Acc:12730]	119573839	119683294	0	-	0.0702695	intron	opposite
87	D1	L	1	121484295	121484913	618	+	0.133608	0.194339				0	NA	161973	NA	NA	NA	NA
96	D1	L	1	150303438	150304052	614	+	0.207828	0.232279	PRPF3	ENSG00000117360	PRP3 pre-mRNA processing factor 3 homolog (S. cerevisiae) [Source:HGNC Symbol;Acc:17348]	150293925	150325671	0	+	1.23362	intron	same
100	D1	L	1	151178252	151178753	501	+	0.688946	0.61406	PIP5K1A	ENSG00000143398	phosphatidylinositol-4-phosphate 5-kinase, type I, alpha [Source:HGNC Symbol;Acc:8994]	151170425	151222012	0	+	0.584568	intron	same
101	D1	L	1	151202874	151203487	613	+	0.0979608	0.0612255	PIP5K1A	ENSG00000143398	phosphatidylinositol-4-phosphate 5-kinase, type I, alpha [Source:HGNC Symbol;Acc:8994]	151170425	151222012	0	+	0.584568	intron	same
102	D1	L	1	151398940	151399441	501	+	0.25461	0.299542	POGZ	ENSG00000143442	pogo transposable element with ZNF domain [Source:HGNC Symbol;Acc:18801]	151375200	151431941	0	-	1.07155	intron	opposite
103	D1	L	1	151417983	151418484	501	+	0.868671	0.853694	POGZ	ENSG00000143442	pogo transposable element with ZNF domain [Source:HGNC Symbol;Acc:18801]	151375200	151431941	0	-	1.07155	utr	opposite
105	D1	L	1	152129915	152130416	501	+	0	0	RPTN	ENSG00000215853	repetin [Source:HGNC Symbol;Acc:26809]	152126071	152131704	0	-	0	exon	opposite
108	D1	L	1	154383701	154384331	630	+	0.0476608	0.0476608	IL6R	ENSG00000160712	interleukin 6 receptor [Source:HGNC Symbol;Acc:6019]	154377669	154441926	0	+	0.556124	intron	same
122	D1	L	1	155936840	155937341	501	-	1.00346	1.12328	ARHGEF2	ENSG00000116584	Rho/Rac guanine nucleotide exchange factor (GEF) 2 [Source:HGNC Symbol;Acc:682]	155916645	155966129	0	-	0.639494	intron	same
123	D1	L	1	156682610	156683229	619	+	1.01863	1.05501	RP11-66D17.5	ENSG00000223356	No description	156682004	156682966	0	-	0.89004	utr	opposite
127	D1	L	1	164552993	164553611	618	+	0	0	PBX1	ENSG00000185630	pre-B-cell leukemia homeobox 1 [Source:HGNC Symbol;Acc:8632]	164524821	164868533	0	+	0.00393738	intron	same
128	D1	L	1	164553106	164553607	501	-	0	0	PBX1	ENSG00000185630	pre-B-cell leukemia homeobox 1 [Source:HGNC Symbol;Acc:8632]	164524821	164868533	0	+	0.00393738	intron	opposite
138	D1	L	1	192706776	192707391	615	+	0	0				0	NA	70778	NA	NA	NA	NA
139	D1	L	1	193756614	193757115	501	+	0	0				0	NA	55108	NA	NA	NA	NA
140	D1	L	1	194609326	194609944	618	+	0	0				0	NA	151991	NA	NA	NA	NA
142	D1	L	1	199883724	199884225	501	+	0	0.0149771				0	NA	26335	NA	NA	NA	NA
143	D1	L	1	204886577	204887191	614	+	0	0	NFASC	ENSG00000163531	neurofascin [Source:HGNC Symbol;Acc:29866]	204797779	204991950	0	+	0.00147139	utr	same
147	D1	L	1	208172084	208172702	618	+	0	0				0	NA	22885	NA	NA	NA	NA
157	D1	L	1	226347052	226347671	619	+	0.594204	0.751849	PARP1	ENSG00000143799	poly (ADP-ribose) polymerase 1 [Source:HGNC Symbol;Acc:270]	224102741	226595780	0	-	0.246734	exon	opposite
163	D1	L	1	231332871	231333484	613	+	0	0	TRIM67	ENSG00000119283	tripartite motif containing 67 [Source:HGNC Symbol;Acc:31859]	231297858	231357302	0	+	0.00493265	exon	same
169	D1	L	1	241669297	241669910	613	+	0.710216	0.55103	FH	ENSG00000091483	fumarate hydratase [Source:HGNC Symbol;Acc:3700]	241660903	241683061	0	-	0.354905	exon	opposite
170	D1	L	1	241950568	241951069	501	+	0.0149771	0.0449312	WDR64	ENSG00000162843	WD repeat domain 64 [Source:HGNC Symbol;Acc:26570]	241815580	241965435	0	+	0.0106865	intron	same
171	D1	L	1	247569904	247570405	501	-	0	0				0	NA	9053	NA	NA	NA	NA
180	D1	L	2	3389344	3389845	501	-	0	0.0149771	TTC15	ENSG00000171853	tetratricopeptide repeat domain 15 [Source:HGNC Symbol;Acc:24284]	3383446	3488865	0	+	0.699358	utr	opposite
182	D1	L	2	10290186	10290799	613	+	0.0122451	0	C2orf48	ENSG00000163009	chromosome 2 open reading frame 48 [Source:HGNC Symbol;Acc:26322]	10281509	10351851	0	+	0.0132535	intron	same
183	D1	L	2	15029687	15030300	613	+	0	0	AC068286.1	ENSG00000235127	No description	15026771	15047788	0	-	0.0021463	utr	opposite
184	D1	L	2	15974169	15974785	616	+	0	0				0	NA	23168	NA	NA	NA	NA
191	D1	L	2	25378325	25378942	617	+	0.0608292	0.0608292	EFR3B	ENSG00000084710	EFR3 homolog B (S. cerevisiae) [Source:HGNC Symbol;Acc:29155]	25264999	25378243	82	+	0.0077014	NA	same
192	D1	L	2	25644704	25645312	608	+	0.975305	1.11111	DTNB	ENSG00000138101	dystrobrevin, beta [Source:HGNC Symbol;Acc:3058]	25600067	25896503	0	-	0.217664	intron	opposite
210	D1	L	2	43482116	43482617	501	+	0.494244	0.449312	THADA	ENSG00000115970	thyroid adenoma associated [Source:HGNC Symbol;Acc:19217]	43393800	43823185	0	-	0.456027	intron	opposite
213	D1	L	2	48961101	48961723	622	+	0	0	STON1-GTF2A1L	ENSG00000068781	STON1-GTF2A1L readthrough [Source:HGNC Symbol;Acc:30651]	48757064	49003638	0	+	0.0325347	intron	same
214	D1	L	2	56502960	56503579	619	+	0	0	CCDC85A	ENSG00000055813	coiled-coil domain containing 85A [Source:HGNC Symbol;Acc:29400]	56411258	56613308	0	+	0.000484	intron	same
215	D1	L	2	56773259	56773760	501	-	0	0				0	NA	159951	NA	NA	NA	NA
216	D1	L	2	65800174	65800787	613	+	0.0244902	0	AC074391.1	ENSG00000204929	No description	0	NA	0	NA	NA	NA	NA
231	D1	L	2	92169189	92169690	501	-	0	0				0	NA	217145	NA	NA	NA	NA
233	D1	L	2	99272210	99272711	501	+	0.778808	0.898625	MGAT4A	ENSG00000071073	mannosyl (alpha-1,3-)-glycoprotein beta-1,4-N-acetylglucosaminyltransferase, isozyme A [Source:HGNC Symbol;Acc:7047]	99235569	99347589	0	-	1.47509	intron	opposite
235	D1	L	2	109104953	109105454	501	+	0.554152	0.584106	GCC2	ENSG00000135968	GRIP and coiled-coil domain containing 2 [Source:HGNC Symbol;Acc:23218]	109065017	109125871	0	+	1.37793	intron	same
238	D1	L	2	113404462	113404963	501	+	3.86409	3.71432	SLC20A1	ENSG00000144136	solute carrier family 20 (phosphate transporter), member 1 [Source:HGNC Symbol;Acc:10946]	113403434	113421404	0	+	2.08933	exon	same
255	D1	L	2	149385220	149385721	501	+	0	0				0	NA	16288	NA	NA	NA	NA
258	D1	L	2	152283555	152284056	501	+	0.284565	0.299542	RIF1	ENSG00000080345	RAP1 interacting factor homolog (yeast) [Source:HGNC Symbol;Acc:23207]	152266397	152364527	0	+	0.634541	intron	same
264	D1	L	2	173269629	173270242	613	+	0	0				0	NA	21840	NA	NA	NA	NA
265	D1	L	2	174690462	174691243	781	+	0.00961444	0				0	NA	54350	NA	NA	NA	NA
266	D1	L	2	174690579	174691080	501	-	0	0				0	NA	54513	NA	NA	NA	NA
267	D1	L	2	174690580	174691081	501	-	0	0				0	NA	54512	NA	NA	NA	NA
273	D1	L	2	184073725	184074345	620	+	0.0847495	0.0484283				0	NA	47317	NA	NA	NA	NA
275	D1	L	2	187054880	187055500	620	+	0.20582	0.217927				0	NA	106920	NA	NA	NA	NA
276	D1	L	2	188389045	188389664	619	+	0	0	AC007319.1	ENSG00000224063	No description	187867947	188419390	0	+	0.00287682	utr	same
282	D1	L	2	195210096	195210706	610	+	0	0	AC018799.1	ENSG00000225539	No description	195208993	195284369	0	+	0.00269312	utr	same
284	D1	L	2	202112698	202113199	501	+	0.554152	0.524198	CASP8	ENSG00000064012	caspase 8, apoptosis-related cysteine peptidase [Source:HGNC Symbol;Acc:1509]	202098166	202152434	0	+	1.01606	utr	same
287	D1	L	2	204659253	204659754	501	+	0.194702	0.179725				0	NA	12387	NA	NA	NA	NA
300	D1	L	2	217497091	217497704	613	+	0	0	IGFBP2	ENSG00000115457	insulin-like growth factor binding protein 2, 36kDa [Source:HGNC Symbol;Acc:5471]	217497551	217529159	0	+	0.00261645	utr	same
320	D1	L	3	8796704	8797324	620	+	0	0	CAV3	ENSG00000182533	caveolin 3 [Source:HGNC Symbol;Acc:1529]	8775486	8883492	0	+	0.00647384	intron	same
322	D1	L	3	16336725	16337226	501	+	2.41131	2.32145	OXNAD1	ENSG00000154814	oxidoreductase NAD-binding domain containing 1 [Source:HGNC Symbol;Acc:25128]	16306706	16378822	0	+	3.13263	intron	same
324	D1	L	3	17247900	17248401	501	-	0.0748854	0.0599083	TBC1D5	ENSG00000131374	TBC1 domain family, member 5 [Source:HGNC Symbol;Acc:19166]	17199899	18486309	0	-	0.20408	intron	same
325	D1	L	3	17443431	17444051	620	+	0.0121071	0.0242142	TBC1D5	ENSG00000131374	TBC1 domain family, member 5 [Source:HGNC Symbol;Acc:19166]	17199899	18486309	0	-	0.20408	intron	opposite
326	D1	L	3	17443431	17444052	621	+	0.0120876	0.0241752	TBC1D5	ENSG00000131374	TBC1 domain family, member 5 [Source:HGNC Symbol;Acc:19166]	17199899	18486309	0	-	0.20408	intron	opposite
327	D1	L	3	17443431	17444053	622	+	0.0120682	0.0241364	TBC1D5	ENSG00000131374	TBC1 domain family, member 5 [Source:HGNC Symbol;Acc:19166]	17199899	18486309	0	-	0.20408	intron	opposite
328	D1	L	3	17443431	17444055	624	+	0.0120296	0.0240592	TBC1D5	ENSG00000131374	TBC1 domain family, member 5 [Source:HGNC Symbol;Acc:19166]	17199899	18486309	0	-	0.20408	intron	opposite
329	D1	L	3	17443432	17444058	626	+	0.0119912	0.0239824	TBC1D5	ENSG00000131374	TBC1 domain family, member 5 [Source:HGNC Symbol;Acc:19166]	17199899	18486309	0	-	0.20408	intron	opposite
330	D1	L	3	17443434	17444055	621	+	0.0120876	0.0241752	TBC1D5	ENSG00000131374	TBC1 domain family, member 5 [Source:HGNC Symbol;Acc:19166]	17199899	18486309	0	-	0.20408	intron	opposite
331	D1	L	3	17443436	17444052	616	+	0.0121856	0.0243711	TBC1D5	ENSG00000131374	TBC1 domain family, member 5 [Source:HGNC Symbol;Acc:19166]	17199899	18486309	0	-	0.20408	intron	opposite
332	D1	L	3	17443436	17444060	624	+	0.0120296	0.0240592	TBC1D5	ENSG00000131374	TBC1 domain family, member 5 [Source:HGNC Symbol;Acc:19166]	17199899	18486309	0	-	0.20408	intron	opposite
333	D1	L	3	17443549	17444050	501	-	0.0149771	0.0149771	TBC1D5	ENSG00000131374	TBC1 domain family, member 5 [Source:HGNC Symbol;Acc:19166]	17199899	18486309	0	-	0.20408	intron	same
334	D1	L	3	17443552	17444053	501	-	0.0149771	0.0149771	TBC1D5	ENSG00000131374	TBC1 domain family, member 5 [Source:HGNC Symbol;Acc:19166]	17199899	18486309	0	-	0.20408	intron	same
340	D1	L	3	43399717	43400218	501	+	0.61406	0.644014	SNRK	ENSG00000163788	SNF related kinase [Source:HGNC Symbol;Acc:30598]	43328004	43466256	0	+	0.756456	utr	same
341	D1	L	3	44378250	44378751	501	-	0.0149771	0.0149771	C3orf23	ENSG00000179152	chromosome 3 open reading frame 23 [Source:HGNC Symbol;Acc:25241]	44379611	44450943	860	+	0.0550188	NA	opposite
347	D1	L	3	49151299	49151909	610	+	3.60543	3.47007	USP19	ENSG00000172046	ubiquitin specific peptidase 19 [Source:HGNC Symbol;Acc:12617]	49145479	49158371	0	-	2.52035	exon	opposite
351	D1	L	3	51431891	51432504	613	+	2.24085	2.14289	RBM15B	ENSG00000179837	RNA binding motif protein 15B [Source:HGNC Symbol;Acc:24303]	51428731	51435330	0	+	3.68292	utr	same
353	D1	L	3	51838996	51839605	609	+	0	0				0	NA	4192	NA	NA	NA	NA
367	D1	L	3	74795626	74796239	613	+	0	0				0	NA	225335	NA	NA	NA	NA
372	D1	L	3	89906568	89907183	615	+	0	0				0	NA	172251	NA	NA	NA	NA
373	D1	L	3	97445507	97446008	501	-	0	0	EPHA6	ENSG00000080224	EPH receptor A6 [Source:HGNC Symbol;Acc:19296]	96533425	97471304	0	+	0.000529	intron	opposite
375	D1	L	3	101384019	101384641	622	+	6.32374	6.4927	ZBTB11	ENSG00000066422	zinc finger and BTB domain containing 11 [Source:HGNC Symbol;Acc:16740]	101367733	101396339	0	-	1.97246	exon	opposite
378	D1	L	3	107705329	107705947	618	+	0	0				0	NA	56198	NA	NA	NA	NA
379	D1	L	3	109193634	109194135	501	-	0	0	RP11-702L6.4	ENSG00000228980	No description	109128837	109214014	0	+	0.000883	utr	opposite
383	D1	L	3	116887150	116887772	622	+	0	0	LSAMP	ENSG00000185565	limbic system-associated membrane protein [Source:HGNC Symbol;Acc:6705]	115528641	117716095	0	-	0.00187322	intron	opposite
385	D1	L	3	121430156	121430775	619	+	0.109139	0.0970128	GOLGB1	ENSG00000173230	golgin B1 [Source:HGNC Symbol;Acc:4429]	121382046	121468602	0	-	0.690551	intron	opposite
393	D1	L	3	128611136	128611757	621	+	0.0604381	0.0483504	ACAD9	ENSG00000177646	acyl-CoA dehydrogenase family, member 9 [Source:HGNC Symbol;Acc:21497]	128598439	128634910	0	+	0.425069	intron	same
395	D1	L	3	134122990	134123491	501	+	0	0				0	NA	5395	NA	NA	NA	NA
396	D1	L	3	134967359	134967860	501	+	0	0	EPHB1	ENSG00000154928	EPH receptor B1 [Source:HGNC Symbol;Acc:3392]	134316643	134979309	0	+	0.001214	intron	same
406	D1	L	3	145645418	145645919	501	+	0	0				0	NA	11780	NA	NA	NA	NA
407	D1	L	3	148367033	148367690	657	+	0	0				0	NA	47881	NA	NA	NA	NA
409	D1	L	3	156297895	156298517	622	+	0	0				0	NA	24922	NA	NA	NA	NA
411	D1	L	3	164669221	164669846	625	+	0	0				0	NA	26840	NA	NA	NA	NA
415	D1	L	3	172109052	172109553	501	+	0.644014	0.584106	FNDC3B	ENSG00000075420	fibronectin type III domain containing 3B [Source:HGNC Symbol;Acc:24670]	171757418	172119455	0	+	0.100513	intron	same
417	D1	L	3	177686073	177686574	501	-	0	0				0	NA	30623	NA	NA	NA	NA
418	D1	L	3	182094658	182095273	615	+	0	0				0	NA	8614	NA	NA	NA	NA
419	D1	L	3	184548628	184549129	501	+	0.0149771	0.0149771	VPS8	ENSG00000156931	vacuolar protein sorting 8 homolog (S. cerevisiae) [Source:HGNC Symbol;Acc:29122]	184529931	184770402	0	+	0.192252	intron	same
420	D1	L	3	186100535	186101149	614	+	0	0				0	NA	20509	NA	NA	NA	NA
424	D1	L	3	189476564	189477184	620	+	0	0	TP63	ENSG00000073282	tumor protein p63 [Source:HGNC Symbol;Acc:15979]	189349205	189615068	0	+	0.00164021	intron	same
430	D1	L	3	197511613	197512226	613	+	0.685726	0.636745	FYTTD1	ENSG00000122068	forty-two-three domain containing 1 [Source:HGNC Symbol;Acc:25407]	197464050	197511317	296	+	0.810098	NA	same
434	D1	L	4	1249892	1250505	613	+	0.195922	0.195922	RP11-20I20.4	ENSG00000249548	No description	1246779	1259951	0	+	0.142117	utr	same
440	D1	L	4	6602703	6603315	612	+	0.220771	0.245302	MAN2B2	ENSG00000013288	mannosidase, alpha, class 2B, member 2 [Source:HGNC Symbol;Acc:29623]	6576902	6625089	0	+	0.753285	intron	same
443	D1	L	4	10507802	10508413	611	+	0.0368554	0.0122851	CLNK	ENSG00000109684	cytokine-dependent hematopoietic cell linker [Source:HGNC Symbol;Acc:17438]	10488019	10686489	0	-	0.00530349	intron	opposite
444	D1	L	4	15121938	15122439	501	-	0	0	RP11-665G4.1	ENSG00000249252	No description	15006566	15429538	0	-	0.0191618	utr	same
445	D1	L	4	16332766	16333381	615	+	0	0				0	NA	68672	NA	NA	NA	NA
448	D1	L	4	31524521	31525141	620	+	0	0	RP11-665I14.1	ENSG00000249882	No description	31508288	31560443	0	+	0.000144	utr	same
449	D1	L	4	33264505	33265006	501	+	0	0				0	NA	170126	NA	NA	NA	NA
450	D1	L	4	34806554	34807167	613	+	0	0				0	NA	135500	NA	NA	NA	NA
454	D1	L	4	44383032	44383652	620	+	0	0	KCTD8	ENSG00000183783	potassium channel tetramerisation domain containing 8 [Source:HGNC Symbol;Acc:22394]	44175926	44450824	0	-	0.000602	intron	opposite
456	D1	L	4	53611747	53612360	613	+	0	0	ERVMER34-1	ENSG00000226887	endogenous retrovirus group MER34, member 1 [Source:HGNC Symbol;Acc:42970]	53588785	53617807	0	-	0.00336769	utr	opposite
458	D1	L	4	56824757	56825258	501	-	0.479267	0.46429	CEP135	ENSG00000174799	centrosomal protein 135kDa [Source:HGNC Symbol;Acc:29086]	56815037	56899270	0	+	0.337214	intron	opposite
459	D1	L	4	57519315	57519965	650	+	0	0	HOPX	ENSG00000171476	HOP homeobox [Source:HGNC Symbol;Acc:24961]	57514155	57548065	0	-	0.00931193	intron	opposite
460	D1	L	4	62476630	62477238	608	+	0	0	LPHN3	ENSG00000150471	latrophilin 3 [Source:HGNC Symbol;Acc:20974]	62066976	62938184	0	+	0.000716	intron	same
464	D1	L	4	69285311	69285812	501	-	0	0				0	NA	27355	NA	NA	NA	NA
465	D1	L	4	69825824	69826434	610	+	0	0				0	NA	8315	NA	NA	NA	NA
468	D1	L	4	72527657	72528279	622	+	0	0.0120682				0	NA	79131	NA	NA	NA	NA
469	D1	L	4	72527774	72528275	501	-	0.0149771	0				0	NA	79135	NA	NA	NA	NA
470	D1	L	4	72527775	72528276	501	-	0.0149771	0				0	NA	79134	NA	NA	NA	NA
472	D1	L	4	75860657	75861274	617	+	0	0	PARM1	ENSG00000169116	prostate androgen-regulated mucin-like protein 1 [Source:HGNC Symbol;Acc:24536]	75858305	75975325	0	+	0.00134923	intron	same
474	D1	L	4	80813174	80813796	622	+	0	0				0	NA	8507	NA	NA	NA	NA
477	D1	L	4	87742007	87742623	616	+	0.0243711	0.0243711	SLC10A6	ENSG00000145283	solute carrier family 10 (sodium/bile acid cotransporter family), member 6 [Source:HGNC Symbol;Acc:30603]	87744621	87770416	1998	-	0.00349752	NA	opposite
487	D1	L	4	104105549	104106050	501	+	0.0149771	0.0149771	CENPE	ENSG00000138778	centromere protein E, 312kDa [Source:HGNC Symbol;Acc:1856]	104026963	104119566	0	-	0.0094992	intron	opposite
489	D1	L	4	108858520	108859174	654	+	0.160701	0.137743	RP11-286E11.1	ENSG00000245293	No description	108784635	108899955	0	-	0.0440074	intron	opposite
505	D1	L	4	127260230	127260731	501	+	0	0				0	NA	223043	NA	NA	NA	NA
519	D1	L	4	147936667	147937285	618	+	0	0				0	NA	40058	NA	NA	NA	NA
525	D1	L	4	161776969	161777581	612	+	0	0				0	NA	147448	NA	NA	NA	NA
527	D1	L	4	169217071	169217693	622	+	0	0	DDX60	ENSG00000137628	DEAD (Asp-Glu-Ala-Asp) box polypeptide 60 [Source:HGNC Symbol;Acc:25942]	169137444	169239958	0	-	0.173083	intron	opposite
531	D1	L	4	173610609	173611223	614	+	0	0	GALNTL6	ENSG00000174473escription=UDP-N-acetyl-alpha-D-galactosamine:polypeptideN-acetylgalactosaminyltransferase-like 6 [Source:HGNCSymbol;Acc:33844]	No description	172733405	173962710	0	+	0.000471	intron	same
534	D1	L	4	175879190	175879807	617	+	0	0	ADAM29	ENSG00000168594	ADAM metallopeptidase domain 29 [Source:HGNC Symbol;Acc:207]	175750819	175899331	0	+	0.000506	utr	same
550	D1	L	5	7201872	7202481	609	+	0	0				0	NA	10947	NA	NA	NA	NA
552	D1	L	5	13903633	13904134	501	-	0	0	DNAH5	ENSG00000039139	dynein, axonemal, heavy chain 5 [Source:HGNC Symbol;Acc:2950]	13690440	13944652	0	-	0.000296	intron	same
557	D1	L	5	20357354	20357967	613	+	0	0	CDH18	ENSG00000145526	cadherin 18, type 2 [Source:HGNC Symbol;Acc:1757]	19473060	20575982	0	-	0.000798	utr	opposite
575	D1	L	5	57227873	57228483	610	+	0	0				0	NA	32884	NA	NA	NA	NA
576	D1	L	5	58537903	58538523	620	+	0	0	PDE4D	ENSG00000113448	phosphodiesterase 4D, cAMP-specific [Source:HGNC Symbol;Acc:8783]	58264865	59817947	0	-	0.0564414	intron	opposite
577	D1	L	5	64866040	64866655	615	+	1.01304	1.04966	PPWD1	ENSG00000113593	peptidylprolyl isomerase domain and WD repeat containing 1 [Source:HGNC Symbol;Acc:28954]	64859063	64883376	0	+	3.16059	intron	same
581	D1	L	5	75907809	75908422	613	+	0.0367353	0.0979608	IQGAP2	ENSG00000145703	IQ motif containing GTPase activating protein 2 [Source:HGNC Symbol;Acc:6111]	75699074	76003957	0	+	0.246824	intron	same
582	D1	L	5	76670376	76670993	617	+	0	0	PDE8B	ENSG00000113231	phosphodiesterase 8B [Source:HGNC Symbol;Acc:8794]	76506274	76725632	0	+	0.00253634	intron	same
583	D1	L	5	76670488	76670989	501	-	0	0	PDE8B	ENSG00000113231	phosphodiesterase 8B [Source:HGNC Symbol;Acc:8794]	76506274	76725632	0	+	0.00253634	intron	opposite
584	D1	L	5	76670489	76670990	501	-	0	0	PDE8B	ENSG00000113231	phosphodiesterase 8B [Source:HGNC Symbol;Acc:8794]	76506274	76725632	0	+	0.00253634	intron	opposite
585	D1	L	5	76670490	76670991	501	-	0	0	PDE8B	ENSG00000113231	phosphodiesterase 8B [Source:HGNC Symbol;Acc:8794]	76506274	76725632	0	+	0.00253634	intron	opposite
591	D1	L	5	86756252	86756871	619	+	0	0				0	NA	39988	NA	NA	NA	NA
600	D1	L	5	110359178	110359792	614	+	0	0				0	NA	14580	NA	NA	NA	NA
605	D1	L	5	122202407	122203026	619	+	0	0	SNX24	ENSG00000064652	sorting nexin 24 [Source:HGNC Symbol;Acc:21533]	122179134	122365049	0	+	0.0133453	intron	same
606	D1	L	5	122307605	122308225	620	+	0	0	SNX24	ENSG00000064652	sorting nexin 24 [Source:HGNC Symbol;Acc:21533]	122179134	122365049	0	+	0.0133453	intron	same
607	D1	L	5	122922180	122922681	501	-	0.0599083	0.0748854	CSNK1G3	ENSG00000151292	casein kinase 1, gamma 3 [Source:HGNC Symbol;Acc:2456]	122847793	122952739	0	+	0.137622	intron	opposite
622	D1	L	5	134015567	134016185	618	+	0.0364386	0.0364386	SEC24A	ENSG00000113615	SEC24 family, member A (S. cerevisiae) [Source:HGNC Symbol;Acc:10703]	133984479	134063513	0	+	0.189782	intron	same
633	D1	L	5	157241698	157242199	501	-	0.0149771	0.0149771	CLINT1	ENSG00000113282	clathrin interactor 1 [Source:HGNC Symbol;Acc:23186]	157212751	157286183	0	-	0.636123	intron	same
636	D1	L	5	162590286	162590899	613	+	0	0	RP11-541P9.3	ENSG00000250061	No description	162439271	162864332	0	-	0.00320153	utr	opposite
660	D1	L	6	3361716	3362331	615	+	0.0244107	0.036616	SLC22A23	ENSG00000137266	solute carrier family 22, member 23 [Source:HGNC Symbol;Acc:21106]	3269196	3457256	0	-	0.217486	intron	opposite
662	D1	L	6	5542122	5542623	501	+	0	0.0149771	FARS2	ENSG00000145982	phenylalanyl-tRNA synthetase 2, mitochondrial [Source:HGNC Symbol;Acc:21062]	5261584	5771816	0	+	0.101542	intron	same
663	D1	L	6	5668391	5668892	501	+	0.0898625	0.0898625	FARS2	ENSG00000145982	phenylalanyl-tRNA synthetase 2, mitochondrial [Source:HGNC Symbol;Acc:21062]	5261584	5771816	0	+	0.101542	intron	same
689	D1	L	6	32151038	32151539	501	+	2.17168	2.56108	RNF5	ENSG00000204308	ring finger protein 5 [Source:HGNC Symbol;Acc:10068]	32146131	32151930	0	+	1.27555	exon	same
691	D1	L	6	32931544	32932159	615	+	0.134259	0.109848	HLA-DMA	ENSG00000204257	major histocompatibility complex, class II, DM alpha [Source:HGNC Symbol;Acc:4934]	32916390	32938493	0	-	0.381299	utr	opposite
701	D1	L	6	37052571	37053193	622	+	0	0				0	NA	39394	NA	NA	NA	NA
711	D1	L	6	43913922	43914423	501	+	0	0				0	NA	49037	NA	NA	NA	NA
712	D1	L	6	44583536	44584037	501	+	0	0				0	NA	89045	NA	NA	NA	NA
714	D1	L	6	45316842	45317455	613	+	0.0489804	0.0489804	SUPT3H	ENSG00000196284	suppressor of Ty 3 homolog (S. cerevisiae) [Source:HGNC Symbol;Acc:11466]	44777054	45345690	0	-	0.0672337	intron	opposite
720	D1	L	6	73222128	73222629	501	+	0.0149771	0				0	NA	25654	NA	NA	NA	NA
728	D1	L	6	94645550	94646169	619	+	0	0				0	NA	46422	NA	NA	NA	NA
732	D1	L	6	100911097	100911717	620	+	0	0	SIM1	ENSG00000112246	single-minded homolog 1 (Drosophila) [Source:HGNC Symbol;Acc:10882]	100832891	100912805	0	-	0.000282	exon	opposite
733	D1	L	6	100911212	100911713	501	-	0	0	SIM1	ENSG00000112246	single-minded homolog 1 (Drosophila) [Source:HGNC Symbol;Acc:10882]	100832891	100912805	0	-	0.000282	exon	same
734	D1	L	6	100911213	100911714	501	-	0	0	SIM1	ENSG00000112246	single-minded homolog 1 (Drosophila) [Source:HGNC Symbol;Acc:10882]	100832891	100912805	0	-	0.000282	exon	same
735	D1	L	6	101270936	101271437	501	-	0.0449312	0.0449312	ASCC3	ENSG00000112249	activating signal cointegrator 1 complex subunit 3 [Source:HGNC Symbol;Acc:18697]	100956070	101329248	0	-	0.120742	intron	same
736	D1	L	6	102332361	102332862	501	+	0	0	GRIK2	ENSG00000164418	glutamate receptor, ionotropic, kainate 2 [Source:HGNC Symbol;Acc:4580]	101846664	102517958	0	+	0.000426	intron	same
742	D1	L	6	111744646	111745262	616	+	0.0974845	0.10967	REV3L	ENSG00000009413	REV3-like, catalytic subunit of DNA polymerase zeta (yeast) [Source:HGNC Symbol;Acc:9968]	111620234	111804918	0	-	0.3269	intron	opposite
743	D1	L	6	112060475	112060976	501	+	0.389404	0.389404	FYN	ENSG00000010810	FYN oncogene related to SRC, FGR, YES [Source:HGNC Symbol;Acc:4037]	111981535	112194655	0	-	1.41726	utr	opposite
749	D1	L	6	133068220	133068833	613	+	0.0244902	0.0244902	VNN2	ENSG00000112303	vanin 2 [Source:HGNC Symbol;Acc:12706]	133065009	133084598	0	-	0.716541	intron	opposite
752	D1	L	6	136583338	136583959	621	+	0.628556	0.664819	BCLAF1	ENSG00000029363	BCL2-associated transcription factor 1 [Source:HGNC Symbol;Acc:16863]	136578001	136610989	0	-	2.18998	intron	opposite
753	D1	L	6	138072832	138073333	501	-	0	0				0	NA	12712	NA	NA	NA	NA
757	D1	L	6	142727814	142728315	501	+	0	0	GPR126	ENSG00000112414	G protein-coupled receptor 126 [Source:HGNC Symbol;Acc:13841]	142622991	142767403	0	+	0.00281137	intron	same
758	D1	L	6	143360942	143361443	501	-	0.0599083	0.0748854	RP1-45I4.3	ENSG00000227192	No description	143360562	143363461	0	-	0.0518517	utr	same
765	D1	L	6	149615378	149615879	501	+	0	0	TAB2	ENSG00000055208	TGF-beta activated kinase 1/MAP3K7 binding protein 2 [Source:HGNC Symbol;Acc:17075]	149539777	149732749	0	+	0.319133	intron	same
766	D1	L	6	157171798	157172420	622	+	0.181023	0.181023	ARID1B	ENSG00000049618	AT rich interactive domain 1B (SWI1-like) [Source:HGNC Symbol;Acc:18040]	157099063	157530401	0	+	0.329072	intron	same
768	D1	L	6	158303845	158304465	620	+	1.76763	1.8887	SNX9	ENSG00000130340	sorting nexin 9 [Source:HGNC Symbol;Acc:14973]	158244281	158366109	0	+	1.43959	intron	same
770	D1	L	6	159389043	159389544	501	+	0.0449312	0.0599083				0	NA	7768	NA	NA	NA	NA
772	D1	L	6	163897417	163898046	629	+	0.0954729	0.0716047	QKI	ENSG00000112531	QKI, KH domain containing, RNA binding [Source:HGNC Symbol;Acc:21100]	163835032	163999628	0	+	0.175861	intron	same
773	D1	L	6	163897531	163898032	501	-	0.0898625	0.10484	QKI	ENSG00000112531	QKI, KH domain containing, RNA binding [Source:HGNC Symbol;Acc:21100]	163835032	163999628	0	+	0.175861	intron	opposite
774	D1	L	6	165149758	165150394	636	+	0	0				0	NA	90845	NA	NA	NA	NA
776	D1	L	6	166706687	166707188	501	+	0	0				0	NA	11980	NA	NA	NA	NA
779	D1	L	6	168817739	168818352	613	+	0	0				0	NA	23479	NA	NA	NA	NA
780	D1	L	6	170751819	170752320	501	-	0	0				0	NA	35666	NA	NA	NA	NA
782	D1	L	7	4206389	4206890	501	+	0.0149771	0	SDK1	ENSG00000146555	sidekick homolog 1, cell adhesion molecule (chicken) [Source:HGNC Symbol;Acc:19307]	3341080	4308632	0	+	0.00937915	intron	same
783	D1	L	7	4429836	4430458	622	+	0	0				0	NA	121204	NA	NA	NA	NA
786	D1	L	7	7762027	7762637	610	+	0.676787	0.689093	AC006465.3	ENSG00000219545	HCG19535Hypothetical gene supported by AK027125Uncharacterized proteincDNA FLJ54628 [Source:UniProtKB/TrEMBL;Acc:A4D104]	7680342	8043689	0	+	0.168104	intron	same
789	D1	L	7	10950715	10951325	610	+	0	0				0	NA	9014	NA	NA	NA	NA
799	D1	L	7	17520927	17521547	620	+	0	0	AC017060.1	ENSG00000226598	No description	17503069	17598533	0	-	0.000788	utr	opposite
800	D1	L	7	23046924	23047528	604	+	0	0	FAM126A	ENSG00000122591	family with sequence similarity 126, member A [Source:HGNC Symbol;Acc:24587]	22980878	23053749	0	-	0.103896	intron	opposite
801	D1	L	7	24252129	24252630	501	+	0	0	AC004485.3	ENSG00000228944	No description	24236281	24295338	0	-	0.00127307	utr	opposite
803	D1	L	7	26583717	26584325	608	+	0	0				0	NA	5310	NA	NA	NA	NA
805	D1	L	7	27826398	27826899	501	+	0.0449312	0.0449312	TAX1BP1	ENSG00000106052	Tax1 (human T-cell leukemia virus type I) binding protein 1 [Source:HGNC Symbol;Acc:11575]	27778950	27880938	0	+	0.430886	intron	same
807	D1	L	7	31299793	31300406	613	+	0	0				0	NA	56206	NA	NA	NA	NA
808	D1	L	7	33096148	33096649	501	+	0.119817	0.0748854	NT5C3	ENSG00000122643	5'-nucleotidase, cytosolic III [Source:HGNC Symbol;Acc:17820]	33053742	33102409	0	-	0.434567	intron	opposite
811	D1	L	7	36086448	36086949	501	-	0.0149771	0.0149771	AC083864.3	ENSG00000232930	No description	36069221	36095041	0	+	0.00174706	utr	opposite
817	D1	L	7	40127026	40127527	501	-	0.0599083	0.0149771	CDK13	ENSG00000065883	cyclin-dependent kinase 13 [Source:HGNC Symbol;Acc:1733]	39989636	40136733	0	+	0.573274	intron	opposite
819	D1	L	7	45433614	45434234	620	+	0	0				0	NA	66077	NA	NA	NA	NA
822	D1	L	7	52454702	52455203	501	-	0	0				0	NA	63117	NA	NA	NA	NA
823	D1	L	7	53994417	53994918	501	-	0	0	RP11-806J6.1	ENSG00000238131	No description	53994369	54015437	0	-	0.000357	utr	same
839	D1	L	7	81953420	81954031	611	+	0	0	CACNA2D1	ENSG00000153956	calcium channel, voltage-dependent, alpha 2/delta subunit 1 [Source:HGNC Symbol;Acc:1399]	81575760	82073114	0	-	0.000438	intron	opposite
840	D1	L	7	82641160	82641661	501	-	0	0	PCLO	ENSG00000186472	piccolo (presynaptic cytomatrix protein) [Source:HGNC Symbol;Acc:13406]	82383321	82792246	0	-	0.000276	intron	same
861	D1	L	7	106683215	106683716	501	-	0	0	PRKAR2B	ENSG00000005249	protein kinase, cAMP-dependent, regulatory, type II, beta [Source:HGNC Symbol;Acc:9392]	106685094	106802256	1378	+	0.0129626	NA	opposite
863	D1	L	7	109538355	109538856	501	+	0	0				0	NA	301132	NA	NA	NA	NA
871	D1	L	7	131872568	131873069	501	+	0	0	PLXNA4	ENSG00000221866	plexin A4 [Source:HGNC Symbol;Acc:9102]	131808091	132333447	0	-	0.00575311	intron	opposite
872	D1	L	7	135639476	135639977	501	+	0.0449312	0.0449312	MTPN	ENSG00000105887	myotrophin [Source:HGNC Symbol;Acc:15667]	135611509	135662101	0	-	0.474206	intron	opposite
881	D1	L	7	144650839	144651340	501	-	0	0				0	NA	103662	NA	NA	NA	NA
882	D1	L	7	146437069	146437570	501	+	0	0	CNTNAP2	ENSG00000174469	contactin associated protein-like 2 [Source:HGNC Symbol;Acc:13830]	145813453	148118090	0	+	0.00062	intron	same
884	D1	L	7	149101518	149102019	501	-	0	0	AC004941.1	ENSG00000243632	No description	149103155	149103226	1136	-	0	NA	same
889	D1	L	7	151616926	151617548	622	+	0	0				0	NA	3423	NA	NA	NA	NA
890	D1	L	7	151617043	151617544	501	-	0	0				0	NA	3540	NA	NA	NA	NA
896	D1	L	7	156433550	156434163	613	+	0.110206	0.0857157	RNF32	ENSG00000105982	ring finger protein 32 [Source:HGNC Symbol;Acc:17118]	156432975	156469824	0	+	0.555369	utr	same
904	D1	L	8	8874709	8875328	619	+	0.060633	0.060633	ERI1	ENSG00000104626	exoribonuclease 1 [Source:HGNC Symbol;Acc:23994]	8859657	8974256	0	+	0.0383141	intron	same
906	D1	L	8	11020698	11021318	620	+	0.242142	0.302677	XKR6	ENSG00000171044	XK, Kell blood group complex subunit-related family, member 6 [Source:HGNC Symbol;Acc:27806]	10753555	11058875	0	-	0.100026	intron	opposite
909	D1	L	8	19379998	19380499	501	+	0.344473	0.329496	CSGALNACT1	ENSG00000147408	chondroitin sulfate N-acetylgalactosaminyltransferase 1 [Source:HGNC Symbol;Acc:24290]	19261672	19615540	0	-	0.402941	utr	opposite
910	D1	L	8	19379998	19380611	613	+	0.318373	0.330618	CSGALNACT1	ENSG00000147408	chondroitin sulfate N-acetylgalactosaminyltransferase 1 [Source:HGNC Symbol;Acc:24290]	19261672	19615540	0	-	0.402941	utr	opposite
913	D1	L	8	27399346	27399847	501	-	0.164748	0.25461	EPHX2	ENSG00000120915	epoxide hydrolase 2, cytoplasmic [Source:HGNC Symbol;Acc:3402]	27348296	27403081	0	+	0.669289	intron	opposite
916	D1	L	8	31982799	31983412	613	+	0	0	NRG1	ENSG00000157168	neuregulin 1 [Source:HGNC Symbol;Acc:7997]	31496902	32622548	0	+	0.000367	intron	same
923	D1	L	8	47486913	47487414	501	+	0	0				0	NA	246445	NA	NA	NA	NA
929	D1	L	8	61517030	61517643	613	+	0.967363	0.869402	RAB2A	ENSG00000104388	RAB2A, member RAS oncogene family [Source:HGNC Symbol;Acc:9763]	61429416	61536186	0	+	0.635513	intron	same
932	D1	L	8	71751733	71752234	501	+	0.0149771	0.0149771				0	NA	49127	NA	NA	NA	NA
941	D1	L	8	86545466	86546088	622	+	0	0				0	NA	22607	NA	NA	NA	NA
944	D1	L	8	98157356	98157973	617	+	0.206819	0.218985	PGCP	ENSG00000104324	Plasma glutamate carboxypeptidase [Source:UniProtKB/Swiss-Prot;Acc:Q9Y646]	97657455	98161882	0	+	0.0364725	utr	same
945	D1	L	8	100142295	100142796	501	-	0.10484	0.119817	VPS13B	ENSG00000132549	vacuolar protein sorting 13 homolog B (yeast) [Source:HGNC Symbol;Acc:2183]	100025494	100889808	0	+	0.137276	intron	opposite
953	D1	L	8	105353698	105354199	501	-	0	0	KB-1552D7.2	ENSG00000254191	No description	105342552	105431140	0	-	0.000509	utr	same
954	D1	L	8	106753176	106753796	620	+	0	0	ZFPM2	ENSG00000169946	zinc finger protein, multitype 2 [Source:HGNC Symbol;Acc:16700]	106330920	106816760	0	+	0.000449	intron	same
958	D1	L	8	117314872	117315373	501	-	0	0	AF130342.1	ENSG00000249917	No description	116962736	117337297	0	-	0.000261	utr	same
962	D1	L	8	118721331	118721950	619	+	0	0				0	NA	84779	NA	NA	NA	NA
963	D1	L	8	122307099	122307600	501	-	0	0				0	NA	107967	NA	NA	NA	NA
965	D1	L	8	126458244	126458864	620	+	0.0121071	0				0	NA	7597	NA	NA	NA	NA
972	D1	L	8	138432992	138433493	501	+	0	0				0	NA	315291	NA	NA	NA	NA
977	D1	L	8	145658397	145659019	622	+	0.20516	0.181023	TONSL	ENSG00000160949	tonsoku-like, DNA repair protein [Source:HGNC Symbol;Acc:7801]	145654165	145669827	0	-	0.170406	exon	opposite
982	D1	L	9	2018277	2018778	501	-	0.853694	0.778808	SMARCA2	ENSG00000080503	SWI/SNF related, matrix associated, actin dependent regulator of chromatin, subfamily a, member 2 [Source:HGNC Symbol;Acc:11098]	2015342	2193624	0	+	0.64413	utr	opposite
985	D1	L	9	10604970	10605588	618	+	0	0	PTPRD	ENSG00000153707	protein tyrosine phosphatase, receptor type, D [Source:HGNC Symbol;Acc:9668]	8314246	10612723	0	-	0.000599	utr	opposite
986	D1	L	9	10605083	10605584	501	-	0	0	PTPRD	ENSG00000153707	protein tyrosine phosphatase, receptor type, D [Source:HGNC Symbol;Acc:9668]	8314246	10612723	0	-	0.000599	utr	same
987	D1	L	9	11847234	11847852	618	+	0	0				0	NA	250808	NA	NA	NA	NA
988	D1	L	9	12460697	12461198	501	-	0	0				0	NA	160246	NA	NA	NA	NA
989	D1	L	9	14803287	14803909	622	+	0	0	FREM1	ENSG00000164946	FRAS1 related extracellular matrix 1 [Source:HGNC Symbol;Acc:23399]	14734664	14910993	0	-	0.000981	intron	opposite
991	D1	L	9	21947478	21947979	501	+	0.179725	0.149771	MTAP	ENSG00000099810	methylthioadenosine phosphorylase [Source:HGNC Symbol;Acc:7413]	21802635	22032985	0	+	0.125694	intron	same
996	D1	L	9	27736307	27736808	501	+	0	0				0	NA	13057	NA	NA	NA	NA
997	D1	L	9	32880137	32880638	501	+	0	0.0149771				0	NA	38377	NA	NA	NA	NA
998	D1	L	9	32977134	32977635	501	+	0.344473	0.224656	APTX	ENSG00000137074	aprataxin [Source:HGNC Symbol;Acc:15984]	32972604	33025166	0	-	0.304098	intron	opposite
1003	D1	L	9	75303446	75304068	622	+	0	0	TMC1	ENSG00000165091	transmembrane channel-like 1 [Source:HGNC Symbol;Acc:16513]	75136717	75455695	0	+	0.00190921	exon	same
1005	D1	L	9	78720106	78720607	501	-	0.0748854	0.0599083	PCSK5	ENSG00000099139	proprotein convertase subtilisin/kexin type 5 [Source:HGNC Symbol;Acc:8747]	78505560	78977255	0	+	0.0904714	intron	opposite
1010	D1	L	9	88576768	88577269	501	-	1.2431	1.09333	NAA35	ENSG00000135040	N(alpha)-acetyltransferase 35, NatC auxiliary subunit [Source:HGNC Symbol;Acc:24340]	88556061	88637213	0	+	0.253572	exon	opposite
1011	D1	L	9	91206921	91207422	501	-	0	0				0	NA	7732	NA	NA	NA	NA
1013	D1	L	9	92250541	92251042	501	-	0	0				0	NA	29071	NA	NA	NA	NA
1023	D1	L	9	103589349	103589962	613	+	0	0				0	NA	201029	NA	NA	NA	NA
1027	D1	L	9	105299059	105299560	501	-	0	0	C9orf107	ENSG00000204250	chromosome 9 open reading frame 107 [Source:HGNC Symbol;Acc:31372]	105281918	105419796	0	+	0.000273	utr	opposite
1031	D1	L	9	113490676	113491296	620	+	0	0	MUSK	ENSG00000030304	muscle, skeletal, receptor tyrosine kinase [Source:HGNC Symbol;Acc:7525]	113431051	113563859	0	+	0.000623	exon	same
1034	D1	L	9	119403997	119404498	501	-	0	0	ASTN2	ENSG00000148219	astrotactin 2 [Source:HGNC Symbol;Acc:17021]	119187504	120177348	0	-	0.012829	intron	same
1036	D1	L	9	124645445	124645946	501	-	0	0	TTLL11	ENSG00000175764	tubulin tyrosine ligase-like family, member 11 [Source:HGNC Symbol;Acc:18113]	124584207	124855885	0	-	0.0136711	intron	same
1039	D1	L	9	130125466	130126079	613	+	0.0244902	0.0489804	GARNL3	ENSG00000136895	GTPase activating Rap/RanGAP domain-like 3 [Source:HGNC Symbol;Acc:25425]	129986544	130155939	0	+	0.0102971	intron	same
1042	D1	L	9	131480549	131481171	622	+	0.0965457	0.120682	PKN3	ENSG00000160447	protein kinase N3 [Source:HGNC Symbol;Acc:17999]	131464802	131483197	0	+	0.0633489	exon	same
1053	D1	L	9	140107483	140108095	612	+	2.94362	3.25025	NDOR1	ENSG00000188566	NADPH dependent diflavin oxidoreductase 1 [Source:HGNC Symbol;Acc:29838]	140100119	140113813	0	+	2.03348	intron	same
1067	D1	L	10	7265397	7266019	622	+	0.362046	0.422387	SFMBT2	ENSG00000198879	Scm-like with four mbt domains 2 [Source:HGNC Symbol;Acc:20256]	7200586	7453450	0	-	0.528746	intron	opposite
1073	D1	L	10	9594998	9595499	501	-	0	0.0149771				0	NA	205247	NA	NA	NA	NA
1076	D1	L	10	17619247	17619748	501	+	0.883648	0.943556				0	NA	12210	NA	NA	NA	NA
1082	D1	L	10	42400269	42400770	501	-	0.0149771	0				0	NA	502846	NA	NA	NA	NA
1086	D1	L	10	52197107	52197717	610	+	0.196884	0.221494	SGMS1	ENSG00000198964	sphingomyelin synthase 1 [Source:HGNC Symbol;Acc:29799]	52065346	52384795	0	-	0.104522	intron	opposite
1088	D1	L	10	53051745	53052433	688	+	0.0109122	0.0109122	PRKG1	ENSG00000185532	protein kinase, cGMP-dependent, type I [Source:HGNC Symbol;Acc:9414]	52750945	54058110	0	+	0.0158288	intron	same
1091	D1	L	10	58604587	58605200	613	+	0	0				0	NA	248796	NA	NA	NA	NA
1094	D1	L	10	60347355	60347856	501	-	0	0	BICC1	ENSG00000122870	bicaudal C homolog 1 (Drosophila) [Source:HGNC Symbol;Acc:19351]	60272900	60591195	0	+	0.0012283	intron	opposite
1095	D1	L	10	61533371	61533872	501	-	0	0				0	NA	14649	NA	NA	NA	NA
1101	D1	L	10	64440930	64441560	630	+	0	0				0	NA	9159	NA	NA	NA	NA
1103	D1	L	10	72637620	72638234	614	+	1.5526	1.16139	SGPL1	ENSG00000166224	sphingosine-1-phosphate lyase 1 [Source:HGNC Symbol;Acc:10817]	72575717	72640930	0	+	0.261823	utr	same
1104	D1	L	10	72923591	72924205	614	+	0	0				0	NA	48122	NA	NA	NA	NA
1112	D1	L	10	77197478	77198122	644	+	0	0	C10orf11	ENSG00000148655	chromosome 10 open reading frame 11 [Source:HGNC Symbol;Acc:23405]	77191211	78318978	0	+	0.00175334	intron	same
1113	D1	L	10	79586890	79587391	501	-	0.0149771	0.0149771	DLG5	ENSG00000151208	discs, large homolog 5 (Drosophila) [Source:HGNC Symbol;Acc:2904]	79550549	79686378	0	-	0.00575663	intron	same
1115	D1	L	10	83425234	83425856	622	+	0	0				0	NA	209214	NA	NA	NA	NA
1119	D1	L	10	91120475	91120976	501	-	0	0	LIPA	ENSG00000107798	lipase A, lysosomal acid, cholesterol esterase [Source:HGNC Symbol;Acc:6617]	90973326	91174382	0	-	0.101452	intron	same
1120	D1	L	10	96206736	96207355	619	+	0	0	TBC1D12	ENSG00000108239	TBC1 domain family, member 12 [Source:HGNC Symbol;Acc:29082]	96162261	96295687	0	+	0.00236666	intron	same
1121	D1	L	10	96739003	96739625	622	+	0	0	CYP2C9	ENSG00000138109	cytochrome P450, family 2, subfamily C, polypeptide 9 [Source:HGNC Symbol;Acc:2623]	96698415	96749447	0	+	0.000589	intron	same
1123	D1	L	10	100681532	100682145	613	+	0	0	HPSE2	ENSG00000172987	heparanase 2 [Source:HGNC Symbol;Acc:18374]	100218875	100995619	0	-	0.000803	intron	opposite
1124	D1	L	10	101953256	101953878	622	+	0.494797	0.506865	CHUK	ENSG00000213341	conserved helix-loop-helix ubiquitous kinase [Source:HGNC Symbol;Acc:1974]	101948055	101989376	0	-	0.24836	exon	opposite
1131	D1	L	10	114751412	114752034	622	+	0.0362046	0.0241364	TCF7L2	ENSG00000148737	transcription factor 7-like 2 (T-cell specific, HMG-box) [Source:HGNC Symbol;Acc:11641]	114710009	114927437	0	+	0.0400771	intron	same
1132	D1	L	10	115894504	115895123	619	+	1.20053	1.24904	C10orf118	ENSG00000165813	chromosome 10 open reading frame 118 [Source:HGNC Symbol;Acc:24349]	115880621	115933979	0	-	0.4895	exon	opposite
1135	D1	L	10	120486619	120487120	501	-	0.0299542	0.0299542	C10orf46	ENSG00000151893	chromosome 10 open reading frame 46 [Source:HGNC Symbol;Acc:23727]	120433679	120514761	0	-	0.323799	intron	same
1137	D1	L	10	122142442	122143062	620	+	0	0				0	NA	73404	NA	NA	NA	NA
1141	D1	L	10	128257435	128257936	501	-	0	0	C10orf90	ENSG00000154493	chromosome 10 open reading frame 90 [Source:HGNC Symbol;Acc:26563]	128113566	128359079	0	-	0.000398	intron	same
1144	D1	L	10	133064751	133065373	622	+	0	0	TCERG1L	ENSG00000176769	transcription elongation regulator 1-like [Source:HGNC Symbol;Acc:23533]	132890654	133109984	0	-	0.000823	intron	opposite
1145	D1	L	10	134344936	134345437	501	+	0.0299542	0.0149771				0	NA	5887	NA	NA	NA	NA
1150	D1	L	11	2572322	2572931	609	+	0.0123254	0.0246508	KCNQ1	ENSG00000053918	potassium voltage-gated channel, KQT-like subfamily, member 1 [Source:HGNC Symbol;Acc:6294]	2465914	2870221	0	+	0.124909	intron	same
1156	D1	L	11	3895380	3895881	501	-	0.823739	1.07835	STIM1	ENSG00000167323	stromal interaction molecule 1 [Source:HGNC Symbol;Acc:11386]	3875757	4114439	0	+	0.57522	intron	opposite
1159	D1	L	11	8332535	8333036	501	-	0	0				0	NA	42272	NA	NA	NA	NA
1163	D1	L	11	15710383	15710996	613	+	0	0	RP11-396O20.1	ENSG00000254695	No description	15665431	15726914	0	+	0.000489	utr	same
1166	D1	L	11	24879088	24879707	619	+	0	0	LUZP2	ENSG00000187398	leucine zipper protein 2 [Source:HGNC Symbol;Acc:23206]	24518516	25104150	0	+	0.000449	intron	same
1168	D1	L	11	27947891	27948511	620	+	0	0				0	NA	48696	NA	NA	NA	NA
1169	D1	L	11	31927447	31927948	501	-	0	0	RCN1	ENSG00000049449	reticulocalbin 1, EF-hand calcium binding domain [Source:HGNC Symbol;Acc:9934]	31833939	32127301	0	+	0.0193496	intron	opposite
1170	D1	L	11	32539904	32540405	501	+	0	0				0	NA	59589	NA	NA	NA	NA
1171	D1	L	11	33715652	33716153	501	-	0	0.0149771	RP4-541C22.5	ENSG00000255202	No description	33686766	33718247	0	-	0.00286583	utr	same
1174	D1	L	11	35773711	35774375	664	+	0.11306	0.135672	TRIM44	ENSG00000166326	tripartite motif containing 44 [Source:HGNC Symbol;Acc:19016]	35684353	35829775	0	+	0.261244	intron	same
1175	D1	L	11	36192618	36193295	677	+	0	0	LDLRAD3	ENSG00000179241	low density lipoprotein receptor class A domain containing 3 [Source:HGNC Symbol;Acc:27046]	35965531	36253686	0	+	0.00117413	intron	same
1189	D1	L	11	62556119	62556738	619	+	4.85064	4.52322	TMEM223	ENSG00000168569	transmembrane protein 223 [Source:HGNC Symbol;Acc:28464]	62539101	62559493	0	-	0.817364	exon	opposite
1198	D1	L	11	65351978	65352599	621	+	1.45051	2.36917	EHBP1L1	ENSG00000173442	EH domain binding protein 1-like 1 [Source:HGNC Symbol;Acc:30682]	65343509	65360121	0	+	2.01981	exon	same
1213	D1	L	11	66270219	66270836	617	+	0	0	DPP3	ENSG00000254986	dipeptidyl-peptidase 3 [Source:HGNC Symbol;Acc:3008]	66247484	66277130	0	+	0.164079	intron	same
1220	D1	L	11	66943449	66943950	501	-	0.239633	0.239633	KDM2A	ENSG00000173120	lysine (K)-specific demethylase 2A [Source:HGNC Symbol;Acc:13606]	66886740	67025141	0	+	0.885583	intron	opposite
1230	D1	L	11	69306386	69306998	612	+	0	0				0	NA	11678	NA	NA	NA	NA
1237	D1	L	11	73850234	73850735	501	+	0.688946	0.629037	C2CD3	ENSG00000168014	C2 calcium-dependent domain containing 3 [Source:HGNC Symbol;Acc:24564]	73723763	73882255	0	-	0.258676	exon	opposite
1244	D1	L	11	76163528	76164148	620	+	0.0605354	0.0605354	C11orf30	ENSG00000158636	chromosome 11 open reading frame 30 [Source:HGNC Symbol;Acc:18071]	76155967	76264069	0	+	0.214003	intron	same
1246	D1	L	11	78178745	78179246	501	+	0.0299542	0.0449312	NARS2	ENSG00000137513	asparaginyl-tRNA synthetase 2, mitochondrial (putative) [Source:HGNC Symbol;Acc:26274]	78147007	78285919	0	-	0.0680336	intron	opposite
1249	D1	L	11	83640960	83641578	618	+	0.0121462	0	DLG2	ENSG00000150672	discs, large homolog 2 (Drosophila) [Source:HGNC Symbol;Acc:2901]	83166055	85338966	0	-	0.0123975	exon	opposite
1258	D1	L	11	93583878	93584496	618	+	0	0.0121462	VSTM5	ENSG00000214376	V-set and transmembrane domain containing 5 [Source:HGNC Symbol;Acc:34443]	93551398	93583697	181	-	0.00325879	NA	opposite
1259	D1	L	11	94930729	94931230	501	-	2.32145	2.17168	RP11-712B9.2	ENSG00000245552	No description	94883703	94967268	0	+	1.65465	intron	opposite
1260	D1	L	11	94930897	94931398	501	-	2.30647	2.09679	RP11-712B9.2	ENSG00000245552	No description	94883703	94967268	0	+	1.65465	intron	opposite
1262	D1	L	11	95853447	95853948	501	-	1.42282	1.19817	MAML2	ENSG00000184384	mastermind-like 2 (Drosophila) [Source:HGNC Symbol;Acc:16259]	95709762	96076382	0	-	1.03532	intron	same
1265	D1	L	11	100829940	100830441	501	+	0	0	ARHGAP42	ENSG00000165895	Rho GTPase activating protein 42 [Source:HGNC Symbol;Acc:26545]	100558384	100861656	0	+	0.000545	intron	same
1266	D1	L	11	102160720	102161221	501	+	0	0				0	NA	23232	NA	NA	NA	NA
1279	D1	L	11	113889784	113890397	613	+	0	0				0	NA	28749	NA	NA	NA	NA
1281	D1	L	11	115387130	115387749	619	+	0	0				0	NA	11455	NA	NA	NA	NA
1286	D1	L	11	118008198	118008699	501	+	0	0.0149771	SCN4B	ENSG00000177098	sodium channel, voltage-gated, type IV, beta [Source:HGNC Symbol;Acc:10592]	118004092	118023603	0	-	0.000771	intron	opposite
1287	D1	L	11	118039952	118040574	622	+	0	0	SCN2B	ENSG00000149575	sodium channel, voltage-gated, type II, beta [Source:HGNC Symbol;Acc:10589]	118032666	118047388	0	-	0.00204265	intron	opposite
1289	D1	L	11	119206673	119207284	611	+	3.82067	3.86981	RNF26	ENSG00000173456	ring finger protein 26 [Source:HGNC Symbol;Acc:14646]	119205237	119208023	0	+	3.19947	exon	same
1290	D1	L	11	119760875	119761488	613	+	0	0				0	NA	97175	NA	NA	NA	NA
1291	D1	L	11	120653271	120653890	619	+	0	0	GRIK4	ENSG00000149403	glutamate receptor, ionotropic, kainate 4 [Source:HGNC Symbol;Acc:4582]	120382468	120859101	0	+	0.000962	intron	same
1299	D1	L	12	2947404	2947905	501	+	1.21314	1.2431	ITFG2	ENSG00000111203	integrin alpha FG-GAP repeat containing 2 [Source:HGNC Symbol;Acc:30879]	2921788	2968957	0	+	1.41747	utr	same
1305	D1	L	12	7096681	7097293	612	+	0.404748	0.343422	LPCAT3	ENSG00000111684	lysophosphatidylcholine acyltransferase 3 [Source:HGNC Symbol;Acc:30244]	7085348	7125814	0	-	0.65808	intron	opposite
1315	D1	L	12	46345230	46345731	501	-	1.90209	2.09679	SCAF11	ENSG00000139218	SR-related CTD-associated factor 11 [Source:HGNC Symbol;Acc:10784]	46312914	46385903	0	-	1.27533	exon	same
1320	D1	L	12	48523687	48524188	501	+	0.314519	0.494244	PFKM	ENSG00000152556	phosphofructokinase, muscle [Source:HGNC Symbol;Acc:8877]	48498922	48540187	0	+	0.217542	exon	same
1321	D1	L	12	49532402	49532903	501	+	0.0449312	0.0449312	RP11-386G11.10	ENSG00000258017	No description	49521565	49541652	0	+	0.413951	utr	same
1328	D1	L	12	52402462	52403080	618	+	3.19445	3.13372	GRASP	ENSG00000161835	GRP1 (general receptor for phosphoinositides 1)-associated scaffold protein [Source:HGNC Symbol;Acc:18707]	52400724	52409673	0	+	3.14265	exon	same
1332	D1	L	12	55744928	55745550	622	+	0	0				0	NA	13345	NA	NA	NA	NA
1334	D1	L	12	57357783	57358396	613	+	0.0612255	0.0367353				0	NA	4625	NA	NA	NA	NA
1336	D1	L	12	62633133	62633634	501	+	0.0599083	0.0599083	FAM19A2	ENSG00000198673	family with sequence similarity 19 (chemokine (C-C motif)-like), member A2 [Source:HGNC Symbol;Acc:21589]	62102040	62672931	0	-	0.0240348	intron	opposite
1337	D1	L	12	63202907	63203529	622	+	0	0	PPM1H	ENSG00000111110	protein phosphatase, Mg2+/Mn2+ dependent, 1H [Source:HGNC Symbol;Acc:18583]	63038367	63328817	0	-	0.00225205	intron	opposite
1341	D1	L	12	69142803	69143304	501	+	0.0748854	0.0599083	SLC35E3	ENSG00000175782	solute carrier family 35, member E3 [Source:HGNC Symbol;Acc:20864]	69139886	69187744	0	+	0.26298	intron	same
1343	D1	L	12	74756733	74757346	613	+	0	0	RP11-81H3.2	ENSG00000251138	No description	74526946	74796315	0	-	0.00256785	utr	opposite
1345	D1	L	12	77445830	77446448	618	+	0	0	E2F7	ENSG00000165891	E2F transcription factor 7 [Source:HGNC Symbol;Acc:23820]	77415027	77459360	0	-	0.00474845	intron	opposite
1346	D1	L	12	78455408	78456027	619	+	0	0	NAV3	ENSG00000067798	neuron navigator 3 [Source:HGNC Symbol;Acc:15998]	78224685	78606790	0	+	0.000374	intron	same
1354	D1	L	12	94603868	94604369	501	+	0.0149771	0.0149771	PLXNC1	ENSG00000136040	plexin C1 [Source:HGNC Symbol;Acc:9106]	94542499	94701451	0	+	0.151313	intron	same
1359	D1	L	12	96625837	96626450	613	+	0	0.0122451	ELK3	ENSG00000111145	ELK3, ETS-domain protein (SRF accessory protein 2) [Source:HGNC Symbol;Acc:3325]	96588160	96663613	0	+	0.477292	intron	same
1361	D1	L	12	100692278	100692899	621	+	0.0604381	0.0604381	SCYL2	ENSG00000136021	SCY1-like 2 (S. cerevisiae) [Source:HGNC Symbol;Acc:19286]	100660918	100735502	0	+	0.357251	intron	same
1381	D1	L	12	121700931	121701432	501	-	0.119817	0.179725	AC084018.1	ENSG00000214271	No description	0	NA	0	NA	NA	NA	NA
1394	D1	L	13	23946724	23947334	610	+	0.196884	0.172273	SACS	ENSG00000151835	spastic ataxia of Charlevoix-Saguenay (sacsin) [Source:HGNC Symbol;Acc:10519]	23902965	24007841	0	-	0.194491	intron	opposite
1395	D1	L	13	28285761	28286262	501	+	0	0				0	NA	44213	NA	NA	NA	NA
1398	D1	L	13	33900170	33900671	501	+	0	0				0	NA	7312	NA	NA	NA	NA
1399	D1	L	13	34123200	34123701	501	-	0	0	LINC00464	ENSG00000230490	long intergenic non-protein coding RNA 464 [Source:HGNC Symbol;Acc:42814]	33929343	34250905	0	-	0.00388126	utr	same
1400	D1	L	13	34680127	34680750	623	+	0	0				0	NA	5152	NA	NA	NA	NA
1401	D1	L	13	34680245	34680746	501	-	0	0				0	NA	5270	NA	NA	NA	NA
1413	D1	L	13	46653704	46654205	501	+	0	0	CPB2	ENSG00000080618	carboxypeptidase B2 (plasma) [Source:HGNC Symbol;Acc:2300]	46627321	46679161	0	-	0.00275557	intron	opposite
1417	D1	L	13	51992339	51992840	501	+	0.0149771	0.0299542	INTS6	ENSG00000102786	integrator complex subunit 6 [Source:HGNC Symbol;Acc:14879]	51928213	52028400	0	-	0.22333	intron	opposite
1419	D1	L	13	65237242	65237743	501	+	0	0				0	NA	587098	NA	NA	NA	NA
1421	D1	L	13	73489579	73490080	501	+	0.194702	0.179725	PIBF1	ENSG00000083535	progesterone immunomodulatory binding factor 1 [Source:HGNC Symbol;Acc:23352]	73356197	73590592	0	+	0.1956	intron	same
1424	D1	L	13	85422633	85423134	501	-	0	0				0	NA	216088	NA	NA	NA	NA
1425	D1	L	13	88666845	88667462	617	+	0	0				0	NA	127660	NA	NA	NA	NA
1426	D1	L	13	89214235	89214849	614	+	0	0				0	NA	16471	NA	NA	NA	NA
1433	D1	L	13	104853304	104853924	620	+	0	0				0	NA	773269	NA	NA	NA	NA
1434	D1	L	13	106506030	106506644	614	+	0	0				0	NA	43228	NA	NA	NA	NA
1435	D1	L	13	109767910	109768530	620	+	0	0	MYO16	ENSG00000041515	myosin XVI [Source:HGNC Symbol;Acc:29822]	109248500	109860355	0	+	0.00127795	intron	same
1440	D1	L	13	114133823	114134324	501	-	0.209679	0.164748	DCUN1D2	ENSG00000150401	DCN1, defective in cullin neddylation 1, domain containing 2 (S. cerevisiae) [Source:HGNC Symbol;Acc:20328]	114110134	114145267	0	-	0.442327	intron	same
1446	D1	L	14	21283997	21284719	722	+	0.010399	0				0	NA	12560	NA	NA	NA	NA
1447	D1	L	14	21284101	21284602	501	+	0	0				0	NA	12664	NA	NA	NA	NA
1448	D1	L	14	21284101	21284719	618	+	0.0121462	0				0	NA	12664	NA	NA	NA	NA
1449	D1	L	14	21284105	21284606	501	+	0	0				0	NA	12668	NA	NA	NA	NA
1456	D1	L	14	35700114	35700615	501	+	0.134794	0.224656	KIAA0391	ENSG00000100890	KIAA0391 [Source:HGNC Symbol;Acc:19958]	35591052	35743271	0	+	0.179096	intron	same
1459	D1	L	14	37247245	37247864	619	+	0	0	SLC25A21	ENSG00000183032	solute carrier family 25 (mitochondrial oxodicarboxylate carrier), member 21 [Source:HGNC Symbol;Acc:14411]	37147636	37642071	0	-	0.000304	intron	opposite
1460	D1	L	14	38320670	38321171	501	-	0	0	TTC6	ENSG00000139865	tetratricopeptide repeat domain 6 [Source:HGNC Symbol;Acc:19739]	38065052	38510647	0	+	0.000422	utr	opposite
1462	D1	L	14	42483640	42484262	622	+	0	0				0	NA	109888	NA	NA	NA	NA
1465	D1	L	14	52081486	52081987	501	-	0	0	FRMD6	ENSG00000139926	FERM domain containing 6 [Source:HGNC Symbol;Acc:19839]	51955818	52197445	0	+	0.00423177	utr	opposite
1466	D1	L	14	53327703	53328204	501	-	0	0.0149771	FERMT2	ENSG00000073712	fermitin family member 2 [Source:HGNC Symbol;Acc:15767]	53323986	53419153	0	-	0.0150895	exon	same
1467	D1	L	14	53416585	53417086	501	+	0.0149771	0.0149771	FERMT2	ENSG00000073712	fermitin family member 2 [Source:HGNC Symbol;Acc:15767]	53323986	53419153	0	-	0.0150895	intron	opposite
1472	D1	L	14	65488228	65488939	711	+	0.623021	0.612462	CHURC1-FNTB	ENSG00000125954	CHURC1-FNTB readthrough [Source:HGNC Symbol;Acc:42960]	65381203	65529368	0	+	0.677073	exon	same
1477	D1	L	14	70630699	70631338	639	+	0	0	SLC8A3	ENSG00000100678	solute carrier family 8 (sodium/calcium exchanger), member 3 [Source:HGNC Symbol;Acc:11070]	70510934	70655787	0	-	0.000934	intron	opposite
1481	D1	L	14	74392453	74392954	501	-	0.374427	0.35945	RP5-1021I20.4	ENSG00000258653	No description	74318674	74398981	0	+	0.301084	intron	opposite
1486	D1	L	14	89428343	89428844	501	-	0	0				0	NA	84008	NA	NA	NA	NA
1487	D1	L	14	90264276	90264898	622	+	0.0120682	0.0120682	RP11-33N16.3	ENSG00000259053	No description	89878656	90421003	0	-	0.252859	intron	opposite
1494	D1	L	14	95430409	95430910	501	+	0	0	RP11-991C1.1	ENSG00000258933	No description	95426614	95429313	1096	-	0.00278463	NA	opposite
1503	D1	L	15	20006257	20006758	501	-	0	0				0	NA	82109	NA	NA	NA	NA
1506	D1	L	15	32404448	32405052	604	+	0	0	CHRNA7	ENSG00000175344	cholinergic receptor, nicotinic, alpha 7 [Source:HGNC Symbol;Acc:1960]	30875128	32464722	0	+	0.117758	exon	same
1507	D1	L	15	35613077	35613699	622	+	0.144818	0.144818	ATPBD4	ENSG00000134146	ATP binding domain 4 [Source:HGNC Symbol;Acc:30543]	35509546	35838394	0	-	0.0673546	utr	opposite
1522	D1	L	15	61485789	61486290	501	-	0	0	RORA	ENSG00000069667	RAR-related orphan receptor A [Source:HGNC Symbol;Acc:10258]	60780483	61521518	0	-	0.194842	intron	same
1526	D1	L	15	66998535	66999157	622	+	0.0120682	0	SMAD6	ENSG00000137834	SMAD family member 6 [Source:HGNC Symbol;Acc:6772]	66994670	67074338	0	+	0.0013212	intron	same
1531	D1	L	15	78012858	78013472	614	+	0	0				0	NA	24021	NA	NA	NA	NA
1534	D1	L	15	81380301	81380921	620	+	0.0242142	0.0242142	C15orf26	ENSG00000156206	chromosome 15 open reading frame 26 [Source:HGNC Symbol;Acc:26782]	81299374	81441516	0	+	0.01444	utr	same
1543	D1	L	15	93211994	93212616	622	+	0	0	FAM174B	ENSG00000185442	family with sequence similarity 174, member B [Source:HGNC Symbol;Acc:34339]	93160673	93353114	0	-	0.0366857	utr	opposite
1544	D1	L	15	94559189	94559802	613	+	0	0	CTD-3049M7.1	ENSG00000258754	No description	94261771	94614049	0	-	0.00243304	utr	opposite
1549	D1	L	15	99665515	99666129	614	+	0.158928	0.171153	SYNM	ENSG00000182253	synemin, intermediate filament protein [Source:HGNC Symbol;Acc:24466]	99638420	99675798	0	+	0.255853	intron	same
1552	D1	L	16	106534	107035	501	-	0.374427	0.164748	SNRNP25	ENSG00000161981	small nuclear ribonucleoprotein 25kDa (U11/U12) [Source:HGNC Symbol;Acc:14161]	103010	107669	0	+	0.300094	exon	opposite
1553	D1	L	16	106764	107264	500	+	0.675314	0.750349	SNRNP25	ENSG00000161981	small nuclear ribonucleoprotein 25kDa (U11/U12) [Source:HGNC Symbol;Acc:14161]	103010	107669	0	+	0.300094	exon	same
1562	D1	L	16	1745487	1746100	613	+	0.0734706	0.0612255	HN1L	ENSG00000206053	hematological and neurological expressed 1-like [Source:HGNC Symbol;Acc:14137]	1728257	1752087	0	+	0.124619	intron	same
1572	D1	L	16	2304083	2304584	501	+	0.868671	0.763831	RNPS1	ENSG00000205937	RNA binding protein S1, serine-rich domain [Source:HGNC Symbol;Acc:10080]	2303117	2318379	0	-	2.70632	intron	opposite
1573	D1	L	16	2304083	2304700	617	+	0.79078	0.669122	RNPS1	ENSG00000205937	RNA binding protein S1, serine-rich domain [Source:HGNC Symbol;Acc:10080]	2303117	2318379	0	-	2.70632	intron	opposite
1574	D1	L	16	2304084	2304585	501	+	0.868671	0.763831	RNPS1	ENSG00000205937	RNA binding protein S1, serine-rich domain [Source:HGNC Symbol;Acc:10080]	2303117	2318379	0	-	2.70632	intron	opposite
1575	D1	L	16	2304089	2304700	611	+	0.798533	0.675682	RNPS1	ENSG00000205937	RNA binding protein S1, serine-rich domain [Source:HGNC Symbol;Acc:10080]	2303117	2318379	0	-	2.70632	intron	opposite
1576	D1	L	16	2304091	2304700	609	+	0.788826	0.677897	RNPS1	ENSG00000205937	RNA binding protein S1, serine-rich domain [Source:HGNC Symbol;Acc:10080]	2303117	2318379	0	-	2.70632	intron	opposite
1577	D1	L	16	2304106	2304700	594	+	0.770804	0.682351	RNPS1	ENSG00000205937	RNA binding protein S1, serine-rich domain [Source:HGNC Symbol;Acc:10080]	2303117	2318379	0	-	2.70632	intron	opposite
1582	D1	L	16	8176273	8176774	501	-	0	0				0	NA	226840	NA	NA	NA	NA
1595	D1	L	16	15687860	15688473	613	+	3.09801	2.37555	KIAA0430	ENSG00000166783	KIAA0430 [Source:HGNC Symbol;Acc:29562]	15688243	15737023	0	-	1.61849	utr	opposite
1601	D1	L	16	17480312	17480813	501	-	0	0	XYLT1	ENSG00000103489	xylosyltransferase I [Source:HGNC Symbol;Acc:15516]	17201254	17564738	0	-	0.165352	intron	same
1605	D1	L	16	19950647	19951148	501	+	0.0149771	0				0	NA	53815	NA	NA	NA	NA
1609	D1	L	16	24218854	24219355	501	+	1.30301	1.28803	PRKCB	ENSG00000166501	protein kinase C, beta [Source:HGNC Symbol;Acc:9395]	23847322	24231932	0	+	0.412411	intron	same
1611	D1	L	16	24969377	24969878	501	-	1.09333	0.97351	ARHGAP17	ENSG00000140750	Rho GTPase activating protein 17 [Source:HGNC Symbol;Acc:18239]	24930710	25026675	0	-	0.480571	intron	same
1613	D1	L	16	29104633	29105134	501	-	0	0.0149771	AC009093.1	ENSG00000103472	RRN3-like protein 1 [Source:UniProtKB/Swiss-Prot;Acc:A6NIE6]	29086163	29127519	0	+	0.105259	intron	opposite
1624	D1	L	16	30412879	30413501	622	+	0.0241364	0.0120682	ZNF48	ENSG00000180035	zinc finger protein 48 [Source:HGNC Symbol;Acc:13114]	30389427	30411429	1450	+	1.48504	NA	same
1636	D1	L	16	46404689	46405302	613	+	0	0				0	NA	184699	NA	NA	NA	NA
1641	D1	L	16	48977598	48978203	605	+	0	0				0	NA	211886	NA	NA	NA	NA
1649	D1	L	16	54644005	54644624	619	+	0	0				0	NA	307125	NA	NA	NA	NA
1650	D1	L	16	56938640	56939141	501	-	0	0	SLC12A3	ENSG00000070915	solute carrier family 12 (sodium/chloride transporters), member 3 [Source:HGNC Symbol;Acc:10912]	56899119	56949760	0	+	0.00386005	intron	opposite
1651	D1	L	16	66266206	66266819	613	+	0	0.0122451				0	NA	68893	NA	NA	NA	NA
1701	D1	L	17	1257168	1257789	621	+	2.16368	2.51422	YWHAE	ENSG00000108953	tyrosine 3-monooxygenase/tryptophan 5-monooxygenase activation protein, epsilon polypeptide [Source:HGNC Symbol;Acc:12851]	1247566	1303505	0	-	0.842302	exon	opposite
1704	D1	L	17	1754546	1755159	613	+	0.195922	0.171431	RPA1	ENSG00000132383	replication protein A1, 70kDa [Source:HGNC Symbol;Acc:10289]	1733266	1802848	0	+	0.417076	intron	same
1706	D1	L	17	2174736	2175237	501	-	0.0449312	0.10484	SMG6	ENSG00000070366	smg-6 homolog, nonsense mediated mRNA decay factor (C. elegans) [Source:HGNC Symbol;Acc:17809]	1963133	2207069	0	-	0.373402	intron	same
1716	D1	L	17	5256149	5256764	615	+	0.402776	0.378366	RABEP1	ENSG00000029725	rabaptin, RAB GTPase binding effector protein 1 [Source:HGNC Symbol;Acc:17677]	5185558	5289129	0	+	0.612531	intron	same
1717	D1	L	17	7294545	7295046	501	+	0.0299542	0.0299542	PLSCR3	ENSG00000187838	phospholipid scramblase 3 [Source:HGNC Symbol;Acc:16495]	7293053	7307416	0	-	0.945308	intron	opposite
1722	D1	L	17	8390004	8390617	613	+	1.02859	1.07757	MYH10	ENSG00000133026	myosin, heavy chain 10, non-muscle [Source:HGNC Symbol;Acc:7568]	8377523	8534079	0	-	0.288	intron	opposite
1725	D1	L	17	13442388	13442996	608	+	0	0	HS3ST3A1	ENSG00000153976	heparan sulfate (glucosamine) 3-O-sulfotransferase 3A1 [Source:HGNC Symbol;Acc:5196]	13399006	13505244	0	-	0.0016277	intron	opposite
1726	D1	L	17	14049985	14050607	622	+	0.0482728	0.0241364	COX10	ENSG00000006695	COX10 homolog, cytochrome c oxidase assembly protein, heme A: farnesyltransferase (yeast) [Source:HGNC Symbol;Acc:2260]	13972846	14111994	0	+	0.0651625	intron	same
1746	D1	L	17	31799446	31800066	620	+	0	0	ACCN1	ENSG00000108684	amiloride-sensitive cation channel 1, neuronal [Source:HGNC Symbol;Acc:99]	31340105	32483551	0	-	0.00700268	intron	opposite
1755	D1	L	17	35776074	35776687	613	+	0	0.0122451	TADA2A	ENSG00000108264	transcriptional adaptor 2A [Source:HGNC Symbol;Acc:11531]	35766965	35838372	0	+	0.116871	intron	same
1762	D1	L	17	40266163	40266782	619	+	2.43745	2.25555	KAT2A	ENSG00000108773	K(lysine) acetyltransferase 2A [Source:HGNC Symbol;Acc:4201]	40265126	40273376	0	-	2.41474	exon	opposite
1766	D1	L	17	41573266	41573888	622	+	0.929252	0.760297	DHX8	ENSG00000067596	DEAH (Asp-Glu-Ala-His) box polypeptide 8 [Source:HGNC Symbol;Acc:2749]	41561331	41604154	0	+	0.816739	exon	same
1768	D1	L	17	42492199	42492821	622	+	0.579274	0.712024	GPATCH8	ENSG00000186566	G patch domain containing 8 [Source:HGNC Symbol;Acc:29066]	42472652	42580802	0	-	0.878783	intron	opposite
1769	D1	L	17	42516897	42517398	501	-	0.853694	0.673969	GPATCH8	ENSG00000186566	G patch domain containing 8 [Source:HGNC Symbol;Acc:29066]	42472652	42580802	0	-	0.878783	intron	same
1773	D1	L	17	43173203	43173818	615	+	1.34259	1.47685	NMT1	ENSG00000136448	N-myristoyltransferase 1 [Source:HGNC Symbol;Acc:7857]	43138680	43186377	0	+	0.578176	exon	same
1781	D1	L	17	49156292	49156793	501	+	0.119817	0.0748854	SPAG9	ENSG00000008294	sperm associated antigen 9 [Source:HGNC Symbol;Acc:14524]	49039535	49198226	0	-	0.270149	intron	opposite
1788	D1	L	17	57438077	57438578	501	+	0.314519	0.209679	YPEL2	ENSG00000175155	yippee-like 2 (Drosophila) [Source:HGNC Symbol;Acc:18326]	57409053	57479095	0	+	0.689023	intron	same
1793	D1	L	17	60051619	60052232	613	+	0.416334	0.465314	MED13	ENSG00000108510	mediator complex subunit 13 [Source:HGNC Symbol;Acc:22474]	60019967	60142643	0	-	0.648416	intron	opposite
1797	D1	L	17	63417116	63417617	501	+	0	0				0	NA	107068	NA	NA	NA	NA
1802	D1	L	17	66700393	66700894	501	+	0	0				0	NA	103298	NA	NA	NA	NA
1805	D1	L	17	71272130	71272756	626	+	0	0				0	NA	7008	NA	NA	NA	NA
1806	D1	L	17	73138160	73138775	615	+	0.18308	0.195286	HN1	ENSG00000189159	hematological and neurological expressed 1 [Source:HGNC Symbol;Acc:14569]	73131343	73150778	0	-	0.17833	intron	opposite
1809	D1	L	17	74183684	74184185	501	+	0.194702	0.0898625	RNF157	ENSG00000141576	ring finger protein 157 [Source:HGNC Symbol;Acc:29402]	74138534	74236390	0	-	0.788444	intron	opposite
1812	D1	L	17	74211487	74211988	501	+	0.404381	0.314519	RNF157	ENSG00000141576	ring finger protein 157 [Source:HGNC Symbol;Acc:29402]	74138534	74236390	0	-	0.788444	intron	opposite
1834	D1	L	17	78698510	78699011	501	+	0.0748854	0.0748854	RPTOR	ENSG00000141564	regulatory associated protein of MTOR, complex 1 [Source:HGNC Symbol;Acc:30287]	78518619	78940173	0	+	0.168257	intron	same
1835	D1	L	17	78724842	78725343	501	+	0.419358	0.299542	RPTOR	ENSG00000141564	regulatory associated protein of MTOR, complex 1 [Source:HGNC Symbol;Acc:30287]	78518619	78940173	0	+	0.168257	intron	same
1854	D1	L	17	80524783	80525400	617	+	0.377141	0.364975	FOXK2	ENSG00000141568	forkhead box K2 [Source:HGNC Symbol;Acc:6036]	80477589	80562483	0	+	0.415003	intron	same
1857	D1	L	17	80809544	80810164	620	+	0.0605354	0.0605354	TBCD	ENSG00000141556	tubulin folding cofactor D [Source:HGNC Symbol;Acc:11581]	80709940	80914691	0	+	0.280063	intron	same
1862	D1	L	18	8593627	8594237	610	+	0	0				0	NA	15206	NA	NA	NA	NA
1863	D1	L	18	11273943	11274564	621	+	0	0				0	NA	125182	NA	NA	NA	NA
1867	D1	L	18	18648786	18649287	501	+	0.0898625	0.119817	ROCK1	ENSG00000067900	Rho-associated, coiled-coil containing protein kinase 1 [Source:HGNC Symbol;Acc:10251]	18529701	18691812	0	-	0.349554	intron	opposite
1869	D1	L	18	20650980	20651481	501	+	0.0149771	0				0	NA	44531	NA	NA	NA	NA
1873	D1	L	18	26410059	26410676	617	+	0	0				0	NA	217908	NA	NA	NA	NA
1874	D1	L	18	26410171	26410672	501	-	0	0				0	NA	217912	NA	NA	NA	NA
1875	D1	L	18	26410172	26410673	501	-	0	0				0	NA	217911	NA	NA	NA	NA
1876	D1	L	18	26410174	26410675	501	-	0	0				0	NA	217909	NA	NA	NA	NA
1877	D1	L	18	26751977	26752478	501	+	0	0				0	NA	23928	NA	NA	NA	NA
1878	D1	L	18	28418902	28419515	613	+	0	0				0	NA	144557	NA	NA	NA	NA
1880	D1	L	18	35387835	35388450	615	+	0	0				0	NA	241835	NA	NA	NA	NA
1882	D1	L	18	39736013	39736635	622	+	0.0241364	0.0362046				0	NA	68219	NA	NA	NA	NA
1886	D1	L	18	44698296	44698916	620	+	0.0726424	0.0605354	IER3IP1	ENSG00000134049	immediate early response 3 interacting protein 1 [Source:HGNC Symbol;Acc:18550]	44681413	44702745	0	-	0.126172	intron	opposite
1891	D1	L	18	60453204	60453814	610	+	0.0246105	0.0246104	PHLPP1	ENSG00000081913	PH domain and leucine rich repeat protein phosphatase 1 [Source:HGNC Symbol;Acc:20610]	60382672	60647666	0	+	0.0463035	intron	same
1893	D1	L	18	65986128	65986629	501	-	0	0				0	NA	354298	NA	NA	NA	NA
1910	D1	L	19	1128943	1129444	501	-	0.134794	0.239633	SBNO2	ENSG00000064932	strawberry notch homolog 2 (Drosophila) [Source:HGNC Symbol;Acc:29158]	1107634	1174282	0	-	0.719034	intron	same
1915	D1	L	19	2449962	2450567	605	+	0.099254	0.111661	LMNB2	ENSG00000176619	lamin B2 [Source:HGNC Symbol;Acc:6638]	2427636	2456994	0	-	0.279648	intron	opposite
1918	D1	L	19	3499207	3499825	618	+	0.0850234	0.0485848	DOHH	ENSG00000129932	deoxyhypusine hydroxylase/monooxygenase [Source:HGNC Symbol;Acc:28662]	3490820	3500938	0	-	0.254109	utr	opposite
1925	D1	L	19	4129840	4130341	501	-	0	0				0	NA	5714	NA	NA	NA	NA
1926	D1	L	19	4310872	4311485	613	+	0.0612255	0.110206	FSD1	ENSG00000105255	fibronectin type III and SPRY domain containing 1 [Source:HGNC Symbol;Acc:13745]	4304591	4323843	0	+	0.0343649	intron	same
1935	D1	L	19	5373876	5374377	501	+	0	0				0	NA	33062	NA	NA	NA	NA
1941	D1	L	19	6577519	6578183	664	+	0	0				0	NA	4451	NA	NA	NA	NA
1942	D1	L	19	6624054	6624674	620	+	0	0				0	NA	32891	NA	NA	NA	NA
1944	D1	L	19	7287051	7287552	501	-	0.0149771	0.0449312	INSR	ENSG00000171105	insulin receptor [Source:HGNC Symbol;Acc:6091]	7112266	7294011	0	-	0.0309847	intron	same
1998	D1	L	19	33930597	33931098	501	-	0.0299542	0.0299542	PEPD	ENSG00000124299	peptidase D [Source:HGNC Symbol;Acc:8840]	33877855	34012799	0	-	0.0709812	intron	same
2006	D1	L	19	39939103	39939716	613	+	0.318373	0.440824	SUPT5H	ENSG00000196235	suppressor of Ty 5 homolog (S. cerevisiae) [Source:HGNC Symbol;Acc:11469]	39936186	39967306	0	+	1.72374	intron	same
2007	D1	L	19	39939299	39939800	501	+	0.35945	0.239633	SUPT5H	ENSG00000196235	suppressor of Ty 5 homolog (S. cerevisiae) [Source:HGNC Symbol;Acc:11469]	39936186	39967306	0	+	1.72374	intron	same
2010	D1	L	19	41786587	41787209	622	+	2.49812	2.43778	HNRNPUL1	ENSG00000105323	heterogeneous nuclear ribonucleoprotein U-like 1 [Source:HGNC Symbol;Acc:17011]	41768391	41813811	0	+	1.6932	exon	same
2035	D1	L	19	47128600	47129213	613	+	0.0244902	0.0244902	PTGIR	ENSG00000160013	prostaglandin I2 (prostacyclin) receptor (IP) [Source:HGNC Symbol;Acc:9602]	47123726	47128354	246	-	0.180288	NA	opposite
2050	D1	L	19	50127518	50128019	501	+	0.224656	0.224656	PRR12	ENSG00000126464	proline rich 12 [Source:HGNC Symbol;Acc:29217]	50094912	50129695	0	+	0.878209	intron	same
2057	D1	L	19	50910409	50910910	501	+	0.554152	0.629037	POLD1	ENSG00000062822	polymerase (DNA directed), delta 1, catalytic subunit 125kDa [Source:HGNC Symbol;Acc:9175]	50887593	50921270	0	+	0.224586	intron	same
2058	D1	L	19	50997698	50998199	501	+	0.449312	0.389404				0	NA	11056	NA	NA	NA	NA
2063	D1	L	19	53615404	53616017	613	+	0.0244902	0.0367353	ZNF415	ENSG00000170954	zinc finger protein 415 [Source:HGNC Symbol;Acc:20636]	53611133	53636171	0	-	0.0417377	intron	opposite
2068	D1	L	19	54620701	54621202	501	-	0.434335	0.35945	PRPF31	ENSG00000105618	PRP31 pre-mRNA processing factor 31 homolog (S. cerevisiae) [Source:HGNC Symbol;Acc:15446]	54618837	54635140	0	+	0.731836	utr	opposite
2071	D1	L	19	55762228	55762729	501	+	0.209679	0.209679	PPP6R1	ENSG00000105063	protein phosphatase 6, regulatory subunit 1 [Source:HGNC Symbol;Acc:29195]	55741148	55770363	0	-	1.63077	utr	opposite
2072	D1	L	19	55762230	55762731	501	+	0.209679	0.209679	PPP6R1	ENSG00000105063	protein phosphatase 6, regulatory subunit 1 [Source:HGNC Symbol;Acc:29195]	55741148	55770363	0	-	1.63077	utr	opposite
2073	D1	L	19	55762230	55762847	617	+	0.267649	0.206819	PPP6R1	ENSG00000105063	protein phosphatase 6, regulatory subunit 1 [Source:HGNC Symbol;Acc:29195]	55741148	55770363	0	-	1.63077	utr	opposite
2081	D1	L	20	952920	953571	651	+	0.0345943	0.0115314	RSPO4	ENSG00000101282	R-spondin 4 [Source:HGNC Symbol;Acc:16175]	939095	982907	0	-	0.0183617	intron	opposite
2082	D1	L	20	952953	953454	501	+	0.0449312	0.0149771	RSPO4	ENSG00000101282	R-spondin 4 [Source:HGNC Symbol;Acc:16175]	939095	982907	0	-	0.0183617	intron	opposite
2083	D1	L	20	1269517	1270126	609	+	0.357437	0.369762	RAD21L1	ENSG00000244588	RAD21-like 1 (S. pombe) [Source:HGNC Symbol;Acc:16271]	1206700	1277065	0	+	0.106207	intron	same
2096	D1	L	20	34324239	34324740	501	+	2.69587	2.95048	RBM39	ENSG00000131051	RNA binding motif protein 39 [Source:HGNC Symbol;Acc:15923]	34291531	34330234	0	-	2.76077	exon	opposite
2100	D1	L	20	47348303	47348804	501	-	0.0449312	0.0449312	PREX1	ENSG00000124126iption=phosphatidylinositol-3,4,5-trisphosphate-dependentRac exchange factor 1 [Source:HGNC Symbol;Acc:32594]	No description	47240790	47444420	0	-	0.273261	intron	same
2101	D1	L	20	49641075	49641689	614	+	0	0	KCNG1	ENSG00000026559	potassium voltage-gated channel, subfamily G, member 1 [Source:HGNC Symbol;Acc:6248]	49620193	49639666	1409	-	0.000386	NA	opposite
2104	D1	L	20	53213821	53214443	622	+	0	0	DOK5	ENSG00000101134	docking protein 5 [Source:HGNC Symbol;Acc:16173]	53092136	53267710	0	+	0.000642	intron	same
2111	D1	L	20	62260811	62261437	626	+	0.58757	0.635535	CTD-3184A7.4	ENSG00000232442	No description	62258580	62260177	634	+	7.29266	NA	same
2112	D1	L	20	62309396	62309897	501	-	0.539175	0.703923	RTEL1	ENSG00000258366	Regulator of telomere elongation helicase 1 [Source:UniProtKB/Swiss-Prot;Acc:Q9NZ71]	0	NA	0	NA	NA	exon	NA
2117	D1	L	21	18072480	18073098	618	+	0	0				0	NA	18219	NA	NA	NA	NA
2118	D1	L	21	18584587	18585088	501	+	0	0				0	NA	218777	NA	NA	NA	NA
2119	D1	L	21	18807532	18808152	620	+	0	0				0	NA	3056	NA	NA	NA	NA
2120	D1	L	21	23984882	23985492	610	+	0	0				0	NA	92505	NA	NA	NA	NA
2125	D1	L	21	30520769	30521387	618	+	0	0.0121462	C21orf7	ENSG00000156265	chromosome 21 open reading frame 7 [Source:HGNC Symbol;Acc:16457]	30449792	30548210	0	+	0.0737954	intron	same
2134	D1	L	21	38132559	38133060	501	+	0.509221	0.35945	HLCS	ENSG00000159267	holocarboxylase synthetase (biotin-(proprionyl-CoA-carboxylase (ATP-hydrolysing)) ligase) [Source:HGNC Symbol;Acc:4976]	38123493	38362536	0	-	0.0957095	intron	opposite
2135	D1	L	21	42396111	42396731	620	+	0	0	TMPRSS3	ENSG00000160183	transmembrane protease, serine 3 [Source:HGNC Symbol;Acc:11877]	38437942	43816955	0	-	0.102811	utr	opposite
2136	D1	L	21	43260596	43261209	613	+	0.0367353	0.0367353	TMPRSS3	ENSG00000160183	transmembrane protease, serine 3 [Source:HGNC Symbol;Acc:11877]	38437942	43816955	0	-	0.102811	intron	opposite
2139	D1	L	21	44257968	44258469	501	-	0.658991	0.838716	MX2	ENSG00000183486	myxovirus (influenza virus) resistance 2 (mouse) [Source:HGNC Symbol;Acc:7533]	42733870	45746674	0	+	0.286772	intron	opposite
2145	D1	L	22	17007973	17008535	562	-	0	0				0	NA	63132	NA	NA	NA	NA
2146	D1	L	22	29165808	29166309	501	-	0.0299542	0				0	NA	2353	NA	NA	NA	NA
2156	D1	L	22	37241287	37241788	501	-	0	0	CTA-833B7.2	ENSG00000183822	No description	37243415	37266483	1627	-	0.0234658	NA	same
2163	D1	L	22	41154437	41155040	603	+	0.0124478	0.0248957				0	NA	10594	NA	NA	NA	NA
2164	D1	L	22	41261331	41261946	615	+	0.231902	0.15867	XPNPEP3	ENSG00000196236	X-prolyl aminopeptidase (aminopeptidase P) 3, putative [Source:HGNC Symbol;Acc:28052]	41253081	41368585	0	+	0.312639	intron	same
2165	D1	L	22	43315974	43316475	501	+	0.0748854	0.0449312	PACSIN2	ENSG00000100266	protein kinase C and casein kinase substrate in neurons 2 [Source:HGNC Symbol;Acc:8571]	43231418	43411151	0	-	0.226182	utr	opposite
2181	D1	L	X	5258789	5259406	617	+	0	0				0	NA	68757	NA	NA	NA	NA
2183	D1	L	X	7097175	7097788	613	+	0	0				0	NA	30944	NA	NA	NA	NA
2187	D1	L	X	15178293	15178794	501	+	0	0				0	NA	74106	NA	NA	NA	NA
2197	D1	L	X	39292386	39293006	620	+	0	0	RP11-157D23.2	ENSG00000234191	No description	39260506	39294078	0	-	0.000224	utr	opposite
2198	D1	L	X	39817116	39817736	620	+	0	0				0	NA	50793	NA	NA	NA	NA
2199	D1	L	X	40018605	40019106	501	+	0.0748854	0.0748854	BCOR	ENSG00000183337	BCL6 corepressor [Source:HGNC Symbol;Acc:20893]	39909068	40036582	0	-	0.102239	utr	opposite
2201	D1	L	X	44513065	44513566	501	-	0	0				0	NA	76381	NA	NA	NA	NA
2207	D1	L	X	53188350	53188851	501	+	2.12675	2.02191				0	NA	16461	NA	NA	NA	NA
2214	D1	L	X	69440703	69441316	613	+	0.0367353	0.0122451	AL357752.1	ENSG00000242657	No description	69441856	69442166	540	-	0	NA	opposite
2216	D1	L	X	70800738	70801239	501	+	0.134794	0.149771	ACRC	ENSG00000147174	acidic repeat containing [Source:HGNC Symbol;Acc:15805]	70798261	70833433	0	+	0.16438	intron	same
2219	D1	L	X	73359730	73360350	620	+	0.0242142	0.0605354				0	NA	77862	NA	NA	NA	NA
2221	D1	L	X	82588254	82588867	613	+	0	0				0	NA	174402	NA	NA	NA	NA
2223	D1	L	X	100346474	100347092	618	+	0	0	TMEM35	ENSG00000126950	transmembrane protein 35 [Source:HGNC Symbol;Acc:25864]	100333709	100351353	0	+	0.00170439	intron	same
2225	D1	L	X	109493777	109494391	614	+	0.0733512	0.0855764	AMMECR1	ENSG00000101935	Alport syndrome, mental retardation, midface hypoplasia and elliptocytosis chromosomal region gene 1 [Source:HGNC Symbol;Acc:467]	109437414	109683461	0	-	0.0622141	intron	opposite
2226	D1	L	X	114827980	114828481	501	-	0	0	PLS3	ENSG00000102024	plastin 3 [Source:HGNC Symbol;Acc:9091]	114795501	114885181	0	+	0.00201206	utr	opposite
2235	D1	L	X	143100409	143101022	613	+	0	0				0	NA	132054	NA	NA	NA	NA
2236	D1	L	X	149614784	149615397	613	+	0	0	MAMLD1	ENSG00000013619	mastermind-like domain containing 1 [Source:HGNC Symbol;Acc:2568]	149529689	149682448	0	+	0.00339602	intron	same
2250	D1	L	Y	8257843	8258453	610	+	0	0				0	NA	17562	NA	NA	NA	NA
3	D1	P	1	981326	981944	618	+	0.522286	0.51014	AGRN	ENSG00000188157	agrin [Source:HGNC Symbol;Acc:329]	955503	991496	0	+	0.126373	exon	same
9	D1	P	1	8587167	8587668	501	-	0.0599083	0.0449312	RERE	ENSG00000142599	arginine-glutamic acid dipeptide (RE) repeats [Source:HGNC Symbol;Acc:9965]	8412457	8877702	0	-	0.266919	intron	same
11	D1	P	1	9842680	9843181	501	+	0.0599083	0.0898625	CLSTN1	ENSG00000171603	calsyntenin 1 [Source:HGNC Symbol;Acc:17447]	9789084	9884584	0	-	0.733419	intron	opposite
13	D1	P	1	11292797	11293410	613	+	0.0857157	0.159186	MTOR	ENSG00000198793	mechanistic target of rapamycin (serine/threonine kinase) [Source:HGNC Symbol;Acc:3942]	11166592	11322608	0	-	0.295069	intron	opposite
17	D1	P	1	16948790	16949291	501	-	2.66592	2.6809	CROCCP2	ENSG00000215908	ciliary rootlet coiled-coil, rootletin pseudogene 2 [Source:HGNC Symbol;Acc:28170]	16944751	16971178	0	-	0.985188	utr	same
32	D1	P	1	28362323	28362936	613	+	0.0244902	0.0244902	EYA3	ENSG00000158161	eyes absent homolog 3 (Drosophila) [Source:HGNC Symbol;Acc:3521]	28296855	28415207	0	-	0.175459	intron	opposite
39	D1	P	1	32723445	32724077	632	+	1.90041	2.03106	LCK	ENSG00000182866	lymphocyte-specific protein tyrosine kinase [Source:HGNC Symbol;Acc:6524]	32716840	32751766	0	+	2.36703	utr	same
40	D1	P	1	32723563	32724064	501	-	1.7673	2.02191	LCK	ENSG00000182866	lymphocyte-specific protein tyrosine kinase [Source:HGNC Symbol;Acc:6524]	32716840	32751766	0	+	2.36703	utr	opposite
41	D1	P	1	32723566	32724067	501	-	1.79725	2.02191	LCK	ENSG00000182866	lymphocyte-specific protein tyrosine kinase [Source:HGNC Symbol;Acc:6524]	32716840	32751766	0	+	2.36703	utr	opposite
43	D1	P	1	35785836	35786449	613	+	0.0122451	0.0122451	ZMYM4	ENSG00000146463	zinc finger, MYM-type 4 [Source:HGNC Symbol;Acc:13055]	35734568	35887659	0	+	0.286562	intron	same
45	D1	P	1	36013353	36013969	616	+	0.158412	0.207155	KIAA0319L	ENSG00000142687	KIAA0319-like [Source:HGNC Symbol;Acc:30071]	35899091	36023551	0	-	0.462004	intron	opposite
47	D1	P	1	36749810	36750311	501	+	0.224656	0.209679	THRAP3	ENSG00000054118	thyroid hormone receptor associated protein 3 [Source:HGNC Symbol;Acc:22964]	36690017	36770958	0	+	0.683744	intron	same
57	D1	P	1	47492298	47492799	501	-	0	0	CYP4X1	ENSG00000186377	cytochrome P450, family 4, subfamily X, polypeptide 1 [Source:HGNC Symbol;Acc:20244]	47427036	47516423	0	+	0.000589	intron	opposite
61	D1	P	1	54284508	54285009	501	-	0.629037	0.629037	TMEM48	ENSG00000058804	transmembrane protein 48 [Source:HGNC Symbol;Acc:25525]	54231133	54304533	0	-	0.211007	exon	same
81	D1	P	1	112010520	112011021	501	+	0.688946	0.673969				0	NA	5125	NA	NA	NA	NA
92	D1	P	1	149951938	149952551	613	+	0.0612255	0.0367353	OTUD7B	ENSG00000163113	OTU domain containing 7B [Source:HGNC Symbol;Acc:16683]	149912231	149982686	0	-	0.0628533	utr	opposite
93	D1	P	1	149960624	149961244	620	+	0.0121071	0	OTUD7B	ENSG00000163113	OTU domain containing 7B [Source:HGNC Symbol;Acc:16683]	149912231	149982686	0	-	0.0628533	utr	opposite
94	D1	P	1	150051278	150051900	622	+	0	0.0120682	VPS45	ENSG00000136631	vacuolar protein sorting 45 homolog (S. cerevisiae) [Source:HGNC Symbol;Acc:14579]	150039369	150117505	0	+	0.224967	intron	same
97	D1	P	1	150664608	150665230	622	+	0.0724092	0.0965457	GOLPH3L	ENSG00000143457	golgi phosphoprotein 3-like [Source:HGNC Symbol;Acc:24882]	150618701	150669672	0	-	0.0734562	intron	opposite
120	D1	P	1	155489676	155490177	501	+	0.25461	0.224656	ASH1L	ENSG00000116539	ash1 (absent, small, or homeotic)-like (Drosophila) [Source:HGNC Symbol;Acc:19088]	155305059	155532598	0	-	0.630253	exon	opposite
130	D1	P	1	174253824	174254325	501	-	0.0599083	0.0748854	RABGAP1L	ENSG00000152061	RAB GTPase activating protein 1-like [Source:HGNC Symbol;Acc:24663]	174128548	174964445	0	+	0.151935	intron	opposite
134	D1	P	1	182251926	182252551	625	+	0	0	GS1-122H1.2	ENSG00000228918	No description	182098445	182283196	0	-	0.00516827	utr	opposite
159	D1	P	1	226919808	226920421	613	+	4.31028	3.55108	ITPKB	ENSG00000143772	inositol-trisphosphate 3-kinase B [Source:HGNC Symbol;Acc:6179]	226819391	226927024	0	-	3.09928	intron	opposite
173	D1	P	2	371632	372252	620	+	0	0				0	NA	16160	NA	NA	NA	NA
186	D1	P	2	20885929	20886430	501	-	1.88711	1.61752	C2orf43	ENSG00000118961	chromosome 2 open reading frame 43 [Source:HGNC Symbol;Acc:26145]	20883803	21022882	0	-	0.0768175	intron	same
201	D1	P	2	27924577	27925195	618	+	0.0121462	0.0121462				0	NA	3458	NA	NA	NA	NA
204	D1	P	2	28155370	28155996	626	+	0.203851	0.167877	MRPL33	ENSG00000243147	mitochondrial ribosomal protein L33 [Source:HGNC Symbol;Acc:14487]	27994584	28210954	0	+	0.0699828	intron	same
207	D1	P	2	37259313	37259814	501	-	0.778808	0.943556	HEATR5B	ENSG00000008869	HEAT repeat containing 5B [Source:HGNC Symbol;Acc:29273]	37195526	37311485	0	-	0.43136	exon	same
234	D1	P	2	102363643	102364144	501	-	0.209679	0.194702	MAP4K4	ENSG00000071054	mitogen-activated protein kinase kinase kinase kinase 4 [Source:HGNC Symbol;Acc:6866]	102313312	102508449	0	+	0.325455	intron	opposite
246	D1	P	2	136326612	136327230	618	+	0.0242924	0.0242924	R3HDM1	ENSG00000048991	R3H domain containing 1 [Source:HGNC Symbol;Acc:9757]	136289025	136482840	0	+	0.1978	utr	same
247	D1	P	2	136806031	136806532	501	+	0	0				0	NA	28930	NA	NA	NA	NA
251	D1	P	2	138327994	138328495	501	+	0	0	THSD7B	ENSG00000144229	thrombospondin, type I, domain containing 7B [Source:HGNC Symbol;Acc:29348]	137523115	138435287	0	+	0.000462	intron	same
259	D1	P	2	157275205	157275819	614	+	0.0122252	0.0122252				0	NA	2888	NA	NA	NA	NA
280	D1	P	2	191750811	191751312	501	-	0.7189	0.673969	GLS	ENSG00000115419	glutaminase [Source:HGNC Symbol;Acc:4331]	191745553	191830278	0	+	1.25841	intron	opposite
281	D1	P	2	192147609	192148110	501	-	0	0	MYO1B	ENSG00000128641	myosin IB [Source:HGNC Symbol;Acc:7596]	192109911	192290115	0	+	0.00258676	intron	opposite
285	D1	P	2	204245886	204246499	613	+	0.0244902	0.0367353	ABI2	ENSG00000138443	abl-interactor 2 [Source:HGNC Symbol;Acc:24011]	204192942	204301606	0	+	0.177056	intron	same
312	D1	P	2	234244707	234245322	615	+	0	0.0122054	SAG	ENSG00000130561	S-antigen; retina and pineal gland (arrestin) [Source:HGNC Symbol;Acc:10521]	234216309	234255701	0	+	0.00419889	intron	same
317	D1	P	3	3137561	3138062	501	-	0.0149771	0.0149771	IL5RA	ENSG00000091181	interleukin 5 receptor, alpha [Source:HGNC Symbol;Acc:6017]	3111233	3168297	0	-	0.00289857	intron	same
318	D1	P	3	4061719	4062220	501	+	0.0449312	0.0299542	SUMF1	ENSG00000144455	sulfatase modifying factor 1 [Source:HGNC Symbol;Acc:20376]	3742498	4508965	0	-	0.0900786	intron	opposite
335	D1	P	3	19827303	19827965	662	+	0	0				0	NA	92999	NA	NA	NA	NA
336	D1	P	3	19827346	19827847	501	+	0	0				0	NA	93117	NA	NA	NA	NA
337	D1	P	3	19827347	19827848	501	+	0	0				0	NA	93116	NA	NA	NA	NA
369	D1	P	3	81925931	81926432	501	-	0	0	RP11-359D24.1	ENSG00000242009	No description	81889698	81972012	0	+	0.000457	utr	opposite
370	D1	P	3	88211456	88212078	622	+	2.8843	2.87223	RP11-373L8.2	ENSG00000244150	No description	88206039	88217879	0	+	1.27181	utr	same
371	D1	P	3	89090538	89091039	501	-	0	0				0	NA	65635	NA	NA	NA	NA
374	D1	P	3	101021031	101021532	501	-	0	0.0149771	IMPG2	ENSG00000081148	interphotoreceptor matrix proteoglycan 2 [Source:HGNC Symbol;Acc:18362]	100945570	101039404	0	-	0.0279635	intron	same
377	D1	P	3	106044825	106045447	622	+	0	0				0	NA	189297	NA	NA	NA	NA
380	D1	P	3	111319402	111320018	616	+	2.7052	2.83924	CD96	ENSG00000153283	CD96 molecule [Source:HGNC Symbol;Acc:16892]	111260926	111384597	0	+	1.62702	exon	same
384	D1	P	3	120185948	120186570	622	+	0	0				0	NA	15848	NA	NA	NA	NA
388	D1	P	3	122306196	122306697	501	+	0.0149771	0.0149771	PARP15	ENSG00000173200	poly (ADP-ribose) polymerase family, member 15 [Source:HGNC Symbol;Acc:26876]	122296449	122357894	0	+	0.734768	intron	same
389	D1	P	3	122306201	122306702	501	+	0.0149771	0.0149771	PARP15	ENSG00000173200	poly (ADP-ribose) polymerase family, member 15 [Source:HGNC Symbol;Acc:26876]	122296449	122357894	0	+	0.734768	intron	same
390	D1	P	3	122306201	122306814	613	+	0.0244902	0.0244902	PARP15	ENSG00000173200	poly (ADP-ribose) polymerase family, member 15 [Source:HGNC Symbol;Acc:26876]	122296449	122357894	0	+	0.734768	intron	same
399	D1	P	3	138625983	138626596	613	+	0.0122451	0.0244902				0	NA	27435	NA	NA	NA	NA
403	D1	P	3	142763441	142764063	622	+	0.615479	0.494797	U2SURP	ENSG00000163714	U2 snRNP-associated SURP domain containing [Source:HGNC Symbol;Acc:30855]	142720010	142779567	0	+	1.07668	exon	same
404	D1	P	3	143004586	143005200	614	+	0.158928	0.207828	SLC9A9	ENSG00000181804	solute carrier family 9 (sodium/hydrogen exchanger), member 9 [Source:HGNC Symbol;Acc:20653]	142984064	143567373	0	-	0.0714199	intron	opposite
412	D1	P	3	169817279	169817893	614	+	2.42059	2.13941	PHC3	ENSG00000173889	polyhomeotic homolog 3 (Drosophila) [Source:HGNC Symbol;Acc:15682]	169804520	169899537	0	-	1.342	intron	opposite
414	D1	P	3	171864871	171865493	622	+	0.0241364	0.0482728	FNDC3B	ENSG00000075420	fibronectin type III domain containing 3B [Source:HGNC Symbol;Acc:24670]	171757418	172119455	0	+	0.100513	intron	same
416	D1	P	3	177439145	177439759	614	+	0	0	RP11-335L9.1	ENSG00000228221	No description	177159709	177470093	0	+	0.000993	utr	same
425	D1	P	3	195055259	195055760	501	-	0.0449312	0.0449312	ACAP2	ENSG00000114331	ArfGAP with coiled-coil, ankyrin repeat and PH domains 2 [Source:HGNC Symbol;Acc:16469]	194995465	195163807	0	-	0.342377	intron	same
435	D1	P	4	1879162	1879663	501	+	0.329496	0.344473	WHSC1	ENSG00000109685	Wolf-Hirschhorn syndrome candidate 1 [Source:HGNC Symbol;Acc:12766]	1873151	1983934	0	+	0.317275	utr	same
436	D1	P	4	1879167	1879780	613	+	0.269392	0.293882	WHSC1	ENSG00000109685	Wolf-Hirschhorn syndrome candidate 1 [Source:HGNC Symbol;Acc:12766]	1873151	1983934	0	+	0.317275	utr	same
447	D1	P	4	27010140	27010641	501	-	4.1187	4.55303	STIM2	ENSG00000109689	stromal interaction molecule 2 [Source:HGNC Symbol;Acc:19205]	26859300	27027003	0	+	0.304229	exon	opposite
451	D1	P	4	36535297	36535798	501	+	0	0	RP11-722M1.1	ENSG00000248215	No description	36498159	36643522	0	-	0.000569	utr	opposite
462	D1	P	4	68430001	68430619	618	+	0	0	STAP1	ENSG00000035720	signal transducing adaptor family member 1 [Source:HGNC Symbol;Acc:24133]	68424446	68473055	0	+	0.069756	intron	same
463	D1	P	4	68430115	68430616	501	-	0	0	STAP1	ENSG00000035720	signal transducing adaptor family member 1 [Source:HGNC Symbol;Acc:24133]	68424446	68473055	0	+	0.069756	intron	opposite
485	D1	P	4	102556418	102557031	613	+	0	0	BANK1	ENSG00000153064	B-cell scaffold protein with ankyrin repeats 1 [Source:HGNC Symbol;Acc:18233]	102332443	102995969	0	+	0.00117844	utr	same
488	D1	P	4	106145554	106146055	501	-	0.0299542	0.0299542	TET2	ENSG00000168769	tet methylcytosine dioxygenase 2 [Source:HGNC Symbol;Acc:25941]	106067032	106200973	0	+	0.132473	intron	opposite
490	D1	P	4	108864906	108865407	501	-	0.164748	0.119817	RP11-286E11.1	ENSG00000245293	No description	108784635	108899955	0	-	0.0440074	intron	same
504	D1	P	4	123090465	123090966	501	-	0.149771	0.149771	KIAA1109	ENSG00000138688	KIAA1109 [Source:HGNC Symbol;Acc:26953]	123073488	123283913	0	+	0.497217	utr	opposite
507	D1	P	4	130205587	130206088	501	+	0	0				0	NA	14242	NA	NA	NA	NA
511	D1	P	4	140282660	140283282	622	+	1.78609	1.54473	NAA15	ENSG00000164134	N(alpha)-acetyltransferase 15, NatA auxiliary subunit [Source:HGNC Symbol;Acc:30782]	140222609	140341187	0	+	0.373645	exon	same
512	D1	P	4	140621252	140621753	501	-	0	0.0149771	MGST2	ENSG00000085871	microsomal glutathione S-transferase 2 [Source:HGNC Symbol;Acc:7063]	140586922	140661899	0	+	0.0409126	intron	opposite
513	D1	P	4	141451910	141452411	501	-	0.119817	0.0898625	ELMOD2	ENSG00000179387	ELMO/CED-12 domain containing 2 [Source:HGNC Symbol;Acc:28111]	141445312	141474924	0	+	0.490265	intron	opposite
522	D1	P	4	154264478	154264979	501	-	0.0149771	0	MND1	ENSG00000121211	meiotic nuclear divisions 1 homolog (S. cerevisiae) [Source:HGNC Symbol;Acc:24839]	154265801	154336270	822	+	0.0214448	NA	opposite
530	D1	P	4	171233882	171234502	620	+	0	0				0	NA	29652	NA	NA	NA	NA
540	D1	P	4	184604917	184605418	501	-	0.898625	0.838716	C4orf41	ENSG00000168538	chromosome 4 open reading frame 41 [Source:HGNC Symbol;Acc:25751]	184580420	184634745	0	+	0.397335	exon	opposite
554	D1	P	5	16660666	16661167	501	-	0.119817	0.10484				0	NA	4228	NA	NA	NA	NA
559	D1	P	5	31537142	31537643	501	+	0.224656	0.25461	C5orf22	ENSG00000082213	chromosome 5 open reading frame 22 [Source:HGNC Symbol;Acc:25639]	31532373	31555165	0	+	0.345693	intron	same
562	D1	P	5	36726472	36726973	501	+	0	0	CTD-2353F22.1	ENSG00000250155	No description	36666316	36725297	1175	-	0.0178459	NA	opposite
570	D1	P	5	50016803	50017416	613	+	0.0367353	0.0244902	PARP8	ENSG00000151883	poly (ADP-ribose) polymerase family, member 8 [Source:HGNC Symbol;Acc:26124]	49961733	50142356	0	+	0.346654	intron	same
579	D1	P	5	73833911	73834412	501	+	0	0	CTC-419K13.1	ENSG00000248673	No description	73665201	73832801	1110	-	0.000449	NA	opposite
592	D1	P	5	86780279	86780780	501	+	0.0149771	0				0	NA	22234	NA	NA	NA	NA
599	D1	P	5	104267074	104267575	501	+	0	0	RP11-6N13.1	ENSG00000251574	No description	103718999	104728671	0	-	0.000313	utr	opposite
609	D1	P	5	125798475	125799097	622	+	0.253432	0.241364	GRAMD3	ENSG00000155324	GRAM domain containing 3 [Source:HGNC Symbol;Acc:24911]	125695824	125832186	0	+	0.160225	intron	same
610	D1	P	5	125798592	125799093	501	-	0.239633	0.239633	GRAMD3	ENSG00000155324	GRAM domain containing 3 [Source:HGNC Symbol;Acc:24911]	125695824	125832186	0	+	0.160225	intron	opposite
630	D1	P	5	153006232	153006845	613	+	0	0	GRIA1	ENSG00000155511	glutamate receptor, ionotropic, AMPA 1 [Source:HGNC Symbol;Acc:4571]	152869175	153193240	0	+	0.000325	intron	same
632	D1	P	5	156677274	156677775	501	-	0.539175	0.554152	ITK	ENSG00000113263	IL2-inducible T-cell kinase [Source:HGNC Symbol;Acc:6171]	156569944	156682201	0	+	2.16169	intron	opposite
642	D1	P	5	173983059	173983560	501	+	0	0				0	NA	23599	NA	NA	NA	NA
652	D1	P	5	179144404	179145024	620	+	0.0242142	0.0242142	CANX	ENSG00000127022	calnexin [Source:HGNC Symbol;Acc:1473]	179105629	179157926	0	+	0.604522	intron	same
667	D1	P	6	14906519	14907141	622	+	0	0				0	NA	34560	NA	NA	NA	NA
676	D1	P	6	30506087	30506588	501	-	0.269587	0.194702				0	NA	2566	NA	NA	NA	NA
677	D1	P	6	30589237	30589890	653	+	0.24142	0.24142	MRPS18B	ENSG00000204568	mitochondrial ribosomal protein S18B [Source:HGNC Symbol;Acc:14516]	30585486	30594172	0	+	0.569491	intron	same
678	D1	P	6	30589272	30589773	501	+	0.25461	0.269587	MRPS18B	ENSG00000204568	mitochondrial ribosomal protein S18B [Source:HGNC Symbol;Acc:14516]	30585486	30594172	0	+	0.569491	intron	same
679	D1	P	6	30589276	30589777	501	+	0.25461	0.25461	MRPS18B	ENSG00000204568	mitochondrial ribosomal protein S18B [Source:HGNC Symbol;Acc:14516]	30585486	30594172	0	+	0.569491	intron	same
685	D1	P	6	31498364	31498976	612	+	10.0696	10.0206	ATP6V1G2-DDX39B	ENSG00000254870	ATP6V1G2-DDX39B readthrough (non-protein coding) [Source:HGNC Symbol;Acc:41999]	31497996	31514385	0	-	5.16845	exon	opposite
687	D1	P	6	31662433	31662934	501	-	0.0748854	0.0449312	ABHD16A	ENSG00000204427	abhydrolase domain containing 16A [Source:HGNC Symbol;Acc:13921]	31654726	31671221	0	-	0.56334	intron	same
700	D1	P	6	36499715	36500335	620	+	0.653782	0.677996	STK38	ENSG00000112079	serine/threonine kinase 38 [Source:HGNC Symbol;Acc:17847]	36461669	36515247	0	-	3.12659	intron	opposite
703	D1	P	6	37888457	37888958	501	-	0.224656	0.239633	ZFAND3	ENSG00000156639	zinc finger, AN1-type domain 3 [Source:HGNC Symbol;Acc:18019]	37787275	38122400	0	+	0.247232	intron	opposite
708	D1	P	6	41385944	41386445	501	-	0	0				0	NA	62698	NA	NA	NA	NA
709	D1	P	6	42604193	42604694	501	-	0.10484	0.119817	UBR2	ENSG00000024048	ubiquitin protein ligase E3 component n-recognin 2 [Source:HGNC Symbol;Acc:21289]	42531800	42661242	0	+	0.555975	intron	opposite
716	D1	P	6	53733533	53734034	501	-	0	0	LRRC1	ENSG00000137269	leucine rich repeat containing 1 [Source:HGNC Symbol;Acc:14307]	53659295	53788919	0	+	0.0120644	intron	opposite
717	D1	P	6	63055895	63056508	613	+	0	0				0	NA	59763	NA	NA	NA	NA
722	D1	P	6	74136359	74137035	676	+	0.0111056	0.0111056	MB21D1	ENSG00000164430	Mab-21 domain containing 1 [Source:HGNC Symbol;Acc:21367]	74123238	74161999	0	-	0.0640087	intron	opposite
723	D1	P	6	74136472	74136973	501	-	0.0149771	0.0149771	MB21D1	ENSG00000164430	Mab-21 domain containing 1 [Source:HGNC Symbol;Acc:21367]	74123238	74161999	0	-	0.0640087	intron	same
724	D1	P	6	74136474	74136975	501	-	0.0149771	0.0149771	MB21D1	ENSG00000164430	Mab-21 domain containing 1 [Source:HGNC Symbol;Acc:21367]	74123238	74161999	0	-	0.0640087	intron	same
726	D1	P	6	82892439	82892940	501	-	0.808762	0.853694	IBTK	ENSG00000005700	inhibitor of Bruton agammaglobulinemia tyrosine kinase [Source:HGNC Symbol;Acc:17853]	82879700	82957471	0	-	0.279967	intron	same
747	D1	P	6	125605760	125606372	612	+	0.0245302	0.0245302	HDDC2	ENSG00000111906	HD domain containing 2 [Source:HGNC Symbol;Acc:21078]	125596496	125623282	0	-	0.219209	intron	opposite
755	D1	P	6	139786851	139787464	613	+	0	0				0	NA	3837	NA	NA	NA	NA
769	D1	P	6	159087754	159088367	613	+	5.76744	5.7552	SYTL3	ENSG00000164674	synaptotagmin-like 3 [Source:HGNC Symbol;Acc:15587]	159071046	159185908	0	+	1.38479	intron	same
784	D1	P	7	4665919	4666420	501	-	0	0				0	NA	16968	NA	NA	NA	NA
788	D1	P	7	9917748	9918249	501	-	0	0				0	NA	82402	NA	NA	NA	NA
791	D1	P	7	11117302	11117916	614	+	0.244504	0.244504	PHF14	ENSG00000106443	PHD finger protein 14 [Source:HGNC Symbol;Acc:22203]	11013499	11209250	0	+	0.172415	intron	same
806	D1	P	7	28008669	28009283	614	+	0.0366756	0.0366756	JAZF1	ENSG00000153814	JAZF zinc finger 1 [Source:HGNC Symbol;Acc:28917]	27870192	28220362	0	-	0.0473434	intron	opposite
820	D1	P	7	50437235	50437736	501	+	3.68436	5.0323	IKZF1	ENSG00000185811	IKAROS family zinc finger 1 (Ikaros) [Source:HGNC Symbol;Acc:13176]	50343720	50472799	0	+	2.05745	intron	same
830	D1	P	7	62350956	62351457	501	-	0	0				0	NA	120384	NA	NA	NA	NA
836	D1	P	7	76992893	76993394	501	+	0.0898625	0.10484	PION	ENSG00000186088	pigeon homolog (Drosophila) [Source:HGNC Symbol;Acc:28042]	76940068	77046115	0	-	0.39908	intron	opposite
843	D1	P	7	86549973	86550595	622	+	0.0482728	0.0482728	KIAA1324L	ENSG00000164659	KIAA1324-like [Source:HGNC Symbol;Acc:21945]	86506222	86689015	0	-	0.0468893	intron	opposite
848	D1	P	7	99531712	99532213	501	-	0.0149771	0.0149771	RP4-604G5.1	ENSG00000237640	No description	99527015	99546243	0	+	0.00899295	utr	opposite
860	D1	P	7	105918655	105919273	618	+	0.157901	0.145754	NAMPT	ENSG00000105835	nicotinamide phosphoribosyltransferase [Source:HGNC Symbol;Acc:30092]	105888731	105926772	0	-	0.383613	intron	opposite
864	D1	P	7	112450136	112450754	618	+	0.0121462	0.0121462				0	NA	8448	NA	NA	NA	NA
868	D1	P	7	123344753	123345254	501	+	0.0748854	0.0748854	WASL	ENSG00000106299	Wiskott-Aldrich syndrome-like [Source:HGNC Symbol;Acc:12735]	123321989	123389121	0	-	0.158919	intron	opposite
870	D1	P	7	130776200	130776818	618	+	1.68832	1.65188	AC058791.2	ENSG00000231721	No description	130626519	130794935	0	-	1.31824	utr	opposite
875	D1	P	7	138938554	138939055	501	-	0.0149771	0	UBN2	ENSG00000157741	ubinuclein 2 [Source:HGNC Symbol;Acc:21931]	138915102	138992981	0	+	0.194913	intron	opposite
887	D1	P	7	150250608	150251230	622	+	0.144818	0.120682				0	NA	13135	NA	NA	NA	NA
888	D1	P	7	150250726	150251227	501	-	0.119817	0.149771				0	NA	13138	NA	NA	NA	NA
893	D1	P	7	155057186	155057687	501	+	0.0149771	0	AC099552.2	ENSG00000225612	No description	155059009	155059762	1322	+	0	NA	same
894	D1	P	7	155057188	155057801	613	+	0.0122451	0.0122451	AC099552.2	ENSG00000225612	No description	155059009	155059762	1208	+	0	NA	same
895	D1	P	7	155537512	155538013	501	-	6.32033	6.79959	RBM33	ENSG00000184863	RNA binding motif protein 33 [Source:HGNC Symbol;Acc:27223]	155437145	155574179	0	+	0.744415	exon	opposite
900	D1	P	8	2117396	2117897	501	+	0.0299542	0.0449312	RP11-1049H7.1	ENSG00000254304	No description	2104674	2142690	0	+	0.0077129	utr	same
901	D1	P	8	2117396	2118010	614	+	0.0244504	0.0366756	RP11-1049H7.1	ENSG00000254304	No description	2104674	2142690	0	+	0.0077129	utr	same
915	D1	P	8	28755136	28755637	501	+	0.0299542	0.0449312	AC108449.3	ENSG00000259412	No description	28718058	28810397	0	+	0.0458405	utr	same
922	D1	P	8	38686817	38687431	614	+	1.27142	1.14917	TACC1	ENSG00000147526	transforming, acidic coiled-coil containing protein 1 [Source:HGNC Symbol;Acc:11522]	38585704	38710546	0	+	0.472936	intron	same
933	D1	P	8	79436393	79437006	613	+	0.244902	0.220412	RP11-594N15.2	ENSG00000254266	No description	79338338	79470738	0	-	0.131857	utr	opposite
935	D1	P	8	81474485	81474985	500	+	0	0				0	NA	22835	NA	NA	NA	NA
936	D1	P	8	81474485	81474986	501	+	0	0				0	NA	22834	NA	NA	NA	NA
937	D1	P	8	81474485	81475102	617	+	0	0				0	NA	22718	NA	NA	NA	NA
938	D1	P	8	81474488	81474989	501	+	0	0				0	NA	22831	NA	NA	NA	NA
939	D1	P	8	81474498	81475103	605	+	0	0				0	NA	22717	NA	NA	NA	NA
951	D1	P	8	103305782	103306404	622	+	3.62046	4.10319	UBR5	ENSG00000104517	ubiquitin protein ligase E3 component n-recognin 5 [Source:HGNC Symbol;Acc:16806]	103264501	103425069	0	-	0.611241	exon	opposite
970	D1	P	8	134965560	134966173	613	+	0	0				0	NA	50985	NA	NA	NA	NA
975	D1	P	8	145058617	145059118	501	+	5.76618	5.12216	PARP10	ENSG00000178685	poly (ADP-ribose) polymerase family, member 10 [Source:HGNC Symbol;Acc:25895]	145051321	145086940	0	-	0.756282	exon	opposite
976	D1	P	8	145263946	145264559	613	+	0.171431	0.110206	HEATR7A	ENSG00000179832	HEAT repeat containing 7A [Source:HGNC Symbol;Acc:26958]	145202919	145316843	0	+	0.181091	intron	same
1004	D1	P	9	77697126	77697739	613	+	1.01634	1.0041	C9orf95	ENSG00000106733	chromosome 9 open reading frame 95 [Source:HGNC Symbol;Acc:26057]	77675489	77703133	0	-	1.34297	intron	opposite
1006	D1	P	9	82192347	82192969	622	+	0.144818	0.13275	TLE4	ENSG00000106829	transducin-like enhancer of split 4 (E(sp1) homolog, Drosophila) [Source:HGNC Symbol;Acc:11840]	82186688	82341658	0	+	0.384485	intron	same
1021	D1	P	9	99387429	99387930	501	-	0	0				0	NA	5317	NA	NA	NA	NA
1028	D1	P	9	106144097	106144713	616	+	0	0	RP11-436F21.1	ENSG00000226566	No description	106124234	106192174	0	-	0.000221	utr	opposite
1041	D1	P	9	131284836	131285458	622	+	1.3275	1.31543	GLE1	ENSG00000119392	GLE1 RNA export mediator homolog (yeast) [Source:HGNC Symbol;Acc:4315]	131266979	131304567	0	+	0.571053	exon	same
1050	D1	P	9	139757111	139757612	501	+	3.29496	2.96546	EDF1	ENSG00000107223	endothelial differentiation-related factor 1 [Source:HGNC Symbol;Acc:3164]	139756571	139760738	0	-	1.6343	exon	opposite
1054	D1	P	9	140141125	140141747	622	+	0.0120682	0.0120682	FAM166A	ENSG00000188163	family with sequence similarity 166, member A [Source:HGNC Symbol;Acc:33818]	140138036	140142222	0	-	0.13288	intron	opposite
1055	D1	P	9	140528279	140528780	501	+	0.209679	0.25461	EHMT1	ENSG00000181090	euchromatic histone-lysine N-methyltransferase 1 [Source:HGNC Symbol;Acc:24650]	140513444	140764468	0	+	0.403832	intron	same
1059	D1	P	10	5739009	5739510	501	-	0.629037	0.688946	FAM208B	ENSG00000108021	family with sequence similarity 208, member B [Source:HGNC Symbol;Acc:23484]	5726801	5805703	0	+	0.808994	utr	opposite
1060	D1	P	10	5824790	5825396	606	+	0.185795	0.148636	GDI2	ENSG00000057608	GDP dissociation inhibitor 2 [Source:HGNC Symbol;Acc:4227]	5807186	5884095	0	-	0.31204	intron	opposite
1063	D1	P	10	6630787	6631409	622	+	5.06865	4.73074				0	NA	3146	NA	NA	NA	NA
1064	D1	P	10	6631262	6631763	501	-	5.00234	4.86755				0	NA	3621	NA	NA	NA	NA
1065	D1	P	10	6668657	6669158	501	+	2.63597	2.5461	RP11-554I8.1	ENSG00000225948	No description	6660678	6667308	1349	+	1.33906	NA	same
1068	D1	P	10	7352464	7352965	501	-	0.119817	0.0898625	SFMBT2	ENSG00000198879	Scm-like with four mbt domains 2 [Source:HGNC Symbol;Acc:20256]	7200586	7453450	0	-	0.528746	intron	same
1069	D1	P	10	8945550	8946051	501	+	0	0	RP11-428L9.1	ENSG00000234752	No description	8939952	8956559	0	+	0.00226352	utr	same
1070	D1	P	10	8945551	8946052	501	+	0	0	RP11-428L9.1	ENSG00000234752	No description	8939952	8956559	0	+	0.00226352	utr	same
1071	D1	P	10	8945555	8946168	613	+	0	0	RP11-428L9.1	ENSG00000234752	No description	8939952	8956559	0	+	0.00226352	utr	same
1078	D1	P	10	28840764	28841265	501	+	0.524198	0.479267	WAC	ENSG00000095787	WW domain containing adaptor with coiled-coil [Source:HGNC Symbol;Acc:17327]	28821422	28909928	0	+	1.0486	intron	same
1096	D1	P	10	63184748	63185249	501	-	0	0	TMEM26	ENSG00000196932	transmembrane protein 26 [Source:HGNC Symbol;Acc:28550]	63166401	63213208	0	-	0.000321	intron	same
1107	D1	P	10	73939120	73939742	622	+	0.0724092	0.0844775	ASCC1	ENSG00000138303	activating signal cointegrator 1 complex subunit 1 [Source:HGNC Symbol;Acc:24268]	73856278	73980083	0	-	0.220321	intron	opposite
1109	D1	P	10	74791621	74792243	622	+	0.181023	0.168955	P4HA1	ENSG00000122884	prolyl 4-hydroxylase, alpha polypeptide I [Source:HGNC Symbol;Acc:8546]	74766975	74856732	0	-	0.125311	intron	opposite
1126	D1	P	10	103707754	103708376	622	+	0.120682	0.120682	C10orf76	ENSG00000120029	chromosome 10 open reading frame 76 [Source:HGNC Symbol;Acc:25788]	103605356	103815950	0	-	0.193715	intron	opposite
1134	D1	P	10	120465164	120465777	613	+	0.0734706	0.0857157	C10orf46	ENSG00000151893	chromosome 10 open reading frame 46 [Source:HGNC Symbol;Acc:23727]	120433679	120514761	0	-	0.323799	intron	opposite
1136	D1	P	10	121893567	121894068	501	-	0	0				0	NA	9829	NA	NA	NA	NA
1143	D1	P	10	131345259	131345760	501	-	0.0449312	0.0449312	MGMT	ENSG00000170430	O-6-methylguanine-DNA methyltransferase [Source:HGNC Symbol;Acc:7059]	131265448	131566271	0	+	0.05346	intron	opposite
1146	D1	P	11	244372	244873	501	-	2.36638	2.30647	PSMD13	ENSG00000185627	proteasome (prosome, macropain) 26S subunit, non-ATPase, 13 [Source:HGNC Symbol;Acc:9558]	236546	252983	0	+	1.9265	exon	opposite
1151	D1	P	11	3768076	3768577	501	+	0.748854	0.733877	NUP98	ENSG00000110713	nucleoporin 98kDa [Source:HGNC Symbol;Acc:8068]	3692313	3819022	0	-	0.660056	intron	opposite
1192	D1	P	11	64963768	64964269	501	+	0.134794	0.0599083	CAPN1	ENSG00000014216	calpain 1, (mu/I) large subunit [Source:HGNC Symbol;Acc:1476]	64948037	64979477	0	+	0.572	intron	same
1196	D1	P	11	65263150	65263651	501	-	0.0149771	0.0299542	MALAT1	ENSG00000251562	metastasis associated lung adenocarcinoma transcript 1 (non-protein coding) [Source:HGNC Symbol;Acc:29665]	65265233	65273940	1582	+	19.8979	NA	opposite
1199	D1	P	11	65737437	65737938	501	+	0.838716	0.943556	SART1	ENSG00000175467	squamous cell carcinoma antigen recognized by T cells [Source:HGNC Symbol;Acc:10538]	65729160	65747299	0	+	1.23471	intron	same
1200	D1	P	11	65828611	65829224	613	+	2.62045	2.64494	SF3B2	ENSG00000087365	splicing factor 3b, subunit 2, 145kDa [Source:HGNC Symbol;Acc:10769]	65818200	65836779	0	+	2.18392	intron	same
1202	D1	P	11	65849341	65849954	613	+	0.636745	0.57552	PACS1	ENSG00000175115	phosphofurin acidic cluster sorting protein 1 [Source:HGNC Symbol;Acc:30032]	65837834	66012218	0	+	1.23126	intron	same
1203	D1	P	11	65851774	65852275	501	+	0.703923	0.748854	PACS1	ENSG00000175115	phosphofurin acidic cluster sorting protein 1 [Source:HGNC Symbol;Acc:30032]	65837834	66012218	0	+	1.23126	intron	same
1204	D1	P	11	65854799	65855300	501	+	0.883648	0.823739	PACS1	ENSG00000175115	phosphofurin acidic cluster sorting protein 1 [Source:HGNC Symbol;Acc:30032]	65837834	66012218	0	+	1.23126	intron	same
1206	D1	P	11	65877764	65878396	632	+	1.50845	1.29465	PACS1	ENSG00000175115	phosphofurin acidic cluster sorting protein 1 [Source:HGNC Symbol;Acc:30032]	65837834	66012218	0	+	1.23126	intron	same
1207	D1	P	11	65882169	65882670	501	+	1.49771	1.34794	PACS1	ENSG00000175115	phosphofurin acidic cluster sorting protein 1 [Source:HGNC Symbol;Acc:30032]	65837834	66012218	0	+	1.23126	intron	same
1208	D1	P	11	65900003	65900609	606	+	0.966133	0.84227	PACS1	ENSG00000175115	phosphofurin acidic cluster sorting protein 1 [Source:HGNC Symbol;Acc:30032]	65837834	66012218	0	+	1.23126	intron	same
1210	D1	P	11	65928114	65928728	614	+	0.525683	0.550134	PACS1	ENSG00000175115	phosphofurin acidic cluster sorting protein 1 [Source:HGNC Symbol;Acc:30032]	65837834	66012218	0	+	1.23126	intron	same
1211	D1	P	11	65958932	65959554	622	+	0.615479	0.543069	PACS1	ENSG00000175115	phosphofurin acidic cluster sorting protein 1 [Source:HGNC Symbol;Acc:30032]	65837834	66012218	0	+	1.23126	intron	same
1221	D1	P	11	66954110	66954723	613	+	0.563275	0.587765	KDM2A	ENSG00000173120	lysine (K)-specific demethylase 2A [Source:HGNC Symbol;Acc:13606]	66886740	67025141	0	+	0.885583	intron	same
1222	D1	P	11	66978286	66978787	501	+	0.404381	0.434335	KDM2A	ENSG00000173120	lysine (K)-specific demethylase 2A [Source:HGNC Symbol;Acc:13606]	66886740	67025141	0	+	0.885583	intron	same
1226	D1	P	11	67174151	67174652	501	+	8.68671	8.40214	PPP1CA	ENSG00000172531	protein phosphatase 1, catalytic subunit, alpha isozyme [Source:HGNC Symbol;Acc:9281]	67165654	67188654	0	-	2.26852	exon	opposite
1231	D1	P	11	70347387	70348062	675	+	0	0	SHANK2	ENSG00000162105	SH3 and multiple ankyrin repeat domains 2 [Source:HGNC Symbol;Acc:14295]	70313961	70963623	0	-	0.000648	exon	opposite
1232	D1	P	11	70347502	70348003	501	-	0	0	SHANK2	ENSG00000162105	SH3 and multiple ankyrin repeat domains 2 [Source:HGNC Symbol;Acc:14295]	70313961	70963623	0	-	0.000648	exon	same
1233	D1	P	11	70347503	70348004	501	-	0	0	SHANK2	ENSG00000162105	SH3 and multiple ankyrin repeat domains 2 [Source:HGNC Symbol;Acc:14295]	70313961	70963623	0	-	0.000648	exon	same
1241	D1	P	11	74481642	74482255	613	+	0.183677	0.122451	RNF169	ENSG00000166439	ring finger protein 169 [Source:HGNC Symbol;Acc:26961]	74459913	74553458	0	+	0.714589	intron	same
1242	D1	P	11	75746711	75747212	501	-	0.149771	0.179725	UVRAG	ENSG00000198382	UV radiation resistance associated gene [Source:HGNC Symbol;Acc:12640]	75526212	75854239	0	+	0.110957	intron	opposite
1243	D1	P	11	76080754	76081372	618	+	0.145754	0.145754	PRKRIR	ENSG00000137492	protein-kinase, interferon-inducible double stranded RNA dependent inhibitor, repressor of (P58 repressor) [Source:HGNC Symbol;Acc:9440]	76061000	76092015	0	-	0.431	intron	opposite
1245	D1	P	11	76478345	76478959	614	+	0.0122252	0	RP11-21L23.4	ENSG00000254632	No description	76470960	76479267	0	-	0	utr	opposite
1250	D1	P	11	84280274	84280775	501	+	0	0	DLG2	ENSG00000150672	discs, large homolog 2 (Drosophila) [Source:HGNC Symbol;Acc:2901]	83166055	85338966	0	-	0.0123975	intron	opposite
1251	D1	P	11	87030632	87031133	501	+	0.0299542	0.0299542	TMEM135	ENSG00000166575	transmembrane protein 135 [Source:HGNC Symbol;Acc:26167]	86748886	87034756	0	+	0.0557566	intron	same
1252	D1	P	11	88074360	88074860	500	+	0	0				0	NA	3405	NA	NA	NA	NA
1253	D1	P	11	88074360	88074861	501	+	0	0				0	NA	3405	NA	NA	NA	NA
1254	D1	P	11	88074361	88074861	500	+	0	0				0	NA	3406	NA	NA	NA	NA
1255	D1	P	11	88074380	88074976	596	+	0	0				0	NA	3425	NA	NA	NA	NA
1257	D1	P	11	88399515	88400137	622	+	0	0	GRM5	ENSG00000168959	glutamate receptor, metabotropic 5 [Source:HGNC Symbol;Acc:4597]	88237744	88799113	0	-	0.000348	intron	opposite
1270	D1	P	11	109355284	109355785	501	-	0	0	RP11-708B6.2	ENSG00000255028	No description	109225812	109454633	0	-	0.000559	utr	same
1295	D1	P	12	486145	486646	501	-	0.284565	0.299542	KDM5A	ENSG00000073614	lysine (K)-specific demethylase 5A [Source:HGNC Symbol;Acc:9886]	389223	498620	0	-	0.603209	intron	same
1296	D1	P	12	896850	897463	613	+	0.0979608	0.159186	WNK1	ENSG00000060237	WNK lysine deficient protein kinase 1 [Source:HGNC Symbol;Acc:14540]	861759	1020618	0	+	0.657714	intron	same
1298	D1	P	12	1537247	1537868	621	+	0.0604381	0.0604381	ERC1	ENSG00000082805	ELKS/RAB6-interacting/CAST family member 1 [Source:HGNC Symbol;Acc:17072]	1099675	1605090	0	+	0.154843	intron	same
1306	D1	P	12	7506900	7507526	626	+	0	0	CD163L1	ENSG00000177675	CD163 molecule-like 1 [Source:HGNC Symbol;Acc:30375]	7499281	7632493	0	-	0.00761935	utr	opposite
1307	D1	P	12	9940785	9941398	613	+	0	0				0	NA	27288	NA	NA	NA	NA
1314	D1	P	12	44211375	44211876	501	-	0	0				0	NA	11197	NA	NA	NA	NA
1316	D1	P	12	46966868	46967369	501	-	0.0299542	0				0	NA	116817	NA	NA	NA	NA
1322	D1	P	12	50089936	50090548	612	+	0.0122651	0.0122651	FMNL3	ENSG00000161791	formin-like 3 [Source:HGNC Symbol;Acc:23698]	50031724	50101948	0	-	0.456409	intron	opposite
1325	D1	P	12	50901765	50902387	622	+	0.398251	0.33791	DIP2B	ENSG00000066084	DIP2 disco-interacting protein 2 homolog B (Drosophila) [Source:HGNC Symbol;Acc:29284]	50898768	51142450	0	+	0.444323	intron	same
1327	D1	P	12	51051324	51051825	501	+	0.149771	0.179725	DIP2B	ENSG00000066084	DIP2 disco-interacting protein 2 homolog B (Drosophila) [Source:HGNC Symbol;Acc:29284]	50898768	51142450	0	+	0.444323	intron	same
1338	D1	P	12	65587784	65588398	614	+	0.134477	0.134477	LEMD3	ENSG00000174106	LEM domain containing 3 [Source:HGNC Symbol;Acc:28887]	65563351	65642107	0	+	0.41718	intron	same
1352	D1	P	12	92766146	92766647	501	-	0	0				0	NA	47223	NA	NA	NA	NA
1373	D1	P	12	118636383	118637011	628	+	2.48624	1.99617	TAOK3	ENSG00000135090	TAO kinase 3 [Source:HGNC Symbol;Acc:18133]	118587606	118810750	0	-	0.346334	exon	opposite
1380	D1	P	12	121249039	121249660	621	+	0.314278	0.314278	SPPL3	ENSG00000157837	Signal peptide peptidase-like 3 [Source:UniProtKB/Swiss-Prot;Acc:Q8TCT6]	121200313	121342174	0	-	0.4445	intron	opposite
1385	D1	P	12	129696200	129696701	501	-	0	0	TMEM132D	ENSG00000151952	transmembrane protein 132D [Source:HGNC Symbol;Acc:29411]	129556270	130388211	0	-	0.000488	intron	same
1390	D1	P	13	20287314	20287815	501	-	0.793785	0.688946	PSPC1	ENSG00000121390	paraspeckle component 1 [Source:HGNC Symbol;Acc:20320]	20248896	20357142	0	-	0.39639	intron	same
1393	D1	P	13	21766578	21767079	501	+	0	0				0	NA	13355	NA	NA	NA	NA
1396	D1	P	13	31199920	31200421	501	-	0.449312	0.389404	USPL1	ENSG00000132952	ubiquitin specific peptidase like 1 [Source:HGNC Symbol;Acc:20294]	31191830	31233686	0	+	0.92039	intron	opposite
1410	D1	P	13	42892494	42892995	501	-	0.808762	0.793785	AKAP11	ENSG00000023516	A kinase (PRKA) anchor protein 11 [Source:HGNC Symbol;Acc:369]	42846289	42897396	0	+	0.745847	intron	opposite
1412	D1	P	13	46540454	46540955	501	-	0.0299542	0.0299542	ZC3H13	ENSG00000123200	zinc finger CCCH-type containing 13 [Source:HGNC Symbol;Acc:20368]	46528600	46626894	0	-	0.351314	intron	same
1415	D1	P	13	50102093	50102594	501	-	0.629037	0.793785	PHF11	ENSG00000136147	PHD finger protein 11 [Source:HGNC Symbol;Acc:17024]	50069746	50103123	0	+	1.27155	intron	opposite
1416	D1	P	13	51661109	51661610	501	+	0	0	LINC00371	ENSG00000226792	long intergenic non-protein coding RNA 371 [Source:HGNC Symbol;Acc:42693]	51659560	51685078	0	-	0.000589	utr	opposite
1420	D1	P	13	73371401	73372023	622	+	0	0	PIBF1	ENSG00000083535	progesterone immunomodulatory binding factor 1 [Source:HGNC Symbol;Acc:23352]	73356197	73590592	0	+	0.1956	intron	same
1441	D1	P	13	114918717	114919339	622	+	0.156887	0.156887				0	NA	20631	NA	NA	NA	NA
1451	D1	P	14	23224616	23225231	615	+	0.0122053	0.0122054	CTD-2555K7.2	ENSG00000258458	No description	23171820	23235771	0	-	0.00470259	utr	opposite
1453	D1	P	14	23970802	23971419	617	+	0.0851609	0.0729951	NGDN	ENSG00000129460	neuroguidin, EIF4E binding protein [Source:HGNC Symbol;Acc:20271]	23938897	23979071	0	+	0.589128	intron	same
1458	D1	P	14	36778134	36778747	613	+	0.477559	0.538785	MBIP	ENSG00000151332	MAP3K12 binding inhibitory protein 1 [Source:HGNC Symbol;Acc:20427]	36767770	36789882	0	-	0.689527	intron	opposite
1461	D1	P	14	38536817	38537318	501	+	0	0	CTD-2058B24.2	ENSG00000259048	No description	38503492	38663486	0	-	0.000376	utr	opposite
1464	D1	P	14	45574311	45574812	501	-	0.329496	0.314519	PRPF39	ENSG00000185246	PRP39 pre-mRNA processing factor 39 homolog (S. cerevisiae) [Source:HGNC Symbol;Acc:20314]	45553302	45585485	0	+	0.859917	intron	opposite
1473	D1	P	14	65983535	65984036	501	+	0.0449312	0.0599083	FUT8	ENSG00000033170	fucosyltransferase 8 (alpha (1,6) fucosyltransferase) [Source:HGNC Symbol;Acc:4019]	65877310	66210839	0	+	0.158269	utr	same
1480	D1	P	14	73841321	73841822	501	+	0.0149771	0.0149771	NUMB	ENSG00000133961	numb homolog (Drosophila) [Source:HGNC Symbol;Acc:8060]	73741815	73930348	0	-	0.184	utr	opposite
1492	D1	P	14	93788185	93788686	501	-	0.449312	0.449312	BTBD7	ENSG00000011114	BTB (POZ) domain containing 7 [Source:HGNC Symbol;Acc:18269]	93703896	93799438	0	-	0.227263	intron	same
1496	D1	P	14	97011385	97012007	622	+	0.47066	0.555138	PAPOLA	ENSG00000090060	poly(A) polymerase alpha [Source:HGNC Symbol;Acc:14981]	96967770	97033448	0	+	0.845157	intron	same
1509	D1	P	15	43782438	43782939	501	-	0.10484	0.119817	TP53BP1	ENSG00000067369	tumor protein p53 binding protein 1 [Source:HGNC Symbol;Acc:11999]	43699407	43802926	0	-	0.212148	intron	same
1517	D1	P	15	56479851	56480469	618	+	0.218631	0.25507	RFX7	ENSG00000181827	regulatory factor X, 7 [Source:HGNC Symbol;Acc:25777]	56379478	56535483	0	-	0.390657	intron	opposite
1518	D1	P	15	57017038	57017651	613	+	0.0122451	0.0244902	ZNF280D	ENSG00000137871	zinc finger protein 280D [Source:HGNC Symbol;Acc:25953]	56922379	57210769	0	-	0.092837	intron	opposite
1519	D1	P	15	60644594	60645210	616	+	0.0487423	0.0487423	ANXA2	ENSG00000182718	annexin A2 [Source:HGNC Symbol;Acc:537]	60639333	60695082	0	-	0.0323666	exon	opposite
1521	D1	P	15	60921883	60922505	622	+	0.398251	0.349978	RP11-219B17.1	ENSG00000245534	No description	60771377	60922836	0	+	0.884537	intron	same
1530	D1	P	15	76578197	76578698	501	-	0	0	ETFA	ENSG00000140374	electron-transfer-flavoprotein, alpha polypeptide [Source:HGNC Symbol;Acc:3481]	76507696	76603813	0	-	0.177328	intron	same
1532	D1	P	15	78747522	78748023	501	+	0.374427	0.46429	IREB2	ENSG00000136381	iron-responsive element binding protein 2 [Source:HGNC Symbol;Acc:6115]	78729773	78793798	0	+	1.0329	intron	same
1533	D1	P	15	79177904	79178405	501	-	0.913602	0.97351	MORF4L1	ENSG00000185787	mortality factor 4 like 1 [Source:HGNC Symbol;Acc:16989]	79102829	79190475	0	+	0.447179	intron	opposite
1557	D1	P	16	290488	290989	501	+	0.134794	0.10484	ITFG3	ENSG00000167930	integrin alpha FG-GAP repeat containing 3 [Source:HGNC Symbol;Acc:14163]	284545	319942	0	+	0.322846	utr	same
1565	D1	P	16	1880248	1880749	501	-	0.284565	0.329496	FAHD1	ENSG00000180185	fumarylacetoacetate hydrolase domain containing 1 [Source:HGNC Symbol;Acc:14169]	1876968	1890208	0	+	0.202711	intron	opposite
1566	D1	P	16	2044351	2044973	622	+	0.0120682	0.0120682	SYNGR3	ENSG00000127561	synaptogyrin 3 [Source:HGNC Symbol;Acc:11501]	2039946	2044276	75	+	0.0138878	NA	same
1584	D1	P	16	10556517	10557018	501	-	1.18319	1.28803	ATF7IP2	ENSG00000166669	activating transcription factor 7 interacting protein 2 [Source:HGNC Symbol;Acc:20397]	10479912	10577495	0	+	0.509816	intron	opposite
1606	D1	P	16	21247017	21247518	501	+	0	0	ANKS4B	ENSG00000175311	ankyrin repeat and sterile alpha motif domain containing 4B [Source:HGNC Symbol;Acc:26795]	21245016	21263750	0	+	0.00240784	intron	same
1607	D1	P	16	21247018	21247631	613	+	0	0	ANKS4B	ENSG00000175311	ankyrin repeat and sterile alpha motif domain containing 4B [Source:HGNC Symbol;Acc:26795]	21245016	21263750	0	+	0.00240784	intron	same
1608	D1	P	16	22396642	22397143	501	+	0.584106	0.524198				0	NA	10704	NA	NA	NA	NA
1614	D1	P	16	29811053	29811746	693	+	4.14926	4.11675	KIF22	ENSG00000079616	kinesin family member 22 [Source:HGNC Symbol;Acc:6391]	29802041	29816706	0	+	1.91525	exon	same
1615	D1	P	16	29811170	29811671	501	-	4.13367	4.23851	KIF22	ENSG00000079616	kinesin family member 22 [Source:HGNC Symbol;Acc:6391]	29802041	29816706	0	+	1.91525	exon	opposite
1616	D1	P	16	29811171	29811672	501	-	4.13367	4.25349	KIF22	ENSG00000079616	kinesin family member 22 [Source:HGNC Symbol;Acc:6391]	29802041	29816706	0	+	1.91525	exon	opposite
1617	D1	P	16	29811173	29811674	501	-	4.13367	4.26847	KIF22	ENSG00000079616	kinesin family member 22 [Source:HGNC Symbol;Acc:6391]	29802041	29816706	0	+	1.91525	intron	opposite
1618	D1	P	16	30092500	30093165	665	+	1.04988	0.959568	PPP4C	ENSG00000149923	protein phosphatase 4, catalytic subunit [Source:HGNC Symbol;Acc:9319]	30087311	30096698	0	+	1.71945	exon	same
1619	D1	P	16	30092617	30093118	501	-	0.943556	1.07835	PPP4C	ENSG00000149923	protein phosphatase 4, catalytic subunit [Source:HGNC Symbol;Acc:9319]	30087311	30096698	0	+	1.71945	exon	opposite
1620	D1	P	16	30092618	30093119	501	-	0.928579	1.06337	PPP4C	ENSG00000149923	protein phosphatase 4, catalytic subunit [Source:HGNC Symbol;Acc:9319]	30087311	30096698	0	+	1.71945	exon	opposite
1621	D1	P	16	30092620	30093121	501	-	0.928579	1.03342	PPP4C	ENSG00000149923	protein phosphatase 4, catalytic subunit [Source:HGNC Symbol;Acc:9319]	30087311	30096698	0	+	1.71945	exon	opposite
1622	D1	P	16	30092621	30093122	501	-	0.913602	1.00346	PPP4C	ENSG00000149923	protein phosphatase 4, catalytic subunit [Source:HGNC Symbol;Acc:9319]	30087311	30096698	0	+	1.71945	exon	opposite
1627	D1	P	16	30643710	30644332	622	+	0	0				0	NA	17891	NA	NA	NA	NA
1629	D1	P	16	30735498	30735999	501	+	9.55538	9.28579	SRCAP	ENSG00000080603	Snf2-related CREBBP activator protein [Source:HGNC Symbol;Acc:16974]	30709530	30762702	0	+	1.54448	exon	same
1630	D1	P	16	30735501	30736002	501	+	9.57035	9.28579	SRCAP	ENSG00000080603	Snf2-related CREBBP activator protein [Source:HGNC Symbol;Acc:16974]	30709530	30762702	0	+	1.54448	exon	same
1631	D1	P	16	30735503	30736116	613	+	9.02464	9.08587	SRCAP	ENSG00000080603	Snf2-related CREBBP activator protein [Source:HGNC Symbol;Acc:16974]	30709530	30762702	0	+	1.54448	exon	same
1639	D1	P	16	47561420	47562042	622	+	0.0362046	0.0362046	PHKB	ENSG00000102893	phosphorylase kinase, beta [Source:HGNC Symbol;Acc:8927]	47495210	47735434	0	+	0.157052	intron	same
1647	D1	P	16	54535313	54536024	711	+	0	0				0	NA	214638	NA	NA	NA	NA
1648	D1	P	16	54535409	54535910	501	+	0	0				0	NA	214734	NA	NA	NA	NA
1656	D1	P	16	67835215	67835828	613	+	0.183677	0.183677	RANBP10	ENSG00000141084	RAN binding protein 10 [Source:HGNC Symbol;Acc:29285]	67757005	67840555	0	-	0.27464	intron	opposite
1659	D1	P	16	68514531	68515032	501	+	0.0149771	0				0	NA	5964	NA	NA	NA	NA
1660	D1	P	16	68514536	68515149	613	+	0.0244902	0				0	NA	5969	NA	NA	NA	NA
1662	D1	P	16	70559872	70560373	501	-	0.509221	0.509221	SF3B3	ENSG00000189091	splicing factor 3b, subunit 3, 130kDa [Source:HGNC Symbol;Acc:10770]	70557691	70608820	0	+	0.882721	utr	opposite
1663	D1	P	16	78474766	78475379	613	+	0.134696	0.122451	WWOX	ENSG00000186153	WW domain containing oxidoreductase [Source:HGNC Symbol;Acc:12799]	78133551	79246031	0	+	0.106018	intron	same
1664	D1	P	16	78953398	78954020	622	+	0.144818	0.0965457	WWOX	ENSG00000186153	WW domain containing oxidoreductase [Source:HGNC Symbol;Acc:12799]	78133551	79246031	0	+	0.106018	intron	same
1668	D1	P	16	85599166	85599667	501	+	0.0449312	0.0449312				0	NA	45356	NA	NA	NA	NA
1669	D1	P	16	85599168	85599779	611	+	0.0491405	0.0491405				0	NA	45244	NA	NA	NA	NA
1691	D1	P	16	89519619	89520241	622	+	0.712024	0.724093	ANKRD11	ENSG00000167522	ankyrin repeat domain 11 [Source:HGNC Symbol;Acc:21316]	89334035	89556969	0	-	1.19403	utr	opposite
1692	D1	P	16	89519737	89520238	501	-	0.748854	0.748854	ANKRD11	ENSG00000167522	ankyrin repeat domain 11 [Source:HGNC Symbol;Acc:21316]	89334035	89556969	0	-	1.19403	utr	same
1693	D1	P	16	89519738	89520239	501	-	0.748854	0.748854	ANKRD11	ENSG00000167522	ankyrin repeat domain 11 [Source:HGNC Symbol;Acc:21316]	89334035	89556969	0	-	1.19403	utr	same
1698	D1	P	16	89955023	89955524	501	+	0.539175	0.7189	TCF25	ENSG00000141002	transcription factor 25 (basic helix-loop-helix) [Source:HGNC Symbol;Acc:29181]	89939970	89977792	0	+	2.15141	intron	same
1699	D1	P	17	1001863	1002364	501	+	0.0149771	0.0898625	ABR	ENSG00000159842	active BCR-related gene [Source:HGNC Symbol;Acc:81]	906758	1090616	0	-	0.204709	intron	opposite
1700	D1	P	17	1001868	1002481	613	+	0.0244902	0.0734706	ABR	ENSG00000159842	active BCR-related gene [Source:HGNC Symbol;Acc:81]	906758	1090616	0	-	0.204709	intron	opposite
1707	D1	P	17	2404641	2405263	622	+	0.663752	0.699956	METTL16	ENSG00000127804	methyltransferase like 16 [Source:HGNC Symbol;Acc:28484]	2319352	2415200	0	-	0.520456	intron	opposite
1708	D1	P	17	3990839	3991340	501	+	0.0898625	0.0599083	ZZEF1	ENSG00000074755	zinc finger, ZZ-type with EF-hand domain 1 [Source:HGNC Symbol;Acc:29027]	3907739	4046314	0	-	0.691105	intron	opposite
1715	D1	P	17	4952473	4952974	501	-	0.0599083	0.0748854	GPR172B	ENSG00000132517	G protein-coupled receptor 172B [Source:HGNC Symbol;Acc:30225]	4935895	4955304	0	-	0.0460948	utr	same
1718	D1	P	17	7473201	7473823	622	+	2.38951	2.29296	SENP3	ENSG00000161956	SUMO1/sentrin/SMT3 specific peptidase 3 [Source:HGNC Symbol;Acc:17862]	7465272	7475287	0	+	1.31438	exon	same
1727	D1	P	17	16090578	16091079	501	-	0.0149771	0.0299542	NCOR1	ENSG00000141027	nuclear receptor corepressor 1 [Source:HGNC Symbol;Acc:7672]	15934718	16119010	0	-	0.611457	intron	same
1729	D1	P	17	17158345	17158846	501	+	0.269587	0.314519	COPS3	ENSG00000141030	COP9 constitutive photomorphogenic homolog subunit 3 (Arabidopsis) [Source:HGNC Symbol;Acc:2239]	17150134	17184607	0	-	0.404342	intron	opposite
1731	D1	P	17	19822115	19822616	501	+	0.149771	0.0299542	AKAP10	ENSG00000108599	A kinase (PRKA) anchor protein 10 [Source:HGNC Symbol;Acc:368]	19807788	19881150	0	-	0.49438	intron	opposite
1732	D1	P	17	26963230	26963731	501	-	0.61406	0.599083	KIAA0100	ENSG00000007202	KIAA0100 [Source:HGNC Symbol;Acc:28960]	26941459	26972472	0	-	1.87271	intron	same
1733	D1	P	17	27258128	27258751	623	+	0.325319	0.361466	PHF12	ENSG00000109118	PHD finger protein 12 [Source:HGNC Symbol;Acc:20816]	27232268	27278789	0	-	1.70112	intron	opposite
1734	D1	P	17	27258246	27258747	501	-	0.374427	0.25461	PHF12	ENSG00000109118	PHD finger protein 12 [Source:HGNC Symbol;Acc:20816]	27232268	27278789	0	-	1.70112	intron	same
1744	D1	P	17	31021153	31021775	622	+	0	0	MYO1D	ENSG00000176658	myosin ID [Source:HGNC Symbol;Acc:7598]	30819628	31203902	0	-	0.0254742	intron	opposite
1745	D1	P	17	31021270	31021771	501	-	0	0	MYO1D	ENSG00000176658	myosin ID [Source:HGNC Symbol;Acc:7598]	30819628	31203902	0	-	0.0254742	intron	same
1749	D1	P	17	34940452	34941074	622	+	1.90678	1.8585	GGNBP2	ENSG00000005955	gametogenetin binding protein 2 [Source:HGNC Symbol;Acc:19357]	34900773	34946278	0	+	1.49722	intron	same
1752	D1	P	17	35664178	35664800	622	+	0.108614	0.13275	ACACA	ENSG00000132142	acetyl-CoA carboxylase alpha [Source:HGNC Symbol;Acc:84]	35441923	35766902	0	-	0.0984636	intron	opposite
1753	D1	P	17	35664296	35664797	501	-	0.134794	0.10484	ACACA	ENSG00000132142	acetyl-CoA carboxylase alpha [Source:HGNC Symbol;Acc:84]	35441923	35766902	0	-	0.0984636	intron	same
1754	D1	P	17	35664297	35664798	501	-	0.134794	0.10484	ACACA	ENSG00000132142	acetyl-CoA carboxylase alpha [Source:HGNC Symbol;Acc:84]	35441923	35766902	0	-	0.0984636	intron	same
1756	D1	P	17	37964281	37964895	614	+	0.0978016	0.0978016	IKZF3	ENSG00000161405	IKAROS family zinc finger 3 (Aiolos) [Source:HGNC Symbol;Acc:13178]	37913968	38020441	0	-	0.420079	intron	opposite
1760	D1	P	17	38953464	38953965	501	-	0	0	KRT28	ENSG00000173908	keratin 28 [Source:HGNC Symbol;Acc:30842]	38948064	38956211	0	-	0	intron	same
1763	D1	P	17	40420619	40421120	501	+	1.13826	1.15324	STAT5B	ENSG00000173757	signal transducer and activator of transcription 5B [Source:HGNC Symbol;Acc:11367]	40351186	40428725	0	-	1.02296	utr	opposite
1770	D1	P	17	42556628	42557242	614	+	0.207828	0.244504	GPATCH8	ENSG00000186566	G patch domain containing 8 [Source:HGNC Symbol;Acc:29066]	42472652	42580802	0	-	0.878783	intron	opposite
1774	D1	P	17	43233363	43233982	619	+	1.97664	2.07365	AC002117.1	ENSG00000224505	No description	43227985	43236822	0	-	1.21565	utr	opposite
1778	D1	P	17	45799554	45800169	615	+	0	0				0	NA	10127	NA	NA	NA	NA
1780	D1	P	17	47889206	47889819	613	+	0.257147	0.293882	KAT7	ENSG00000136504	K(lysine) acetyltransferase 7 [Source:HGNC Symbol;Acc:17016]	47865917	47906458	0	+	0.706934	intron	same
1787	D1	P	17	56467956	56468457	501	-	0.509221	0.509221	RNF43	ENSG00000108375	ring finger protein 43 [Source:HGNC Symbol;Acc:18505]	56429861	56494480	0	-	0.871108	intron	same
1789	D1	P	17	57830552	57831053	501	-	0.569129	0.554152	VMP1	ENSG00000062716	vacuole membrane protein 1 [Source:HGNC Symbol;Acc:29559]	57784863	57917950	0	+	0.281898	intron	opposite
1796	D1	P	17	62513058	62513559	501	-	3.22007	3.17514	CEP95	ENSG00000258890	centrosomal protein 95kDa [Source:HGNC Symbol;Acc:25141]	62502255	62534060	0	+	3.11344	intron	opposite
1807	D1	P	17	73987150	73987651	501	-	0.928579	0.853694	C17orf106	ENSG00000257949	CST complex subunit TEN1 [Source:UniProtKB/Swiss-Prot;Acc:Q86WV5]	73975301	73996667	0	+	0.148139	exon	opposite
1814	D1	P	17	74235234	74235735	501	+	0.149771	0.179725	RNF157	ENSG00000141576	ring finger protein 157 [Source:HGNC Symbol;Acc:29402]	74138534	74236390	0	-	0.788444	intron	opposite
1815	D1	P	17	74742494	74742995	501	+	0.404381	0.419358	MFSD11	ENSG00000092931	major facilitator superfamily domain containing 11 [Source:HGNC Symbol;Acc:25458]	74733783	74775336	0	+	0.434963	intron	same
1816	D1	P	17	74742499	74743112	613	+	0.355108	0.367353	MFSD11	ENSG00000092931	major facilitator superfamily domain containing 11 [Source:HGNC Symbol;Acc:25458]	74733783	74775336	0	+	0.434963	intron	same
1824	D1	P	17	76148198	76148817	619	+	0	0	C17orf99	ENSG00000187997	chromosome 17 open reading frame 99 [Source:HGNC Symbol;Acc:34490]	76142434	76162258	0	+	0.00758486	intron	same
1833	D1	P	17	78687967	78688468	501	+	0.0449312	0.0449312	RPTOR	ENSG00000141564	regulatory associated protein of MTOR, complex 1 [Source:HGNC Symbol;Acc:30287]	78518619	78940173	0	+	0.168257	intron	same
1837	D1	P	17	78793202	78793824	622	+	0.060341	0.0603411	RPTOR	ENSG00000141564	regulatory associated protein of MTOR, complex 1 [Source:HGNC Symbol;Acc:30287]	78518619	78940173	0	+	0.168257	intron	same
1849	D1	P	17	80252044	80252663	619	+	1.94026	2.07365	AC132872.2	ENSG00000244773	No description	80247922	80250690	1354	-	0.22265	NA	opposite
1850	D1	P	17	80378907	80379408	501	+	1.31798	1.2431	HEXDC	ENSG00000169660	hexosaminidase (glycosyl hydrolase family 20, catalytic domain) containing [Source:HGNC Symbol;Acc:26307]	80376252	80400515	0	+	1.14804	intron	same
1852	D1	P	17	80493885	80494386	501	-	0.314519	0.419358	FOXK2	ENSG00000141568	forkhead box K2 [Source:HGNC Symbol;Acc:6036]	80477589	80562483	0	+	0.415003	intron	opposite
1868	D1	P	18	20471883	20472498	615	+	0	0				0	NA	8989	NA	NA	NA	NA
1885	D1	P	18	43968753	43969254	501	+	0	0	RNF165	ENSG00000141622	ring finger protein 165 [Source:HGNC Symbol;Acc:31696]	43914187	44040783	0	+	0.00433541	intron	same
1894	D1	P	18	67828022	67828523	501	-	0.0449312	0.0599083	RTTN	ENSG00000176225	rotatin [Source:HGNC Symbol;Acc:18654]	67671045	67872962	0	-	0.150617	intron	same
1895	D1	P	18	73656479	73657101	622	+	0	0				0	NA	412543	NA	NA	NA	NA
1909	D1	P	19	1092276	1092777	501	-	0.404381	0.344473	POLR2E	ENSG00000099817	polymerase (RNA) II (DNA directed) polypeptide E, 25kDa [Source:HGNC Symbol;Acc:9192]	1086578	1095391	0	-	1.43307	intron	same
1921	D1	P	19	3759891	3760392	501	+	2.80071	3.10026	APBA3	ENSG00000011132	amyloid beta (A4) precursor protein-binding, family A, member 3 [Source:HGNC Symbol;Acc:580]	3750771	3761673	0	-	1.0654	exon	opposite
1922	D1	P	19	3759895	3760396	501	+	2.77076	3.0703	APBA3	ENSG00000011132	amyloid beta (A4) precursor protein-binding, family A, member 3 [Source:HGNC Symbol;Acc:580]	3750771	3761673	0	-	1.0654	exon	opposite
1923	D1	P	19	3759906	3760509	603	+	2.27795	2.47712	APBA3	ENSG00000011132	amyloid beta (A4) precursor protein-binding, family A, member 3 [Source:HGNC Symbol;Acc:580]	3750771	3761673	0	-	1.0654	exon	opposite
1924	D1	P	19	3979202	3979824	622	+	10.0407	9.66664	EEF2	ENSG00000167658	eukaryotic translation elongation factor 2 [Source:HGNC Symbol;Acc:3214]	3972316	3985461	0	-	7.57626	exon	opposite
1943	D1	P	19	6648650	6649151	501	-	0.0149771	0				0	NA	13997	NA	NA	NA	NA
1948	D1	P	19	8463762	8464263	501	+	0.539175	0.688946	RAB11B	ENSG00000185236	RAB11B, member RAS oncogene family [Source:HGNC Symbol;Acc:9761]	8455205	8469313	0	+	1.46757	intron	same
1952	D1	P	19	9441387	9442009	622	+	0.229296	0.241364	ZNF559	ENSG00000188321	zinc finger protein 559 [Source:HGNC Symbol;Acc:28197]	9434873	9454519	0	+	0.446969	utr	same
1954	D1	P	19	9922433	9923047	614	+	0.440107	0.501233	FBXL12	ENSG00000127452	F-box and leucine-rich repeat protein 12 [Source:HGNC Symbol;Acc:13611]	9920947	9929731	0	-	1.26321	intron	opposite
1957	D1	P	19	10475788	10476289	501	-	2.59104	2.41131	TYK2	ENSG00000105397	tyrosine kinase 2 [Source:HGNC Symbol;Acc:12440]	10461209	10491352	0	-	1.34936	exon	same
1959	D1	P	19	10725285	10725898	613	+	0.60001	0.710216	SLC44A2	ENSG00000129353	solute carrier family 44, member 2 [Source:HGNC Symbol;Acc:17292]	10713121	10755235	0	+	1.82022	intron	same
1969	D1	P	19	12588367	12588868	501	-	0.224656	0.269587	ZNF709	ENSG00000242852	zinc finger protein 709 [Source:HGNC Symbol;Acc:20629]	12571998	12624668	0	-	0.242951	intron	same
1973	D1	P	19	14482847	14483348	501	-	0	0				0	NA	8865	NA	NA	NA	NA
1978	D1	P	19	17214810	17215435	625	+	1.3932	1.3932	MYO9B	ENSG00000099331	myosin IXB [Source:HGNC Symbol;Acc:7609]	17212466	17324103	0	+	0.863996	intron	same
1979	D1	P	19	17214927	17215428	501	-	1.54264	1.54264	MYO9B	ENSG00000099331	myosin IXB [Source:HGNC Symbol;Acc:7609]	17212466	17324103	0	+	0.863996	intron	opposite
1980	D1	P	19	17214928	17215429	501	-	1.54264	1.54264	MYO9B	ENSG00000099331	myosin IXB [Source:HGNC Symbol;Acc:7609]	17212466	17324103	0	+	0.863996	intron	opposite
1981	D1	P	19	17214930	17215431	501	-	1.54264	1.55762	MYO9B	ENSG00000099331	myosin IXB [Source:HGNC Symbol;Acc:7609]	17212466	17324103	0	+	0.863996	intron	opposite
1982	D1	P	19	17214931	17215432	501	-	1.54264	1.55762	MYO9B	ENSG00000099331	myosin IXB [Source:HGNC Symbol;Acc:7609]	17212466	17324103	0	+	0.863996	intron	opposite
1983	D1	P	19	17257094	17257595	501	+	0.404381	0.419358	MYO9B	ENSG00000099331	myosin IXB [Source:HGNC Symbol;Acc:7609]	17212466	17324103	0	+	0.863996	intron	same
1985	D1	P	19	18198537	18199164	627	+	0.0119721	0.0119721	IL12RB1	ENSG00000096996	interleukin 12 receptor, beta 1 [Source:HGNC Symbol;Acc:5971]	18170371	18197697	840	-	0.323829	NA	opposite
1986	D1	P	19	18198655	18199156	501	-	0	0	IL12RB1	ENSG00000096996	interleukin 12 receptor, beta 1 [Source:HGNC Symbol;Acc:5971]	18170371	18197697	958	-	0.323829	NA	same
2001	D1	P	19	36384976	36385477	501	-	0.149771	0.134794	NFKBID	ENSG00000167604	nuclear factor of kappa light polypeptide gene enhancer in B-cells inhibitor, delta [Source:HGNC Symbol;Acc:15671]	36379143	36393185	0	-	0.248421	intron	same
2002	D1	P	19	37061053	37061675	622	+	0.374114	0.398251	ZNF529	ENSG00000186020	zinc finger protein 529 [Source:HGNC Symbol;Acc:29328]	37034518	37064197	0	-	0.986422	intron	opposite
2008	D1	P	19	40885712	40886334	622	+	0.0482728	0.0603411	PLD3	ENSG00000105223	phospholipase D family, member 3 [Source:HGNC Symbol;Acc:17158]	40854491	40886346	0	+	0.872784	exon	same
2009	D1	P	19	41238802	41239415	613	+	0.0979608	0.0244902	ITPKC	ENSG00000086544	inositol-trisphosphate 3-kinase C [Source:HGNC Symbol;Acc:14897]	41223008	41246763	0	+	0.0462073	exon	same
2013	D1	P	19	42366895	42367508	613	+	1.55513	1.56737	RPS19	ENSG00000105372	ribosomal protein S19 [Source:HGNC Symbol;Acc:10402]	42363988	42375482	0	+	1.85166	intron	same
2021	D1	P	19	45508156	45508777	621	+	1.06371	0.870308	RELB	ENSG00000104856	v-rel reticuloendotheliosis viral oncogene homolog B [Source:HGNC Symbol;Acc:9956]	45504695	45541452	0	+	0.527919	intron	same
2026	D1	P	19	46113361	46113862	501	+	0.0599083	0.0748854	EML2	ENSG00000125746	echinoderm microtubule associated protein like 2 [Source:HGNC Symbol;Acc:18035]	46112660	46148726	0	-	0.295803	intron	opposite
2027	D1	P	19	46116602	46117205	603	+	0.697079	0.734422	EML2	ENSG00000125746	echinoderm microtubule associated protein like 2 [Source:HGNC Symbol;Acc:18035]	46112660	46148726	0	-	0.295803	exon	opposite
2028	D1	P	19	46131656	46132157	501	+	0.0599083	0.10484	EML2	ENSG00000125746	echinoderm microtubule associated protein like 2 [Source:HGNC Symbol;Acc:18035]	46112660	46148726	0	-	0.295803	intron	opposite
2038	D1	P	19	47648440	47649054	614	+	0	0.0366756	SAE1	ENSG00000142230	SUMO1 activating enzyme subunit 1 [Source:HGNC Symbol;Acc:30660]	47634080	47713892	0	+	0.171729	intron	same
2039	D1	P	19	48189062	48189563	501	-	0.0898625	0.119817	GLTSCR1	ENSG00000063169	glioma tumor suppressor candidate region gene 1 [Source:HGNC Symbol;Acc:4332]	48111453	48206534	0	+	0.42178	intron	opposite
2051	D1	P	19	50280558	50281059	501	+	0.10484	0.10484	AP2A1	ENSG00000196961	adaptor-related protein complex 2, alpha 1 subunit [Source:HGNC Symbol;Acc:561]	50270180	50310369	0	+	0.445423	intron	same
2052	D1	P	19	50286144	50286645	501	-	0.0599083	0.0599083	AP2A1	ENSG00000196961	adaptor-related protein complex 2, alpha 1 subunit [Source:HGNC Symbol;Acc:561]	50270180	50310369	0	+	0.445423	intron	opposite
2053	D1	P	19	50341138	50341639	501	+	0.149771	0.239633	MED25	ENSG00000104973	mediator complex subunit 25 [Source:HGNC Symbol;Acc:28845]	50321536	50342036	0	+	0.627122	intron	same
2054	D1	P	19	50341142	50341756	614	+	0.195603	0.195603	MED25	ENSG00000104973	mediator complex subunit 25 [Source:HGNC Symbol;Acc:28845]	50321536	50342036	0	+	0.627122	intron	same
2055	D1	P	19	50341144	50341756	612	+	0.196241	0.196241	MED25	ENSG00000104973	mediator complex subunit 25 [Source:HGNC Symbol;Acc:28845]	50321536	50342036	0	+	0.627122	intron	same
2056	D1	P	19	50897485	50897986	501	-	0.0449312	0.0299542	POLD1	ENSG00000062822	polymerase (DNA directed), delta 1, catalytic subunit 125kDa [Source:HGNC Symbol;Acc:9175]	50887593	50921270	0	+	0.224586	utr	opposite
2075	D1	P	19	56927813	56928314	501	-	0.0149771	0	ZNF583	ENSG00000198440	zinc finger protein 583 [Source:HGNC Symbol;Acc:26427]	56915383	56938733	0	+	0.0354175	intron	opposite
2092	D1	P	20	31423905	31424518	613	+	1.54288	1.37145	MAPRE1	ENSG00000101367	microtubule-associated protein, RP/EB family, member 1 [Source:HGNC Symbol;Acc:6890]	31407699	31438211	0	+	0.766806	exon	same
2093	D1	P	20	32351149	32351650	501	+	0.0149771	0.0149771	ZNF341	ENSG00000131061	zinc finger protein 341 [Source:HGNC Symbol;Acc:15992]	32319463	32380075	0	+	0.0854642	intron	same
2095	D1	P	20	34323535	34324157	622	+	3.40324	3.21014	RBM39	ENSG00000131051	RNA binding motif protein 39 [Source:HGNC Symbol;Acc:15923]	34291531	34330234	0	-	2.76077	exon	opposite
2115	D1	P	21	15917465	15917966	501	-	0.0599083	0.0449312	SAMSN1	ENSG00000155307	SAM domain, SH3 domain and nuclear localization signals 1 [Source:HGNC Symbol;Acc:10528]	15857549	15955723	0	-	0.304339	intron	same
2116	D1	P	21	17234234	17234735	501	+	0.179725	0.194702	USP25	ENSG00000155313	ubiquitin specific peptidase 25 [Source:HGNC Symbol;Acc:12624]	17102344	17252377	0	+	0.50142	intron	same
2121	D1	P	21	25232485	25233104	619	+	0	0				0	NA	28010	NA	NA	NA	NA
2142	D1	P	21	46509556	46510178	622	+	0.0724092	0.0724092	ADARB1	ENSG00000197381	adenosine deaminase, RNA-specific, B1 [Source:HGNC Symbol;Acc:226]	46493768	46646478	0	+	0.249761	utr	same
2152	D1	P	22	36647518	36648140	622	+	0.0482728	0.0241364	APOL1	ENSG00000100342	apolipoprotein L, 1 [Source:HGNC Symbol;Acc:618]	36649056	36663576	916	+	0.297198	NA	same
2157	D1	P	22	39660035	39660536	501	+	0	0				0	NA	2972	NA	NA	NA	NA
2158	D1	P	22	39660050	39660648	598	+	0	0				0	NA	2987	NA	NA	NA	NA
2161	D1	P	22	40612987	40613488	501	+	0.733877	0.793785	TNRC6B	ENSG00000100354	trinucleotide repeat containing 6B [Source:HGNC Symbol;Acc:29190]	40440821	40731811	0	+	1.13734	intron	same
2167	D1	P	22	44504846	44505347	501	+	0.0449312	0.0449312	PARVB	ENSG00000188677	parvin, beta [Source:HGNC Symbol;Acc:14653]	44395091	44565106	0	+	0.0311767	intron	same
2168	D1	P	22	46103444	46104066	622	+	0.0241364	0.0362046	ATXN10	ENSG00000130638	ataxin 10 [Source:HGNC Symbol;Acc:10549]	46067678	46241187	0	+	0.186543	intron	same
2178	D1	P	22	50824543	50825044	501	+	0.539175	0.419358	PPP6R2	ENSG00000100239	protein phosphatase 6, regulatory subunit 2 [Source:HGNC Symbol;Acc:19253]	50781733	50883514	0	+	0.742897	utr	same
2179	D1	P	22	50824544	50825045	501	+	0.539175	0.419358	PPP6R2	ENSG00000100239	protein phosphatase 6, regulatory subunit 2 [Source:HGNC Symbol;Acc:19253]	50781733	50883514	0	+	0.742897	utr	same
2193	D1	P	X	22403713	22404335	622	+	0	0				0	NA	3097	NA	NA	NA	NA
2204	D1	P	X	47281111	47281612	501	+	0.149771	0.194702				0	NA	7407	NA	NA	NA	NA
2205	D1	P	X	48574268	48574769	501	-	0.0599083	0.0748854	AF196970.3	ENSG00000232828	No description	48557354	48595570	0	-	0.191223	utr	same
2209	D1	P	X	56416428	56417042	614	+	0	0.0122252				0	NA	102106	NA	NA	NA	NA
2215	D1	P	X	70759318	70759819	501	-	5.90097	5.91595	OGT	ENSG00000147162	O-linked N-acetylglucosamine (GlcNAc) transferase (UDP-N-acetylglucosamine:polypeptide-N-acetylglucosaminyl transferase) [Source:HGNC Symbol;Acc:8127]	70752933	70795747	0	+	4.57256	intron	opposite
2227	D1	P	X	115733095	115733596	501	-	0	0				0	NA	93282	NA	NA	NA	NA
2234	D1	P	X	137256425	137257038	613	+	0	0				0	NA	222472	NA	NA	NA	NA
114	D1	RL	1	154588566	154589067	501	+	0.7189	0.868671	ADAR	ENSG00000160710	adenosine deaminase, RNA-specific [Source:HGNC Symbol;Acc:225]	154554538	154600475	0	-	2.70524	intron	opposite
115	D1	RL	1	154588571	154589072	501	+	0.733877	0.868671	ADAR	ENSG00000160710	adenosine deaminase, RNA-specific [Source:HGNC Symbol;Acc:225]	154554538	154600475	0	-	2.70524	intron	opposite
116	D1	RL	1	154588571	154589184	613	+	0.722461	0.820422	ADAR	ENSG00000160710	adenosine deaminase, RNA-specific [Source:HGNC Symbol;Acc:225]	154554538	154600475	0	-	2.70524	intron	opposite
144	D1	RL	1	206739593	206740094	501	+	0.35945	0.389404	RASSF5	ENSG00000136653	Ras association (RalGDS/AF-6) domain family member 5 [Source:HGNC Symbol;Acc:17609]	206680879	206762616	0	+	0.722893	intron	same
145	D1	RL	1	206739599	206740211	612	+	0.331157	0.343422	RASSF5	ENSG00000136653	Ras association (RalGDS/AF-6) domain family member 5 [Source:HGNC Symbol;Acc:17609]	206680879	206762616	0	+	0.722893	intron	same
217	D1	RL	2	69804918	69805419	501	+	0.823739	0.913602	AAK1	ENSG00000115977	AP2 associated kinase 1 [Source:HGNC Symbol;Acc:19679]	69688532	69901481	0	-	1.22513	intron	opposite
218	D1	RL	2	69804923	69805536	613	+	0.759196	0.869402	AAK1	ENSG00000115977	AP2 associated kinase 1 [Source:HGNC Symbol;Acc:19679]	69688532	69901481	0	-	1.22513	intron	opposite
829	D1	RL	7	61969080	61969690	610	+	0	0.0123052				0	NA	502151	NA	NA	NA	NA
858	D1	RL	7	104683669	104684291	622	+	0.20516	0.229296	MLL5	ENSG00000005483	myeloid/lymphoid or mixed-lineage leukemia 5 (trithorax homolog, Drosophila) [Source:HGNC Symbol;Acc:18541]	104654626	104754808	0	+	1.33667	intron	same
859	D1	RL	7	104683786	104684287	501	-	0.209679	0.239633	MLL5	ENSG00000005483	myeloid/lymphoid or mixed-lineage leukemia 5 (trithorax homolog, Drosophila) [Source:HGNC Symbol;Acc:18541]	104654626	104754808	0	+	1.33667	intron	opposite
878	D1	RL	7	139450890	139451391	501	+	0.284565	0.25461	HIPK2	ENSG00000064393	homeodomain interacting protein kinase 2 [Source:HGNC Symbol;Acc:14402]	139246316	139477577	0	-	0.451314	intron	opposite
879	D1	RL	7	139450890	139451507	617	+	0.304146	0.267649	HIPK2	ENSG00000064393	homeodomain interacting protein kinase 2 [Source:HGNC Symbol;Acc:14402]	139246316	139477577	0	-	0.451314	intron	opposite
992	D1	RL	9	24471148	24471760	612	+	0	0				0	NA	71198	NA	NA	NA	NA
993	D1	RL	9	24471259	24471760	501	-	0	0				0	NA	71198	NA	NA	NA	NA
1779	D1	RL	17	46448866	46449367	501	-	0.0299542	0	SKAP1	ENSG00000141293	src kinase associated phosphoprotein 1 [Source:HGNC Symbol;Acc:15605]	46210802	46507594	0	-	0.873032	intron	same
1901	D1	RL	19	801780	802281	501	+	1.40785	1.30301	PTBP1	ENSG00000011304	polypyrimidine tract binding protein 1 [Source:HGNC Symbol;Acc:9583]	797392	812327	0	+	2.79829	intron	same
1902	D1	RL	19	801782	802283	501	+	1.40785	1.30301	PTBP1	ENSG00000011304	polypyrimidine tract binding protein 1 [Source:HGNC Symbol;Acc:9583]	797392	812327	0	+	2.79829	intron	same
1903	D1	RL	19	801783	802284	501	+	1.40785	1.30301	PTBP1	ENSG00000011304	polypyrimidine tract binding protein 1 [Source:HGNC Symbol;Acc:9583]	797392	812327	0	+	2.79829	intron	same
1904	D1	RL	19	801788	802398	610	+	1.24283	1.34127	PTBP1	ENSG00000011304	polypyrimidine tract binding protein 1 [Source:HGNC Symbol;Acc:9583]	797392	812327	0	+	2.79829	intron	same
1936	D1	RL	19	6250555	6251056	501	+	0.0299542	0.0299542	MLLT1	ENSG00000130382	myeloid/lymphoid or mixed-lineage leukemia (trithorax homolog, Drosophila); translocated to, 1 [Source:HGNC Symbol;Acc:7134]	6210393	6279959	0	-	0.300342	intron	opposite
1937	D1	RL	19	6250557	6251058	501	+	0.0299542	0.0299542	MLLT1	ENSG00000130382	myeloid/lymphoid or mixed-lineage leukemia (trithorax homolog, Drosophila); translocated to, 1 [Source:HGNC Symbol;Acc:7134]	6210393	6279959	0	-	0.300342	intron	opposite
1938	D1	RL	19	6250559	6251060	501	+	0.0299542	0.0299542	MLLT1	ENSG00000130382	myeloid/lymphoid or mixed-lineage leukemia (trithorax homolog, Drosophila); translocated to, 1 [Source:HGNC Symbol;Acc:7134]	6210393	6279959	0	-	0.300342	intron	opposite
1939	D1	RL	19	6250559	6251173	614	+	0.0244504	0.0244504	MLLT1	ENSG00000130382	myeloid/lymphoid or mixed-lineage leukemia (trithorax homolog, Drosophila); translocated to, 1 [Source:HGNC Symbol;Acc:7134]	6210393	6279959	0	-	0.300342	intron	opposite
1940	D1	RL	19	6250560	6251173	613	+	0.0244902	0.0244902	MLLT1	ENSG00000130382	myeloid/lymphoid or mixed-lineage leukemia (trithorax homolog, Drosophila); translocated to, 1 [Source:HGNC Symbol;Acc:7134]	6210393	6279959	0	-	0.300342	intron	opposite
2014	D1	RL	19	42624746	42625368	622	+	0.0482728	0.0482728	POU2F2	ENSG00000028277	POU class 2 homeobox 2 [Source:HGNC Symbol;Acc:9213]	42592650	42700737	0	-	0.313781	intron	opposite
2015	D1	RL	19	42624746	42625369	623	+	0.0481955	0.0481955	POU2F2	ENSG00000028277	POU class 2 homeobox 2 [Source:HGNC Symbol;Acc:9213]	42592650	42700737	0	-	0.313781	intron	opposite
2016	D1	RL	19	42624867	42625368	501	-	0.0599083	0.0599083	POU2F2	ENSG00000028277	POU class 2 homeobox 2 [Source:HGNC Symbol;Acc:9213]	42592650	42700737	0	-	0.313781	intron	same
2062	D1	RL	19	53591950	53592572	622	+	2.18435	2.25676	ZNF160	ENSG00000170949	zinc finger protein 160 [Source:HGNC Symbol;Acc:12948]	53569867	53606687	0	-	0.985831	utr	opposite
151	D2	L	1	213530164	213530665	501	-	0	0				0	NA	82048	NA	NA	NA	NA
156	D2	L	1	225649035	225649536	501	-	0.0149771	0.0149771	PARP1	ENSG00000143799	poly (ADP-ribose) polymerase 1 [Source:HGNC Symbol;Acc:270]	224102741	226595780	0	-	0.246734	intron	same
221	D2	L	2	76448944	76449445	501	-	0	0.0149771				0	NA	222760	NA	NA	NA	NA
252	D2	L	2	143673612	143674113	501	+	0	0	KYNU	ENSG00000115919	kynureninase [Source:HGNC Symbol;Acc:6469]	143635067	143799890	0	+	0.00287376	intron	same
441	D2	L	4	7490824	7491325	501	+	0	0	SORCS2	ENSG00000184985	sortilin-related VPS10 domain containing receptor 2 [Source:HGNC Symbol;Acc:16698]	7194265	7744554	0	+	0.0018718	intron	same
442	D2	L	4	9495602	9496103	501	+	0	0				0	NA	43362	NA	NA	NA	NA
498	D2	L	4	119293437	119294052	615	+	0	0				0	NA	19279	NA	NA	NA	NA
628	D2	L	5	148389191	148389812	621	+	0	0	SH3TC2	ENSG00000169247	SH3 domain and tetratricopeptide repeats 2 [Source:HGNC Symbol;Acc:29427]	148303202	148442726	0	-	0.000431	intron	opposite
656	D2	L	6	3102739	3103240	501	+	0.599083	0.494244	RIPK1	ENSG00000137275	receptor (TNFRSF)-interacting serine-threonine kinase 1 [Source:HGNC Symbol;Acc:10019]	3064092	3115421	0	+	1.08991	intron	same
657	D2	L	6	3102752	3103357	605	+	0.632745	0.558304	RIPK1	ENSG00000137275	receptor (TNFRSF)-interacting serine-threonine kinase 1 [Source:HGNC Symbol;Acc:10019]	3064092	3115421	0	+	1.08991	intron	same
767	D2	L	6	157777928	157778429	501	+	0	0				0	NA	23736	NA	NA	NA	NA
795	D2	L	7	17353631	17354253	622	+	0.0120682	0.0241364	AHR	ENSG00000106546	aryl hydrocarbon receptor [Source:HGNC Symbol;Acc:348]	17338246	17385776	0	+	0.432466	intron	same
796	D2	L	7	17353749	17354249	500	-	0.015007	0.015007	AHR	ENSG00000106546	aryl hydrocarbon receptor [Source:HGNC Symbol;Acc:348]	17338246	17385776	0	+	0.432466	intron	opposite
797	D2	L	7	17353749	17354250	501	-	0.0149771	0.0149771	AHR	ENSG00000106546	aryl hydrocarbon receptor [Source:HGNC Symbol;Acc:348]	17338246	17385776	0	+	0.432466	intron	opposite
798	D2	L	7	17353750	17354250	500	-	0.015007	0.015007	AHR	ENSG00000106546	aryl hydrocarbon receptor [Source:HGNC Symbol;Acc:348]	17338246	17385776	0	+	0.432466	intron	opposite
835	D2	L	7	73908225	73908839	614	+	0	0	GTF2IRD1	ENSG00000006704	GTF2I repeat domain containing 1 [Source:HGNC Symbol;Acc:4661]	73868120	74016931	0	+	0.00434502	utr	same
926	D2	L	8	57658113	57658613	500	-	0	0				0	NA	89089	NA	NA	NA	NA
927	D2	L	8	57658113	57658614	501	-	0	0				0	NA	89089	NA	NA	NA	NA
967	D2	L	8	133903012	133903632	620	+	0	0	TG	ENSG00000042832	thyroglobulin [Source:HGNC Symbol;Acc:11764]	133879203	134147147	0	+	0.361439	intron	same
968	D2	L	8	133903128	133903629	501	-	0	0	TG	ENSG00000042832	thyroglobulin [Source:HGNC Symbol;Acc:11764]	133879203	134147147	0	+	0.361439	intron	opposite
969	D2	L	8	133903129	133903630	501	-	0	0	TG	ENSG00000042832	thyroglobulin [Source:HGNC Symbol;Acc:11764]	133879203	134147147	0	+	0.361439	intron	opposite
974	D2	L	8	143212176	143212789	613	+	0	0				0	NA	66928	NA	NA	NA	NA
1009	D2	L	9	87915165	87915666	501	-	0	0				0	NA	245789	NA	NA	NA	NA
1018	D2	L	9	96796374	96796875	501	+	0.0898625	0.0599083	PTPDC1	ENSG00000158079	protein tyrosine phosphatase domain containing 1 [Source:HGNC Symbol;Acc:30184]	96793076	96872138	0	+	0.0738888	utr	same
1019	D2	L	9	96796379	96796880	501	+	0.0898625	0.0599083	PTPDC1	ENSG00000158079	protein tyrosine phosphatase domain containing 1 [Source:HGNC Symbol;Acc:30184]	96793076	96872138	0	+	0.0738888	utr	same
1020	D2	L	9	96796379	96796992	613	+	0.0857157	0.0489804	PTPDC1	ENSG00000158079	protein tyrosine phosphatase domain containing 1 [Source:HGNC Symbol;Acc:30184]	96793076	96872138	0	+	0.0738888	utr	same
1089	D2	L	10	54182963	54183583	620	+	0	0				0	NA	27054	NA	NA	NA	NA
1105	D2	L	10	73885879	73886380	501	+	0.164748	0.164748	ASCC1	ENSG00000138303	activating signal cointegrator 1 complex subunit 1 [Source:HGNC Symbol;Acc:24268]	73856278	73980083	0	-	0.220321	intron	opposite
1106	D2	L	10	73885884	73886497	613	+	0.134696	0.159186	ASCC1	ENSG00000138303	activating signal cointegrator 1 complex subunit 1 [Source:HGNC Symbol;Acc:24268]	73856278	73980083	0	-	0.220321	intron	opposite
1140	D2	L	10	126799564	126800065	501	-	0.0149771	0.0599083	CTBP2	ENSG00000175029	C-terminal binding protein 2 [Source:HGNC Symbol;Acc:2495]	126676421	126849739	0	-	0.0227742	utr	same
1178	D2	L	11	43410871	43411372	501	+	2.11177	2.03688	TTC17	ENSG00000052841	tetratricopeptide repeat domain 17 [Source:HGNC Symbol;Acc:25596]	43380482	43516483	0	+	0.942728	exon	same
1179	D2	L	11	43410876	43411489	613	+	1.83677	1.94697	TTC17	ENSG00000052841	tetratricopeptide repeat domain 17 [Source:HGNC Symbol;Acc:25596]	43380482	43516483	0	+	0.942728	intron	same
1478	D2	L	14	70845412	70845912	500	-	0.780363	0.765356	RP11-718G2.3	ENSG00000258644	No description	70793069	70883701	0	-	0.435764	intron	same
1479	D2	L	14	70845412	70845913	501	-	0.778808	0.763831	RP11-718G2.3	ENSG00000258644	No description	70793069	70883701	0	-	0.435764	intron	same
1554	D2	L	16	183478	183979	501	+	0.10484	0.0599083	NPRL3	ENSG00000103148	nitrogen permease regulator-like 3 (S. cerevisiae) [Source:HGNC Symbol;Acc:14124]	134273	188859	0	-	0.574765	intron	opposite
1555	D2	L	16	183482	183983	501	+	0.10484	0.0599083	NPRL3	ENSG00000103148	nitrogen permease regulator-like 3 (S. cerevisiae) [Source:HGNC Symbol;Acc:14124]	134273	188859	0	-	0.574765	intron	opposite
1556	D2	L	16	183483	184096	613	+	0.122451	0.0857157	NPRL3	ENSG00000103148	nitrogen permease regulator-like 3 (S. cerevisiae) [Source:HGNC Symbol;Acc:14124]	134273	188859	0	-	0.574765	intron	opposite
1626	D2	L	16	30497359	30497860	501	+	0	0.0149771	ITGAL	ENSG00000005844	integrin, alpha L (antigen CD11A (p180), lymphocyte function-associated antigen 1; alpha polypeptide) [Source:HGNC Symbol;Acc:6148]	30483983	30534505	0	+	1.20747	intron	same
1633	D2	L	16	31713319	31713820	501	+	0.269587	0.284565	KIAA0664L3	ENSG00000131797	KIAA0664-like 3 [Source:HGNC Symbol;Acc:28447]	31711911	31718758	0	+	2.22656	utr	same
1666	D2	L	16	82433836	82434451	615	+	0	0				0	NA	53474	NA	NA	NA	NA
1747	D2	L	17	32598200	32598817	617	+	0	0	CCL7	ENSG00000108688	chemokine (C-C motif) ligand 7 [Source:HGNC Symbol;Acc:10634]	32597240	32599261	0	+	0.00371835	exon	same
1800	D2	L	17	66100314	66100936	622	+	0.543069	0.494797	AC005332.1	ENSG00000237854	No description	66097708	66111659	0	+	0.491461	utr	same
1801	D2	L	17	66100431	66100932	501	-	0.509221	0.584106	AC005332.1	ENSG00000237854	No description	66097708	66111659	0	+	0.491461	utr	opposite
1811	D2	L	17	74195273	74195774	501	+	0.119817	0.179725	RNF157	ENSG00000141576	ring finger protein 157 [Source:HGNC Symbol;Acc:29402]	74138534	74236390	0	-	0.788444	intron	opposite
2213	D2	L	X	67179617	67180230	613	+	0	0				0	NA	81956	NA	NA	NA	NA
2217	D2	L	X	72534899	72535519	620	+	0	0				0	NA	81848	NA	NA	NA	NA
2218	D2	L	X	72535014	72535514	500	-	0	0				0	NA	81853	NA	NA	NA	NA
2232	D2	L	X	135814372	135814937	565	+	0.18597	0.159403	ARHGEF6	ENSG00000129675	Rac/Cdc42 guanine nucleotide exchange factor (GEF) 6 [Source:HGNC Symbol;Acc:685]	135747706	135864247	0	-	0.735966	intron	opposite
2233	D2	L	X	135814436	135814936	500	-	0.15007	0.195091	ARHGEF6	ENSG00000129675	Rac/Cdc42 guanine nucleotide exchange factor (GEF) 6 [Source:HGNC Symbol;Acc:685]	135747706	135864247	0	-	0.735966	intron	same
2251	D2	L	Y	19232005	19232578	573	+	0	0				0	NA	380260	NA	NA	NA	NA
4	D2	P	1	1336953	1337567	614	+	4.71892	4.00986	RP4-758J18.2	ENSG00000224870	No description	1334902	1337426	0	+	2.57267	exon	same
7	D2	P	1	8541649	8542150	501	+	0.0748854	0.0599083	RERE	ENSG00000142599	arginine-glutamic acid dipeptide (RE) repeats [Source:HGNC Symbol;Acc:9965]	8412457	8877702	0	-	0.266919	intron	opposite
8	D2	P	1	8578938	8579439	501	-	0.0299542	0.0299542	RERE	ENSG00000142599	arginine-glutamic acid dipeptide (RE) repeats [Source:HGNC Symbol;Acc:9965]	8412457	8877702	0	-	0.266919	intron	same
10	D2	P	1	8737711	8738413	702	+	0.0213897	0.0213897	RERE	ENSG00000142599	arginine-glutamic acid dipeptide (RE) repeats [Source:HGNC Symbol;Acc:9965]	8412457	8877702	0	-	0.266919	utr	opposite
12	D2	P	1	9859200	9859822	622	+	0.13275	0.168955	CLSTN1	ENSG00000171603	calsyntenin 1 [Source:HGNC Symbol;Acc:17447]	9789084	9884584	0	-	0.733419	intron	opposite
21	D2	P	1	24847848	24848349	501	+	2.63597	2.50117	RCAN3	ENSG00000117602	RCAN family member 3 [Source:HGNC Symbol;Acc:3042]	24829387	24863506	0	+	2.86395	intron	same
22	D2	P	1	24980038	24980657	619	+	0.145519	0.133393	SRRM1	ENSG00000133226	serine/arginine repetitive matrix 1 [Source:HGNC Symbol;Acc:16638]	24958207	24999758	0	+	1.13704	intron	same
26	D2	P	1	27025297	27025798	501	+	0.539175	0.494244	ARID1A	ENSG00000117713	AT rich interactive domain 1A (SWI-like) [Source:HGNC Symbol;Acc:11110]	27022524	27108595	0	+	1.15277	intron	same
36	D2	P	1	32384304	32384805	501	-	4.13367	4.44819	PTP4A2	ENSG00000184007	protein tyrosine phosphatase type IVA, member 2 [Source:HGNC Symbol;Acc:9635]	32372022	32410457	0	-	1.02891	exon	same
44	D2	P	1	35977113	35977614	501	+	0.0748854	0.0748854	KIAA0319L	ENSG00000142687	KIAA0319-like [Source:HGNC Symbol;Acc:30071]	35899091	36023551	0	-	0.462004	intron	opposite
48	D2	P	1	39792722	39793223	501	-	1.40785	1.57259	MACF1	ENSG00000127603	microtubule-actin crosslinking factor 1 [Source:HGNC Symbol;Acc:13664]	39546988	39952789	0	+	0.37772	exon	opposite
50	D2	P	1	40353919	40354420	501	-	0	0.0149771				0	NA	4736	NA	NA	NA	NA
52	D2	P	1	43149402	43149903	501	+	0.329496	0.269587	YBX1	ENSG00000065978	Y box binding protein 1 [Source:HGNC Symbol;Acc:8014]	43148098	43168023	0	+	2.13073	intron	same
54	D2	P	1	43916873	43917374	501	-	3.13021	3.47468	SZT2	ENSG00000198198	seizure threshold 2 homolog (mouse) [Source:HGNC Symbol;Acc:29040]	43886428	43918321	0	+	2.08624	exon	opposite
58	D2	P	1	48863190	48863691	501	+	0	0	SPATA6	ENSG00000132122	spermatogenesis associated 6 [Source:HGNC Symbol;Acc:18309]	48761044	48937845	0	-	0.0346153	intron	opposite
60	D2	P	1	52953773	52954391	618	+	1.62759	1.78549	ZCCHC11	ENSG00000134744	zinc finger, CCHC domain containing 11 [Source:HGNC Symbol;Acc:28981]	52873954	53019159	0	-	1.15103	intron	opposite
64	D2	P	1	66905377	66905990	613	+	0.0122451	0.0122451				0	NA	65118	NA	NA	NA	NA
79	D2	P	1	108272405	108272906	501	+	0	0	VAV3	ENSG00000134215	vav 3 guanine nucleotide exchange factor [Source:HGNC Symbol;Acc:12659]	108113782	108507766	0	-	0.0246555	intron	opposite
104	D2	P	1	151650864	151651365	501	+	0.119817	0.134794	SNX27	ENSG00000143376	sorting nexin family member 27 [Source:HGNC Symbol;Acc:20073]	151584541	151671567	0	+	0.201727	intron	same
106	D2	P	1	153910497	153910998	501	+	0.0449312	0.0299542	DENND4B	ENSG00000198837	DENN/MADD domain containing 4B [Source:HGNC Symbol;Acc:29044]	153901977	153919172	0	-	2.85026	intron	opposite
107	D2	P	1	154221019	154221641	622	+	0.518933	0.422387	UBAP2L	ENSG00000143569	ubiquitin associated protein 2-like [Source:HGNC Symbol;Acc:29877]	154192655	154243986	0	+	1.39613	intron	same
135	D2	P	1	183484755	183485256	501	-	0.97351	1.22812	SMG7	ENSG00000116698	smg-7 homolog, nonsense mediated mRNA decay factor (C. elegans) [Source:HGNC Symbol;Acc:16792]	183441351	183567381	0	+	0.330016	exon	opposite
150	D2	P	1	210046163	210046664	501	-	0	0				0	NA	20605	NA	NA	NA	NA
161	D2	P	1	229689930	229690431	501	+	1.00346	1.01844	ABCB10	ENSG00000135776	ATP-binding cassette, sub-family B (MDR/TAP), member 10 [Source:HGNC Symbol;Acc:41]	229652329	229694442	0	-	0.460422	intron	opposite
175	D2	P	2	1936277	1936899	622	+	0.0120682	0	MYT1L	ENSG00000186487	myelin transcription factor 1-like [Source:HGNC Symbol;Acc:7623]	1792885	2335032	0	-	0.0010401	intron	opposite
176	D2	P	2	1936394	1936895	501	-	0	0.0149771	MYT1L	ENSG00000186487	myelin transcription factor 1-like [Source:HGNC Symbol;Acc:7623]	1792885	2335032	0	-	0.0010401	intron	same
177	D2	P	2	1936395	1936896	501	-	0	0.0149771	MYT1L	ENSG00000186487	myelin transcription factor 1-like [Source:HGNC Symbol;Acc:7623]	1792885	2335032	0	-	0.0010401	intron	same
178	D2	P	2	1936396	1936897	501	-	0	0.0149771	MYT1L	ENSG00000186487	myelin transcription factor 1-like [Source:HGNC Symbol;Acc:7623]	1792885	2335032	0	-	0.0010401	intron	same
179	D2	P	2	1936398	1936899	501	-	0	0.0149771	MYT1L	ENSG00000186487	myelin transcription factor 1-like [Source:HGNC Symbol;Acc:7623]	1792885	2335032	0	-	0.0010401	intron	same
181	D2	P	2	3411768	3412269	501	-	0.269587	0.299542	TTC15	ENSG00000171853	tetratricopeptide repeat domain 15 [Source:HGNC Symbol;Acc:24284]	3383446	3488865	0	+	0.699358	intron	opposite
185	D2	P	2	17870090	17870704	614	+	0	0	SMC6	ENSG00000163029	structural maintenance of chromosomes 6 [Source:HGNC Symbol;Acc:20466]	17845079	17981509	0	-	0.110603	intron	opposite
196	D2	P	2	26978767	26979268	501	+	0	0.0299542				0	NA	7884	NA	NA	NA	NA
197	D2	P	2	26978924	26979425	501	+	0	0.0299542				0	NA	7727	NA	NA	NA	NA
198	D2	P	2	26978928	26979429	501	+	0	0.0299542				0	NA	7723	NA	NA	NA	NA
199	D2	P	2	26978929	26979430	501	+	0	0.0299542				0	NA	7722	NA	NA	NA	NA
200	D2	P	2	26978930	26979542	612	+	0	0.0245302				0	NA	7610	NA	NA	NA	NA
225	D2	P	2	85268022	85268523	501	+	0.149771	0.134794	KCMF1	ENSG00000176407	potassium channel modulatory factor 1 [Source:HGNC Symbol;Acc:20589]	85198216	85282560	0	+	0.544466	intron	same
263	D2	P	2	170670963	170671577	614	+	0.134477	0.110027	METTL5	ENSG00000138382	methyltransferase like 5 [Source:HGNC Symbol;Acc:25006]	170666591	170681441	0	-	0.739142	intron	opposite
270	D2	P	2	181849461	181850088	627	+	0.0359164	0.0359164	UBE2E3	ENSG00000170035	ubiquitin-conjugating enzyme E2E 3 [Source:HGNC Symbol;Acc:12479]	181831975	181941312	0	+	0.182499	intron	same
298	D2	P	2	217043523	217044245	722	+	0.0831922	0.0727932	XRCC5	ENSG00000079246	X-ray repair complementing defective repair in Chinese hamster cells 5 (double-strand-break rejoining) [Source:HGNC Symbol;Acc:12833]	216972187	217071026	0	+	0.674489	intron	same
299	D2	P	2	217043641	217044142	501	-	0.10484	0.0898625	XRCC5	ENSG00000079246	X-ray repair complementing defective repair in Chinese hamster cells 5 (double-strand-break rejoining) [Source:HGNC Symbol;Acc:12833]	216972187	217071026	0	+	0.674489	intron	opposite
301	D2	P	2	222346079	222346580	501	-	0	0.0149771	EPHA4	ENSG00000116106	EPH receptor A4 [Source:HGNC Symbol;Acc:3388]	222282747	222438922	0	-	0.0819363	intron	same
307	D2	P	2	228367783	228368403	620	+	0.0968566	0.0968566	AGFG1	ENSG00000173744	ArfGAP with FG repeats 1 [Source:HGNC Symbol;Acc:5175]	228336868	228421384	0	+	0.548695	intron	same
309	D2	P	2	230742468	230743089	621	+	0.157139	0.169227	TRIP12	ENSG00000153827	thyroid hormone receptor interactor 12 [Source:HGNC Symbol;Acc:12306]	230631930	230787955	0	-	0.634629	intron	opposite
311	D2	P	2	232859191	232859692	501	+	0.0449312	0.0449312	DIS3L2	ENSG00000144535	DIS3 mitotic control homolog (S. cerevisiae)-like 2 [Source:HGNC Symbol;Acc:28648]	232825955	233209060	0	+	0.145952	utr	same
319	D2	P	3	5910896	5911397	501	-	0	0				0	NA	93132	NA	NA	NA	NA
349	D2	P	3	49968468	49969089	621	+	0	0	MON1A	ENSG00000164077	MON1 homolog A (yeast) [Source:HGNC Symbol;Acc:28207]	49946302	49967606	862	-	0.0582282	NA	opposite
352	D2	P	3	51476353	51476946	593	+	0.202518	0.177204	VPRBP	ENSG00000145041	Vpr (HIV-1) binding protein [Source:HGNC Symbol;Acc:30911]	51433298	51534010	0	-	0.559895	intron	opposite
362	D2	P	3	58629841	58630458	617	+	0	0	FAM3D	ENSG00000198643	family with sequence similarity 3, member D [Source:HGNC Symbol;Acc:18665]	58619673	58652575	0	-	0.000914	intron	opposite
429	D2	P	3	197004164	197004786	622	+	0.0362046	0.0241364	DLG1	ENSG00000075711	discs, large homolog 1 (Drosophila) [Source:HGNC Symbol;Acc:2900]	196769431	197026171	0	-	0.225577	intron	opposite
446	D2	P	4	24573501	24574002	501	-	0.0748854	0.0748854	DHX15	ENSG00000109606	DEAH (Asp-Glu-Ala-His) box polypeptide 15 [Source:HGNC Symbol;Acc:2738]	24519064	24586173	0	-	1.15136	intron	same
455	D2	P	4	47900070	47900684	614	+	0.134477	0.195603	NFXL1	ENSG00000170448	nuclear transcription factor, X-box binding-like 1 [Source:HGNC Symbol;Acc:18726]	47849257	47916653	0	-	0.144687	exon	opposite
476	D2	P	4	82069157	82069658	501	-	0.0149771	0.0149771	PRKG2	ENSG00000138669	protein kinase, cGMP-dependent, type II [Source:HGNC Symbol;Acc:9416]	82009837	82136218	0	-	0.0131473	intron	same
480	D2	P	4	89232370	89232871	501	+	0.0149771	0.0149771	RP11-10L7.1	ENSG00000246375	No description	89206094	89252573	0	+	0.0241019	utr	same
493	D2	P	4	110361241	110361742	501	+	0.224656	0.179725	SEC24B	ENSG00000138802	SEC24 family, member B (S. cerevisiae) [Source:HGNC Symbol;Acc:10704]	110354928	110461612	0	+	0.669994	intron	same
495	D2	P	4	110402764	110403385	621	+	1.60765	1.30546	SEC24B	ENSG00000138802	SEC24 family, member B (S. cerevisiae) [Source:HGNC Symbol;Acc:10704]	110354928	110461612	0	+	0.669994	exon	same
516	D2	P	4	146819710	146820323	613	+	0.0122451	0.0122451	ZNF827	ENSG00000151612	zinc finger protein 827 [Source:HGNC Symbol;Acc:27193]	146678779	146859787	0	-	0.14758	intron	opposite
517	D2	P	4	146819822	146820323	501	-	0.0149771	0.0149771	ZNF827	ENSG00000151612	zinc finger protein 827 [Source:HGNC Symbol;Acc:27193]	146678779	146859787	0	-	0.14758	intron	same
523	D2	P	4	154313267	154313768	501	-	0	0	MND1	ENSG00000121211	meiotic nuclear divisions 1 homolog (S. cerevisiae) [Source:HGNC Symbol;Acc:24839]	154265801	154336270	0	+	0.0214448	intron	opposite
529	D2	P	4	170570423	170570924	501	-	0	0	CLCN3	ENSG00000109572	chloride channel 3 [Source:HGNC Symbol;Acc:2021]	170533784	170644824	0	+	0.102715	intron	opposite
542	D2	P	4	191031149	191031770	621	+	0	0				0	NA	17430	NA	NA	NA	NA
553	D2	P	5	16557852	16558353	501	-	0.0748854	0.10484	FAM134B	ENSG00000154153	family with sequence similarity 134, member B [Source:HGNC Symbol;Acc:25964]	16473147	16617167	0	-	0.671398	intron	same
566	D2	P	5	39024479	39024980	501	-	0.419358	0.35945	RICTOR	ENSG00000164327	RPTOR independent companion of MTOR, complex 2 [Source:HGNC Symbol;Acc:28611]	38938021	39074510	0	-	1.07189	intron	same
587	D2	P	5	77447873	77448486	613	+	0.0489804	0.0489804	AP3B1	ENSG00000132842	adaptor-related protein complex 3, beta 1 subunit [Source:HGNC Symbol;Acc:566]	77296349	77590579	0	-	0.137603	intron	opposite
594	D2	P	5	96076455	96076956	501	-	0.389404	0.344473	CAST	ENSG00000153113	calpastatin [Source:HGNC Symbol;Acc:1515]	95865525	96115299	0	+	0.359437	exon	opposite
597	D2	P	5	102344117	102344618	501	-	0.149771	0.119817	PAM	ENSG00000145730	peptidylglycine alpha-amidating monooxygenase [Source:HGNC Symbol;Acc:8596]	102089685	102366809	0	+	0.073903	intron	opposite
598	D2	P	5	102549487	102549988	501	-	0.0449312	0.0449312				0	NA	10550	NA	NA	NA	NA
617	D2	P	5	130706692	130707193	501	+	1.75232	1.75232	CDC42SE2	ENSG00000158985	CDC42 small effector 2 [Source:HGNC Symbol;Acc:18547]	130581186	130734140	0	+	1.60746	intron	same
618	D2	P	5	132217293	132218024	731	+	0.143796	0.184881	AFF4	ENSG00000072364	AF4/FMR2 family, member 4 [Source:HGNC Symbol;Acc:17869]	132211071	132299326	0	-	1.071	intron	opposite
619	D2	P	5	132217408	132217909	501	+	0.10484	0.10484	AFF4	ENSG00000072364	AF4/FMR2 family, member 4 [Source:HGNC Symbol;Acc:17869]	132211071	132299326	0	-	1.071	intron	opposite
620	D2	P	5	132217410	132217911	501	+	0.10484	0.10484	AFF4	ENSG00000072364	AF4/FMR2 family, member 4 [Source:HGNC Symbol;Acc:17869]	132211071	132299326	0	-	1.071	intron	opposite
621	D2	P	5	132217411	132217912	501	+	0.10484	0.10484	AFF4	ENSG00000072364	AF4/FMR2 family, member 4 [Source:HGNC Symbol;Acc:17869]	132211071	132299326	0	-	1.071	intron	opposite
643	D2	P	5	175288481	175289094	613	+	0.159186	0.110206	CPLX2	ENSG00000145920	complexin 2 [Source:HGNC Symbol;Acc:2310]	175223313	175311023	0	+	0.130807	utr	same
644	D2	P	5	176596820	176597321	501	-	0.0898625	0.119817	NSD1	ENSG00000165671	nuclear receptor binding SET domain protein 1 [Source:HGNC Symbol;Acc:14234]	176560026	176727216	0	+	0.48702	intron	opposite
646	D2	P	5	176857841	176858342	501	+	3.08528	2.74081	GRK6	ENSG00000198055	G protein-coupled receptor kinase 6 [Source:HGNC Symbol;Acc:4545]	176830205	176869902	0	+	0.77291	intron	same
647	D2	P	5	176857842	176858343	501	+	3.0703	2.74081	GRK6	ENSG00000198055	G protein-coupled receptor kinase 6 [Source:HGNC Symbol;Acc:4545]	176830205	176869902	0	+	0.77291	exon	same
648	D2	P	5	176857927	176858459	532	+	3.04689	2.5814	GRK6	ENSG00000198055	G protein-coupled receptor kinase 6 [Source:HGNC Symbol;Acc:4545]	176830205	176869902	0	+	0.77291	exon	same
649	D2	P	5	178050035	178050657	622	+	1.48439	1.35164	CLK4	ENSG00000113240	CDC-like kinase 4 [Source:HGNC Symbol;Acc:13659]	178029665	178057616	0	-	1.01217	exon	opposite
651	D2	P	5	179043421	179043922	501	+	13.0151	11.5923	HNRNPH1	ENSG00000169045	heterogeneous nuclear ribonucleoprotein H1 (H) [Source:HGNC Symbol;Acc:5041]	179041179	179061785	0	-	5.81464	exon	opposite
655	D2	P	5	179280799	179281300	501	-	0.0898625	0.10484	C5orf45	ENSG00000161010	chromosome 5 open reading frame 45 [Source:HGNC Symbol;Acc:30817]	179261436	179289173	0	-	1.43821	intron	same
674	D2	P	6	28259715	28260216	501	-	0.209679	0.179725	PGBD1	ENSG00000137338	piggyBac transposable element derived 1 [Source:HGNC Symbol;Acc:19398]	28249314	28270326	0	+	0.2247	intron	opposite
675	D2	P	6	30031194	30031695	501	-	0.0748854	0.0748854	ZNRD1	ENSG00000066379	zinc ribbon domain containing 1 [Source:HGNC Symbol;Acc:13182]	30026676	30032686	0	+	0.750474	intron	opposite
680	D2	P	6	30677293	30677908	615	+	0.15867	0.195286	MDC1	ENSG00000137337	mediator of DNA-damage checkpoint 1 [Source:HGNC Symbol;Acc:21163]	30667584	30685666	0	-	1.36375	intron	opposite
684	D2	P	6	31176699	31177200	501	+	0.329496	0.374427				0	NA	4954	NA	NA	NA	NA
688	D2	P	6	31662966	31663599	633	+	0.0711529	0.0474353	ABHD16A	ENSG00000204427	abhydrolase domain containing 16A [Source:HGNC Symbol;Acc:13921]	31654726	31671221	0	-	0.56334	intron	opposite
690	D2	P	6	32833461	32833962	501	+	0.224656	0.239633	PSMB9	ENSG00000240065	proteasome (prosome, macropain) subunit, beta type, 9 (large multifunctional peptidase 2) [Source:HGNC Symbol;Acc:9546]	32811913	32847364	0	+	1.85439	intron	same
696	D2	P	6	34660078	34660579	501	+	0.0149771	0.0299542	C6orf106	ENSG00000196821	chromosome 6 open reading frame 106 [Source:HGNC Symbol;Acc:21215]	34555065	34664636	0	-	0.236591	intron	opposite
697	D2	P	6	34731948	34732449	501	-	0.209679	0.119817	SNRPC	ENSG00000124562	small nuclear ribonucleoprotein polypeptide C [Source:HGNC Symbol;Acc:11157]	34725183	34741571	0	+	0.658768	intron	opposite
698	D2	P	6	34835906	34836524	618	+	0.0485848	0.0121462	UHRF1BP1	ENSG00000065060	UHRF1 binding protein 1 [Source:HGNC Symbol;Acc:21216]	34759857	34850915	0	+	0.388727	intron	same
699	D2	P	6	35292070	35292691	621	+	0.954921	0.942834				0	NA	2522	NA	NA	NA	NA
710	D2	P	6	43159206	43159707	501	+	0.0449312	0.0449312	CUL9	ENSG00000112659	cullin 9 [Source:HGNC Symbol;Acc:15982]	43149913	43192325	0	+	1.4864	intron	same
721	D2	P	6	73364633	73365134	501	+	0	0	KCNQ5	ENSG00000185760	potassium voltage-gated channel, KQT-like subfamily, member 5 [Source:HGNC Symbol;Acc:6299]	73331520	73908574	0	+	0.0278041	intron	same
727	D2	P	6	94063152	94063772	620	+	0	0	EPHA7	ENSG00000135333	EPH receptor A7 [Source:HGNC Symbol;Acc:3390]	93949738	94129265	0	-	0.000251	intron	opposite
729	D2	P	6	96033689	96034190	501	+	0	0	MANEA	ENSG00000172469	mannosidase, endo-alpha [Source:HGNC Symbol;Acc:21072]	96025419	96057333	0	+	0.110486	utr	same
730	D2	P	6	96038578	96039198	620	+	0.0121071	0.0242142	MANEA	ENSG00000172469	mannosidase, endo-alpha [Source:HGNC Symbol;Acc:21072]	96025419	96057333	0	+	0.110486	intron	same
737	D2	P	6	106728969	106729470	501	+	0.0748854	0.0898625	ATG5	ENSG00000057663	ATG5 autophagy related 5 homolog (S. cerevisiae) [Source:HGNC Symbol;Acc:589]	106632351	106773666	0	-	0.137584	intron	opposite
738	D2	P	6	108196074	108196575	501	+	0.404381	0.314519	SEC63	ENSG00000025796	SEC63 homolog (S. cerevisiae) [Source:HGNC Symbol;Acc:21082]	108188960	108279482	0	-	0.434965	intron	opposite
739	D2	P	6	108224509	108225122	613	+	0.110206	0.146941	SEC63	ENSG00000025796	SEC63 homolog (S. cerevisiae) [Source:HGNC Symbol;Acc:21082]	108188960	108279482	0	-	0.434965	intron	opposite
740	D2	P	6	108930669	108931170	501	-	0.449312	0.419358	FOXO3	ENSG00000118689	forkhead box O3 [Source:HGNC Symbol;Acc:3821]	108881038	109005977	0	+	0.252321	intron	opposite
750	D2	P	6	135316908	135317529	621	+	0.374716	0.374716	HBS1L	ENSG00000112339	HBS1-like (S. cerevisiae) [Source:HGNC Symbol;Acc:4834]	135281516	135424194	0	-	0.298044	intron	opposite
778	D2	P	6	168235109	168235610	501	+	0	0	MLLT4	ENSG00000130396	myeloid/lymphoid or mixed-lineage leukemia (trithorax homolog, Drosophila); translocated to, 4 [Source:HGNC Symbol;Acc:7137]	168227602	168372703	0	+	0.0177208	intron	same
790	D2	P	7	11115736	11116237	501	-	0.164748	0.209679	PHF14	ENSG00000106443	PHD finger protein 14 [Source:HGNC Symbol;Acc:22203]	11013499	11209250	0	+	0.172415	intron	opposite
804	D2	P	7	27822207	27822708	501	+	0.284565	0.314519	TAX1BP1	ENSG00000106052	Tax1 (human T-cell leukemia virus type I) binding protein 1 [Source:HGNC Symbol;Acc:11575]	27778950	27880938	0	+	0.430886	intron	same
812	D2	P	7	36443275	36443985	710	+	0.0105745	0.0105745	ANLN	ENSG00000011426	anillin, actin binding protein [Source:HGNC Symbol;Acc:14082]	36429415	36493400	0	+	0.0145703	intron	same
813	D2	P	7	36443392	36443893	501	-	0	0.0149771	ANLN	ENSG00000011426	anillin, actin binding protein [Source:HGNC Symbol;Acc:14082]	36429415	36493400	0	+	0.0145703	intron	opposite
814	D2	P	7	36443393	36443894	501	-	0	0.0149771	ANLN	ENSG00000011426	anillin, actin binding protein [Source:HGNC Symbol;Acc:14082]	36429415	36493400	0	+	0.0145703	intron	opposite
815	D2	P	7	36443395	36443896	501	-	0	0.0149771	ANLN	ENSG00000011426	anillin, actin binding protein [Source:HGNC Symbol;Acc:14082]	36429415	36493400	0	+	0.0145703	intron	opposite
816	D2	P	7	38248188	38248689	501	-	0.119817	0.0748854	STARD3NL	ENSG00000010270	STARD3 N-terminal like [Source:HGNC Symbol;Acc:19169]	38217824	38270272	0	+	0.118693	intron	opposite
833	D2	P	7	70190376	70190994	618	+	0.0242924	0.0364386	AUTS2	ENSG00000158321	autism susceptibility candidate 2 [Source:HGNC Symbol;Acc:14262]	69063905	70258054	0	+	0.00556576	intron	same
842	D2	P	7	86526683	86527184	501	-	0.25461	0.194702	KIAA1324L	ENSG00000164659	KIAA1324-like [Source:HGNC Symbol;Acc:21945]	86506222	86689015	0	-	0.0468893	exon	same
845	D2	P	7	92964976	92965477	501	+	0.374427	0.329496	CCDC132	ENSG00000004766	coiled-coil domain containing 132 [Source:HGNC Symbol;Acc:25956]	92861653	92988338	0	+	0.182078	intron	same
849	D2	P	7	99782817	99783318	501	-	0.0449312	0.0599083	STAG3	ENSG00000066923	stromal antigen 3 [Source:HGNC Symbol;Acc:11356]	99775186	99819111	0	+	0.806176	intron	opposite
850	D2	P	7	100276917	100277418	501	+	3.56454	2.03688	GIGYF1	ENSG00000146830	GRB10 interacting GYF protein 1 [Source:HGNC Symbol;Acc:9126]	100277130	100287071	0	-	3.72219	utr	opposite
874	D2	P	7	137689125	137689738	613	+	0	0	AKR1D1	ENSG00000122787	aldo-keto reductase family 1, member D1 (delta 4-3-ketosteroid-5-beta-reductase) [Source:HGNC Symbol;Acc:388]	137687070	137802732	0	+	0.00682536	utr	same
876	D2	P	7	138943851	138944352	501	-	0.224656	0.269587	UBN2	ENSG00000157741	ubinuclein 2 [Source:HGNC Symbol;Acc:21931]	138915102	138992981	0	+	0.194913	exon	opposite
925	D2	P	8	53842282	53842783	501	+	0	0				0	NA	8208	NA	NA	NA	NA
930	D2	P	8	66764509	66765128	619	+	0	0				0	NA	9952	NA	NA	NA	NA
947	D2	P	8	100558829	100559330	501	+	0	0.0149771	VPS13B	ENSG00000132549	vacuolar protein sorting 13 homolog B (yeast) [Source:HGNC Symbol;Acc:2183]	100025494	100889808	0	+	0.137276	intron	same
948	D2	P	8	101280376	101280877	501	+	0.449312	0.434335	RNF19A	ENSG00000034677	ring finger protein 19A [Source:HGNC Symbol;Acc:13432]	101269288	101348446	0	-	0.624396	intron	opposite
950	D2	P	8	101530107	101530608	501	+	0.314519	0.35945	ANKRD46	ENSG00000186106	ankyrin repeat domain 46 [Source:HGNC Symbol;Acc:27229]	101521980	101572012	0	-	0.312112	intron	opposite
979	D2	P	8	146001292	146001793	501	+	0.0599083	0.0599083	ZNF34	ENSG00000196378	zinc finger protein 34 [Source:HGNC Symbol;Acc:13098]	145997611	146012730	0	-	0.123816	intron	opposite
984	D2	P	9	5698477	5699096	619	+	0.776103	0.64271	KIAA1432	ENSG00000107036	KIAA1432 [Source:HGNC Symbol;Acc:17686]	5629025	5776557	0	+	0.484796	intron	same
1022	D2	P	9	100770004	100770623	619	+	1.96451	1.90388	ANP32B	ENSG00000136938	acidic (leucine-rich) nuclear phosphoprotein 32 family, member B [Source:HGNC Symbol;Acc:16677]	100745638	100778225	0	+	1.10166	intron	same
1037	D2	P	9	127946010	127946628	618	+	0.60731	0.704479	PPP6C	ENSG00000119414	protein phosphatase 6, catalytic subunit [Source:HGNC Symbol;Acc:9323]	127908852	127952218	0	-	1.16452	intron	opposite
1043	D2	P	9	131809310	131809811	501	+	0.0748854	0.0748854	FAM73B	ENSG00000148343	family with sequence similarity 73, member B [Source:HGNC Symbol;Acc:23621]	131798900	131834361	0	+	0.491452	intron	same
1046	D2	P	9	138788260	138788761	501	-	0.0299542	0.0299542	CAMSAP1	ENSG00000130559	calmodulin regulated spectrin-associated protein 1 [Source:HGNC Symbol;Acc:19946]	138700333	138799074	0	-	0.133783	intron	same
1049	D2	P	9	139712379	139712880	501	+	0.179725	0.134794	C9orf86	ENSG00000196642	chromosome 9 open reading frame 86 [Source:HGNC Symbol;Acc:24703]	139694818	139735639	0	+	0.968774	intron	same
1051	D2	P	9	139782769	139783270	501	+	0.179725	0.119817	TRAF2	ENSG00000127191	TNF receptor-associated factor 2 [Source:HGNC Symbol;Acc:12032]	139776364	139821059	0	+	0.204212	intron	same
1052	D2	P	9	139822484	139822985	501	-	0.209679	0.194702	TRAF2	ENSG00000127191	TNF receptor-associated factor 2 [Source:HGNC Symbol;Acc:12032]	139776364	139821059	1425	+	0.204212	NA	opposite
1061	D2	P	10	5832228	5832729	501	+	0.0748854	0.0599083	GDI2	ENSG00000057608	GDP dissociation inhibitor 2 [Source:HGNC Symbol;Acc:4227]	5807186	5884095	0	-	0.31204	intron	opposite
1079	D2	P	10	29302337	29302838	501	+	0	0				0	NA	131510	NA	NA	NA	NA
1097	D2	P	10	63725423	63725924	501	-	0	0	ARID5B	ENSG00000150347	AT rich interactive domain 5B (MRF1-like) [Source:HGNC Symbol;Acc:17362]	63661059	63856703	0	+	0.219931	intron	opposite
1122	D2	P	10	99914692	99915313	621	+	0.326365	0.435154	C10orf28	ENSG00000166024	chromosome 10 open reading frame 28 [Source:HGNC Symbol;Acc:23512]	99894387	100004654	0	+	0.245803	utr	same
1130	D2	P	10	106139604	106140105	501	+	0	0	CCDC147	ENSG00000120051	coiled-coil domain containing 147 [Source:HGNC Symbol;Acc:26676]	106113522	106214848	0	+	0.00140981	exon	same
1139	D2	P	10	124174353	124174854	501	+	0.0748854	0.0898625	PLEKHA1	ENSG00000107679	pleckstrin homology domain containing, family A (phosphoinositide binding specific) member 1 [Source:HGNC Symbol;Acc:14335]	124134173	124191867	0	+	0.723376	intron	same
1152	D2	P	11	3772927	3773599	672	+	0.826699	0.826699	NUP98	ENSG00000110713	nucleoporin 98kDa [Source:HGNC Symbol;Acc:8068]	3692313	3819022	0	-	0.660056	intron	opposite
1153	D2	P	11	3773045	3773546	501	-	0.808762	0.898625	NUP98	ENSG00000110713	nucleoporin 98kDa [Source:HGNC Symbol;Acc:8068]	3692313	3819022	0	-	0.660056	intron	same
1154	D2	P	11	3773046	3773547	501	-	0.808762	0.898625	NUP98	ENSG00000110713	nucleoporin 98kDa [Source:HGNC Symbol;Acc:8068]	3692313	3819022	0	-	0.660056	intron	same
1155	D2	P	11	3773047	3773548	501	-	0.808762	0.898625	NUP98	ENSG00000110713	nucleoporin 98kDa [Source:HGNC Symbol;Acc:8068]	3692313	3819022	0	-	0.660056	intron	same
1162	D2	P	11	13444929	13445430	501	+	0.209679	0.209679	BTBD10	ENSG00000148925	BTB (POZ) domain containing 10 [Source:HGNC Symbol;Acc:21445]	13409548	13484844	0	-	0.171444	intron	opposite
1182	D2	P	11	46800220	46800721	501	+	0.0149771	0	CKAP5	ENSG00000175216	cytoskeleton associated protein 5 [Source:HGNC Symbol;Acc:28959]	46764598	46867847	0	-	0.245762	intron	opposite
1185	D2	P	11	60172384	60172885	501	+	0.0149771	0.0149771	MS4A14	ENSG00000166928	membrane-spanning 4-domains, subfamily A, member 14 [Source:HGNC Symbol;Acc:30706]	60146003	60185161	0	+	0.00691197	intron	same
1187	D2	P	11	62491256	62491869	613	+	3.747	4.07762	RP11-831H9.16	ENSG00000234857	No description	62457747	62494856	0	-	0.947966	exon	opposite
1190	D2	P	11	62586002	62586503	501	+	1.22812	1.1083	STX5	ENSG00000162236	syntaxin 5 [Source:HGNC Symbol;Acc:11440]	62574369	62599560	0	-	1.08963	intron	opposite
1209	D2	P	11	65916974	65917475	501	-	0.389404	0.509221	PACS1	ENSG00000175115	phosphofurin acidic cluster sorting protein 1 [Source:HGNC Symbol;Acc:30032]	65837834	66012218	0	+	1.23126	intron	opposite
1212	D2	P	11	65963967	65964580	613	+	0.771442	0.746951	PACS1	ENSG00000175115	phosphofurin acidic cluster sorting protein 1 [Source:HGNC Symbol;Acc:30032]	65837834	66012218	0	+	1.23126	intron	same
1218	D2	P	11	66895792	66896293	501	+	0.209679	0.209679	KDM2A	ENSG00000173120	lysine (K)-specific demethylase 2A [Source:HGNC Symbol;Acc:13606]	66886740	67025141	0	+	0.885583	intron	same
1219	D2	P	11	66895792	66896411	619	+	0.242532	0.242532	KDM2A	ENSG00000173120	lysine (K)-specific demethylase 2A [Source:HGNC Symbol;Acc:13606]	66886740	67025141	0	+	0.885583	intron	same
1227	D2	P	11	67684915	67685416	501	-	0.0449312	0.10484				0	NA	11094	NA	NA	NA	NA
1240	D2	P	11	74465158	74465659	501	-	0.194702	0.149771	RNF169	ENSG00000166439	ring finger protein 169 [Source:HGNC Symbol;Acc:26961]	74459913	74553458	0	+	0.714589	intron	opposite
1293	D2	P	11	128357191	128357692	501	+	1.99195	1.99195	ETS1	ENSG00000134954	v-ets erythroblastosis virus E26 oncogene homolog 1 (avian) [Source:HGNC Symbol;Acc:3488]	128328656	128457437	0	-	1.43385	intron	opposite
1300	D2	P	12	3940748	3941368	620	+	0.0847495	0.0605354	PARP11	ENSG00000111224	poly (ADP-ribose) polymerase family, member 11 [Source:HGNC Symbol;Acc:1186]	3900213	3982608	0	-	0.322563	intron	opposite
1302	D2	P	12	6847535	6848148	613	+	0.269392	0.281637				0	NA	6494	NA	NA	NA	NA
1303	D2	P	12	6904330	6904831	501	+	2.69587	2.59104	CD4	ENSG00000010610	CD4 molecule [Source:HGNC Symbol;Acc:1678]	6896024	6929974	0	+	2.05308	utr	same
1304	D2	P	12	6906654	6907276	622	+	2.03953	1.96712	CD4	ENSG00000010610	CD4 molecule [Source:HGNC Symbol;Acc:1678]	6896024	6929974	0	+	2.05308	utr	same
1323	D2	P	12	50149265	50149885	620	+	2.62724	2.31245	TMBIM6	ENSG00000139644	transmembrane BAX inhibitor motif containing 6 [Source:HGNC Symbol;Acc:11723]	50101508	50158717	0	+	0.717549	exon	same
1324	D2	P	12	50149635	50150136	501	-	0.374427	0.374427	TMBIM6	ENSG00000139644	transmembrane BAX inhibitor motif containing 6 [Source:HGNC Symbol;Acc:11723]	50101508	50158717	0	+	0.717549	exon	opposite
1330	D2	P	12	53594927	53595428	501	-	1.12328	0.524198	ITGB7	ENSG00000139626	integrin, beta 7 [Source:HGNC Symbol;Acc:6162]	53585107	53601091	0	-	1.96981	utr	same
1335	D2	P	12	57735339	57735840	501	-	0.404381	0.389404	R3HDM2	ENSG00000179912	R3H domain containing 2 [Source:HGNC Symbol;Acc:29167]	57643392	57824788	0	-	0.499818	utr	same
1342	D2	P	12	70706818	70707438	620	+	0.0605354	0.0363212	CNOT2	ENSG00000111596	CCR4-NOT transcription complex, subunit 2 [Source:HGNC Symbol;Acc:7878]	70636774	70748773	0	+	0.559994	intron	same
1349	D2	P	12	82847735	82848236	501	-	0.0149771	0.0149771	C12orf26	ENSG00000127720	chromosome 12 open reading frame 26 [Source:HGNC Symbol;Acc:26228]	82752276	82873015	0	+	0.0832551	intron	opposite
1350	D2	P	12	91484490	91484991	501	-	0	0				0	NA	11415	NA	NA	NA	NA
1360	D2	P	12	100178822	100179323	501	+	0	0	ANKS1B	ENSG00000185046	ankyrin repeat and sterile alpha motif domain containing 1B [Source:HGNC Symbol;Acc:24600]	99120235	100378432	0	-	0.00409927	intron	opposite
1370	D2	P	12	112513693	112514194	501	+	0.0599083	0.0449312	NAA25	ENSG00000111300	N(alpha)-acetyltransferase 25, NatB auxiliary subunit [Source:HGNC Symbol;Acc:25783]	112464500	112546826	0	-	0.69416	intron	opposite
1374	D2	P	12	120349453	120350067	614	+	0	0				0	NA	34358	NA	NA	NA	NA
1375	D2	P	12	120489173	120489795	622	+	0.144818	0.144818	CCDC64	ENSG00000135127	coiled-coil domain containing 64 [Source:HGNC Symbol;Acc:28095]	120427648	120532298	0	+	0.354691	intron	same
1397	D2	P	13	33070683	33071302	619	+	0.618457	0.56995	N4BP2L2	ENSG00000244754	NEDD4 binding protein 2-like 2 [Source:HGNC Symbol;Acc:26916]	33006924	33112970	0	-	1.20058	intron	opposite
1404	D2	P	13	42741241	42741899	658	+	0.125498	0.136907	DGKH	ENSG00000102780	diacylglycerol kinase, eta [Source:HGNC Symbol;Acc:2854]	42614176	42830714	0	+	0.0692688	intron	same
1405	D2	P	13	42741358	42741859	501	-	0.164748	0.164748	DGKH	ENSG00000102780	diacylglycerol kinase, eta [Source:HGNC Symbol;Acc:2854]	42614176	42830714	0	+	0.0692688	intron	opposite
1406	D2	P	13	42741359	42741860	501	-	0.164748	0.164748	DGKH	ENSG00000102780	diacylglycerol kinase, eta [Source:HGNC Symbol;Acc:2854]	42614176	42830714	0	+	0.0692688	intron	opposite
1407	D2	P	13	42741360	42741861	501	-	0.164748	0.149771	DGKH	ENSG00000102780	diacylglycerol kinase, eta [Source:HGNC Symbol;Acc:2854]	42614176	42830714	0	+	0.0692688	intron	opposite
1411	D2	P	13	45798767	45799387	620	+	0.0605354	0.0726424	GTF2F2	ENSG00000188342	general transcription factor IIF, polypeptide 2, 30kDa [Source:HGNC Symbol;Acc:4653]	45694650	45858237	0	+	0.080246	intron	same
1429	D2	P	13	99727925	99728426	501	-	0.778808	0.599083	DOCK9	ENSG00000088387	dedicator of cytokinesis 9 [Source:HGNC Symbol;Acc:14132]	99445741	99738879	0	-	0.392905	intron	same
1438	D2	P	13	111339064	111339677	613	+	0.416334	0.404088	CARS2	ENSG00000134905	cysteinyl-tRNA synthetase 2, mitochondrial (putative) [Source:HGNC Symbol;Acc:25695]	111290133	111365950	0	-	1.01585	intron	opposite
1454	D2	P	14	35259674	35260175	501	-	1.39287	1.2431	BAZ1A	ENSG00000198604	bromodomain adjacent to zinc finger domain, 1A [Source:HGNC Symbol;Acc:960]	35221937	35344853	0	-	0.634549	intron	same
1455	D2	P	14	35521334	35521835	501	+	0.61406	0.673969	FAM177A1	ENSG00000151327	family with sequence similarity 177, member A1 [Source:HGNC Symbol;Acc:19829]	35514113	35582336	0	+	0.747838	intron	same
1463	D2	P	14	45416501	45417002	501	-	0.269587	0.269587	KLHL28	ENSG00000179454	kelch-like 28 (Drosophila) [Source:HGNC Symbol;Acc:19741]	45397672	45511525	0	-	0.324436	intron	same
1469	D2	P	14	58779039	58779540	501	+	0.10484	0.0898625	ARID4A	ENSG00000032219	AT rich interactive domain 4A (RBP1-like) [Source:HGNC Symbol;Acc:9885]	58765103	58840605	0	+	0.60036	intron	same
1491	D2	P	14	93750057	93750558	501	+	0.10484	0.149771	BTBD7	ENSG00000011114	BTB (POZ) domain containing 7 [Source:HGNC Symbol;Acc:18269]	93703896	93799438	0	-	0.227263	intron	opposite
1493	D2	P	14	93793631	93794244	613	+	0.146941	0.122451	BTBD7	ENSG00000011114	BTB (POZ) domain containing 7 [Source:HGNC Symbol;Acc:18269]	93703896	93799438	0	-	0.227263	intron	opposite
1502	D2	P	14	107186886	107187387	501	-	0	0				0	NA	3029	NA	NA	NA	NA
1505	D2	P	15	26060410	26060911	501	-	0.0898625	0.0599083	ATP10A	ENSG00000206190	ATPase, class V, type 10A [Source:HGNC Symbol;Acc:13542]	25922420	26110317	0	-	0.774985	intron	same
1523	D2	P	15	64804145	64804646	501	-	0.134794	0.134794	ZNF609	ENSG00000180357	zinc finger protein 609 [Source:HGNC Symbol;Acc:29003]	64791491	64978264	0	+	0.481766	intron	opposite
1535	D2	P	15	83686802	83687303	501	+	1.99195	1.90209	BTBD1	ENSG00000064726	BTB (POZ) domain containing 1 [Source:HGNC Symbol;Acc:1120]	83685174	83736106	0	-	0.724201	exon	opposite
1547	D2	P	15	99242286	99242908	622	+	0.374114	0.386183	IGF1R	ENSG00000140443	insulin-like growth factor 1 receptor [Source:HGNC Symbol;Acc:5465]	99192200	99507759	0	+	0.587784	intron	same
1548	D2	P	15	99242407	99242908	501	-	0.419358	0.344473	IGF1R	ENSG00000140443	insulin-like growth factor 1 receptor [Source:HGNC Symbol;Acc:5465]	99192200	99507759	0	+	0.587784	intron	opposite
1558	D2	P	16	383086	383587	501	-	0.164748	0.224656	AXIN1	ENSG00000103126	axin 1 [Source:HGNC Symbol;Acc:903]	337440	402673	0	-	0.542271	intron	same
1559	D2	P	16	397154	397767	613	+	0.55103	0.514294	AXIN1	ENSG00000103126	axin 1 [Source:HGNC Symbol;Acc:903]	337440	402673	0	-	0.542271	utr	opposite
1563	D2	P	16	1877558	1878184	626	+	0.98328	1.07921	FAHD1	ENSG00000180185	fumarylacetoacetate hydrolase domain containing 1 [Source:HGNC Symbol;Acc:14169]	1876968	1890208	0	+	0.202711	exon	same
1564	D2	P	16	1877675	1878176	501	-	1.21314	0.958533	FAHD1	ENSG00000180185	fumarylacetoacetate hydrolase domain containing 1 [Source:HGNC Symbol;Acc:14169]	1876968	1890208	0	+	0.202711	exon	opposite
1568	D2	P	16	2295263	2295934	671	+	0.0559412	0.0559412	ECI1	ENSG00000167969	enoyl-CoA delta isomerase 1 [Source:HGNC Symbol;Acc:2703]	2289396	2301615	0	-	0.218418	intron	opposite
1569	D2	P	16	2295316	2295817	501	+	0.0299542	0.0599083	ECI1	ENSG00000167969	enoyl-CoA delta isomerase 1 [Source:HGNC Symbol;Acc:2703]	2289396	2301615	0	-	0.218418	intron	opposite
1570	D2	P	16	2295319	2295820	501	+	0.0299542	0.0599083	ECI1	ENSG00000167969	enoyl-CoA delta isomerase 1 [Source:HGNC Symbol;Acc:2703]	2289396	2301615	0	-	0.218418	intron	opposite
1571	D2	P	16	2295320	2295821	501	+	0.0299542	0.0599083	ECI1	ENSG00000167969	enoyl-CoA delta isomerase 1 [Source:HGNC Symbol;Acc:2703]	2289396	2301615	0	-	0.218418	intron	opposite
1578	D2	P	16	2309132	2309633	501	+	3.32491	3.13021	RNPS1	ENSG00000205937	RNA binding protein S1, serine-rich domain [Source:HGNC Symbol;Acc:10080]	2303117	2318379	0	-	2.70632	intron	opposite
1581	D2	P	16	3893515	3894016	501	+	0.0449312	0.0449312	CREBBP	ENSG00000005339	CREB binding protein [Source:HGNC Symbol;Acc:2348]	3775055	3930722	0	-	0.905399	intron	opposite
1589	D2	P	16	11859213	11859714	501	-	2.56108	2.78574	ZC3H7A	ENSG00000122299	zinc finger CCCH-type containing 7A [Source:HGNC Symbol;Acc:30959]	11844442	11891099	0	-	1.03339	exon	same
1590	D2	P	16	11888568	11889069	501	-	0.479267	0.479267	ZC3H7A	ENSG00000122299	zinc finger CCCH-type containing 7A [Source:HGNC Symbol;Acc:30959]	11844442	11891099	0	-	1.03339	utr	same
1592	D2	P	16	14694282	14694783	501	-	0.209679	0.149771	PARN	ENSG00000140694	poly(A)-specific ribonuclease [Source:HGNC Symbol;Acc:8609]	14529559	14724124	0	-	0.190275	intron	same
1594	D2	P	16	15178528	15179029	501	+	0.748854	0.61406	PDXDC1	ENSG00000179889	pyridoxal-dependent decarboxylase domain containing 1 [Source:HGNC Symbol;Acc:28995]	15068599	15233195	0	+	0.551838	exon	same
1596	D2	P	16	16132502	16133142	640	+	0.269774	0.293233	ABCC1	ENSG00000103222	ATP-binding cassette, sub-family C (CFTR/MRP), member 1 [Source:HGNC Symbol;Acc:51]	16043434	16236931	0	+	0.737481	intron	same
1597	D2	P	16	16132524	16133025	501	+	0.269587	0.299542	ABCC1	ENSG00000103222	ATP-binding cassette, sub-family C (CFTR/MRP), member 1 [Source:HGNC Symbol;Acc:51]	16043434	16236931	0	+	0.737481	intron	same
1598	D2	P	16	16132525	16133026	501	+	0.269587	0.299542	ABCC1	ENSG00000103222	ATP-binding cassette, sub-family C (CFTR/MRP), member 1 [Source:HGNC Symbol;Acc:51]	16043434	16236931	0	+	0.737481	intron	same
1599	D2	P	16	16132528	16133029	501	+	0.269587	0.299542	ABCC1	ENSG00000103222	ATP-binding cassette, sub-family C (CFTR/MRP), member 1 [Source:HGNC Symbol;Acc:51]	16043434	16236931	0	+	0.737481	intron	same
1628	D2	P	16	30729250	30729751	501	+	0.374427	0.389404	SRCAP	ENSG00000080603	Snf2-related CREBBP activator protein [Source:HGNC Symbol;Acc:16974]	30709530	30762702	0	+	1.54448	intron	same
1640	D2	P	16	48620777	48621278	501	+	0.554152	0.658991	N4BP1	ENSG00000102921	NEDD4 binding protein 1 [Source:HGNC Symbol;Acc:29850]	48572639	48644120	0	-	0.931476	intron	opposite
1642	D2	P	16	50067915	50068416	501	+	0.868671	0.763831	TMEM188	ENSG00000205423	transmembrane protein 188 [Source:HGNC Symbol;Acc:26759]	50059152	50070988	0	+	0.934969	exon	same
1653	D2	P	16	67071022	67071523	501	-	0.0898625	0.10484	CBFB	ENSG00000067955	core-binding factor, beta subunit [Source:HGNC Symbol;Acc:1539]	67063050	67134961	0	+	0.288353	intron	opposite
1654	D2	P	16	67302588	67303210	622	+	0.168955	0.120682	SLC9A5	ENSG00000135740	solute carrier family 9 (sodium/hydrogen exchanger), member 5 [Source:HGNC Symbol;Acc:11078]	67282855	67306093	0	+	0.270147	intron	same
1655	D2	P	16	67302707	67303208	501	-	0.149771	0.179725	SLC9A5	ENSG00000135740	solute carrier family 9 (sodium/hydrogen exchanger), member 5 [Source:HGNC Symbol;Acc:11078]	67282855	67306093	0	+	0.270147	intron	opposite
1661	D2	P	16	69605747	69606360	613	+	0.0244902	0.0122451	NFAT5	ENSG00000102908	nuclear factor of activated T-cells 5, tonicity-responsive [Source:HGNC Symbol;Acc:7774]	69598997	69738569	0	+	0.336458	intron	same
1665	D2	P	16	80442605	80443106	501	-	0	0				0	NA	131748	NA	NA	NA	NA
1678	D2	P	16	89414070	89414699	629	+	0.429628	0.501233	ANKRD11	ENSG00000167522	ankyrin repeat domain 11 [Source:HGNC Symbol;Acc:21316]	89334035	89556969	0	-	1.19403	utr	opposite
1679	D2	P	16	89414187	89414688	501	-	0.584106	0.419358	ANKRD11	ENSG00000167522	ankyrin repeat domain 11 [Source:HGNC Symbol;Acc:21316]	89334035	89556969	0	-	1.19403	utr	same
1680	D2	P	16	89414188	89414689	501	-	0.584106	0.419358	ANKRD11	ENSG00000167522	ankyrin repeat domain 11 [Source:HGNC Symbol;Acc:21316]	89334035	89556969	0	-	1.19403	utr	same
1681	D2	P	16	89414875	89415376	501	-	0.509221	0.509221	ANKRD11	ENSG00000167522	ankyrin repeat domain 11 [Source:HGNC Symbol;Acc:21316]	89334035	89556969	0	-	1.19403	utr	same
1682	D2	P	16	89475541	89476201	660	+	0.989575	1.0692	ANKRD11	ENSG00000167522	ankyrin repeat domain 11 [Source:HGNC Symbol;Acc:21316]	89334035	89556969	0	-	1.19403	utr	opposite
1683	D2	P	16	89475583	89476084	501	+	1.16821	1.0484	ANKRD11	ENSG00000167522	ankyrin repeat domain 11 [Source:HGNC Symbol;Acc:21316]	89334035	89556969	0	-	1.19403	utr	opposite
1684	D2	P	16	89475584	89476085	501	+	1.16821	1.0484	ANKRD11	ENSG00000167522	ankyrin repeat domain 11 [Source:HGNC Symbol;Acc:21316]	89334035	89556969	0	-	1.19403	utr	opposite
1685	D2	P	16	89475584	89476201	617	+	1.00977	1.0341	ANKRD11	ENSG00000167522	ankyrin repeat domain 11 [Source:HGNC Symbol;Acc:21316]	89334035	89556969	0	-	1.19403	utr	opposite
1686	D2	P	16	89475588	89476089	501	+	1.18319	1.0484	ANKRD11	ENSG00000167522	ankyrin repeat domain 11 [Source:HGNC Symbol;Acc:21316]	89334035	89556969	0	-	1.19403	utr	opposite
1687	D2	P	16	89511452	89512171	719	+	0.741407	0.866715	ANKRD11	ENSG00000167522	ankyrin repeat domain 11 [Source:HGNC Symbol;Acc:21316]	89334035	89556969	0	-	1.19403	utr	opposite
1688	D2	P	16	89511569	89512070	501	-	0.988487	0.853694	ANKRD11	ENSG00000167522	ankyrin repeat domain 11 [Source:HGNC Symbol;Acc:21316]	89334035	89556969	0	-	1.19403	utr	same
1689	D2	P	16	89511570	89512071	501	-	0.988487	0.853694	ANKRD11	ENSG00000167522	ankyrin repeat domain 11 [Source:HGNC Symbol;Acc:21316]	89334035	89556969	0	-	1.19403	utr	same
1690	D2	P	16	89511573	89512074	501	-	0.988487	0.838716	ANKRD11	ENSG00000167522	ankyrin repeat domain 11 [Source:HGNC Symbol;Acc:21316]	89334035	89556969	0	-	1.19403	utr	same
1694	D2	P	16	89615680	89616288	608	+	2.50616	2.38271	SPG7	ENSG00000197912	spastic paraplegia 7 (pure and complicated autosomal recessive) [Source:HGNC Symbol;Acc:11237]	89574811	89624174	0	+	1.66837	exon	same
1697	D2	P	16	89876409	89876910	501	+	0.0748854	0.10484	FANCA	ENSG00000187741	Fanconi anemia, complementation group A [Source:HGNC Symbol;Acc:3582]	89803959	89883065	0	-	0.368668	intron	opposite
1709	D2	P	17	4107192	4107693	501	+	0.224656	0.164748	ANKFY1	ENSG00000185722	ankyrin repeat and FYVE domain containing 1 [Source:HGNC Symbol;Acc:20763]	4066665	4167274	0	-	0.59163	intron	opposite
1711	D2	P	17	4206401	4206902	501	-	0.419358	0.449312	UBE2G1	ENSG00000132388	ubiquitin-conjugating enzyme E2G 1 [Source:HGNC Symbol;Acc:12482]	4172512	4269969	0	-	0.581526	intron	same
1735	D2	P	17	27771000	27771625	625	+	0.0480415	0.0600519	TAOK1	ENSG00000160551	TAO kinase 1 [Source:HGNC Symbol;Acc:29259]	27717943	27871502	0	+	0.199958	utr	same
1736	D2	P	17	28584482	28585104	622	+	0.0724092	0.0362046	BLMH	ENSG00000108578	bleomycin hydrolase [Source:HGNC Symbol;Acc:1059]	28575223	28619074	0	-	0.401882	intron	opposite
1737	D2	P	17	28584599	28585100	501	-	0.0449312	0.0898625	BLMH	ENSG00000108578	bleomycin hydrolase [Source:HGNC Symbol;Acc:1059]	28575223	28619074	0	-	0.401882	intron	same
1738	D2	P	17	28756418	28756919	501	-	0	0.0149771	CPD	ENSG00000108582	carboxypeptidase D [Source:HGNC Symbol;Acc:2301]	28705942	28796730	0	+	0.166454	intron	opposite
1740	D2	P	17	29468746	29469247	501	+	0.0299542	0.0299542	NF1	ENSG00000196712	neurofibromin 1 [Source:HGNC Symbol;Acc:7765]	29421945	29708905	0	+	0.208241	intron	same
1741	D2	P	17	29623370	29623871	501	+	0.179725	0.149771	NF1	ENSG00000196712	neurofibromin 1 [Source:HGNC Symbol;Acc:7765]	29421945	29708905	0	+	0.208241	intron	same
1751	D2	P	17	35558146	35558759	613	+	0.0734706	0.0979608	ACACA	ENSG00000132142	acetyl-CoA carboxylase alpha [Source:HGNC Symbol;Acc:84]	35441923	35766902	0	-	0.0984636	intron	opposite
1757	D2	P	17	38005266	38005864	598	-	0.050207	0.0251035	IKZF3	ENSG00000161405	IKAROS family zinc finger 3 (Aiolos) [Source:HGNC Symbol;Acc:13178]	37913968	38020441	0	-	0.420079	intron	same
1765	D2	P	17	40508173	40508674	501	+	0.629037	0.644014	STAT3	ENSG00000168610	signal transducer and activator of transcription 3 (acute-phase response factor) [Source:HGNC Symbol;Acc:11364]	40465342	40540449	0	-	1.69744	utr	opposite
1795	D2	P	17	61721103	61721604	501	+	0.299542	0.299542	MAP3K3	ENSG00000198909	mitogen-activated protein kinase kinase kinase 3 [Source:HGNC Symbol;Acc:6855]	61699801	61773667	0	+	1.03372	intron	same
1827	D2	P	17	76751697	76752198	501	+	0.958533	1.0484	CYTH1	ENSG00000108669	cytohesin 1 [Source:HGNC Symbol;Acc:9501]	76670130	76778379	0	-	1.9414	intron	opposite
1828	D2	P	17	76757226	76757727	501	-	0.629037	0.61406	CYTH1	ENSG00000108669	cytohesin 1 [Source:HGNC Symbol;Acc:9501]	76670130	76778379	0	-	1.9414	intron	same
1838	D2	P	17	79227104	79227776	672	+	0.960758	0.994273	SLC38A10	ENSG00000157637	solute carrier family 38, member 10 [Source:HGNC Symbol;Acc:28237]	79218800	79269347	0	-	0.569673	intron	opposite
1839	D2	P	17	79227158	79227659	501	+	0.97351	0.943556	SLC38A10	ENSG00000157637	solute carrier family 38, member 10 [Source:HGNC Symbol;Acc:28237]	79218800	79269347	0	-	0.569673	intron	opposite
1840	D2	P	17	79227163	79227664	501	+	0.958533	0.958533	SLC38A10	ENSG00000157637	solute carrier family 38, member 10 [Source:HGNC Symbol;Acc:28237]	79218800	79269347	0	-	0.569673	intron	opposite
1841	D2	P	17	79227163	79227776	613	+	1.0041	1.0041	SLC38A10	ENSG00000157637	solute carrier family 38, member 10 [Source:HGNC Symbol;Acc:28237]	79218800	79269347	0	-	0.569673	intron	opposite
1842	D2	P	17	79251464	79251965	501	+	0.269587	0.209679	SLC38A10	ENSG00000157637	solute carrier family 38, member 10 [Source:HGNC Symbol;Acc:28237]	79218800	79269347	0	-	0.569673	intron	opposite
1843	D2	P	17	79527993	79528494	501	+	0.97351	0.883648	NPLOC4	ENSG00000182446	nuclear protein localization 4 homolog (S. cerevisiae) [Source:HGNC Symbol;Acc:18261]	79523915	79616376	0	-	0.431373	intron	opposite
1844	D2	P	17	80082206	80082828	622	+	2.06366	2.00332	CCDC57	ENSG00000176155	coiled-coil domain containing 57 [Source:HGNC Symbol;Acc:27564]	80059346	80170689	0	-	0.805707	intron	opposite
1845	D2	P	17	80082323	80082824	501	-	1.99195	2.02191	CCDC57	ENSG00000176155	coiled-coil domain containing 57 [Source:HGNC Symbol;Acc:27564]	80059346	80170689	0	-	0.805707	intron	same
1846	D2	P	17	80082327	80082828	501	-	2.00693	2.09679	CCDC57	ENSG00000176155	coiled-coil domain containing 57 [Source:HGNC Symbol;Acc:27564]	80059346	80170689	0	-	0.805707	intron	same
1853	D2	P	17	80508411	80509024	613	+	0.0244902	0.0244902	FOXK2	ENSG00000141568	forkhead box K2 [Source:HGNC Symbol;Acc:6036]	80477589	80562483	0	+	0.415003	intron	same
1859	D2	P	17	81004471	81004972	501	+	0.0449312	0.0149771	B3GNTL1	ENSG00000175711	UDP-GlcNAc:betaGal beta-1,3-N-acetylglucosaminyltransferase-like 1 [Source:HGNC Symbol;Acc:21727]	80901672	81009686	0	-	0.196985	intron	opposite
1860	D2	P	18	2288650	2289151	501	-	0	0				0	NA	248373	NA	NA	NA	NA
1871	D2	P	18	23865676	23866298	622	+	2.22055	2.34123	TAF4B	ENSG00000141384	TAF4b RNA polymerase II, TATA box binding protein (TBP)-associated factor, 105kDa [Source:HGNC Symbol;Acc:11538]	23806409	23971642	0	+	0.201392	exon	same
1872	D2	P	18	23865793	23866294	501	-	2.81569	2.63597	TAF4B	ENSG00000141384	TAF4b RNA polymerase II, TATA box binding protein (TBP)-associated factor, 105kDa [Source:HGNC Symbol;Acc:11538]	23806409	23971642	0	+	0.201392	exon	opposite
1890	D2	P	18	57569776	57570392	616	+	1.94969	1.63287	PMAIP1	ENSG00000141682	phorbol-12-myristate-13-acetate-induced protein 1 [Source:HGNC Symbol;Acc:9108]	57567180	57571538	0	+	0.941752	exon	same
1899	D2	P	19	630607	631253	646	+	0.313755	0.302134	POLRMT	ENSG00000099821	polymerase (RNA) mitochondrial (DNA directed) [Source:HGNC Symbol;Acc:9200]	617223	633568	0	-	0.846785	intron	opposite
1900	D2	P	19	630635	631136	501	+	0.344473	0.314519	POLRMT	ENSG00000099821	polymerase (RNA) mitochondrial (DNA directed) [Source:HGNC Symbol;Acc:9200]	617223	633568	0	-	0.846785	intron	opposite
1912	D2	P	19	1475232	1475852	620	+	0.484283	0.411641	C19orf25	ENSG00000119559	chromosome 19 open reading frame 25 [Source:HGNC Symbol;Acc:26711]	1473203	1479228	0	-	0.592646	exon	opposite
1927	D2	P	19	4414229	4414849	620	+	0.121071	0.157392	CHAF1A	ENSG00000167670	chromatin assembly factor 1, subunit A (p150) [Source:HGNC Symbol;Acc:1910]	4402659	4443394	0	+	0.183643	intron	same
1947	D2	P	19	8244950	8245451	501	+	0.0599083	0.0299542				0	NA	26169	NA	NA	NA	NA
1953	D2	P	19	9768029	9768530	501	-	0.119817	0.149771	ZNF562	ENSG00000171466	zinc finger protein 562 [Source:HGNC Symbol;Acc:25950]	9759363	9785776	0	-	0.364625	intron	same
1960	D2	P	19	10774126	10774744	618	+	0.170047	0.206485	ILF3	ENSG00000129351	interleukin enhancer binding factor 3, 90kDa [Source:HGNC Symbol;Acc:6038]	10764937	10803093	0	+	2.66084	utr	same
1961	D2	P	19	10774831	10775453	622	+	0.060341	0.0482728	ILF3	ENSG00000129351	interleukin enhancer binding factor 3, 90kDa [Source:HGNC Symbol;Acc:6038]	10764937	10803093	0	+	2.66084	utr	same
1964	D2	P	19	11152347	11152966	619	+	0.630583	0.60633	SMARCA4	ENSG00000127616	SWI/SNF related, matrix associated, actin dependent regulator of chromatin, subfamily a, member 4 [Source:HGNC Symbol;Acc:11100]	11071598	11172958	0	+	0.500016	intron	same
1965	D2	P	19	11152347	11152969	622	+	0.627547	0.60341	SMARCA4	ENSG00000127616	SWI/SNF related, matrix associated, actin dependent regulator of chromatin, subfamily a, member 4 [Source:HGNC Symbol;Acc:11100]	11071598	11172958	0	+	0.500016	intron	same
1966	D2	P	19	11152465	11152966	501	-	0.61406	0.644014	SMARCA4	ENSG00000127616	SWI/SNF related, matrix associated, actin dependent regulator of chromatin, subfamily a, member 4 [Source:HGNC Symbol;Acc:11100]	11071598	11172958	0	+	0.500016	intron	opposite
1967	D2	P	19	11152466	11152967	501	-	0.61406	0.644014	SMARCA4	ENSG00000127616	SWI/SNF related, matrix associated, actin dependent regulator of chromatin, subfamily a, member 4 [Source:HGNC Symbol;Acc:11100]	11071598	11172958	0	+	0.500016	intron	opposite
1968	D2	P	19	11152467	11152968	501	-	0.61406	0.629037	SMARCA4	ENSG00000127616	SWI/SNF related, matrix associated, actin dependent regulator of chromatin, subfamily a, member 4 [Source:HGNC Symbol;Acc:11100]	11071598	11172958	0	+	0.500016	intron	opposite
1972	D2	P	19	13038777	13039390	613	+	0.942873	0.893893	FARSA	ENSG00000179115	phenylalanyl-tRNA synthetase, alpha subunit [Source:HGNC Symbol;Acc:3592]	13033284	13044558	0	-	0.602813	exon	opposite
1975	D2	P	19	15398413	15398914	501	-	0.763831	0.793785	AC020911.1	ENSG00000246896	No description	15050246	16748905	0	+	0.342609	utr	opposite
2003	D2	P	19	37070954	37071455	501	-	1.03342	1.15324	AC092295.7	ENSG00000233527	No description	37063972	37085608	0	+	0.548328	utr	opposite
2004	D2	P	19	38140958	38141577	619	+	0.060633	0.060633	ZFP30	ENSG00000120784	zinc finger protein 30 homolog (mouse) [Source:HGNC Symbol;Acc:29555]	38123389	38147162	0	-	0.269128	utr	opposite
2011	D2	P	19	42047722	42048223	501	-	0	0	CEACAM21	ENSG00000007129	carcinoembryonic antigen-related cell adhesion molecule 21 [Source:HGNC Symbol;Acc:28834]	42041702	42093197	0	+	0.724606	utr	opposite
2012	D2	P	19	42066638	42067251	613	+	1.21227	1.27349	CEACAM21	ENSG00000007129	carcinoembryonic antigen-related cell adhesion molecule 21 [Source:HGNC Symbol;Acc:28834]	42041702	42093197	0	+	0.724606	utr	same
2018	D2	P	19	43987453	43988067	614	+	0.158928	0.171153	PHLDB3	ENSG00000176531	pleckstrin homology-like domain, family B, member 3 [Source:HGNC Symbol;Acc:30499]	43979255	44009087	0	-	0.589725	intron	opposite
2019	D2	P	19	44422387	44422888	501	-	0.0748854	0.0599083	ZNF45	ENSG00000124459	zinc finger protein 45 [Source:HGNC Symbol;Acc:13111]	44416776	44439411	0	-	0.248779	intron	same
2022	D2	P	19	45929896	45930397	501	+	0.0299542	0.0149771	ERCC1	ENSG00000012061	excision repair cross-complementing rodent repair deficiency, complementation group 1 (includes overlapping antisense sequence) [Source:HGNC Symbol;Acc:3433]	45910591	45982086	0	-	0.359751	utr	opposite
2031	D2	P	19	46211211	46211869	658	+	0.0342268	0.0228179				0	NA	2018	NA	NA	NA	NA
2032	D2	P	19	46211316	46211817	501	+	0.0299542	0.0149771				0	NA	2070	NA	NA	NA	NA
2033	D2	P	19	46211319	46211820	501	+	0.0299542	0.0149771				0	NA	2067	NA	NA	NA	NA
2037	D2	P	19	47602827	47603328	501	-	0.0149771	0.0149771	ZC3H4	ENSG00000130749	zinc finger CCCH-type containing 4 [Source:HGNC Symbol;Acc:17808]	47567449	47617009	0	-	0.373642	intron	same
2041	D2	P	19	49483360	49483980	620	+	0.593247	0.617461	GYS1	ENSG00000104812	glycogen synthase 1 (muscle) [Source:HGNC Symbol;Acc:4706]	49471382	49496567	0	-	0.587784	intron	opposite
2042	D2	P	19	49483477	49483978	501	-	0.688946	0.569129	GYS1	ENSG00000104812	glycogen synthase 1 (muscle) [Source:HGNC Symbol;Acc:4706]	49471382	49496567	0	-	0.587784	intron	same
2064	D2	P	19	54061062	54061563	501	+	6.60489	6.11065	ZNF331	ENSG00000130844	zinc finger protein 331 [Source:HGNC Symbol;Acc:15489]	54024235	54083523	0	+	2.4581	utr	same
2065	D2	P	19	54373934	54374435	501	+	0.434335	0.389404	MYADM	ENSG00000179820	myeloid-associated differentiation marker [Source:HGNC Symbol;Acc:7544]	54369477	54379691	0	+	1.7488	utr	same
2066	D2	P	19	54374173	54374791	618	+	0.388678	0.315801	MYADM	ENSG00000179820	myeloid-associated differentiation marker [Source:HGNC Symbol;Acc:7544]	54369477	54379691	0	+	1.7488	utr	same
2067	D2	P	19	54374178	54374791	613	+	0.391843	0.318373	MYADM	ENSG00000179820	myeloid-associated differentiation marker [Source:HGNC Symbol;Acc:7544]	54369477	54379691	0	+	1.7488	utr	same
2079	D2	P	19	59094359	59094860	501	-	0.913602	0.853694				0	NA	9417	NA	NA	NA	NA
2085	D2	P	20	2969262	2969879	617	+	0.170322	0.158156	PTPRA	ENSG00000132670	protein tyrosine phosphatase, receptor type, A [Source:HGNC Symbol;Acc:9664]	2844830	3019320	0	+	0.405072	intron	same
2086	D2	P	20	2969374	2969875	501	-	0.164748	0.179725	PTPRA	ENSG00000132670	protein tyrosine phosphatase, receptor type, A [Source:HGNC Symbol;Acc:9664]	2844830	3019320	0	+	0.405072	intron	opposite
2091	D2	P	20	30970111	30970724	613	+	0.55103	0.55103	ASXL1	ENSG00000171456	additional sex combs like 1 (Drosophila) [Source:HGNC Symbol;Acc:18318]	30946147	31027122	0	+	1.25707	intron	same
2107	D2	P	20	60968066	60968567	501	-	0.449312	0.404381	CABLES2	ENSG00000149679	Cdk5 and Abl enzyme substrate 2 [Source:HGNC Symbol;Acc:16143]	60963686	60982341	0	-	0.382453	exon	same
2108	D2	P	20	61572376	61572998	622	+	3.31876	2.86017	C20orf11	ENSG00000101193	chromosome 20 open reading frame 11 [Source:HGNC Symbol;Acc:15857]	61569471	61578019	0	+	2.30682	exon	same
2109	D2	P	20	61572494	61572995	501	-	2.90555	3.57952	C20orf11	ENSG00000101193	chromosome 20 open reading frame 11 [Source:HGNC Symbol;Acc:15857]	61569471	61578019	0	+	2.30682	exon	opposite
2110	D2	P	20	61572553	61573054	501	-	2.96546	3.51961	C20orf11	ENSG00000101193	chromosome 20 open reading frame 11 [Source:HGNC Symbol;Acc:15857]	61569471	61578019	0	+	2.30682	exon	opposite
2127	D2	P	21	34972066	34972567	501	+	0.0748854	0.0748854	AP000304.12	ENSG00000249209	No description	34956993	35284635	0	-	0.0916053	intron	opposite
2128	D2	P	21	34972066	34972679	613	+	0.0612255	0.0612255	AP000304.12	ENSG00000249209	No description	34956993	35284635	0	-	0.0916053	intron	opposite
2129	D2	P	21	34997299	34997928	629	+	0.119341	0.107407	AP000304.12	ENSG00000249209	No description	34956993	35284635	0	-	0.0916053	intron	opposite
2130	D2	P	21	34997365	34997866	501	-	0.119817	0.0898625	AP000304.12	ENSG00000249209	No description	34956993	35284635	0	-	0.0916053	intron	same
2131	D2	P	21	34997366	34997867	501	-	0.119817	0.0898625	AP000304.12	ENSG00000249209	No description	34956993	35284635	0	-	0.0916053	intron	same
2132	D2	P	21	34997367	34997868	501	-	0.119817	0.0898625	AP000304.12	ENSG00000249209	No description	34956993	35284635	0	-	0.0916053	intron	same
2133	D2	P	21	34997369	34997870	501	-	0.119817	0.0898625	AP000304.12	ENSG00000249209	No description	34956993	35284635	0	-	0.0916053	intron	same
2140	D2	P	21	45501994	45502614	620	+	0.472176	0.435855	MX2	ENSG00000183486	myxovirus (influenza virus) resistance 2 (mouse) [Source:HGNC Symbol;Acc:7533]	42733870	45746674	0	+	0.286772	intron	same
2144	D2	P	21	47932247	47932748	501	+	0.149771	0.179725	DIP2A	ENSG00000160305	DIP2 disco-interacting protein 2 homolog A (Drosophila) [Source:HGNC Symbol;Acc:17217]	47878812	47989926	0	+	1.23088	intron	same
2148	D2	P	22	30611435	30612056	621	+	0	0.0241752	MTMR3	ENSG00000100330	myotubularin related protein 3 [Source:HGNC Symbol;Acc:7451]	30279144	31521442	0	+	0.295293	utr	same
2150	D2	P	22	31930874	31931375	501	-	0.913602	1.15324	SFI1	ENSG00000198089	Sfi1 homolog, spindle assembly associated (yeast) [Source:HGNC Symbol;Acc:29064]	31884674	32014572	0	+	1.43437	intron	opposite
2166	D2	P	22	43339059	43339694	635	+	0.118215	0.130037	PACSIN2	ENSG00000100266	protein kinase C and casein kinase substrate in neurons 2 [Source:HGNC Symbol;Acc:8571]	43231418	43411151	0	-	0.226182	utr	opposite
2169	D2	P	22	46114098	46114720	622	+	0.748229	0.699956	ATXN10	ENSG00000130638	ataxin 10 [Source:HGNC Symbol;Acc:10549]	46067678	46241187	0	+	0.186543	exon	same
2170	D2	P	22	46114216	46114717	501	-	0.868671	0.913602	ATXN10	ENSG00000130638	ataxin 10 [Source:HGNC Symbol;Acc:10549]	46067678	46241187	0	+	0.186543	exon	opposite
2185	D2	P	X	13010709	13011338	629	+	0	0				0	NA	15363	NA	NA	NA	NA
2186	D2	P	X	13056381	13056882	501	+	0	0	FAM9C	ENSG00000187268	family with sequence similarity 9, member C [Source:HGNC Symbol;Acc:18405]	13053737	13062801	0	-	0.00331759	exon	opposite
2194	D2	P	X	30688982	30689603	621	+	0.0483504	0.0483504	GK	ENSG00000198814	glycerol kinase [Source:HGNC Symbol;Acc:4289]	30671476	30748725	0	+	0.0261809	intron	same
2195	D2	P	X	30689095	30689596	501	-	0.0599083	0.0599083	GK	ENSG00000198814	glycerol kinase [Source:HGNC Symbol;Acc:4289]	30671476	30748725	0	+	0.0261809	intron	opposite
2196	D2	P	X	30689096	30689597	501	-	0.0599083	0.0449312	GK	ENSG00000198814	glycerol kinase [Source:HGNC Symbol;Acc:4289]	30671476	30748725	0	+	0.0261809	intron	opposite
2241	D2	P	X	153689848	153690469	621	+	1.01536	0.979097	PLXNA3	ENSG00000130827	plexin A3 [Source:HGNC Symbol;Acc:9101]	153686621	153701989	0	+	1.33453	exon	same
2242	D2	P	X	153689849	153690350	501	+	1.0484	1.01844	PLXNA3	ENSG00000130827	plexin A3 [Source:HGNC Symbol;Acc:9101]	153686621	153701989	0	+	1.33453	exon	same
2243	D2	P	X	153689849	153690469	620	+	1.01699	0.980673	PLXNA3	ENSG00000130827	plexin A3 [Source:HGNC Symbol;Acc:9101]	153686621	153701989	0	+	1.33453	exon	same
2244	D2	P	X	153689850	153690469	619	+	1.01863	0.982255	PLXNA3	ENSG00000130827	plexin A3 [Source:HGNC Symbol;Acc:9101]	153686621	153701989	0	+	1.33453	exon	same
2245	D2	P	X	153689853	153690469	616	+	1.02359	0.987031	PLXNA3	ENSG00000130827	plexin A3 [Source:HGNC Symbol;Acc:9101]	153686621	153701989	0	+	1.33453	exon	same
2246	D2	P	X	153689854	153690355	501	+	1.0484	1.01844	PLXNA3	ENSG00000130827	plexin A3 [Source:HGNC Symbol;Acc:9101]	153686621	153701989	0	+	1.33453	exon	same
2247	D2	P	X	153689938	153690469	531	+	0.763155	0.862083	PLXNA3	ENSG00000130827	plexin A3 [Source:HGNC Symbol;Acc:9101]	153686621	153701989	0	+	1.33453	exon	same
206	D2	RL	2	29228526	29229027	501	-	0	0	FAM179A	ENSG00000189350	family with sequence similarity 179, member A [Source:HGNC Symbol;Acc:33715]	29179477	29275096	0	+	0.0290927	intron	opposite
236	D2	RL	2	109382070	109382571	501	+	4.19358	4.55303	RANBP2	ENSG00000153201	RAN binding protein 2 [Source:HGNC Symbol;Acc:9848]	109335937	109402267	0	+	0.987829	exon	same
345	D2	RL	3	48877377	48877878	501	+	0.479267	0.494244	PRKAR2A	ENSG00000114302	protein kinase, cAMP-dependent, regulatory, type II, alpha [Source:HGNC Symbol;Acc:9391]	48782030	48885279	0	-	0.427589	intron	opposite
346	D2	RL	3	48877382	48877995	613	+	0.379598	0.428579	PRKAR2A	ENSG00000114302	protein kinase, cAMP-dependent, regulatory, type II, alpha [Source:HGNC Symbol;Acc:9391]	48782030	48885279	0	-	0.427589	intron	opposite
354	D2	RL	3	52309721	52310222	501	+	1.36291	1.27305	WDR82	ENSG00000164091	WD repeat domain 82 [Source:HGNC Symbol;Acc:28826]	52288437	52322036	0	-	1.31283	intron	opposite
355	D2	RL	3	52309726	52310339	613	+	1.31023	1.23676	WDR82	ENSG00000164091	WD repeat domain 82 [Source:HGNC Symbol;Acc:28826]	52288437	52322036	0	-	1.31283	intron	opposite
423	D2	RL	3	189429158	189429659	501	+	0	0	TP63	ENSG00000073282	tumor protein p63 [Source:HGNC Symbol;Acc:15979]	189349205	189615068	0	+	0.00164021	intron	same
432	D2	RL	4	350310	350923	613	+	0.330618	0.293882	ZNF141	ENSG00000131127	zinc finger protein 141 [Source:HGNC Symbol;Acc:12926]	331603	378653	0	+	0.437997	intron	same
518	D2	RL	4	147422468	147422969	501	-	0	0	SLC10A7	ENSG00000120519	solute carrier family 10 (sodium/bile acid cotransporter family), member 7 [Source:HGNC Symbol;Acc:23088]	147175127	147443123	0	-	0.0440454	intron	same
555	D2	RL	5	18270622	18271123	501	+	0	0				0	NA	34317	NA	NA	NA	NA
556	D2	RL	5	18270627	18271240	613	+	0	0				0	NA	34322	NA	NA	NA	NA
792	D2	RL	7	11352968	11353469	501	+	0	0	AC004538.3	ENSG00000230333	No description	11232993	11559802	0	+	0.00296774	utr	same
793	D2	RL	7	11352972	11353586	614	+	0	0	AC004538.3	ENSG00000230333	No description	11232993	11559802	0	+	0.00296774	utr	same
809	D2	RL	7	34272403	34273022	619	+	0	0	AC009262.2	ENSG00000236212	No description	34249138	34295955	0	+	0.000803	utr	same
810	D2	RL	7	34272405	34273103	698	+	0	0	AC009262.2	ENSG00000236212	No description	34249138	34295955	0	+	0.000803	utr	same
831	D2	RL	7	62475613	62476114	501	-	0	0				0	NA	3666	NA	NA	NA	NA
834	D2	RL	7	73150625	73151126	501	-	1.46775	1.39287	ABHD11	ENSG00000106077	abhydrolase domain containing 11 [Source:HGNC Symbol;Acc:16407]	73150424	73153197	0	-	0.951331	exon	same
851	D2	RL	7	100732842	100733342	500	+	3.51163	3.40658	TRIM56	ENSG00000169871	tripartite motif containing 56 [Source:HGNC Symbol;Acc:19028]	100728720	100735017	0	+	3.38917	exon	same
852	D2	RL	7	100732842	100733343	501	+	3.53459	3.3998	TRIM56	ENSG00000169871	tripartite motif containing 56 [Source:HGNC Symbol;Acc:19028]	100728720	100735017	0	+	3.38917	exon	same
853	D2	RL	7	100732846	100733346	500	+	3.52664	3.40658	TRIM56	ENSG00000169871	tripartite motif containing 56 [Source:HGNC Symbol;Acc:19028]	100728720	100735017	0	+	3.38917	exon	same
854	D2	RL	7	100732846	100733459	613	+	3.56333	3.55108	TRIM56	ENSG00000169871	tripartite motif containing 56 [Source:HGNC Symbol;Acc:19028]	100728720	100735017	0	+	3.38917	exon	same
855	D2	RL	7	100732847	100733460	613	+	3.56333	3.55108	TRIM56	ENSG00000169871	tripartite motif containing 56 [Source:HGNC Symbol;Acc:19028]	100728720	100735017	0	+	3.38917	exon	same
885	D2	RL	7	150195996	150196497	501	+	0.0748854	0.0449312				0	NA	15421	NA	NA	NA	NA
886	D2	RL	7	150196002	150196614	612	+	0.0613254	0.0367952				0	NA	15304	NA	NA	NA	NA
1092	D2	RL	10	58938350	58938851	501	-	0	0				0	NA	582559	NA	NA	NA	NA
1093	D2	RL	10	58938353	58938854	501	-	0	0				0	NA	582562	NA	NA	NA	NA
1176	D2	RL	11	37199217	37199718	501	+	0	0				0	NA	504394	NA	NA	NA	NA
1177	D2	RL	11	37199222	37199835	613	+	0	0				0	NA	504399	NA	NA	NA	NA
1186	D2	RL	11	60444599	60445100	501	+	0	0	LINC00301	ENSG00000181995	long intergenic non-protein coding RNA 301 [Source:HGNC Symbol;Acc:28603]	60383209	60454622	0	+	0.000316	utr	same
1276	D2	RL	11	112272716	112273217	501	+	0.0149771	0.0149771	RP11-65M17.3	ENSG00000254968	No description	112263841	112492452	0	+	0.00526201	utr	same
1355	D2	RL	12	94689338	94689839	501	+	0.539175	0.569129	PLXNC1	ENSG00000136040	plexin C1 [Source:HGNC Symbol;Acc:9106]	94542499	94701451	0	+	0.151313	intron	same
1356	D2	RL	12	94689351	94689954	603	+	0.522809	0.585048	PLXNC1	ENSG00000136040	plexin C1 [Source:HGNC Symbol;Acc:9106]	94542499	94701451	0	+	0.151313	intron	same
1376	D2	RL	12	120994836	120995337	501	+	4.52308	4.46317	RNF10	ENSG00000022840	ring finger protein 10 [Source:HGNC Symbol;Acc:10055]	120971283	121015397	0	+	1.14256	exon	same
1377	D2	RL	12	120994837	120995338	501	+	4.52308	4.46317	RNF10	ENSG00000022840	ring finger protein 10 [Source:HGNC Symbol;Acc:10055]	120971283	121015397	0	+	1.14256	exon	same
1378	D2	RL	12	120994838	120995451	613	+	5.65724	5.74295	RNF10	ENSG00000022840	ring finger protein 10 [Source:HGNC Symbol;Acc:10055]	120971283	121015397	0	+	1.14256	exon	same
1386	D2	RL	12	131832234	131832735	501	-	0	0	RP13-507P19.2	ENSG00000230294	No description	131832015	131852100	0	+	0.000374	utr	opposite
1387	D2	RL	12	133715733	133716234	501	+	2.36638	2.23158	ZNF10	ENSG00000256223	zinc finger protein 10 [Source:HGNC Symbol;Acc:12879]	133707161	133736051	0	+	0.919676	utr	same
1388	D2	RL	12	133715735	133716236	501	+	2.36638	2.24656	ZNF10	ENSG00000256223	zinc finger protein 10 [Source:HGNC Symbol;Acc:12879]	133707161	133736051	0	+	0.919676	utr	same
1389	D2	RL	12	133715739	133716351	612	+	2.20771	2.12186	ZNF10	ENSG00000256223	zinc finger protein 10 [Source:HGNC Symbol;Acc:12879]	133707161	133736051	0	+	0.919676	utr	same
1430	D2	RL	13	99861562	99862063	501	+	0.149771	0.164748	UBAC2	ENSG00000134882	UBA domain containing 2 [Source:HGNC Symbol;Acc:20486]	99853028	100038688	0	+	0.977691	intron	same
1431	D2	RL	13	99861567	99862068	501	+	0.149771	0.164748	UBAC2	ENSG00000134882	UBA domain containing 2 [Source:HGNC Symbol;Acc:20486]	99853028	100038688	0	+	0.977691	intron	same
1498	D2	RL	14	104154226	104154848	622	+	2.72742	2.60673	KLC1	ENSG00000126214	kinesin light chain 1 [Source:HGNC Symbol;Acc:6387]	104028233	104167888	0	+	0.801777	intron	same
1499	D2	RL	14	104154231	104155031	800	+	2.69389	2.47801	KLC1	ENSG00000126214	kinesin light chain 1 [Source:HGNC Symbol;Acc:6387]	104028233	104167888	0	+	0.801777	intron	same
1500	D2	RL	14	104154343	104154844	501	-	2.72583	2.92053	KLC1	ENSG00000126214	kinesin light chain 1 [Source:HGNC Symbol;Acc:6387]	104028233	104167888	0	+	0.801777	intron	opposite
1501	D2	RL	14	104154344	104154845	501	-	2.71085	2.90555	KLC1	ENSG00000126214	kinesin light chain 1 [Source:HGNC Symbol;Acc:6387]	104028233	104167888	0	+	0.801777	intron	opposite
1524	D2	RL	15	65995091	65995592	501	+	1.87213	1.81223	DENND4A	ENSG00000174485	DENN/MADD domain containing 4A [Source:HGNC Symbol;Acc:24321]	65952959	66084631	0	-	0.83377	exon	opposite
1525	D2	RL	15	65995096	65995709	613	+	1.65309	1.61635	DENND4A	ENSG00000174485	DENN/MADD domain containing 4A [Source:HGNC Symbol;Acc:24321]	65952959	66084631	0	-	0.83377	exon	opposite
1712	D2	RL	17	4226418	4226919	501	+	0.164748	0.149771	UBE2G1	ENSG00000132388	ubiquitin-conjugating enzyme E2G 1 [Source:HGNC Symbol;Acc:12482]	4172512	4269969	0	-	0.581526	intron	opposite
1713	D2	RL	17	4226423	4226924	501	+	0.164748	0.149771	UBE2G1	ENSG00000132388	ubiquitin-conjugating enzyme E2G 1 [Source:HGNC Symbol;Acc:12482]	4172512	4269969	0	-	0.581526	intron	opposite
1714	D2	RL	17	4226423	4227036	613	+	0.171431	0.146941	UBE2G1	ENSG00000132388	ubiquitin-conjugating enzyme E2G 1 [Source:HGNC Symbol;Acc:12482]	4172512	4269969	0	-	0.581526	intron	opposite
1851	D2	RL	17	80481398	80482011	613	+	0.306128	0.281637	FOXK2	ENSG00000141568	forkhead box K2 [Source:HGNC Symbol;Acc:6036]	80477589	80562483	0	+	0.415003	intron	same
1883	D2	RL	18	43301584	43302085	501	+	0.194702	0.284565				0	NA	2007	NA	NA	NA	NA
1884	D2	RL	18	43301588	43302202	614	+	0.232279	0.268954	SLC14A1	ENSG00000141469	solute carrier family 14 (urea transporter), member 1 (Kidd blood group) [Source:HGNC Symbol;Acc:10918]	43304092	43332485	1890	+	0.187208	NA	same
1945	D2	RL	19	7501348	7501849	501	+	2.33642	2.20163	ARHGEF18	ENSG00000104880	Rho/Rac guanine nucleotide exchange factor (GEF) 18 [Source:HGNC Symbol;Acc:17090]	7459999	7537370	0	+	2.01567	utr	same
1946	D2	RL	19	7501350	7501962	612	+	2.20771	2.24451	ARHGEF18	ENSG00000104880	Rho/Rac guanine nucleotide exchange factor (GEF) 18 [Source:HGNC Symbol;Acc:17090]	7459999	7537370	0	+	2.01567	utr	same
1949	D2	RL	19	8485877	8486378	501	-	0.0599083	0.0599083	2017-03-02	ENSG00000099785	membrane-associated ring finger (C3HC4) 2 [Source:HGNC Symbol;Acc:28038]	8478187	8503895	0	+	0.32286	utr	opposite
1950	D2	RL	19	8485889	8486412	523	-	0.0573931	0.0717414	2017-03-02	ENSG00000099785	membrane-associated ring finger (C3HC4) 2 [Source:HGNC Symbol;Acc:28038]	8478187	8503895	0	+	0.32286	utr	opposite
2000	D2	RL	19	36200390	36201010	620	+	0.0121071	0.0121071	AD000671.1	ENSG00000239352	No description	36195429	36205962	0	+	0.0827934	utr	same
2029	D2	RL	19	46139522	46140023	501	+	0.479267	0.494244	EML2	ENSG00000125746	echinoderm microtubule associated protein like 2 [Source:HGNC Symbol;Acc:18035]	46112660	46148726	0	-	0.295803	intron	opposite
2030	D2	RL	19	46139525	46140026	501	+	0.479267	0.509221	EML2	ENSG00000125746	echinoderm microtubule associated protein like 2 [Source:HGNC Symbol;Acc:18035]	46112660	46148726	0	-	0.295803	intron	opposite
2105	D2	RL	20	57198204	57198705	501	-	0	0				0	NA	3260	NA	NA	NA	NA
2122	D2	RL	21	26824680	26825181	501	+	0	0	AP000221.2	ENSG00000243740	No description	26825507	26839042	326	-	0.000555	NA	opposite
2123	D2	RL	21	26824684	26825185	501	+	0	0	AP000221.2	ENSG00000243740	No description	26825507	26839042	322	-	0.000555	NA	opposite
2124	D2	RL	21	26824685	26825298	613	+	0	0	AP000221.2	ENSG00000243740	No description	26825507	26839042	209	-	0.000555	NA	opposite
2153	D2	RL	22	36738416	36738917	501	+	0.658991	0.644014	MYH9	ENSG00000100345	myosin, heavy chain 9, non-muscle [Source:HGNC Symbol;Acc:7579]	36677323	36784063	0	-	1.6778	intron	opposite
2154	D2	RL	22	36738421	36739034	613	+	0.60001	0.661236	MYH9	ENSG00000100345	myosin, heavy chain 9, non-muscle [Source:HGNC Symbol;Acc:7579]	36677323	36784063	0	-	1.6778	intron	opposite
2237	D2	RL	X	152120502	152121118	616	+	0.0121856	0.0121856	ZNF185	ENSG00000147394	zinc finger protein 185 (LIM domain) [Source:HGNC Symbol;Acc:12976]	152082986	152142025	0	+	0.0410053	intron	same
2238	D2	RL	X	153339345	153339846	501	+	2.60601	2.36638	MECP2	ENSG00000169057	methyl CpG binding protein 2 (Rett syndrome) [Source:HGNC Symbol;Acc:6990]	153287024	153402578	0	-	1.27871	intron	opposite
2239	D2	RL	X	153339350	153339963	613	+	2.55923	2.31432	MECP2	ENSG00000169057	methyl CpG binding protein 2 (Rett syndrome) [Source:HGNC Symbol;Acc:6990]	153287024	153402578	0	-	1.27871	intron	opposite
2248	D2	RL	X	153739065	153739566	501	+	0.46429	0.509221	FAM3A	ENSG00000071889	family with sequence similarity 3, member A [Source:HGNC Symbol;Acc:13749]	153733350	153744566	0	-	1.05032	intron	opposite
2249	D2	RL	X	153739067	153739568	501	+	0.46429	0.509221	FAM3A	ENSG00000071889	family with sequence similarity 3, member A [Source:HGNC Symbol;Acc:13749]	153733350	153744566	0	-	1.05032	intron	opposite
6	D3	L	1	7005408	7005909	501	+	0.0149771	0.0149771	CAMTA1	ENSG00000171735	calmodulin binding transcription activator 1 [Source:HGNC Symbol;Acc:18806]	6845384	7827916	0	+	0.0364778	intron	same
16	D3	L	1	13787510	13788011	501	+	0	0				0	NA	13434	NA	NA	NA	NA
18	D3	L	1	20635750	20636251	501	-	0	0	VWA5B1	ENSG00000158816	von Willebrand factor A domain containing 5B1 [Source:HGNC Symbol;Acc:26538]	20617412	20681387	0	+	0.00881404	utr	opposite
31	D3	L	1	27915951	27916452	501	+	0.0898625	0.164748	AHDC1	ENSG00000126705	AT hook, DNA binding motif, containing 1 [Source:HGNC Symbol;Acc:25230]	27860546	27930942	0	-	0.156464	utr	opposite
34	D3	L	1	30455308	30455809	501	-	0	0				0	NA	30990	NA	NA	NA	NA
59	D3	L	1	52873841	52874462	621	+	1.7527	1.53513	PRPF38A	ENSG00000134748	PRP38 pre-mRNA processing factor 38 (yeast) domain containing A [Source:HGNC Symbol;Acc:25930]	52870236	52883992	0	+	1.33952	exon	same
80	D3	L	1	109926768	109927269	501	+	0	0	SORT1	ENSG00000134243	sortilin 1 [Source:HGNC Symbol;Acc:11186]	109852192	109940573	0	-	0.0159928	intron	opposite
88	D3	L	1	121484949	121485450	501	+	0.509221	0.479267				0	NA	162627	NA	NA	NA	NA
89	D3	L	1	121485031	121485645	614	+	0.378981	0.366756				0	NA	162709	NA	NA	NA	NA
90	D3	L	1	121485121	121485622	501	-	0.434335	0.389404				0	NA	162799	NA	NA	NA	NA
91	D3	L	1	121485184	121485685	501	-	0.404381	0.35945				0	NA	162862	NA	NA	NA	NA
129	D3	L	1	171314939	171315440	501	-	0.0449312	0.0449312				0	NA	3716	NA	NA	NA	NA
132	D3	L	1	179727941	179728442	501	-	0	0	FAM163A	ENSG00000143340	family with sequence similarity 163, member A [Source:HGNC Symbol;Acc:28274]	179712298	179785333	0	+	0.00102942	utr	opposite
133	D3	L	1	181098983	181099597	614	+	0	0				0	NA	39006	NA	NA	NA	NA
136	D3	L	1	186731303	186731804	501	+	0	0				0	NA	66281	NA	NA	NA	NA
162	D3	L	1	231058298	231058914	616	+	0	0	TTC13	ENSG00000143643	tetratricopeptide repeat domain 13 [Source:HGNC Symbol;Acc:26204]	231041989	231114621	0	-	0.346977	intron	opposite
164	D3	L	1	231526631	231527132	501	+	0.10484	0.119817	EGLN1	ENSG00000135766	egl nine homolog 1 (C. elegans) [Source:HGNC Symbol;Acc:1232]	231499497	231560790	0	-	0.264093	intron	opposite
166	D3	L	1	239775720	239776336	616	+	0	0	CHRM3	ENSG00000133019	cholinergic receptor, muscarinic 3 [Source:HGNC Symbol;Acc:1952]	239549865	240078750	0	+	0.0780727	utr	same
174	D3	L	2	1741192	1741810	618	+	0	0.0121462	PXDN	ENSG00000130508	peroxidasin homolog (Drosophila) [Source:HGNC Symbol;Acc:14966]	1635659	1748624	0	-	0.00259566	intron	opposite
278	D3	L	2	190413716	190414217	501	-	0	0				0	NA	11088	NA	NA	NA	NA
286	D3	L	2	204520448	204520949	501	-	0.0149771	0				0	NA	50249	NA	NA	NA	NA
288	D3	L	2	205303799	205304300	501	-	0	0				0	NA	30499	NA	NA	NA	NA
297	D3	L	2	216940464	216941082	618	+	0.0121462	0.0121462	PECR	ENSG00000115425	peroxisomal trans-2-enoyl-CoA reductase [Source:HGNC Symbol;Acc:18281]	216861052	216947678	0	-	0.217239	intron	opposite
308	D3	L	2	229827752	229828267	515	+	0	0	PID1	ENSG00000153823	phosphotyrosine interaction domain containing 1 [Source:HGNC Symbol;Acc:26084]	229715242	230136001	0	-	0.0203347	utr	opposite
342	D3	L	3	44925527	44926028	501	-	0	0	TGM4	ENSG00000163810	transglutaminase 4 (prostate) [Source:HGNC Symbol;Acc:11780]	44916100	44956482	0	+	0.01657	intron	opposite
392	D3	L	3	128095081	128095582	501	+	0.119817	0.149771	EEFSEC	ENSG00000132394	eukaryotic elongation factor, selenocysteine-tRNA-specific [Source:HGNC Symbol;Acc:24614]	127872297	128127485	0	+	0.153087	intron	same
400	D3	L	3	140773625	140774244	619	+	0.0121266	0	SPSB4	ENSG00000175093	splA/ryanodine receptor domain and SOCS box containing 4 [Source:HGNC Symbol;Acc:30630]	140770244	140867453	0	+	0.000464	utr	same
405	D3	L	3	143315857	143316358	501	+	0.0449312	0.0299542	SLC9A9	ENSG00000181804	solute carrier family 9 (sodium/hydrogen exchanger), member 9 [Source:HGNC Symbol;Acc:20653]	142984064	143567373	0	-	0.0714199	intron	opposite
413	D3	L	3	171753345	171753846	501	-	0	0				0	NA	3572	NA	NA	NA	NA
426	D3	L	3	195624902	195625403	501	-	1.2431	1.15324	TNK2	ENSG00000061938	tyrosine kinase, non-receptor, 2 [Source:HGNC Symbol;Acc:19297]	195590235	195638816	0	-	1.45938	utr	same
439	D3	L	4	3654068	3654569	501	+	0	0				0	NA	18366	NA	NA	NA	NA
452	D3	L	4	38833272	38833773	501	+	0	0	TLR1	ENSG00000174125	toll-like receptor 1 [Source:HGNC Symbol;Acc:11847]	38792298	38858438	0	-	0.118334	utr	opposite
466	D3	L	4	70962110	70962611	501	-	0.0149771	0				0	NA	36722	NA	NA	NA	NA
473	D3	L	4	80531690	80532191	501	-	0	0				0	NA	13363	NA	NA	NA	NA
482	D3	L	4	99905778	99906279	501	-	0	0				0	NA	10492	NA	NA	NA	NA
496	D3	L	4	112001288	112001789	501	-	0	0				0	NA	219485	NA	NA	NA	NA
497	D3	L	4	116915867	116916368	501	+	0	0	RP11-659O3.1	ENSG00000248173	No description	116843171	117218316	0	-	0.00134278	utr	opposite
509	D3	L	4	134196609	134197110	501	-	0	0				0	NA	12419	NA	NA	NA	NA
526	D3	L	4	168872772	168873273	501	-	0	0	RP11-310I9.1	ENSG00000248601	No description	168867825	169034482	0	-	0.000451	utr	same
528	D3	L	4	170507363	170507864	501	+	0.0449312	0.0748854	NEK1	ENSG00000137601	NIMA (never in mitosis gene a)-related kinase 1 [Source:HGNC Symbol;Acc:7744]	170314426	170533780	0	-	0.0839749	intron	opposite
544	D3	L	5	2204481	2205103	622	+	0	0				0	NA	19547	NA	NA	NA	NA
568	D3	L	5	41212455	41212956	501	+	0.0149771	0	C6	ENSG00000039537	complement component 6 [Source:HGNC Symbol;Acc:1339]	41142336	41261540	0	-	0.000568	utr	opposite
573	D3	L	5	50987718	50988219	501	-	0	0				0	NA	194303	NA	NA	NA	NA
586	D3	L	5	77281126	77281627	501	-	0.269587	0.239633				0	NA	14722	NA	NA	NA	NA
589	D3	L	5	80269658	80270159	501	+	0.0898625	0.0748854	RASGRF2	ENSG00000113319	Ras protein-specific guanine nucleotide-releasing factor 2 [Source:HGNC Symbol;Acc:9876]	80256491	80525975	0	+	0.398209	intron	same
604	D3	L	5	115166917	115167418	501	+	4.82262	4.32838	ATG12	ENSG00000145782	ATG12 autophagy related 12 homolog (S. cerevisiae) [Source:HGNC Symbol;Acc:588]	115163893	115177555	0	-	1.31132	utr	opposite
623	D3	L	5	137787724	137788225	501	-	0	0				0	NA	5066	NA	NA	NA	NA
629	D3	L	5	150540038	150540539	501	+	0.0299542	0.0299542				0	NA	2015	NA	NA	NA	NA
631	D3	L	5	154319877	154320437	560	+	0	0	MRPL22	ENSG00000082515	mitochondrial ribosomal protein L22 [Source:HGNC Symbol;Acc:14480]	154320630	154348971	193	+	0.480683	NA	same
650	D3	L	5	178525073	178525574	501	+	0.0149771	0.0299542				0	NA	12278	NA	NA	NA	NA
661	D3	L	6	4300775	4301276	501	-	0	0				0	NA	44701	NA	NA	NA	NA
671	D3	L	6	19831053	19831554	501	+	0	0				0	NA	6063	NA	NA	NA	NA
731	D3	L	6	100422876	100423377	501	+	0	0	MCHR2	ENSG00000152034	melanin-concentrating hormone receptor 2 [Source:HGNC Symbol;Acc:20867]	100367786	100442114	0	-	0.000202	utr	opposite
748	D3	L	6	125682803	125683304	501	-	0	0				0	NA	8053	NA	NA	NA	NA
837	D3	L	7	77795981	77796482	501	-	0	0	MAGI2	ENSG00000187391	membrane associated guanylate kinase, WW and PDZ domain containing 2 [Source:HGNC Symbol;Acc:18957]	77646393	79082890	0	-	0.000743	intron	same
844	D3	L	7	87274299	87274800	501	-	0	0	ABCB1	ENSG00000085563	ATP-binding cassette, sub-family B (MDR/TAP), member 1 [Source:HGNC Symbol;Acc:40]	87132948	87342611	0	-	0.0679542	intron	same
866	D3	L	7	116775887	116776388	501	+	0.10484	0.119817	ST7	ENSG00000004866	suppression of tumorigenicity 7 [Source:HGNC Symbol;Acc:11351]	116593292	116870157	0	+	0.023544	exon	same
873	D3	L	7	137430703	137431324	621	+	0	0	DGKI	ENSG00000157680	diacylglycerol kinase, iota [Source:HGNC Symbol;Acc:2855]	137073563	137531838	0	-	0.00611945	intron	opposite
880	D3	L	7	142667779	142668280	501	-	0	0				0	NA	8011	NA	NA	NA	NA
902	D3	L	8	3826978	3827479	501	+	0	0	CSMD1	ENSG00000183117	CUB and Sushi multiple domains 1 [Source:HGNC Symbol;Acc:14026]	2792992	4852494	0	-	0.000778	intron	opposite
905	D3	L	8	10449782	10450404	622	+	0	0				0	NA	13455	NA	NA	NA	NA
914	D3	L	8	28233794	28234295	501	+	0.389404	0.539175	ZNF395	ENSG00000186918	zinc finger protein 395 [Source:HGNC Symbol;Acc:18737]	28203102	28260218	0	-	1.01147	intron	opposite
942	D3	L	8	87738289	87738790	501	-	0	0	CNGB3	ENSG00000170289	cyclic nucleotide gated channel beta 3 [Source:HGNC Symbol;Acc:2153]	87566205	87755903	0	-	0.0723317	exon	same
943	D3	L	8	98021099	98021600	501	+	0.0149771	0.0299542	PGCP	ENSG00000104324	Plasma glutamate carboxypeptidase [Source:UniProtKB/Swiss-Prot;Acc:Q9Y646]	97657455	98161882	0	+	0.0364725	intron	same
957	D3	L	8	117198009	117198510	501	-	0	0	AF130342.1	ENSG00000249917	No description	116962736	117337297	0	-	0.000261	utr	same
973	D3	L	8	139609714	139610215	501	-	0	0	COL22A1	ENSG00000169436	collagen, type XXII, alpha 1 [Source:HGNC Symbol;Acc:22989]	139600478	139926249	0	-	0.000669	intron	same
1002	D3	L	9	74746851	74747352	501	-	0	0	GDA	ENSG00000119125	guanine deaminase [Source:HGNC Symbol;Acc:4212]	74729511	74872109	0	+	0.00115994	utr	opposite
1014	D3	L	9	93841442	93841943	501	+	0.0149771	0.0149771				0	NA	25296	NA	NA	NA	NA
1033	D3	L	9	116434433	116434934	501	+	0	0	RP11-18B16.2	ENSG00000227482	No description	116413236	116445135	0	+	0.000236	utr	same
1066	D3	L	10	6935690	6936191	501	+	0	0	RP11-799O21.2	ENSG00000234248	No description	6933419	6962434	0	-	0.00103646	utr	opposite
1074	D3	L	10	15126285	15126786	501	+	0.0149771	0.0149771	ACBD7	ENSG00000176244	acyl-CoA binding domain containing 7 [Source:HGNC Symbol;Acc:17715]	15119522	15130775	0	-	0.0200422	intron	opposite
1087	D3	L	10	52994552	52995053	501	+	0	0.0149771	PRKG1	ENSG00000185532	protein kinase, cGMP-dependent, type I [Source:HGNC Symbol;Acc:9414]	52750945	54058110	0	+	0.0158288	intron	same
1114	D3	L	10	82345127	82345747	620	+	0	0.0242142	SH2D4B	ENSG00000178217	SH2 domain containing 4B [Source:HGNC Symbol;Acc:31440]	82297658	82406316	0	+	0.0123164	intron	same
1133	D3	L	10	117858629	117859130	501	-	0	0	GFRA1	ENSG00000151892	GDNF family receptor alpha 1 [Source:HGNC Symbol;Acc:4243]	117816444	118033126	0	-	0.000347	intron	same
1138	D3	L	10	123413584	123414201	617	+	0	0				0	NA	38231	NA	NA	NA	NA
1142	D3	L	10	128776878	128777379	501	-	0	0	DOCK1	ENSG00000150760	dedicator of cytokinesis 1 [Source:HGNC Symbol;Acc:2987]	128593978	129250781	0	+	0.000973	intron	opposite
1147	D3	L	11	373260	373874	614	+	0.0244504	0.0489008	B4GALNT4	ENSG00000182272	beta-1,4-N-acetyl-galactosaminyl transferase 4 [Source:HGNC Symbol;Acc:26315]	369796	382116	0	+	0.0451561	exon	same
1160	D3	L	11	8853639	8854140	501	+	0	0	ST5	ENSG00000166444	suppression of tumorigenicity 5 [Source:HGNC Symbol;Acc:11350]	8714898	8932498	0	-	0.00849973	utr	opposite
1165	D3	L	11	19788721	19789222	501	-	0	0	NAV2	ENSG00000166833	neuron navigator 2 [Source:HGNC Symbol;Acc:15997]	19372271	20143144	0	+	0.000897	intron	opposite
1172	D3	L	11	35324196	35324697	501	-	0.0149771	0	SLC1A2	ENSG00000110436	solute carrier family 1 (glial high affinity glutamate transporter), member 2 [Source:HGNC Symbol;Acc:10940]	35272753	35441610	0	-	0.0132686	intron	same
1183	D3	L	11	49327858	49328359	501	-	0	0				0	NA	97636	NA	NA	NA	NA
1184	D3	L	11	58865959	58866572	613	+	0	0				0	NA	8086	NA	NA	NA	NA
1228	D3	L	11	67823491	67823992	501	-	0.7189	0.748854	CHKA	ENSG00000110721	choline kinase alpha [Source:HGNC Symbol;Acc:1937]	67820326	67888736	0	-	0.606218	intron	same
1234	D3	L	11	70858321	70858822	501	-	0	0	SHANK2	ENSG00000162105	SH3 and multiple ankyrin repeat domains 2 [Source:HGNC Symbol;Acc:14295]	70313961	70963623	0	-	0.000648	exon	same
1261	D3	L	11	95791603	95792104	501	-	0.35945	0.284565	MAML2	ENSG00000184384	mastermind-like 2 (Drosophila) [Source:HGNC Symbol;Acc:16259]	95709762	96076382	0	-	1.03532	intron	same
1268	D3	L	11	106258207	106258708	501	+	0.0149771	0				0	NA	255364	NA	NA	NA	NA
1269	D3	L	11	107013261	107013762	501	-	0	0				0	NA	124011	NA	NA	NA	NA
1280	D3	L	11	114688030	114688531	501	-	0	0				0	NA	108668	NA	NA	NA	NA
1292	D3	L	11	122631097	122631598	501	-	0.344473	0.389404	UBASH3B	ENSG00000154127	ubiquitin associated and SH3 domain containing B [Source:HGNC Symbol;Acc:29884]	122526383	122685181	0	+	0.45419	intron	opposite
1313	D3	L	12	41819935	41820553	618	+	0	0	PDZRN4	ENSG00000165966	PDZ domain containing ring finger 4 [Source:HGNC Symbol;Acc:30552]	41582250	41968392	0	+	0.00208337	intron	same
1340	D3	L	12	68630558	68631059	501	+	0.0299542	0.0299542				0	NA	2092	NA	NA	NA	NA
1363	D3	L	12	109924821	109925322	501	-	0.35945	0.404381	UBE3B	ENSG00000151148	ubiquitin protein ligase E3B [Source:HGNC Symbol;Acc:13478]	109915207	109974507	0	+	0.537316	intron	opposite
1414	D3	L	13	49211733	49212234	501	+	0	0				0	NA	59509	NA	NA	NA	NA
1428	D3	L	13	96520706	96521207	501	+	0	0	UGGT2	ENSG00000102595	UDP-glucose glycoprotein glucosyltransferase 2 [Source:HGNC Symbol;Acc:15664]	96453834	96705736	0	-	0.0014028	intron	opposite
1436	D3	L	13	110493665	110494166	501	+	0.0149771	0				0	NA	54750	NA	NA	NA	NA
1437	D3	L	13	110493690	110494278	588	+	0	0				0	NA	54775	NA	NA	NA	NA
1488	D3	L	14	91952897	91953398	501	-	0.179725	0.134794	SMEK1	ENSG00000100796	SMEK homolog 1, suppressor of mek1 (Dictyostelium) [Source:HGNC Symbol;Acc:20219]	91923955	91976898	0	-	1.08139	intron	same
1495	D3	L	14	96442275	96442776	501	+	0	0				0	NA	50367	NA	NA	NA	NA
1591	D3	L	16	13472793	13473294	501	-	0	0				0	NA	138521	NA	NA	NA	NA
1637	D3	L	16	46420038	46420539	501	+	0	0				0	NA	169462	NA	NA	NA	NA
1644	D3	L	16	51370316	51370817	501	+	0	0				0	NA	185135	NA	NA	NA	NA
1675	D3	L	16	87910447	87910948	501	-	0	0				0	NA	7322	NA	NA	NA	NA
1677	D3	L	16	89294256	89294757	501	+	0.988487	1.0484	ZNF778	ENSG00000170100	zinc finger protein 778 [Source:HGNC Symbol;Acc:26479]	89284111	89295363	0	+	0.252554	exon	same
1742	D3	L	17	30146007	30146508	501	-	0	0				0	NA	32375	NA	NA	NA	NA
1761	D3	L	17	40010007	40010508	501	-	3.60948	3.60948	KLHL11	ENSG00000178502	kelch-like 11 (Drosophila) [Source:HGNC Symbol;Acc:19008]	40009797	40021684	0	-	0.658374	exon	same
1864	D3	L	18	12818171	12818672	501	+	0.194702	0.179725	PTPN2	ENSG00000175354	protein tyrosine phosphatase, non-receptor type 2 [Source:HGNC Symbol;Acc:9650]	12785477	12884337	0	-	0.310365	intron	opposite
1865	D3	L	18	14127953	14128454	501	+	0.0898625	0.0599083	ZNF519	ENSG00000175322	zinc finger protein 519 [Source:HGNC Symbol;Acc:30574]	14099942	14132489	0	-	0.137443	intron	opposite
1879	D3	L	18	32334591	32335092	501	+	0	0	DTNA	ENSG00000134769	dystrobrevin, alpha [Source:HGNC Symbol;Acc:3057]	32073254	32471808	0	+	0.00049	utr	same
1970	D3	L	19	12841766	12842267	501	-	8.79155	7.99776	C19orf43	ENSG00000123144	chromosome 19 open reading frame 43 [Source:HGNC Symbol;Acc:28424]	12841455	12845529	0	-	5.25649	exon	same
1993	D3	L	19	20421666	20422167	501	+	0	0				0	NA	51160	NA	NA	NA	NA
2005	D3	L	19	39080610	39081111	501	-	0.0748854	0.0599083	MAP4K1	ENSG00000104814	mitogen-activated protein kinase kinase kinase kinase 1 [Source:HGNC Symbol;Acc:6863]	39078281	39108643	0	-	1.01772	intron	same
2017	D3	L	19	42641456	42642072	616	+	0.0609278	0.0609278	POU2F2	ENSG00000028277	POU class 2 homeobox 2 [Source:HGNC Symbol;Acc:9213]	42592650	42700737	0	-	0.313781	utr	opposite
2025	D3	L	19	46054361	46054862	501	+	1.16821	1.2431	OPA3	ENSG00000125741	optic atrophy 3 (autosomal recessive, with chorea and spastic paraplegia) [Source:HGNC Symbol;Acc:8142]	46030685	46105470	0	-	0.277774	intron	opposite
2040	D3	L	19	48852287	48852788	501	+	0.164748	0.10484	TMEM143	ENSG00000161558	transmembrane protein 143 [Source:HGNC Symbol;Acc:25603]	48835613	48867197	0	-	0.329209	intron	opposite
2078	D3	L	19	57195894	57196514	620	+	0.0121071	0.0121071				0	NA	12771	NA	NA	NA	NA
2087	D3	L	20	11025268	11025769	501	+	0	0				0	NA	10586	NA	NA	NA	NA
2103	D3	L	20	50241304	50241805	501	+	0	0.0299542	ATP9A	ENSG00000054793	ATPase, class II, type 9A [Source:HGNC Symbol;Acc:13540]	50213053	50385173	0	-	0.00314506	exon	opposite
2106	D3	L	20	57834893	57835394	501	-	0	0	ZNF831	ENSG00000124203	zinc finger protein 831 [Source:HGNC Symbol;Acc:16167]	57766075	57834168	725	+	0.559355	NA	opposite
2126	D3	L	21	34887441	34887942	501	+	0.239633	0.284565	GART	ENSG00000159131	phosphoribosylglycinamide formyltransferase, phosphoribosylglycinamide synthetase, phosphoribosylaminoimidazole synthetase [Source:HGNC Symbol;Acc:4163]	34870940	34915797	0	-	0.558297	intron	opposite
2172	D3	L	22	48938519	48939061	542	-	0	0	FAM19A5	ENSG00000219438	family with sequence similarity 19 (chemokine (C-C motif)-like), member A5 [Source:HGNC Symbol;Acc:21592]	48885272	49246724	0	+	0.000811	intron	opposite
2173	D3	L	22	48938556	48939057	501	-	0	0	FAM19A5	ENSG00000219438	family with sequence similarity 19 (chemokine (C-C motif)-like), member A5 [Source:HGNC Symbol;Acc:21592]	48885272	49246724	0	+	0.000811	intron	opposite
2174	D3	L	22	48938557	48939058	501	-	0	0	FAM19A5	ENSG00000219438	family with sequence similarity 19 (chemokine (C-C motif)-like), member A5 [Source:HGNC Symbol;Acc:21592]	48885272	49246724	0	+	0.000811	intron	opposite
2175	D3	L	22	48938560	48939061	501	-	0	0	FAM19A5	ENSG00000219438	family with sequence similarity 19 (chemokine (C-C motif)-like), member A5 [Source:HGNC Symbol;Acc:21592]	48885272	49246724	0	+	0.000811	intron	opposite
2176	D3	L	22	50626399	50626900	501	+	0.808762	0.898625	TRABD	ENSG00000170638	TraB domain containing [Source:HGNC Symbol;Acc:28805]	50624344	50638027	0	+	3.86254	utr	same
2177	D3	L	22	50626411	50627019	608	+	0.777775	0.851849	TRABD	ENSG00000170638	TraB domain containing [Source:HGNC Symbol;Acc:28805]	50624344	50638027	0	+	3.86254	utr	same
2191	D3	L	X	19830773	19831274	501	-	0.0149771	0.0149771	SH3KBP1	ENSG00000147010	SH3-domain kinase binding protein 1 [Source:HGNC Symbol;Acc:13867]	19552083	19905719	0	-	0.270986	intron	same
2211	D3	L	X	58247057	58247558	501	-	0	0				0	NA	309990	NA	NA	NA	NA
1	D3	P	1	764811	765312	501	+	0.119817	0.10484	RP11-206L10.11	ENSG00000228794	No description	762988	789791	0	+	0.260864	utr	same
14	D3	P	1	12482866	12483367	501	-	0.0898625	0.0748854	VPS13D	ENSG00000048707	vacuolar protein sorting 13 homolog D (S. cerevisiae) [Source:HGNC Symbol;Acc:23595]	12290124	12572099	0	+	0.37921	intron	opposite
19	D3	P	1	21232388	21232889	501	-	0	0.0149771	EIF4G3	ENSG00000075151	eukaryotic translation initiation factor 4 gamma, 3 [Source:HGNC Symbol;Acc:3298]	21132972	21503377	0	-	0.0664556	intron	same
30	D3	P	1	27778616	27779117	501	+	0.134794	0.149771	WASF2	ENSG00000158195	WAS protein family, member 2 [Source:HGNC Symbol;Acc:12733]	27730730	27816669	0	-	0.671625	utr	opposite
33	D3	P	1	29265459	29265960	501	+	0.374427	0.419358	EPB41	ENSG00000159023	erythrocyte membrane protein band 4.1 (elliptocytosis 1, RH-linked) [Source:HGNC Symbol;Acc:3377]	29213603	29446553	0	+	0.801033	intron	same
56	D3	P	1	45973366	45973867	501	+	0.0449312	0.0299542	MMACHC	ENSG00000132763	methylmalonic aciduria (cobalamin deficiency) cblC type, with homocystinuria [Source:HGNC Symbol;Acc:24525]	45965725	45976739	0	+	0.0580183	intron	same
66	D3	P	1	79228393	79228894	501	-	0	0				0	NA	75548	NA	NA	NA	NA
68	D3	P	1	88521773	88522274	501	+	0	0				0	NA	150376	NA	NA	NA	NA
85	D3	P	1	114441932	114442433	501	-	1.07835	1.13826	RP5-1073O3.5	ENSG00000226167	No description	114399257	114443859	0	+	0.396127	intron	opposite
95	D3	P	1	150299213	150299714	501	-	0.554152	0.524198	PRPF3	ENSG00000117360	PRP3 pre-mRNA processing factor 3 homolog (S. cerevisiae) [Source:HGNC Symbol;Acc:17348]	150293925	150325671	0	+	1.23362	intron	opposite
99	D3	P	1	151023974	151024475	501	+	14.4529	13.045	C1orf56	ENSG00000143443	chromosome 1 open reading frame 56 [Source:HGNC Symbol;Acc:26045]	151020216	151024462	0	+	2.72804	utr	same
109	D3	P	1	154387760	154388261	501	+	0.0299542	0.0449312	IL6R	ENSG00000160712	interleukin 6 receptor [Source:HGNC Symbol;Acc:6019]	154377669	154441926	0	+	0.556124	intron	same
121	D3	P	1	155747801	155748417	616	+	0.231526	0.207155	GON4L	ENSG00000116580	gon-4-like (C. elegans) [Source:HGNC Symbol;Acc:25973]	155719508	155829191	0	-	0.435889	intron	opposite
131	D3	P	1	176170535	176171153	618	+	0.0728772	0.0728772	RFWD2	ENSG00000143207	ring finger and WD repeat domain 2 [Source:HGNC Symbol;Acc:17440]	175911248	176176629	0	-	0.237526	intron	opposite
141	D3	P	1	198237732	198238233	501	+	0.509221	0.494244	NEK7	ENSG00000151414	NIMA (never in mitosis gene a)-related kinase 7 [Source:HGNC Symbol;Acc:13386]	198126093	198291550	0	+	0.16245	intron	same
153	D3	P	1	216495207	216495708	501	+	0	0	USH2A	ENSG00000042781	Usher syndrome 2A (autosomal recessive, mild) [Source:HGNC Symbol;Acc:12601]	215796236	216596738	0	-	0.000291	exon	opposite
158	D3	P	1	226896708	226897209	501	-	6.70973	7.33877	ITPKB	ENSG00000143772	inositol-trisphosphate 3-kinase B [Source:HGNC Symbol;Acc:6179]	226819391	226927024	0	-	3.09928	intron	same
160	D3	P	1	228442576	228443077	501	+	0.0599083	0.0449312	OBSCN	ENSG00000154358	obscurin, cytoskeletal calmodulin and titin-interacting RhoGEF [Source:HGNC Symbol;Acc:15719]	228395831	228566575	0	+	0.990004	intron	same
165	D3	P	1	231671621	231672122	501	+	0.629037	0.658991	TSNAX	ENSG00000116918	translin-associated factor X [Source:HGNC Symbol;Acc:12380]	231664287	231702270	0	+	0.416463	intron	same
172	D3	P	1	247986506	247987007	501	+	0	0				0	NA	7475	NA	NA	NA	NA
187	D3	P	2	24875659	24876160	501	+	0.0748854	0.0748854	NCOA1	ENSG00000084676	nuclear receptor coactivator 1 [Source:HGNC Symbol;Acc:7668]	24714783	24993571	0	+	0.287564	utr	same
188	D3	P	2	24875663	24876164	501	+	0.0748854	0.0748854	NCOA1	ENSG00000084676	nuclear receptor coactivator 1 [Source:HGNC Symbol;Acc:7668]	24714783	24993571	0	+	0.287564	utr	same
189	D3	P	2	24875664	24876277	613	+	0.0612255	0.0612255	NCOA1	ENSG00000084676	nuclear receptor coactivator 1 [Source:HGNC Symbol;Acc:7668]	24714783	24993571	0	+	0.287564	utr	same
194	D3	P	2	25986249	25986750	501	+	0.0299542	0.0149771	ASXL2	ENSG00000143970	additional sex combs like 2 (Drosophila) [Source:HGNC Symbol;Acc:23805]	25960557	26101385	0	-	0.197106	intron	opposite
195	D3	P	2	25989367	25989868	501	+	0.0149771	0.0149771	ASXL2	ENSG00000143970	additional sex combs like 2 (Drosophila) [Source:HGNC Symbol;Acc:23805]	25960557	26101385	0	-	0.197106	intron	opposite
205	D3	P	2	28209670	28210171	501	-	0	0	MRPL33	ENSG00000243147	mitochondrial ribosomal protein L33 [Source:HGNC Symbol;Acc:14487]	27994584	28210954	0	+	0.0699828	intron	opposite
208	D3	P	2	38815340	38815841	501	-	0.0299542	0.0149771	HNRPLL	ENSG00000143889	heterogeneous nuclear ribonucleoprotein L-like [Source:HGNC Symbol;Acc:25127]	38789120	38830728	0	-	0.117993	intron	same
212	D3	P	2	48677671	48678293	622	+	0.555138	0.422387	PPP1R21	ENSG00000162869	protein phosphatase 1, regulatory subunit 21 [Source:HGNC Symbol;Acc:30595]	48667737	48742525	0	+	0.401112	exon	same
220	D3	P	2	70451571	70452072	501	+	1.81223	1.94702	C2orf42	ENSG00000115998	chromosome 2 open reading frame 42 [Source:HGNC Symbol;Acc:26056]	70377012	70475747	0	-	0.53387	exon	opposite
232	D3	P	2	95843610	95844111	501	-	0.0149771	0.0149771	ZNF2	ENSG00000163067	zinc finger protein 2 [Source:HGNC Symbol;Acc:12991]	95831177	95850065	0	+	0.0195037	intron	opposite
237	D3	P	2	112998381	112998882	501	+	0.733877	0.61406	ZC3H8	ENSG00000144161	zinc finger CCCH-type containing 8 [Source:HGNC Symbol;Acc:30941]	112973254	113012713	0	-	0.756422	intron	opposite
243	D3	P	2	117533877	117534378	501	+	0	0				0	NA	244392	NA	NA	NA	NA
253	D3	P	2	144126097	144126598	501	+	1.25807	1.48273	ARHGAP15	ENSG00000075884	Rho GTPase activating protein 15 [Source:HGNC Symbol;Acc:21030]	143848931	144525921	0	+	0.588805	intron	same
254	D3	P	2	148221116	148221617	501	-	0	0				0	NA	8084	NA	NA	NA	NA
256	D3	P	2	150341846	150342347	501	+	0	0				0	NA	11184	NA	NA	NA	NA
269	D3	P	2	181580807	181581308	501	+	0	0				0	NA	23626	NA	NA	NA	NA
271	D3	P	2	181868447	181868948	501	-	0.0449312	0.0449312	UBE2E3	ENSG00000170035	ubiquitin-conjugating enzyme E2E 3 [Source:HGNC Symbol;Acc:12479]	181831975	181941312	0	+	0.182499	intron	opposite
283	D3	P	2	196935430	196936050	620	+	0	0	DNAH7	ENSG00000118997	dynein, axonemal, heavy chain 7 [Source:HGNC Symbol;Acc:18661]	196602427	196935730	0	-	0.0246779	exon	opposite
290	D3	P	2	206989924	206990425	501	+	0.494244	0.374427	NDUFS1	ENSG00000023228	NADH dehydrogenase (ubiquinone) Fe-S protein 1, 75kDa (NADH-coenzyme Q reductase) [Source:HGNC Symbol;Acc:7707]	206986149	207024327	0	-	0.572862	intron	opposite
310	D3	P	2	231932270	231932892	622	+	0.0482728	0.0362046	PSMD1	ENSG00000173692	proteasome (prosome, macropain) 26S subunit, non-ATPase, 1 [Source:HGNC Symbol;Acc:9554]	231921578	232037541	0	+	0.189188	intron	same
323	D3	P	3	17238891	17239392	501	+	0.0149771	0.0299542	TBC1D5	ENSG00000131374	TBC1 domain family, member 5 [Source:HGNC Symbol;Acc:19166]	17199899	18486309	0	-	0.20408	intron	opposite
338	D3	P	3	28384648	28385149	501	+	0.0599083	0.0748854	AZI2	ENSG00000163512	5-azacytidine induced 2 [Source:HGNC Symbol;Acc:24002]	28356494	28390618	0	-	0.545518	utr	opposite
343	D3	P	3	46033367	46033868	501	+	0.0748854	0.0898625	FYCO1	ENSG00000163820	FYVE and coiled-coil domain containing 1 [Source:HGNC Symbol;Acc:14673]	45959396	46037316	0	-	0.360385	utr	opposite
344	D3	P	3	46033381	46033985	604	+	0.0745636	0.0745636	FYCO1	ENSG00000163820	FYVE and coiled-coil domain containing 1 [Source:HGNC Symbol;Acc:14673]	45959396	46037316	0	-	0.360385	utr	opposite
356	D3	P	3	53267042	53267543	501	+	2.60601	2.44126	TKT	ENSG00000163931	transketolase [Source:HGNC Symbol;Acc:11834]	53258723	53290068	0	-	0.706373	exon	opposite
357	D3	P	3	53267044	53267545	501	+	2.60601	2.44126	TKT	ENSG00000163931	transketolase [Source:HGNC Symbol;Acc:11834]	53258723	53290068	0	-	0.706373	exon	opposite
358	D3	P	3	53267046	53267547	501	+	2.60601	2.42629	TKT	ENSG00000163931	transketolase [Source:HGNC Symbol;Acc:11834]	53258723	53290068	0	-	0.706373	exon	opposite
359	D3	P	3	53267047	53267548	501	+	2.60601	2.42629	TKT	ENSG00000163931	transketolase [Source:HGNC Symbol;Acc:11834]	53258723	53290068	0	-	0.706373	exon	opposite
360	D3	P	3	53267048	53267660	612	+	2.20771	2.13412	TKT	ENSG00000163931	transketolase [Source:HGNC Symbol;Acc:11834]	53258723	53290068	0	-	0.706373	exon	opposite
363	D3	P	3	59620309	59620810	501	-	0	0				0	NA	114226	NA	NA	NA	NA
366	D3	P	3	71428212	71428713	501	+	0.658991	0.763831	FOXP1	ENSG00000114861	forkhead box P1 [Source:HGNC Symbol;Acc:3823]	71003844	71633140	0	-	0.832893	utr	opposite
376	D3	P	3	105452632	105453133	501	+	1.91707	1.84218	CBLB	ENSG00000114423	Cas-Br-M (murine) ecotropic retroviral transforming sequence b [Source:HGNC Symbol;Acc:1542]	105374305	105588396	0	-	0.571687	exon	opposite
381	D3	P	3	112669989	112670490	501	+	0	0	CD200R1	ENSG00000163606	CD200 receptor 1 [Source:HGNC Symbol;Acc:24235]	112640056	112693969	0	-	0.0274723	intron	opposite
394	D3	P	3	130700925	130701426	501	+	0.149771	0.10484	ATP2C1	ENSG00000017260	ATPase, Ca++ transporting, type 2C, member 1 [Source:HGNC Symbol;Acc:13211]	130569439	130735556	0	+	0.258163	intron	same
402	D3	P	3	142735631	142736249	618	+	2.12558	2.27134	U2SURP	ENSG00000163714	U2 snRNP-associated SURP domain containing [Source:HGNC Symbol;Acc:30855]	142720010	142779567	0	+	1.07668	exon	same
427	D3	P	3	195784925	195785426	501	-	0.97351	0.868671	TFRC	ENSG00000072274	transferrin receptor (p90, CD71) [Source:HGNC Symbol;Acc:11763]	195754054	195809060	0	-	0.525954	exon	same
428	D3	P	3	196815254	196815755	501	-	0.299542	0.25461	DLG1	ENSG00000075711	discs, large homolog 1 (Drosophila) [Source:HGNC Symbol;Acc:2900]	196769431	197026171	0	-	0.225577	intron	same
438	D3	P	4	2920753	2921254	501	+	0.389404	0.419358	ADD1	ENSG00000087274	adducin 1 (alpha) [Source:HGNC Symbol;Acc:243]	2845584	2931803	0	+	1.01101	intron	same
478	D3	P	4	87897762	87898263	501	-	0.389404	0.344473	AFF1	ENSG00000172493	AF4/FMR2 family, member 1 [Source:HGNC Symbol;Acc:7135]	87856154	88062206	0	+	0.303873	intron	opposite
484	D3	P	4	100727987	100728488	501	+	0	0				0	NA	9502	NA	NA	NA	NA
486	D3	P	4	103728783	103729284	501	-	1.66246	1.69241	UBE2D3	ENSG00000109332	ubiquitin-conjugating enzyme E2D 3 [Source:HGNC Symbol;Acc:12476]	103715540	103790053	0	-	1.09941	intron	same
491	D3	P	4	109390363	109390864	501	-	0	0				0	NA	68482	NA	NA	NA	NA
494	D3	P	4	110373211	110373829	618	+	0.0971695	0.121462	SEC24B	ENSG00000138802	SEC24 family, member B (S. cerevisiae) [Source:HGNC Symbol;Acc:10704]	110354928	110461612	0	+	0.669994	intron	same
508	D3	P	4	133650012	133650513	501	+	0	0				0	NA	50354	NA	NA	NA	NA
514	D3	P	4	143143715	143144337	622	+	0.0844775	0.108614	INPP4B	ENSG00000109452	inositol polyphosphate-4-phosphatase, type II, 105kDa [Source:HGNC Symbol;Acc:6075]	142944313	143768585	0	-	0.107331	intron	opposite
520	D3	P	4	151829121	151829622	501	+	0.97351	0.883648	LRBA	ENSG00000198589	LPS-responsive vesicle trafficking, beach and anchor containing [Source:HGNC Symbol;Acc:1742]	151185594	151936879	0	-	0.131399	exon	opposite
532	D3	P	4	174816123	174816624	501	-	0	0	RP11-161D15.2	ENSG00000250043	No description	174798622	174834403	0	-	0.00021	utr	same
535	D3	P	4	178395339	178395840	501	+	0.0149771	0.0149771	RP11-130F10.1	ENSG00000250131	No description	178366133	178598280	0	+	0.0496487	utr	same
551	D3	P	5	7897099	7897600	501	-	2.14172	2.4862	MTRR	ENSG00000124275	5-methyltetrahydrofolate-homocysteine methyltransferase reductase [Source:HGNC Symbol;Acc:7473]	7851299	7906138	0	+	0.44749	exon	opposite
558	D3	P	5	26196164	26196665	501	-	0	0				0	NA	183030	NA	NA	NA	NA
561	D3	P	5	35424554	35425055	501	-	0	0				0	NA	4111	NA	NA	NA	NA
563	D3	P	5	38982293	38982794	501	-	1.06337	0.913602	RICTOR	ENSG00000164327	RPTOR independent companion of MTOR, complex 2 [Source:HGNC Symbol;Acc:28611]	38938021	39074510	0	-	1.07189	intron	same
574	D3	P	5	52177010	52177511	501	-	0	0	ITGA1	ENSG00000213949	integrin, alpha 1 [Source:HGNC Symbol;Acc:6134]	52083730	52252327	0	+	0.0238133	intron	opposite
580	D3	P	5	74150140	74150641	501	+	0.149771	0.0898625	FAM169A	ENSG00000198780	family with sequence similarity 169, member A [Source:HGNC Symbol;Acc:29138]	74073399	74162776	0	-	0.378625	utr	opposite
588	D3	P	5	79504555	79505056	501	+	0.673969	0.673969	SERINC5	ENSG00000164300	serine incorporator 5 [Source:HGNC Symbol;Acc:18825]	79407050	79551898	0	-	2.14075	intron	opposite
601	D3	P	5	112232249	112232750	501	+	0.35945	0.35945	REEP5	ENSG00000129625	receptor accessory protein 5 [Source:HGNC Symbol;Acc:30077]	112212084	112258236	0	-	0.362461	intron	opposite
608	D3	P	5	124333940	124334441	501	+	0	0				0	NA	38083	NA	NA	NA	NA
624	D3	P	5	138186062	138186563	501	-	0.0149771	0.0149771	CTNNA1	ENSG00000044115	catenin (cadherin-associated protein), alpha 1, 102kDa [Source:HGNC Symbol;Acc:2509]	137946656	138270723	0	+	0.0170523	intron	opposite
625	D3	P	5	138647301	138647923	622	+	1.72575	1.47232	MATR3	ENSG00000015479	matrin 3 [Source:HGNC Symbol;Acc:6912]	138609441	138667360	0	+	1.35338	intron	same
645	D3	P	5	176651751	176652252	501	+	0.0299542	0.0599083	NSD1	ENSG00000165671	nuclear receptor binding SET domain protein 1 [Source:HGNC Symbol;Acc:14234]	176560026	176727216	0	+	0.48702	intron	same
654	D3	P	5	179236881	179237496	615	+	0.439393	0.34175	SQSTM1	ENSG00000161011	sequestosome 1 [Source:HGNC Symbol;Acc:11280]	179233388	179265078	0	+	1.68087	utr	same
669	D3	P	6	17661694	17662195	501	-	1.49771	1.57259	NUP153	ENSG00000124789	nucleoporin 153kDa [Source:HGNC Symbol;Acc:8062]	17615269	17706818	0	-	0.64287	exon	same
670	D3	P	6	18439452	18439953	501	+	0.0149771	0.0299542	RNF144B	ENSG00000137393	ring finger protein 144B [Source:HGNC Symbol;Acc:21578]	18368779	18469105	0	+	0.026229	exon	same
673	D3	P	6	28119934	28120556	622	+	1.99125	1.94298	ZNF192	ENSG00000198315	zinc finger protein 192 [Source:HGNC Symbol;Acc:12983]	28109716	28124089	0	+	2.15031	exon	same
692	D3	P	6	33038723	33039224	501	+	0.0898625	0.0599083	HLA-DPA1	ENSG00000231389	major histocompatibility complex, class II, DP alpha 1 [Source:HGNC Symbol;Acc:4938]	33032346	33048552	0	-	0.927344	intron	opposite
693	D3	P	6	33229038	33229654	616	+	0.377753	0.353381	VPS52	ENSG00000223501	vacuolar protein sorting 52 homolog (S. cerevisiae) [Source:HGNC Symbol;Acc:10518]	33218049	33239824	0	-	1.14697	intron	opposite
695	D3	P	6	34575165	34575787	622	+	0.0362046	0.0603411	C6orf106	ENSG00000196821	chromosome 6 open reading frame 106 [Source:HGNC Symbol;Acc:21215]	34555065	34664636	0	-	0.236591	intron	opposite
702	D3	P	6	37291790	37292412	622	+	0.20516	0.20516	TBC1D22B	ENSG00000065491	TBC1 domain family, member 22B [Source:HGNC Symbol;Acc:21602]	37225548	37300746	0	+	0.178467	intron	same
713	D3	P	6	45303252	45303753	501	+	0	0	SUPT3H	ENSG00000196284	suppressor of Ty 3 homolog (S. cerevisiae) [Source:HGNC Symbol;Acc:11466]	44777054	45345690	0	-	0.0672337	intron	opposite
715	D3	P	6	46927248	46927749	501	+	0.0299542	0				0	NA	4568	NA	NA	NA	NA
718	D3	P	6	64409753	64410254	501	+	1.00346	0.658991	PHF3	ENSG00000118482	PHD finger protein 3 [Source:HGNC Symbol;Acc:8921]	64345725	64489229	0	+	0.660766	exon	same
754	D3	P	6	138142489	138142990	501	-	0.943556	0.97351	RP11-356I2.2	ENSG00000235842	No description	138144810	138147031	1820	-	1.64784	NA	same
761	D3	P	6	147651788	147652289	501	+	0.10484	0.10484	STXBP5	ENSG00000164506	syntaxin binding protein 5 (tomosyn) [Source:HGNC Symbol;Acc:19665]	147525508	147708707	0	+	0.228674	intron	same
777	D3	P	6	166742233	166742734	501	-	0.793785	0.7189	SFT2D1	ENSG00000198818	SFT2 domain containing 1 [Source:HGNC Symbol;Acc:21102]	166733216	166756079	0	-	0.581052	intron	same
781	D3	P	7	3149130	3149752	622	+	0	0				0	NA	23075	NA	NA	NA	NA
802	D3	P	7	26235001	26235502	501	-	11.098	11.6372	HNRNPA2B1	ENSG00000122566	heterogeneous nuclear ribonucleoprotein A2/B1 [Source:HGNC Symbol;Acc:5033]	26229547	26241149	0	-	8.29412	exon	same
838	D3	P	7	79062296	79062797	501	-	0.0149771	0	MAGI2	ENSG00000187391	membrane associated guanylate kinase, WW and PDZ domain containing 2 [Source:HGNC Symbol;Acc:18957]	77646393	79082890	0	-	0.000743	intron	same
846	D3	P	7	99167643	99168144	501	-	3.14519	3.14519	ZNF655	ENSG00000197343	zinc finger protein 655 [Source:HGNC Symbol;Acc:30899]	99156029	99205433	0	+	1.45363	intron	opposite
847	D3	P	7	99306781	99307397	616	+	0.0731134	0.0731134	CYP3A7	ENSG00000160870	cytochrome P450, family 3, subfamily A, polypeptide 7 [Source:HGNC Symbol;Acc:2640]	99293368	99332819	0	-	0.0916657	exon	opposite
857	D3	P	7	102953181	102953682	501	-	2.8756	2.83067	PMPCB	ENSG00000105819	peptidase (mitochondrial processing) beta [Source:HGNC Symbol;Acc:9119]	102937869	102969958	0	+	1.52783	exon	opposite
867	D3	P	7	120741934	120742435	501	+	0	0	C7orf58	ENSG00000106034	chromosome 7 open reading frame 58 [Source:HGNC Symbol;Acc:26159]	120628731	120937498	0	+	0.000609	intron	same
877	D3	P	7	138945197	138945698	501	+	0	0	UBN2	ENSG00000157741	ubinuclein 2 [Source:HGNC Symbol;Acc:21931]	138915102	138992981	0	+	0.194913	intron	same
883	D3	P	7	148577690	148578191	501	+	0.0748854	0.10484	EZH2	ENSG00000106462	enhancer of zeste homolog 2 (Drosophila) [Source:HGNC Symbol;Acc:3527]	148504475	148581413	0	-	0.152834	utr	opposite
897	D3	P	7	158575599	158576100	501	-	4.10372	3.71432	ESYT2	ENSG00000117868	extended synaptotagmin-like protein 2 [Source:HGNC Symbol;Acc:22211]	158523686	158622944	0	-	1.91865	intron	same
899	D3	P	8	950897	951519	622	+	0	0	CTD-3212A4.1	ENSG00000237647	No description	687651	1087777	0	+	0.000395	utr	same
912	D3	P	8	24790890	24791391	501	-	0	0				0	NA	14283	NA	NA	NA	NA
918	D3	P	8	36736752	36737370	618	+	0	0	KCNU1	ENSG00000215262	potassium channel, subfamily U, member 1 [Source:HGNC Symbol;Acc:18867]	36641842	36793646	0	+	0.00173346	intron	same
924	D3	P	8	52774513	52775014	501	+	0.404381	0.434335	PCMTD1	ENSG00000168300	protein-L-isoaspartate (D-aspartate) O-methyltransferase domain containing 1 [Source:HGNC Symbol;Acc:30483]	52730140	52811735	0	-	0.94124	intron	opposite
928	D3	P	8	59814561	59815176	615	+	0.0122053	0.0122054	TOX	ENSG00000198846	thymocyte selection-associated high mobility group box [Source:HGNC Symbol;Acc:18988]	59717977	60031767	0	-	0.0273625	intron	opposite
931	D3	P	8	71052198	71052812	614	+	0.33008	0.268954	NCOA2	ENSG00000140396	nuclear receptor coactivator 2 [Source:HGNC Symbol;Acc:7669]	71021997	71316040	0	-	0.300618	intron	opposite
934	D3	P	8	79983249	79983750	501	-	0	0				0	NA	226202	NA	NA	NA	NA
940	D3	P	8	85713344	85713845	501	-	0	0	RALYL	ENSG00000184672	RALY RNA binding protein-like [Source:HGNC Symbol;Acc:27036]	85095022	85834079	0	+	0.000336	intron	opposite
949	D3	P	8	101332431	101332932	501	+	0	0	RNF19A	ENSG00000034677	ring finger protein 19A [Source:HGNC Symbol;Acc:13432]	101269288	101348446	0	-	0.624396	utr	opposite
952	D3	P	8	103354729	103355230	501	+	1.85716	1.60255	UBR5	ENSG00000104517	ubiquitin protein ligase E3 component n-recognin 5 [Source:HGNC Symbol;Acc:16806]	103264501	103425069	0	-	0.611241	intron	opposite
978	D3	P	8	145994241	145994742	501	+	0.0599083	0.0898625				0	NA	2869	NA	NA	NA	NA
980	D3	P	8	146014866	146015483	617	+	8.11462	3.26045	RPL8	ENSG00000161016	ribosomal protein L8 [Source:HGNC Symbol;Acc:10368]	146015150	146017972	0	-	7.61171	exon	opposite
1000	D3	P	9	36044754	36045255	501	+	0.0599083	0.0599083	RECK	ENSG00000122707	reversion-inducing-cysteine-rich protein with kazal motifs [Source:HGNC Symbol;Acc:11345]	36036430	36124448	0	+	0.182113	intron	same
1001	D3	P	9	72219655	72220156	501	+	0	0.0149771	APBA1	ENSG00000107282	amyloid beta (A4) precursor protein-binding, family A, member 1 [Source:HGNC Symbol;Acc:578]	72045204	72287222	0	-	0.00636847	utr	opposite
1012	D3	P	9	92132213	92132714	501	-	0	0				0	NA	19168	NA	NA	NA	NA
1015	D3	P	9	93873851	93874467	616	+	0.0731134	0.0609278				0	NA	4265	NA	NA	NA	NA
1016	D3	P	9	95742180	95742802	622	+	0.591342	0.748229	FGD3	ENSG00000127084	FYVE, RhoGEF and PH domain containing 3 [Source:HGNC Symbol;Acc:16027]	95709733	95798518	0	+	1.27978	intron	same
1026	D3	P	9	104333017	104333639	622	+	0.265501	0.33791	GRIN3A	ENSG00000198785	glutamate receptor, ionotropic, N-methyl-D-aspartate 3A [Source:HGNC Symbol;Acc:16767]	104331635	104500862	0	-	0.0269235	utr	opposite
1030	D3	P	9	108067986	108068608	622	+	0	0	SLC44A1	ENSG00000070214	solute carrier family 44, member 1 [Source:HGNC Symbol;Acc:18798]	108006903	108201452	0	+	0.0524807	intron	same
1032	D3	P	9	115078243	115078744	501	-	0.374427	0.35945	ROD1	ENSG00000119314	ROD1 regulator of differentiation 1 (S. pombe) [Source:HGNC Symbol;Acc:10253]	114980715	115095947	0	-	0.532799	intron	same
1038	D3	P	9	128604307	128604808	501	+	0.25461	0.25461	PBX3	ENSG00000167081	pre-B-cell leukemia homeobox 3 [Source:HGNC Symbol;Acc:8634]	128509624	128729656	0	+	0.195998	intron	same
1044	D3	P	9	132681698	132682199	501	+	1.8272	1.60255	FNBP1	ENSG00000187239	formin binding protein 1 [Source:HGNC Symbol;Acc:17069]	132649466	132805473	0	-	1.0894	intron	opposite
1048	D3	P	9	139356787	139357409	622	+	1.53266	1.62921	SEC16A	ENSG00000148396	SEC16 homolog A (S. cerevisiae) [Source:HGNC Symbol;Acc:29006]	139334549	139372141	0	-	1.85877	exon	opposite
1062	D3	P	10	6407954	6408455	501	-	0.224656	0.149771				0	NA	13231	NA	NA	NA	NA
1075	D3	P	10	17278454	17278955	501	+	2.62099	2.65094	VIM	ENSG00000026025	vimentin [Source:HGNC Symbol;Acc:12692]	17270258	17279592	0	+	4.57714	intron	same
1077	D3	P	10	17742448	17742949	501	-	0.299542	0.314519	STAM	ENSG00000136738	signal transducing adaptor molecule (SH3 domain and ITAM motif) 1 [Source:HGNC Symbol;Acc:11357]	17686124	17757913	0	+	0.260775	intron	opposite
1080	D3	P	10	42390931	42391432	501	-	0	0				0	NA	512184	NA	NA	NA	NA
1085	D3	P	10	49524395	49525017	622	+	0.712024	0.663752	MAPK8	ENSG00000107643	mitogen-activated protein kinase 8 [Source:HGNC Symbol;Acc:6881]	49514698	49647403	0	+	0.71125	utr	same
1098	D3	P	10	63726621	63727122	501	-	0.0449312	0.0599083	ARID5B	ENSG00000150347	AT rich interactive domain 5B (MRF1-like) [Source:HGNC Symbol;Acc:17362]	63661059	63856703	0	+	0.219931	intron	opposite
1125	D3	P	10	103146401	103146902	501	+	0.119817	0.164748	BTRC	ENSG00000166167	beta-transducin repeat containing [Source:HGNC Symbol;Acc:1144]	103113820	103317078	0	+	0.148181	intron	same
1127	D3	P	10	104054330	104054952	622	+	0.277569	0.277569	GBF1	ENSG00000107862	golgi brefeldin A resistant guanine nucleotide exchange factor 1 [Source:HGNC Symbol;Acc:4181]	104005289	104142656	0	+	0.393417	intron	same
1148	D3	P	11	533317	533818	501	-	1.52766	1.66246	HRAS	ENSG00000174775	v-Ha-ras Harvey rat sarcoma viral oncogene homolog [Source:HGNC Symbol;Acc:5173]	532242	537287	0	-	0.674966	exon	same
1149	D3	P	11	749843	750344	501	+	0.194702	0.209679	TALDO1	ENSG00000177156	transaldolase 1 [Source:HGNC Symbol;Acc:11559]	747329	765024	0	+	0.472455	intron	same
1161	D3	P	11	13284772	13285273	501	-	0	0.0149771	AC022878.1	ENSG00000244182	No description	13285471	13285660	198	+	0	NA	opposite
1164	D3	P	11	16868446	16868947	501	+	0	0.0149771	PLEKHA7	ENSG00000166689	pleckstrin homology domain containing, family A member 7 [Source:HGNC Symbol;Acc:27049]	16799842	17035990	0	-	0.0269667	intron	opposite
1181	D3	P	11	46104082	46104583	501	+	0.0299542	0.0299542	PHF21A	ENSG00000135365	PHD finger protein 21A [Source:HGNC Symbol;Acc:24156]	45950871	46142985	0	-	0.222289	intron	opposite
1188	D3	P	11	62533316	62533817	501	+	0.344473	0.434335	POLR2G	ENSG00000168002	polymerase (RNA) II (DNA directed) polypeptide G [Source:HGNC Symbol;Acc:9194]	62529016	62534182	0	+	1.81887	exon	same
1191	D3	P	11	63472984	63473485	501	-	0.0449312	0.0299542	RTN3	ENSG00000133318	reticulon 3 [Source:HGNC Symbol;Acc:10469]	63448918	63527363	0	+	0.104756	intron	opposite
1195	D3	P	11	65261552	65262053	501	-	0	0				0	NA	3180	NA	NA	NA	NA
1197	D3	P	11	65297519	65298020	501	-	0.703923	0.584106	SCYL1	ENSG00000142186	SCY1-like 1 (S. cerevisiae) [Source:HGNC Symbol;Acc:14372]	65292548	65306175	0	+	1.21593	intron	opposite
1201	D3	P	11	65830578	65831079	501	-	4.53805	4.49312	SF3B2	ENSG00000087365	splicing factor 3b, subunit 2, 145kDa [Source:HGNC Symbol;Acc:10769]	65818200	65836779	0	+	2.18392	exon	opposite
1217	D3	P	11	66399220	66399721	501	-	1.37789	1.61752	RBM14	ENSG00000239306	RNA binding motif protein 14 [Source:HGNC Symbol;Acc:14219]	66384053	66406124	0	+	2.19778	intron	opposite
1224	D3	P	11	66993099	66993600	501	-	0.10484	0.10484	KDM2A	ENSG00000173120	lysine (K)-specific demethylase 2A [Source:HGNC Symbol;Acc:13606]	66886740	67025141	0	+	0.885583	intron	opposite
1225	D3	P	11	67059761	67060262	501	-	2.26154	2.50117	ANKRD13D	ENSG00000172932	ankyrin repeat domain 13 family, member D [Source:HGNC Symbol;Acc:27880]	67056018	67069956	0	+	1.98871	intron	opposite
1229	D3	P	11	68255958	68256459	501	-	0.868671	0.808762	PPP6R3	ENSG00000110075	protein phosphatase 6, regulatory subunit 3 [Source:HGNC Symbol;Acc:1173]	68228186	68382802	0	+	0.885393	utr	opposite
1236	D3	P	11	73791643	73792144	501	-	0	0	C2CD3	ENSG00000168014	C2 calcium-dependent domain containing 3 [Source:HGNC Symbol;Acc:24564]	73723763	73882255	0	-	0.258676	intron	same
1238	D3	P	11	74240154	74240655	501	+	0	0	POLD3	ENSG00000077514	polymerase (DNA-directed), delta 3, accessory subunit [Source:HGNC Symbol;Acc:20932]	74204896	74380162	0	+	0.0320443	utr	same
1247	D3	P	11	81505996	81506497	501	+	0	0				0	NA	84396	NA	NA	NA	NA
1277	D3	P	11	112306366	112306984	618	+	0	0	RP11-65M17.3	ENSG00000254968	No description	112263841	112492452	0	+	0.00526201	utr	same
1301	D3	P	12	6696239	6696740	501	+	2.41131	2.47122	CHD4	ENSG00000111642	chromodomain helicase DNA binding protein 4 [Source:HGNC Symbol;Acc:1919]	6679249	6716642	0	-	1.26226	exon	opposite
1317	D3	P	12	47509572	47510073	501	+	0.389404	0.329496	FAM113B	ENSG00000179715	family with sequence similarity 113, member B [Source:HGNC Symbol;Acc:28255]	47473386	47630443	0	+	1.81009	utr	same
1318	D3	P	12	48068467	48068968	501	+	0.314519	0.314519	RPAP3	ENSG00000005175	RNA polymerase II associated protein 3 [Source:HGNC Symbol;Acc:26151]	48057070	48099844	0	-	0.262422	intron	opposite
1319	D3	P	12	48094268	48094769	501	+	0.419358	0.419358	RPAP3	ENSG00000005175	RNA polymerase II associated protein 3 [Source:HGNC Symbol;Acc:26151]	48057070	48099844	0	-	0.262422	intron	opposite
1329	D3	P	12	53168650	53169272	622	+	0	0	KRT76	ENSG00000185069	keratin 76 [Source:HGNC Symbol;Acc:24430]	53161939	53171129	0	-	0.000818	exon	opposite
1333	D3	P	12	56506219	56506720	501	+	1.21314	1.72236	PA2G4	ENSG00000170515	proliferation-associated 2G4, 38kDa [Source:HGNC Symbol;Acc:8550]	56498103	56509935	0	+	1.05728	exon	same
1347	D3	P	12	78556651	78557152	501	-	0	0	NAV3	ENSG00000067798	neuron navigator 3 [Source:HGNC Symbol;Acc:15998]	78224685	78606790	0	+	0.000374	intron	opposite
1357	D3	P	12	95621384	95621885	501	+	0.389404	0.434335	VEZT	ENSG00000028203	vezatin, adherens junctions transmembrane protein [Source:HGNC Symbol;Acc:18258]	95611522	95696566	0	+	0.360874	intron	same
1358	D3	P	12	96606014	96606515	501	+	0.10484	0.0898625	ELK3	ENSG00000111145	ELK3, ETS-domain protein (SRF accessory protein 2) [Source:HGNC Symbol;Acc:3325]	96588160	96663613	0	+	0.477292	utr	same
1362	D3	P	12	102557631	102558132	501	+	0.0449312	0.0449312	C12orf48	ENSG00000185480	chromosome 12 open reading frame 48 [Source:HGNC Symbol;Acc:26074]	102513956	102591298	0	+	0.0322736	intron	same
1364	D3	P	12	111936056	111936557	501	+	0.0149771	0	ATXN2	ENSG00000204842	ataxin 2 [Source:HGNC Symbol;Acc:10555]	111890018	112037480	0	-	0.157597	intron	opposite
1369	D3	P	12	112492009	112492510	501	-	1.75232	1.7673	NAA25	ENSG00000111300	N(alpha)-acetyltransferase 25, NatB auxiliary subunit [Source:HGNC Symbol;Acc:25783]	112464500	112546826	0	-	0.69416	exon	same
1384	D3	P	12	128534666	128535288	622	+	0	0				0	NA	22955	NA	NA	NA	NA
1391	D3	P	13	20421432	20421933	501	-	0.524198	0.479267	ZMYM5	ENSG00000132950	zinc finger, MYM-type 5 [Source:HGNC Symbol;Acc:13029]	20397622	20437776	0	-	0.500297	intron	same
1392	D3	P	13	21436225	21436726	501	-	0.808762	0.703923	XPO4	ENSG00000132953	exportin 4 [Source:HGNC Symbol;Acc:17796]	21351469	21477187	0	-	0.468325	intron	same
1422	D3	P	13	76893900	76894401	501	+	0	0				0	NA	184554	NA	NA	NA	NA
1423	D3	P	13	80065808	80066309	501	-	0	0	NDFIP2	ENSG00000102471	Nedd4 family interacting protein 2 [Source:HGNC Symbol;Acc:18537]	80055287	80130210	0	+	0.0237825	intron	opposite
1439	D3	P	13	114007510	114008011	501	-	0	0	GRTP1	ENSG00000139835	growth hormone regulated TBC protein 1 [Source:HGNC Symbol;Acc:20310]	113978544	114018446	0	-	0.0180883	intron	same
1450	D3	P	14	21682630	21683131	501	-	0.584106	0.494244	HNRNPC	ENSG00000092199	heterogeneous nuclear ribonucleoprotein C (C1/C2) [Source:HGNC Symbol;Acc:5035]	21677295	21737653	0	-	1.15956	intron	same
1457	D3	P	14	35762043	35762544	501	-	1.36291	1.34794	RP11-561B11.2	ENSG00000258790	No description	35591755	35786680	0	+	0.235013	exon	opposite
1471	D3	P	14	61497293	61497794	501	-	0.149771	0.149771	SLC38A6	ENSG00000139974	solute carrier family 38, member 6 [Source:HGNC Symbol;Acc:19863]	61447832	61550451	0	+	0.151659	intron	opposite
1482	D3	P	14	75997446	75998062	616	+	0.0487423	0.0487423	BATF	ENSG00000156127	basic leucine zipper transcription factor, ATF-like [Source:HGNC Symbol;Acc:958]	75988768	76013358	0	+	0.0580909	intron	same
1483	D3	P	14	81169485	81169986	501	-	0	0	CEP128	ENSG00000100629	centrosomal protein 128kDa [Source:HGNC Symbol;Acc:20359]	80943330	81425861	0	-	0.0219853	intron	same
1510	D3	P	15	44944381	44944882	501	+	1.31798	1.25807	SPG11	ENSG00000104133	spastic paraplegia 11 (autosomal recessive) [Source:HGNC Symbol;Acc:11226]	44854894	44955876	0	-	0.897383	exon	opposite
1520	D3	P	15	60760217	60760718	501	-	0.988487	0.928579	NARG2	ENSG00000128915	NMDA receptor regulated 2 [Source:HGNC Symbol;Acc:29885]	60711808	60771359	0	-	0.357669	exon	same
1529	D3	P	15	75366986	75367487	501	+	0.134794	0.149771				0	NA	23919	NA	NA	NA	NA
1542	D3	P	15	90422456	90422957	501	+	0.0449312	0.10484	AP3S2	ENSG00000157823	adaptor-related protein complex 3, sigma 2 subunit [Source:HGNC Symbol;Acc:571]	90373831	90437574	0	-	0.305722	intron	opposite
1560	D3	P	16	1362015	1362637	622	+	2.95671	3.1136	UBE2I	ENSG00000103275	ubiquitin-conjugating enzyme E2I [Source:HGNC Symbol;Acc:12485]	1359164	1377019	0	+	3.23544	utr	same
1561	D3	P	16	1735896	1736397	501	+	0.134794	0.164748	CRAMP1L	ENSG00000007545	Crm, cramped-like (Drosophila) [Source:HGNC Symbol;Acc:14122]	1662338	1736716	0	+	0.389879	intron	same
1567	D3	P	16	2275499	2276000	501	-	0.119817	0.164748	E4F1	ENSG00000167967	E4F transcription factor 1 [Source:HGNC Symbol;Acc:3121]	2273567	2285743	0	+	1.17745	intron	opposite
1585	D3	P	16	11184578	11185079	501	+	0.0748854	0.0748854	CLEC16A	ENSG00000038532	C-type lectin domain family 16, member A [Source:HGNC Symbol;Acc:29013]	11038345	11276046	0	+	0.277046	intron	same
1587	D3	P	16	11666370	11666984	614	+	1.99271	2.02938	LITAF	ENSG00000189067	lipopolysaccharide-induced TNF factor [Source:HGNC Symbol;Acc:16841]	11641582	11680806	0	-	2.05228	utr	opposite
1588	D3	P	16	11790687	11791304	617	+	0.340644	0.364975	TXNDC11	ENSG00000153066	thioredoxin domain containing 11 [Source:HGNC Symbol;Acc:28030]	11772943	11836704	0	-	0.738266	intron	opposite
1593	D3	P	16	15164615	15165116	501	-	1.42282	1.27305	PDXDC1	ENSG00000179889	pyridoxal-dependent decarboxylase domain containing 1 [Source:HGNC Symbol;Acc:28995]	15068599	15233195	0	+	0.551838	exon	opposite
1600	D3	P	16	17220509	17221010	501	+	0.224656	0.25461	XYLT1	ENSG00000103489	xylosyltransferase I [Source:HGNC Symbol;Acc:15516]	17201254	17564738	0	-	0.165352	intron	opposite
1604	D3	P	16	19563220	19563721	501	+	0.913602	0.928579	CCP110	ENSG00000103540	centriolar coiled coil protein 110kDa [Source:HGNC Symbol;Acc:24342]	19535208	19564730	0	+	0.256958	utr	same
1612	D3	P	16	27424749	27425250	501	-	0.299542	0.25461	IL21R	ENSG00000103522	interleukin 21 receptor [Source:HGNC Symbol;Acc:6006]	27413686	27463362	0	+	0.627184	utr	opposite
1623	D3	P	16	30334964	30335465	501	-	0.0449312	0.0299542				0	NA	26622	NA	NA	NA	NA
1625	D3	P	16	30476300	30476906	606	+	0	0				0	NA	6002	NA	NA	NA	NA
1632	D3	P	16	30774879	30775380	501	-	0.179725	0.35945	RNF40	ENSG00000103549	ring finger protein 40 [Source:HGNC Symbol;Acc:16867]	30773599	30787628	0	+	1.21754	exon	opposite
1645	D3	P	16	51605443	51605944	501	+	0	0				0	NA	99203	NA	NA	NA	NA
1667	D3	P	16	84528391	84528892	501	-	0.0748854	0.0748854	KIAA1609	ENSG00000140950	KIAA1609 [Source:HGNC Symbol;Acc:29325]	84509966	84538296	0	-	0.19877	intron	same
1695	D3	P	16	89794198	89794816	618	+	1.31179	1.37252	ZNF276	ENSG00000158805	zinc finger protein 276 [Source:HGNC Symbol;Acc:23330]	89786808	89807333	0	+	2.74279	intron	same
1702	D3	P	17	1569853	1570468	615	+	0.561446	0.561446	PRPF8	ENSG00000174231	PRP8 pre-mRNA processing factor 8 homolog (S. cerevisiae) [Source:HGNC Symbol;Acc:17340]	1553923	1588154	0	-	3.16734	intron	opposite
1703	D3	P	17	1710154	1710655	501	-	0.0149771	0.0299542	SMYD4	ENSG00000186532	SET and MYND domain containing 4 [Source:HGNC Symbol;Acc:21067]	1682829	1733170	0	-	0.208042	intron	same
1728	D3	P	17	16897088	16897710	622	+	0	0				0	NA	3597	NA	NA	NA	NA
1743	D3	P	17	30319302	30319803	501	+	0.224656	0.25461	SUZ12	ENSG00000178691	suppressor of zeste 12 homolog (Drosophila) [Source:HGNC Symbol;Acc:17101]	30264056	30328064	0	+	0.409465	intron	same
1750	D3	P	17	35387821	35388443	622	+	0.313773	0.277569	AATF	ENSG00000108270	apoptosis antagonizing transcription factor [Source:HGNC Symbol;Acc:19235]	35306175	35414170	0	+	0.330617	intron	same
1759	D3	P	17	38565427	38566043	616	+	0.0121856	0	TOP2A	ENSG00000131747	topoisomerase (DNA) II alpha 170kDa [Source:HGNC Symbol;Acc:11989]	38544768	38574408	0	-	0.0433745	exon	opposite
1764	D3	P	17	40504078	40504579	501	+	0.479267	0.479267	STAT3	ENSG00000168610	signal transducer and activator of transcription 3 (acute-phase response factor) [Source:HGNC Symbol;Acc:11364]	40465342	40540449	0	-	1.69744	utr	opposite
1767	D3	P	17	42375202	42375703	501	-	0	0				0	NA	5679	NA	NA	NA	NA
1777	D3	P	17	45750580	45751081	501	+	2.53113	2.26154	KPNB1	ENSG00000108424	karyopherin (importin) beta 1 [Source:HGNC Symbol;Acc:6400]	45726842	45760998	0	+	1.50691	exon	same
1791	D3	P	17	57882307	57882929	622	+	0.0965457	0.0724092	VMP1	ENSG00000062716	vacuole membrane protein 1 [Source:HGNC Symbol;Acc:29559]	57784863	57917950	0	+	0.281898	intron	same
1792	D3	P	17	58011184	58011685	501	-	0.868671	1.01844	RPS6KB1	ENSG00000108443	ribosomal protein S6 kinase, 70kDa, polypeptide 1 [Source:HGNC Symbol;Acc:10436]	57970447	58027925	0	+	0.916022	exon	opposite
1799	D3	P	17	65177092	65177593	501	+	0.119817	0.0748854	HELZ	ENSG00000198265	helicase with zinc finger [Source:HGNC Symbol;Acc:16878]	65066555	65241319	0	-	0.411965	intron	opposite
1804	D3	P	17	71205990	71206491	501	+	0.479267	0.509221	FAM104A	ENSG00000133193	family with sequence similarity 104, member A [Source:HGNC Symbol;Acc:25918]	71203492	71228510	0	-	0.727538	intron	opposite
1808	D3	P	17	74060275	74060776	501	-	0.25461	0.269587	SRP68	ENSG00000167881	signal recognition particle 68kDa [Source:HGNC Symbol;Acc:11302]	74035187	74068607	0	-	0.745528	intron	same
1817	D3	P	17	75396591	75397092	501	-	0.0599083	0.10484	2017-09-09	ENSG00000184640	septin 9 [Source:HGNC Symbol;Acc:7323]	75277492	75496674	0	+	0.689717	intron	opposite
1825	D3	P	17	76396934	76397435	501	-	0.599083	0.479267	PGS1	ENSG00000087157	phosphatidylglycerophosphate synthase 1 [Source:HGNC Symbol;Acc:30029]	76374735	76420635	0	+	0.905639	exon	opposite
1836	D3	P	17	78749575	78750076	501	+	0.0299542	0.0449312	RPTOR	ENSG00000141564	regulatory associated protein of MTOR, complex 1 [Source:HGNC Symbol;Acc:30287]	78518619	78940173	0	+	0.168257	intron	same
1847	D3	P	17	80149165	80149779	614	+	0.122252	0.134477	CCDC57	ENSG00000176155	coiled-coil domain containing 57 [Source:HGNC Symbol;Acc:27564]	80059346	80170689	0	-	0.805707	intron	opposite
1848	D3	P	17	80225019	80225520	501	-	0.629037	0.629037	CSNK1D	ENSG00000141551	casein kinase 1, delta [Source:HGNC Symbol;Acc:2452]	80202246	80231576	0	-	2.45695	intron	same
1870	D3	P	18	21571235	21571853	618	+	0.0121462	0.0121462	TTC39C	ENSG00000168234	tetratricopeptide repeat domain 39C [Source:HGNC Symbol;Acc:26595]	21572737	21715573	884	+	0.56253	NA	same
1887	D3	P	18	45369797	45370298	501	+	0.269587	0.269587	SMAD2	ENSG00000175387	SMAD family member 2 [Source:HGNC Symbol;Acc:6768]	45357922	45457515	0	-	0.51002	intron	opposite
1888	D3	P	18	50714912	50715413	501	+	0	0	DCC	ENSG00000187323	deleted in colorectal carcinoma [Source:HGNC Symbol;Acc:2701]	49867158	51062269	0	+	0.000365	intron	same
1889	D3	P	18	54696103	54696604	501	-	1.84218	1.97697	WDR7	ENSG00000091157	WD repeat domain 7 [Source:HGNC Symbol;Acc:13490]	54318616	54698828	0	+	0.096954	utr	opposite
1898	D3	P	19	628866	629486	620	+	0.423748	0.29057	POLRMT	ENSG00000099821	polymerase (RNA) mitochondrial (DNA directed) [Source:HGNC Symbol;Acc:9200]	617223	633568	0	-	0.846785	intron	opposite
1911	D3	P	19	1423379	1423880	501	-	5.64636	5.84106	DAZAP1	ENSG00000071626	DAZ associated protein 1 [Source:HGNC Symbol;Acc:2683]	1407584	1435683	0	+	2.49796	intron	opposite
1914	D3	P	19	2265309	2265810	501	+	0	0				0	NA	3710	NA	NA	NA	NA
1928	D3	P	19	4427132	4427809	677	+	0.099803	0.0665353	CHAF1A	ENSG00000167670	chromatin assembly factor 1, subunit A (p150) [Source:HGNC Symbol;Acc:1910]	4402659	4443394	0	+	0.183643	intron	same
1929	D3	P	19	4427188	4427689	501	+	0.134794	0.0898625	CHAF1A	ENSG00000167670	chromatin assembly factor 1, subunit A (p150) [Source:HGNC Symbol;Acc:1910]	4402659	4443394	0	+	0.183643	intron	same
1930	D3	P	19	4427189	4427690	501	+	0.134794	0.0898625	CHAF1A	ENSG00000167670	chromatin assembly factor 1, subunit A (p150) [Source:HGNC Symbol;Acc:1910]	4402659	4443394	0	+	0.183643	intron	same
1931	D3	P	19	4427193	4427694	501	+	0.134794	0.0898625	CHAF1A	ENSG00000167670	chromatin assembly factor 1, subunit A (p150) [Source:HGNC Symbol;Acc:1910]	4402659	4443394	0	+	0.183643	intron	same
1955	D3	P	19	10299114	10299730	616	+	0.134041	0.121856	DNMT1	ENSG00000130816	DNA (cytosine-5-)-methyltransferase 1 [Source:HGNC Symbol;Acc:2976]	10244023	10305755	0	-	0.701879	intron	opposite
1956	D3	P	19	10383475	10384096	621	+	0.0725257	0.0604381	ICAM1	ENSG00000090339	intercellular adhesion molecule 1 [Source:HGNC Symbol;Acc:5344]	10381517	10397291	0	+	0.104377	intron	same
1958	D3	P	19	10485378	10485995	617	+	0.0973268	0.0729951	TYK2	ENSG00000105397	tyrosine kinase 2 [Source:HGNC Symbol;Acc:12440]	10461209	10491352	0	-	1.34936	intron	opposite
1963	D3	P	19	10902058	10902680	622	+	0.313773	0.482728	DNM2	ENSG00000079805	dynamin 2 [Source:HGNC Symbol;Acc:2974]	10824143	10942586	0	+	1.01532	intron	same
1974	D3	P	19	14509050	14509551	501	+	0.569129	0.763831	CD97	ENSG00000123146	CD97 molecule [Source:HGNC Symbol;Acc:1711]	14492213	14519531	0	+	1.77566	intron	same
1976	D3	P	19	16204439	16204940	501	-	0.209679	0.269587	AC020911.1	ENSG00000246896	No description	15050246	16748905	0	+	0.342609	exon	opposite
1977	D3	P	19	16256661	16257162	501	+	0.0898625	0.0599083	AC020911.1	ENSG00000246896	No description	15050246	16748905	0	+	0.342609	intron	same
1987	D3	P	19	18429666	18430167	501	+	2.4862	2.59104	LSM4	ENSG00000130520	LSM4 homolog, U6 small nuclear RNA associated (S. cerevisiae) [Source:HGNC Symbol;Acc:17259]	18417720	18434001	0	-	2.35178	intron	opposite
1988	D3	P	19	18431870	18432371	501	-	5.61641	5.73622	LSM4	ENSG00000130520	LSM4 homolog, U6 small nuclear RNA associated (S. cerevisiae) [Source:HGNC Symbol;Acc:17259]	18417720	18434001	0	-	2.35178	intron	same
1991	D3	P	19	19909887	19910388	501	+	2.32145	2.3514	ZNF506	ENSG00000081665	zinc finger protein 506 [Source:HGNC Symbol;Acc:23780]	19902620	19932560	0	-	1.65884	exon	opposite
1994	D3	P	19	21335284	21335900	616	+	0.316825	0.353381	ZNF431	ENSG00000196705	zinc finger protein 431 [Source:HGNC Symbol;Acc:20809]	21324840	21368805	0	+	0.539869	intron	same
1999	D3	P	19	35480266	35480767	501	+	0.0149771	0				0	NA	4921	NA	NA	NA	NA
2036	D3	P	19	47411896	47412397	501	+	0	0				0	NA	9536	NA	NA	NA	NA
2043	D3	P	19	49595979	49596599	620	+	0.338998	0.314784	SNRNP70	ENSG00000104852	small nuclear ribonucleoprotein 70kDa (U1) [Source:HGNC Symbol;Acc:11150]	49588465	49611869	0	+	3.15838	intron	same
2044	D3	P	19	49818596	49819097	501	-	0.0748854	0.0748854	SLC6A16	ENSG00000063127	solute carrier family 6, member 16 [Source:HGNC Symbol;Acc:13622]	49792897	49828474	0	-	0.165889	utr	same
2047	D3	P	19	50062828	50063438	610	+	6.69404	6.57099	NOSIP	ENSG00000142546	nitric oxide synthase interacting protein [Source:HGNC Symbol;Acc:17946]	50058970	50083813	0	-	1.11337	exon	opposite
2049	D3	P	19	50105088	50105694	606	+	1.85795	1.38727	PRR12	ENSG00000126464	proline rich 12 [Source:HGNC Symbol;Acc:29217]	50094912	50129695	0	+	0.878209	exon	same
2069	D3	P	19	55297506	55298007	501	-	0	0	KIR3DL1	ENSG00000167633	killer cell immunoglobulin-like receptor, three domains, long cytoplasmic tail, 1 [Source:HGNC Symbol;Acc:6338]	55235969	55378448	0	+	0.00496026	intron	opposite
2070	D3	P	19	55760773	55761274	501	+	0.134794	0.0898625	PPP6R1	ENSG00000105063	protein phosphatase 6, regulatory subunit 1 [Source:HGNC Symbol;Acc:29195]	55741148	55770363	0	-	1.63077	utr	opposite
2080	D3	P	20	424279	424780	501	+	0.224656	0.239633	TBC1D20	ENSG00000125875	TBC1 domain family, member 20 [Source:HGNC Symbol;Acc:16133]	416124	443197	0	-	0.595115	intron	opposite
2084	D3	P	20	1631652	1632275	623	+	0	0.0240977	SIRPG	ENSG00000089012	signal-regulatory protein gamma [Source:HGNC Symbol;Acc:15757]	1609798	1638425	0	-	0.466163	intron	opposite
2102	D3	P	20	50006756	50007257	501	-	4.74773	4.56801	NFATC2	ENSG00000101096	nuclear factor of activated T-cells, cytoplasmic, calcineurin-dependent 2 [Source:HGNC Symbol;Acc:7776]	50003494	50179339	0	-	0.303697	utr	same
2143	D3	P	21	46601515	46602016	501	-	1.03342	0.97351	ADARB1	ENSG00000197381	adenosine deaminase, RNA-specific, B1 [Source:HGNC Symbol;Acc:226]	46493768	46646478	0	+	0.249761	intron	opposite
2147	D3	P	22	30317945	30318567	622	+	0.144818	0.156887	MTMR3	ENSG00000100330	myotubularin related protein 3 [Source:HGNC Symbol;Acc:7451]	30279144	31521442	0	+	0.295293	utr	same
2149	D3	P	22	31861248	31861865	617	+	0.14599	0.170322	DRG1	ENSG00000185721	developmentally regulated GTP binding protein 1 [Source:HGNC Symbol;Acc:3029]	31795509	31924726	0	+	0.479266	intron	same
2171	D3	P	22	46117019	46117520	501	+	0.0299542	0.0599083	ATXN10	ENSG00000130638	ataxin 10 [Source:HGNC Symbol;Acc:10549]	46067678	46241187	0	+	0.186543	intron	same
2180	D3	P	22	50981819	50982320	501	-	0.0449312	0.0449312				0	NA	2524	NA	NA	NA	NA
2184	D3	P	X	11892268	11892769	501	+	0	0.0149771				0	NA	98398	NA	NA	NA	NA
2192	D3	P	X	20446389	20446890	501	+	0	0				0	NA	23336	NA	NA	NA	NA
2203	D3	P	X	46551800	46552301	501	-	0.0149771	0.0149771	SLC9A7	ENSG00000065923	solute carrier family 9 (sodium/hydrogen exchanger), member 7 [Source:HGNC Symbol;Acc:17123]	46464753	46618490	0	-	0.0407864	intron	same
2212	D3	P	X	63164548	63165049	501	+	0	0				0	NA	158581	NA	NA	NA	NA
2222	D3	P	X	87120918	87121533	615	+	0	0				0	NA	195868	NA	NA	NA	NA
2224	D3	P	X	107288529	107289030	501	+	0.0599083	0.0599083	VSIG1	ENSG00000101842	V-set and immunoglobulin domain containing 1 [Source:HGNC Symbol;Acc:28675]	107288200	107322414	0	+	0.386088	intron	same
2230	D3	P	X	131177982	131178483	501	+	0.179725	0.149771	MST4	ENSG00000134602	Serine/threonine-protein kinase MST4 [Source:UniProtKB/Swiss-Prot;Acc:Q9P289]	131157293	131209971	0	+	0.93355	intron	same
2240	D3	P	X	153359899	153360400	501	+	1.15324	1.09333	MECP2	ENSG00000169057	methyl CpG binding protein 2 (Rett syndrome) [Source:HGNC Symbol;Acc:6990]	153287024	153402578	0	-	1.27871	intron	opposite
46	D3	RL	1	36475393	36475894	501	+	0.0149771	0.0149771	EIF2C3	ENSG00000126070	eukaryotic translation initiation factor 2C, 3 [Source:HGNC Symbol;Acc:18421]	36396319	36522063	0	+	0.264159	intron	same
82	D3	RL	1	112239551	112240173	622	+	0.67582	0.699956	RAP1A	ENSG00000116473	RAP1A, member of RAS oncogene family [Source:HGNC Symbol;Acc:9855]	112084840	112259313	0	+	0.391796	exon	same
125	D3	RL	1	157251798	157252411	613	+	0	0				0	NA	5082	NA	NA	NA	NA
126	D3	RL	1	159122546	159123047	501	-	0	0				0	NA	5660	NA	NA	NA	NA
167	D3	RL	1	241076042	241076543	501	-	0	0	RGS7	ENSG00000182901	regulator of G-protein signaling 7 [Source:HGNC Symbol;Acc:10003]	240931554	241520530	0	-	0.000881	intron	same
274	D3	RL	2	185560645	185561258	613	+	0	0	ZNF804A	ENSG00000170396	zinc finger protein 804A [Source:HGNC Symbol;Acc:21711]	185463093	185804219	0	+	0.000639	intron	same
289	D3	RL	2	205765118	205765770	652	+	0	0	PARD3B	ENSG00000116117	par-3 partitioning defective 3 homolog B (C. elegans) [Source:HGNC Symbol;Acc:14446]	205410516	206484886	0	+	0.00225337	intron	same
315	D3	RL	2	241861181	241861682	501	-	0	0	AC104809.3	ENSG00000226321	No description	241858202	241932728	0	+	0.00332913	intron	opposite
316	D3	RL	2	241861184	241861685	501	-	0	0	AC104809.3	ENSG00000226321	No description	241858202	241932728	0	+	0.00332913	intron	opposite
391	D3	RL	3	124882545	124883046	501	+	0	0	SLC12A8	ENSG00000221955	solute carrier family 12 (potassium/chloride transporters), member 8 [Source:HGNC Symbol;Acc:15595]	124801480	124998021	0	-	0.220534	intron	opposite
401	D3	RL	3	141176331	141176832	501	+	0	0				0	NA	7697	NA	NA	NA	NA
481	D3	RL	4	92621472	92622092	620	+	0	0				0	NA	98408	NA	NA	NA	NA
492	D3	RL	4	110103996	110104497	501	+	0	0	COL25A1	ENSG00000188517	collagen, type XXV, alpha 1 [Source:HGNC Symbol;Acc:18603]	109731877	110223813	0	-	0.00132966	intron	opposite
510	D3	RL	4	135620131	135620632	501	+	0	0				0	NA	59922	NA	NA	NA	NA
533	D3	RL	4	175181616	175182117	501	-	0.0299542	0.0149771	FBXO8	ENSG00000164117	F-box protein 8 [Source:HGNC Symbol;Acc:13587]	175157809	175205415	0	-	0.250948	intron	same
546	D3	RL	5	7042902	7043521	619	+	0	0	RP11-122F24.1	ENSG00000250974	No description	6933783	7190925	0	+	0.000263	utr	same
547	D3	RL	5	7043015	7043516	501	-	0	0	RP11-122F24.1	ENSG00000250974	No description	6933783	7190925	0	+	0.000263	utr	opposite
548	D3	RL	5	7043016	7043517	501	-	0	0	RP11-122F24.1	ENSG00000250974	No description	6933783	7190925	0	+	0.000263	utr	opposite
549	D3	RL	5	7043018	7043519	501	-	0	0	RP11-122F24.1	ENSG00000250974	No description	6933783	7190925	0	+	0.000263	utr	opposite
593	D3	RL	5	87350527	87351028	501	+	0	0				0	NA	134422	NA	NA	NA	NA
638	D3	RL	5	165069037	165069538	501	-	0	0	CTC-535M15.2	ENSG00000253693	No description	164776036	165205694	0	+	0.000385	utr	opposite
719	D3	RL	6	67636102	67636603	501	-	0	0				0	NA	197305	NA	NA	NA	NA
794	D3	RL	7	13646634	13647135	501	-	0	0	AC011288.2	ENSG00000229618	No description	13141016	13743774	0	+	0.000412	utr	opposite
865	D3	RL	7	113517043	113517544	501	-	0	0	PPP1R3A	ENSG00000154415	protein phosphatase 1, regulatory subunit 3A [Source:HGNC Symbol;Acc:9291]	113516832	113715975	0	-	0.00034	utr	same
892	D3	RL	7	153731192	153731693	501	-	0	0	DPP6	ENSG00000130226	dipeptidyl-peptidase 6 [Source:HGNC Symbol;Acc:3010]	153584182	154685995	0	+	0.000703	intron	opposite
907	D3	RL	8	19370233	19370734	501	+	0.25461	0.269587	CSGALNACT1	ENSG00000147408	chondroitin sulfate N-acetylgalactosaminyltransferase 1 [Source:HGNC Symbol;Acc:24290]	19261672	19615540	0	-	0.402941	utr	opposite
908	D3	RL	8	19370235	19370849	614	+	0.232279	0.268954	CSGALNACT1	ENSG00000147408	chondroitin sulfate N-acetylgalactosaminyltransferase 1 [Source:HGNC Symbol;Acc:24290]	19261672	19615540	0	-	0.402941	utr	opposite
964	D3	RL	8	124110482	124110983	501	+	0.0449312	0.0299542	WDR67	ENSG00000156787	WD repeat domain 67 [Source:HGNC Symbol;Acc:30888]	124054208	124164393	0	+	0.0828368	intron	same
999	D3	RL	9	34823310	34823917	607	+	0	0				0	NA	6984	NA	NA	NA	NA
1007	D3	RL	9	84223497	84223998	501	+	0.0149771	0.0149771	TLE1	ENSG00000196781	transducin-like enhancer of split 1 (E(sp1) homolog, Drosophila) [Source:HGNC Symbol;Acc:11837]	84198598	84304220	0	-	0.0150907	intron	opposite
1008	D3	RL	9	84223498	84224116	618	+	0.0121462	0.0121462	TLE1	ENSG00000196781	transducin-like enhancer of split 1 (E(sp1) homolog, Drosophila) [Source:HGNC Symbol;Acc:11837]	84198598	84304220	0	-	0.0150907	intron	opposite
1024	D3	RL	9	103595823	103596324	501	+	0	0				0	NA	194667	NA	NA	NA	NA
1025	D3	RL	9	103843763	103844264	501	-	0	0	RP11-35N6.1	ENSG00000148123	Lipid phosphate phosphatase-related protein type 1 [Source:UniProtKB/Swiss-Prot;Acc:Q8TBJ4]	103790991	104087417	0	+	0.00038	utr	opposite
1040	D3	RL	9	131269827	131270438	611	+	0.098281	0.0859958	GLE1	ENSG00000119392	GLE1 RNA export mediator homolog (yeast) [Source:HGNC Symbol;Acc:4315]	131266979	131304567	0	+	0.571053	intron	same
1084	D3	RL	10	44383652	44384153	501	+	0	0.0149771	RP11-168P8.2	ENSG00000226808	No description	44354859	44390881	0	+	0.000209	utr	same
1116	D3	RL	10	85108467	85108968	501	+	0	0				0	NA	280640	NA	NA	NA	NA
1235	D3	RL	11	71702205	71702706	501	+	0.25461	0.224656	RNF121	ENSG00000137522	ring finger protein 121 [Source:HGNC Symbol;Acc:21070]	71639747	71708643	0	+	0.113273	intron	same
1267	D3	RL	11	103101906	103102407	501	-	0	0	DYNC2H1	ENSG00000187240	dynein, cytoplasmic 2, heavy chain 1 [Source:HGNC Symbol;Acc:2962]	102980160	103350591	0	+	0.0114676	exon	opposite
1278	D3	RL	11	113870407	113870908	501	-	0	0				0	NA	9372	NA	NA	NA	NA
1511	D3	RL	15	47555126	47555739	613	+	0	0	SEMA6D	ENSG00000137872	sema domain, transmembrane domain (TM), and cytoplasmic domain, (semaphorin) 6D [Source:HGNC Symbol;Acc:16770]	47476298	48066420	0	+	0.00212767	utr	same
1583	D3	RL	16	8866560	8867182	622	+	0.362046	0.33791	ABAT	ENSG00000183044	4-aminobutyrate aminotransferase [Source:HGNC Symbol;Acc:23]	8768422	8878432	0	+	0.159991	exon	same
1657	D3	RL	16	68130346	68130972	626	+	0.131903	0.0959297	NFATC3	ENSG00000072736	nuclear factor of activated T-cells, cytoplasmic, calcineurin-dependent 3 [Source:HGNC Symbol;Acc:7777]	68111243	68263162	0	+	0.599916	intron	same
1658	D3	RL	16	68130463	68130964	501	-	0.119817	0.134794	NFATC3	ENSG00000072736	nuclear factor of activated T-cells, cytoplasmic, calcineurin-dependent 3 [Source:HGNC Symbol;Acc:7777]	68111243	68263162	0	+	0.599916	intron	opposite
1720	D3	RL	17	7576764	7577386	622	+	2.46191	2.22055	TP53	ENSG00000141510	tumor protein p53 [Source:HGNC Symbol;Acc:11998]	7565097	7590856	0	-	0.59716	exon	opposite
1794	D3	RL	17	60061582	60062083	501	+	2.4862	2.57606	MED13	ENSG00000108510	mediator complex subunit 13 [Source:HGNC Symbol;Acc:22474]	60019967	60142643	0	-	0.648416	exon	opposite
1810	D3	RL	17	74186103	74186604	501	-	0.25461	0.164748	RNF157	ENSG00000141576	ring finger protein 157 [Source:HGNC Symbol;Acc:29402]	74138534	74236390	0	-	0.788444	intron	same
1818	D3	RL	17	75482652	75483332	680	+	0.320171	0.364332	2017-09-09	ENSG00000184640	septin 9 [Source:HGNC Symbol;Acc:7323]	75277492	75496674	0	+	0.689717	intron	same
1819	D3	RL	17	75482719	75483220	501	+	0.329496	0.35945	2017-09-09	ENSG00000184640	septin 9 [Source:HGNC Symbol;Acc:7323]	75277492	75496674	0	+	0.689717	intron	same
1820	D3	RL	17	75482719	75483332	613	+	0.318373	0.342863	2017-09-09	ENSG00000184640	septin 9 [Source:HGNC Symbol;Acc:7323]	75277492	75496674	0	+	0.689717	intron	same
1821	D3	RL	17	75482720	75483221	501	+	0.329496	0.35945	2017-09-09	ENSG00000184640	septin 9 [Source:HGNC Symbol;Acc:7323]	75277492	75496674	0	+	0.689717	intron	same
1822	D3	RL	17	75482720	75483332	612	+	0.318892	0.343422	2017-09-09	ENSG00000184640	septin 9 [Source:HGNC Symbol;Acc:7323]	75277492	75496674	0	+	0.689717	intron	same
1823	D3	RL	17	75482721	75483222	501	+	0.329496	0.35945	2017-09-09	ENSG00000184640	septin 9 [Source:HGNC Symbol;Acc:7323]	75277492	75496674	0	+	0.689717	intron	same
1932	D3	RL	19	4868437	4869059	622	+	0.929252	0.772365	PLIN3	ENSG00000105355	perilipin 3 [Source:HGNC Symbol;Acc:16893]	4838346	4867780	657	-	0.491952	NA	opposite
1933	D3	RL	19	4868554	4869055	501	-	0.838716	0.958533	PLIN3	ENSG00000105355	perilipin 3 [Source:HGNC Symbol;Acc:16893]	4838346	4867780	774	-	0.491952	NA	same
1934	D3	RL	19	4868555	4869056	501	-	0.823739	0.958533	PLIN3	ENSG00000105355	perilipin 3 [Source:HGNC Symbol;Acc:16893]	4838346	4867780	775	-	0.491952	NA	same
1971	D3	RL	19	13005920	13006421	501	-	0.434335	0.389404	GCDH	ENSG00000105607	glutaryl-CoA dehydrogenase [Source:HGNC Symbol;Acc:4189]	13001974	13010783	0	+	1.17002	intron	opposite
1992	D3	RL	19	19993193	19993694	501	+	0.164748	0.164748	AC011477.2	ENSG00000245381	No description	19945686	20008579	0	-	0.196169	intron	opposite
1996	D3	RL	19	30033924	30034425	501	-	0	0	VSTM2B	ENSG00000187135	V-set and transmembrane domain containing 2B [Source:HGNC Symbol;Acc:33595]	30017491	30055226	0	+	0.000598	intron	opposite
2059	D3	RL	19	52683932	52684433	501	+	0	0				0	NA	8841	NA	NA	NA	NA
2074	D3	RL	19	56922813	56923432	619	+	0	0.0121266	ZNF583	ENSG00000198440	zinc finger protein 583 [Source:HGNC Symbol;Acc:26427]	56915383	56938733	0	+	0.0354175	intron	same
2162	D3	RL	22	40631256	40631876	620	+	0.532711	0.532711	TNRC6B	ENSG00000100354	trinucleotide repeat containing 6B [Source:HGNC Symbol;Acc:29190]	40440821	40731811	0	+	1.13734	intron	same
2206	D3	RL	X	51052803	51053304	501	+	0.329496	0.419358				0	NA	21779	NA	NA	NA	NA
2208	D3	RL	X	53251060	53251561	501	-	0.509221	0.419358	KDM5C	ENSG00000126012	lysine (K)-specific demethylase 5C [Source:HGNC Symbol;Acc:11114]	53220503	53254604	0	-	1.38919	intron	same

## Sheet: PIC 3 donors
	donor	status	chromosome	start	end	size	strand	expression over integration site (same strand)	expression over integration site (opposite strand)	gene symbol	ensembl accession	description gene	start gene	end gene	distance to closest gene		gene strand	expression gene	integration utr/intron	direction integration and gene
676	D1	P	6	30506087	30506588	501	-	0.269587	0.194702				0	NA	2566		NA	NA	NA	NA
259	D1	P	2	157275205	157275819	614	+	0.0122252	0.0122252				0	NA	2888		NA	NA	NA	NA
2157	D1	P	22	39660035	39660536	501	+	0	0				0	NA	2972		NA	NA	NA	NA
2158	D1	P	22	39660050	39660648	598	+	0	0				0	NA	2987		NA	NA	NA	NA
2193	D1	P	X	22403713	22404335	622	+	0	0				0	NA	3097		NA	NA	NA	NA
1063	D1	P	10	6630787	6631409	622	+	5.06865	4.73074				0	NA	3146		NA	NA	NA	NA
1252	D1	P	11	88074360	88074860	500	+	0	0				0	NA	3405		NA	NA	NA	NA
1253	D1	P	11	88074360	88074861	501	+	0	0				0	NA	3405		NA	NA	NA	NA
1254	D1	P	11	88074361	88074861	500	+	0	0				0	NA	3406		NA	NA	NA	NA
1255	D1	P	11	88074380	88074976	596	+	0	0				0	NA	3425		NA	NA	NA	NA
201	D1	P	2	27924577	27925195	618	+	0.0121462	0.0121462				0	NA	3458		NA	NA	NA	NA
1064	D1	P	10	6631262	6631763	501	-	5.00234	4.86755				0	NA	3621		NA	NA	NA	NA
755	D1	P	6	139786851	139787464	613	+	0	0				0	NA	3837		NA	NA	NA	NA
554	D1	P	5	16660666	16661167	501	-	0.119817	0.10484				0	NA	4228		NA	NA	NA	NA
81	D1	P	1	112010520	112011021	501	+	0.688946	0.673969				0	NA	5125		NA	NA	NA	NA
1021	D1	P	9	99387429	99387930	501	-	0	0				0	NA	5317		NA	NA	NA	NA
1659	D1	P	16	68514531	68515032	501	+	0.0149771	0				0	NA	5964		NA	NA	NA	NA
1660	D1	P	16	68514536	68515149	613	+	0.0244902	0				0	NA	5969		NA	NA	NA	NA
2204	D1	P	X	47281111	47281612	501	+	0.149771	0.194702				0	NA	7407		NA	NA	NA	NA
864	D1	P	7	112450136	112450754	618	+	0.0121462	0.0121462				0	NA	8448		NA	NA	NA	NA
1973	D1	P	19	14482847	14483348	501	-	0	0				0	NA	8865		NA	NA	NA	NA
1868	D1	P	18	20471883	20472498	615	+	0	0				0	NA	8989		NA	NA	NA	NA
1136	D1	P	10	121893567	121894068	501	-	0	0				0	NA	9829		NA	NA	NA	NA
1778	D1	P	17	45799554	45800169	615	+	0	0				0	NA	10127		NA	NA	NA	NA
1608	D1	P	16	22396642	22397143	501	+	0.584106	0.524198				0	NA	10704		NA	NA	NA	NA
1314	D1	P	12	44211375	44211876	501	-	0	0				0	NA	11197		NA	NA	NA	NA
887	D1	P	7	150250608	150251230	622	+	0.144818	0.120682				0	NA	13135		NA	NA	NA	NA
888	D1	P	7	150250726	150251227	501	-	0.119817	0.149771				0	NA	13138		NA	NA	NA	NA
1393	D1	P	13	21766578	21767079	501	+	0	0				0	NA	13355		NA	NA	NA	NA
1943	D1	P	19	6648650	6649151	501	-	0.0149771	0				0	NA	13997		NA	NA	NA	NA
507	D1	P	4	130205587	130206088	501	+	0	0				0	NA	14242		NA	NA	NA	NA
384	D1	P	3	120185948	120186570	622	+	0	0				0	NA	15848		NA	NA	NA	NA
173	D1	P	2	371632	372252	620	+	0	0				0	NA	16160		NA	NA	NA	NA
784	D1	P	7	4665919	4666420	501	-	0	0				0	NA	16968		NA	NA	NA	NA
1627	D1	P	16	30643710	30644332	622	+	0	0				0	NA	17891		NA	NA	NA	NA
1441	D1	P	13	114918717	114919339	622	+	0.156887	0.156887				0	NA	20631		NA	NA	NA	NA
592	D1	P	5	86780279	86780780	501	+	0.0149771	0				0	NA	22234		NA	NA	NA	NA
939	D1	P	8	81474498	81475103	605	+	0	0				0	NA	22717		NA	NA	NA	NA
937	D1	P	8	81474485	81475102	617	+	0	0				0	NA	22718		NA	NA	NA	NA
938	D1	P	8	81474488	81474989	501	+	0	0				0	NA	22831		NA	NA	NA	NA
936	D1	P	8	81474485	81474986	501	+	0	0				0	NA	22834		NA	NA	NA	NA
935	D1	P	8	81474485	81474985	500	+	0	0				0	NA	22835		NA	NA	NA	NA
642	D1	P	5	173983059	173983560	501	+	0	0				0	NA	23599		NA	NA	NA	NA
1307	D1	P	12	9940785	9941398	613	+	0	0				0	NA	27288		NA	NA	NA	NA
399	D1	P	3	138625983	138626596	613	+	0.0122451	0.0244902				0	NA	27435		NA	NA	NA	NA
2121	D1	P	21	25232485	25233104	619	+	0	0				0	NA	28010		NA	NA	NA	NA
247	D1	P	2	136806031	136806532	501	+	0	0				0	NA	28930		NA	NA	NA	NA
530	D1	P	4	171233882	171234502	620	+	0	0				0	NA	29652		NA	NA	NA	NA
667	D1	P	6	14906519	14907141	622	+	0	0				0	NA	34560		NA	NA	NA	NA
1669	D1	P	16	85599168	85599779	611	+	0.0491405	0.0491405				0	NA	45244		NA	NA	NA	NA
1668	D1	P	16	85599166	85599667	501	+	0.0449312	0.0449312				0	NA	45356		NA	NA	NA	NA
1352	D1	P	12	92766146	92766647	501	-	0	0				0	NA	47223		NA	NA	NA	NA
970	D1	P	8	134965560	134966173	613	+	0	0				0	NA	50985		NA	NA	NA	NA
717	D1	P	6	63055895	63056508	613	+	0	0				0	NA	59763		NA	NA	NA	NA
708	D1	P	6	41385944	41386445	501	-	0	0				0	NA	62698		NA	NA	NA	NA
371	D1	P	3	89090538	89091039	501	-	0	0				0	NA	65635		NA	NA	NA	NA
788	D1	P	7	9917748	9918249	501	-	0	0				0	NA	82402		NA	NA	NA	NA
335	D1	P	3	19827303	19827965	662	+	0	0				0	NA	92999		NA	NA	NA	NA
337	D1	P	3	19827347	19827848	501	+	0	0				0	NA	93116		NA	NA	NA	NA
336	D1	P	3	19827346	19827847	501	+	0	0				0	NA	93117		NA	NA	NA	NA
2227	D1	P	X	115733095	115733596	501	-	0	0				0	NA	93282		NA	NA	NA	NA
2209	D1	P	X	56416428	56417042	614	+	0	0.0122252				0	NA	102106		NA	NA	NA	NA
1316	D1	P	12	46966868	46967369	501	-	0.0299542	0				0	NA	116817		NA	NA	NA	NA
830	D1	P	7	62350956	62351457	501	-	0	0				0	NA	120384		NA	NA	NA	NA
377	D1	P	3	106044825	106045447	622	+	0	0				0	NA	189297		NA	NA	NA	NA
1647	D1	P	16	54535313	54536024	711	+	0	0				0	NA	214638		NA	NA	NA	NA
1648	D1	P	16	54535409	54535910	501	+	0	0				0	NA	214734		NA	NA	NA	NA
2234	D1	P	X	137256425	137257038	613	+	0	0				0	NA	222472		NA	NA	NA	NA
1895	D1	P	18	73656479	73657101	622	+	0	0				0	NA	412543		NA	NA	NA	NA
120	D1	P	1	155489676	155490177	501	+	0.25461	0.224656	ASH1L	ENSG00000116539	ash1 (absent, small, or homeotic)-like (Drosophila) [Source:HGNC Symbol;Acc:19088]	155305059	155532598	0		-	0.630253	exon	opposite
447	D1	P	4	27010140	27010641	501	-	4.1187	4.55303	STIM2	ENSG00000109689	stromal interaction molecule 2 [Source:HGNC Symbol;Acc:19205]	26859300	27027003	0		+	0.304229	exon	opposite
540	D1	P	4	184604917	184605418	501	-	0.898625	0.838716	C4orf41	ENSG00000168538	chromosome 4 open reading frame 41 [Source:HGNC Symbol;Acc:25751]	184580420	184634745	0		+	0.397335	exon	opposite
685	D1	P	6	31498364	31498976	612	+	10.0696	10.0206	ATP6V1G2-DDX39B	ENSG00000254870	ATP6V1G2-DDX39B readthrough (non-protein coding) [Source:HGNC Symbol;Acc:41999]	31497996	31514385	0		-	5.16845	exon	opposite
895	D1	P	7	155537512	155538013	501	-	6.32033	6.79959	RBM33	ENSG00000184863	RNA binding motif protein 33 [Source:HGNC Symbol;Acc:27223]	155437145	155574179	0		+	0.744415	exon	opposite
951	D1	P	8	103305782	103306404	622	+	3.62046	4.10319	UBR5	ENSG00000104517	ubiquitin protein ligase E3 component n-recognin 5 [Source:HGNC Symbol;Acc:16806]	103264501	103425069	0		-	0.611241	exon	opposite
975	D1	P	8	145058617	145059118	501	+	5.76618	5.12216	PARP10	ENSG00000178685	poly (ADP-ribose) polymerase family, member 10 [Source:HGNC Symbol;Acc:25895]	145051321	145086940	0		-	0.756282	exon	opposite
1050	D1	P	9	139757111	139757612	501	+	3.29496	2.96546	EDF1	ENSG00000107223	endothelial differentiation-related factor 1 [Source:HGNC Symbol;Acc:3164]	139756571	139760738	0		-	1.6343	exon	opposite
1146	D1	P	11	244372	244873	501	-	2.36638	2.30647	PSMD13	ENSG00000185627	proteasome (prosome, macropain) 26S subunit, non-ATPase, 13 [Source:HGNC Symbol;Acc:9558]	236546	252983	0		+	1.9265	exon	opposite
1226	D1	P	11	67174151	67174652	501	+	8.68671	8.40214	PPP1CA	ENSG00000172531	protein phosphatase 1, catalytic subunit, alpha isozyme [Source:HGNC Symbol;Acc:9281]	67165654	67188654	0		-	2.26852	exon	opposite
1231	D1	P	11	70347387	70348062	675	+	0	0	SHANK2	ENSG00000162105	SH3 and multiple ankyrin repeat domains 2 [Source:HGNC Symbol;Acc:14295]	70313961	70963623	0		-	0.000648	exon	opposite
1373	D1	P	12	118636383	118637011	628	+	2.48624	1.99617	TAOK3	ENSG00000135090	TAO kinase 3 [Source:HGNC Symbol;Acc:18133]	118587606	118810750	0		-	0.346334	exon	opposite
1519	D1	P	15	60644594	60645210	616	+	0.0487423	0.0487423	ANXA2	ENSG00000182718	annexin A2 [Source:HGNC Symbol;Acc:537]	60639333	60695082	0		-	0.0323666	exon	opposite
1615	D1	P	16	29811170	29811671	501	-	4.13367	4.23851	KIF22	ENSG00000079616	kinesin family member 22 [Source:HGNC Symbol;Acc:6391]	29802041	29816706	0		+	1.91525	exon	opposite
1616	D1	P	16	29811171	29811672	501	-	4.13367	4.25349	KIF22	ENSG00000079616	kinesin family member 22 [Source:HGNC Symbol;Acc:6391]	29802041	29816706	0		+	1.91525	exon	opposite
1619	D1	P	16	30092617	30093118	501	-	0.943556	1.07835	PPP4C	ENSG00000149923	protein phosphatase 4, catalytic subunit [Source:HGNC Symbol;Acc:9319]	30087311	30096698	0		+	1.71945	exon	opposite
1620	D1	P	16	30092618	30093119	501	-	0.928579	1.06337	PPP4C	ENSG00000149923	protein phosphatase 4, catalytic subunit [Source:HGNC Symbol;Acc:9319]	30087311	30096698	0		+	1.71945	exon	opposite
1621	D1	P	16	30092620	30093121	501	-	0.928579	1.03342	PPP4C	ENSG00000149923	protein phosphatase 4, catalytic subunit [Source:HGNC Symbol;Acc:9319]	30087311	30096698	0		+	1.71945	exon	opposite
1622	D1	P	16	30092621	30093122	501	-	0.913602	1.00346	PPP4C	ENSG00000149923	protein phosphatase 4, catalytic subunit [Source:HGNC Symbol;Acc:9319]	30087311	30096698	0		+	1.71945	exon	opposite
1807	D1	P	17	73987150	73987651	501	-	0.928579	0.853694	C17orf106	ENSG00000257949	CST complex subunit TEN1 [Source:UniProtKB/Swiss-Prot;Acc:Q86WV5]	73975301	73996667	0		+	0.148139	exon	opposite
1921	D1	P	19	3759891	3760392	501	+	2.80071	3.10026	APBA3	ENSG00000011132	amyloid beta (A4) precursor protein-binding, family A, member 3 [Source:HGNC Symbol;Acc:580]	3750771	3761673	0		-	1.0654	exon	opposite
1922	D1	P	19	3759895	3760396	501	+	2.77076	3.0703	APBA3	ENSG00000011132	amyloid beta (A4) precursor protein-binding, family A, member 3 [Source:HGNC Symbol;Acc:580]	3750771	3761673	0		-	1.0654	exon	opposite
1923	D1	P	19	3759906	3760509	603	+	2.27795	2.47712	APBA3	ENSG00000011132	amyloid beta (A4) precursor protein-binding, family A, member 3 [Source:HGNC Symbol;Acc:580]	3750771	3761673	0		-	1.0654	exon	opposite
1924	D1	P	19	3979202	3979824	622	+	10.0407	9.66664	EEF2	ENSG00000167658	eukaryotic translation elongation factor 2 [Source:HGNC Symbol;Acc:3214]	3972316	3985461	0		-	7.57626	exon	opposite
2027	D1	P	19	46116602	46117205	603	+	0.697079	0.734422	EML2	ENSG00000125746	echinoderm microtubule associated protein like 2 [Source:HGNC Symbol;Acc:18035]	46112660	46148726	0		-	0.295803	exon	opposite
2095	D1	P	20	34323535	34324157	622	+	3.40324	3.21014	RBM39	ENSG00000131051	RNA binding motif protein 39 [Source:HGNC Symbol;Acc:15923]	34291531	34330234	0		-	2.76077	exon	opposite
11	D1	P	1	9842680	9843181	501	+	0.0599083	0.0898625	CLSTN1	ENSG00000171603	calsyntenin 1 [Source:HGNC Symbol;Acc:17447]	9789084	9884584	0		-	0.733419	intron	opposite
13	D1	P	1	11292797	11293410	613	+	0.0857157	0.159186	MTOR	ENSG00000198793	mechanistic target of rapamycin (serine/threonine kinase) [Source:HGNC Symbol;Acc:3942]	11166592	11322608	0		-	0.295069	intron	opposite
32	D1	P	1	28362323	28362936	613	+	0.0244902	0.0244902	EYA3	ENSG00000158161	eyes absent homolog 3 (Drosophila) [Source:HGNC Symbol;Acc:3521]	28296855	28415207	0		-	0.175459	intron	opposite
45	D1	P	1	36013353	36013969	616	+	0.158412	0.207155	KIAA0319L	ENSG00000142687	KIAA0319-like [Source:HGNC Symbol;Acc:30071]	35899091	36023551	0		-	0.462004	intron	opposite
57	D1	P	1	47492298	47492799	501	-	0	0	CYP4X1	ENSG00000186377	cytochrome P450, family 4, subfamily X, polypeptide 1 [Source:HGNC Symbol;Acc:20244]	47427036	47516423	0		+	0.000589	intron	opposite
97	D1	P	1	150664608	150665230	622	+	0.0724092	0.0965457	GOLPH3L	ENSG00000143457	golgi phosphoprotein 3-like [Source:HGNC Symbol;Acc:24882]	150618701	150669672	0		-	0.0734562	intron	opposite
130	D1	P	1	174253824	174254325	501	-	0.0599083	0.0748854	RABGAP1L	ENSG00000152061	RAB GTPase activating protein 1-like [Source:HGNC Symbol;Acc:24663]	174128548	174964445	0		+	0.151935	intron	opposite
159	D1	P	1	226919808	226920421	613	+	4.31028	3.55108	ITPKB	ENSG00000143772	inositol-trisphosphate 3-kinase B [Source:HGNC Symbol;Acc:6179]	226819391	226927024	0		-	3.09928	intron	opposite
234	D1	P	2	102363643	102364144	501	-	0.209679	0.194702	MAP4K4	ENSG00000071054	mitogen-activated protein kinase kinase kinase kinase 4 [Source:HGNC Symbol;Acc:6866]	102313312	102508449	0		+	0.325455	intron	opposite
280	D1	P	2	191750811	191751312	501	-	0.7189	0.673969	GLS	ENSG00000115419	glutaminase [Source:HGNC Symbol;Acc:4331]	191745553	191830278	0		+	1.25841	intron	opposite
281	D1	P	2	192147609	192148110	501	-	0	0	MYO1B	ENSG00000128641	myosin IB [Source:HGNC Symbol;Acc:7596]	192109911	192290115	0		+	0.00258676	intron	opposite
318	D1	P	3	4061719	4062220	501	+	0.0449312	0.0299542	SUMF1	ENSG00000144455	sulfatase modifying factor 1 [Source:HGNC Symbol;Acc:20376]	3742498	4508965	0		-	0.0900786	intron	opposite
404	D1	P	3	143004586	143005200	614	+	0.158928	0.207828	SLC9A9	ENSG00000181804	solute carrier family 9 (sodium/hydrogen exchanger), member 9 [Source:HGNC Symbol;Acc:20653]	142984064	143567373	0		-	0.0714199	intron	opposite
412	D1	P	3	169817279	169817893	614	+	2.42059	2.13941	PHC3	ENSG00000173889	polyhomeotic homolog 3 (Drosophila) [Source:HGNC Symbol;Acc:15682]	169804520	169899537	0		-	1.342	intron	opposite
463	D1	P	4	68430115	68430616	501	-	0	0	STAP1	ENSG00000035720	signal transducing adaptor family member 1 [Source:HGNC Symbol;Acc:24133]	68424446	68473055	0		+	0.069756	intron	opposite
488	D1	P	4	106145554	106146055	501	-	0.0299542	0.0299542	TET2	ENSG00000168769	tet methylcytosine dioxygenase 2 [Source:HGNC Symbol;Acc:25941]	106067032	106200973	0		+	0.132473	intron	opposite
512	D1	P	4	140621252	140621753	501	-	0	0.0149771	MGST2	ENSG00000085871	microsomal glutathione S-transferase 2 [Source:HGNC Symbol;Acc:7063]	140586922	140661899	0		+	0.0409126	intron	opposite
513	D1	P	4	141451910	141452411	501	-	0.119817	0.0898625	ELMOD2	ENSG00000179387	ELMO/CED-12 domain containing 2 [Source:HGNC Symbol;Acc:28111]	141445312	141474924	0		+	0.490265	intron	opposite
610	D1	P	5	125798592	125799093	501	-	0.239633	0.239633	GRAMD3	ENSG00000155324	GRAM domain containing 3 [Source:HGNC Symbol;Acc:24911]	125695824	125832186	0		+	0.160225	intron	opposite
632	D1	P	5	156677274	156677775	501	-	0.539175	0.554152	ITK	ENSG00000113263	IL2-inducible T-cell kinase [Source:HGNC Symbol;Acc:6171]	156569944	156682201	0		+	2.16169	intron	opposite
700	D1	P	6	36499715	36500335	620	+	0.653782	0.677996	STK38	ENSG00000112079	serine/threonine kinase 38 [Source:HGNC Symbol;Acc:17847]	36461669	36515247	0		-	3.12659	intron	opposite
703	D1	P	6	37888457	37888958	501	-	0.224656	0.239633	ZFAND3	ENSG00000156639	zinc finger, AN1-type domain 3 [Source:HGNC Symbol;Acc:18019]	37787275	38122400	0		+	0.247232	intron	opposite
709	D1	P	6	42604193	42604694	501	-	0.10484	0.119817	UBR2	ENSG00000024048	ubiquitin protein ligase E3 component n-recognin 2 [Source:HGNC Symbol;Acc:21289]	42531800	42661242	0		+	0.555975	intron	opposite
716	D1	P	6	53733533	53734034	501	-	0	0	LRRC1	ENSG00000137269	leucine rich repeat containing 1 [Source:HGNC Symbol;Acc:14307]	53659295	53788919	0		+	0.0120644	intron	opposite
722	D1	P	6	74136359	74137035	676	+	0.0111056	0.0111056	MB21D1	ENSG00000164430	Mab-21 domain containing 1 [Source:HGNC Symbol;Acc:21367]	74123238	74161999	0		-	0.0640087	intron	opposite
747	D1	P	6	125605760	125606372	612	+	0.0245302	0.0245302	HDDC2	ENSG00000111906	HD domain containing 2 [Source:HGNC Symbol;Acc:21078]	125596496	125623282	0		-	0.219209	intron	opposite
806	D1	P	7	28008669	28009283	614	+	0.0366756	0.0366756	JAZF1	ENSG00000153814	JAZF zinc finger 1 [Source:HGNC Symbol;Acc:28917]	27870192	28220362	0		-	0.0473434	intron	opposite
836	D1	P	7	76992893	76993394	501	+	0.0898625	0.10484	PION	ENSG00000186088	pigeon homolog (Drosophila) [Source:HGNC Symbol;Acc:28042]	76940068	77046115	0		-	0.39908	intron	opposite
843	D1	P	7	86549973	86550595	622	+	0.0482728	0.0482728	KIAA1324L	ENSG00000164659	KIAA1324-like [Source:HGNC Symbol;Acc:21945]	86506222	86689015	0		-	0.0468893	intron	opposite
860	D1	P	7	105918655	105919273	618	+	0.157901	0.145754	NAMPT	ENSG00000105835	nicotinamide phosphoribosyltransferase [Source:HGNC Symbol;Acc:30092]	105888731	105926772	0		-	0.383613	intron	opposite
868	D1	P	7	123344753	123345254	501	+	0.0748854	0.0748854	WASL	ENSG00000106299	Wiskott-Aldrich syndrome-like [Source:HGNC Symbol;Acc:12735]	123321989	123389121	0		-	0.158919	intron	opposite
875	D1	P	7	138938554	138939055	501	-	0.0149771	0	UBN2	ENSG00000157741	ubinuclein 2 [Source:HGNC Symbol;Acc:21931]	138915102	138992981	0		+	0.194913	intron	opposite
1004	D1	P	9	77697126	77697739	613	+	1.01634	1.0041	C9orf95	ENSG00000106733	chromosome 9 open reading frame 95 [Source:HGNC Symbol;Acc:26057]	77675489	77703133	0		-	1.34297	intron	opposite
1054	D1	P	9	140141125	140141747	622	+	0.0120682	0.0120682	FAM166A	ENSG00000188163	family with sequence similarity 166, member A [Source:HGNC Symbol;Acc:33818]	140138036	140142222	0		-	0.13288	intron	opposite
1060	D1	P	10	5824790	5825396	606	+	0.185795	0.148636	GDI2	ENSG00000057608	GDP dissociation inhibitor 2 [Source:HGNC Symbol;Acc:4227]	5807186	5884095	0		-	0.31204	intron	opposite
1107	D1	P	10	73939120	73939742	622	+	0.0724092	0.0844775	ASCC1	ENSG00000138303	activating signal cointegrator 1 complex subunit 1 [Source:HGNC Symbol;Acc:24268]	73856278	73980083	0		-	0.220321	intron	opposite
1109	D1	P	10	74791621	74792243	622	+	0.181023	0.168955	P4HA1	ENSG00000122884	prolyl 4-hydroxylase, alpha polypeptide I [Source:HGNC Symbol;Acc:8546]	74766975	74856732	0		-	0.125311	intron	opposite
1126	D1	P	10	103707754	103708376	622	+	0.120682	0.120682	C10orf76	ENSG00000120029	chromosome 10 open reading frame 76 [Source:HGNC Symbol;Acc:25788]	103605356	103815950	0		-	0.193715	intron	opposite
1134	D1	P	10	120465164	120465777	613	+	0.0734706	0.0857157	C10orf46	ENSG00000151893	chromosome 10 open reading frame 46 [Source:HGNC Symbol;Acc:23727]	120433679	120514761	0		-	0.323799	intron	opposite
1143	D1	P	10	131345259	131345760	501	-	0.0449312	0.0449312	MGMT	ENSG00000170430	O-6-methylguanine-DNA methyltransferase [Source:HGNC Symbol;Acc:7059]	131265448	131566271	0		+	0.05346	intron	opposite
1151	D1	P	11	3768076	3768577	501	+	0.748854	0.733877	NUP98	ENSG00000110713	nucleoporin 98kDa [Source:HGNC Symbol;Acc:8068]	3692313	3819022	0		-	0.660056	intron	opposite
1242	D1	P	11	75746711	75747212	501	-	0.149771	0.179725	UVRAG	ENSG00000198382	UV radiation resistance associated gene [Source:HGNC Symbol;Acc:12640]	75526212	75854239	0		+	0.110957	intron	opposite
1243	D1	P	11	76080754	76081372	618	+	0.145754	0.145754	PRKRIR	ENSG00000137492	protein-kinase, interferon-inducible double stranded RNA dependent inhibitor, repressor of (P58 repressor) [Source:HGNC Symbol;Acc:9440]	76061000	76092015	0		-	0.431	intron	opposite
1250	D1	P	11	84280274	84280775	501	+	0	0	DLG2	ENSG00000150672	discs, large homolog 2 (Drosophila) [Source:HGNC Symbol;Acc:2901]	83166055	85338966	0		-	0.0123975	intron	opposite
1257	D1	P	11	88399515	88400137	622	+	0	0	GRM5	ENSG00000168959	glutamate receptor, metabotropic 5 [Source:HGNC Symbol;Acc:4597]	88237744	88799113	0		-	0.000348	intron	opposite
1322	D1	P	12	50089936	50090548	612	+	0.0122651	0.0122651	FMNL3	ENSG00000161791	formin-like 3 [Source:HGNC Symbol;Acc:23698]	50031724	50101948	0		-	0.456409	intron	opposite
1380	D1	P	12	121249039	121249660	621	+	0.314278	0.314278	SPPL3	ENSG00000157837	Signal peptide peptidase-like 3 [Source:UniProtKB/Swiss-Prot;Acc:Q8TCT6]	121200313	121342174	0		-	0.4445	intron	opposite
1396	D1	P	13	31199920	31200421	501	-	0.449312	0.389404	USPL1	ENSG00000132952	ubiquitin specific peptidase like 1 [Source:HGNC Symbol;Acc:20294]	31191830	31233686	0		+	0.92039	intron	opposite
1410	D1	P	13	42892494	42892995	501	-	0.808762	0.793785	AKAP11	ENSG00000023516	A kinase (PRKA) anchor protein 11 [Source:HGNC Symbol;Acc:369]	42846289	42897396	0		+	0.745847	intron	opposite
1415	D1	P	13	50102093	50102594	501	-	0.629037	0.793785	PHF11	ENSG00000136147	PHD finger protein 11 [Source:HGNC Symbol;Acc:17024]	50069746	50103123	0		+	1.27155	intron	opposite
1458	D1	P	14	36778134	36778747	613	+	0.477559	0.538785	MBIP	ENSG00000151332	MAP3K12 binding inhibitory protein 1 [Source:HGNC Symbol;Acc:20427]	36767770	36789882	0		-	0.689527	intron	opposite
1464	D1	P	14	45574311	45574812	501	-	0.329496	0.314519	PRPF39	ENSG00000185246	PRP39 pre-mRNA processing factor 39 homolog (S. cerevisiae) [Source:HGNC Symbol;Acc:20314]	45553302	45585485	0		+	0.859917	intron	opposite
1517	D1	P	15	56479851	56480469	618	+	0.218631	0.25507	RFX7	ENSG00000181827	regulatory factor X, 7 [Source:HGNC Symbol;Acc:25777]	56379478	56535483	0		-	0.390657	intron	opposite
1518	D1	P	15	57017038	57017651	613	+	0.0122451	0.0244902	ZNF280D	ENSG00000137871	zinc finger protein 280D [Source:HGNC Symbol;Acc:25953]	56922379	57210769	0		-	0.092837	intron	opposite
1533	D1	P	15	79177904	79178405	501	-	0.913602	0.97351	MORF4L1	ENSG00000185787	mortality factor 4 like 1 [Source:HGNC Symbol;Acc:16989]	79102829	79190475	0		+	0.447179	intron	opposite
1565	D1	P	16	1880248	1880749	501	-	0.284565	0.329496	FAHD1	ENSG00000180185	fumarylacetoacetate hydrolase domain containing 1 [Source:HGNC Symbol;Acc:14169]	1876968	1890208	0		+	0.202711	intron	opposite
1584	D1	P	16	10556517	10557018	501	-	1.18319	1.28803	ATF7IP2	ENSG00000166669	activating transcription factor 7 interacting protein 2 [Source:HGNC Symbol;Acc:20397]	10479912	10577495	0		+	0.509816	intron	opposite
1617	D1	P	16	29811173	29811674	501	-	4.13367	4.26847	KIF22	ENSG00000079616	kinesin family member 22 [Source:HGNC Symbol;Acc:6391]	29802041	29816706	0		+	1.91525	intron	opposite
1656	D1	P	16	67835215	67835828	613	+	0.183677	0.183677	RANBP10	ENSG00000141084	RAN binding protein 10 [Source:HGNC Symbol;Acc:29285]	67757005	67840555	0		-	0.27464	intron	opposite
1699	D1	P	17	1001863	1002364	501	+	0.0149771	0.0898625	ABR	ENSG00000159842	active BCR-related gene [Source:HGNC Symbol;Acc:81]	906758	1090616	0		-	0.204709	intron	opposite
1700	D1	P	17	1001868	1002481	613	+	0.0244902	0.0734706	ABR	ENSG00000159842	active BCR-related gene [Source:HGNC Symbol;Acc:81]	906758	1090616	0		-	0.204709	intron	opposite
1707	D1	P	17	2404641	2405263	622	+	0.663752	0.699956	METTL16	ENSG00000127804	methyltransferase like 16 [Source:HGNC Symbol;Acc:28484]	2319352	2415200	0		-	0.520456	intron	opposite
1708	D1	P	17	3990839	3991340	501	+	0.0898625	0.0599083	ZZEF1	ENSG00000074755	zinc finger, ZZ-type with EF-hand domain 1 [Source:HGNC Symbol;Acc:29027]	3907739	4046314	0		-	0.691105	intron	opposite
1729	D1	P	17	17158345	17158846	501	+	0.269587	0.314519	COPS3	ENSG00000141030	COP9 constitutive photomorphogenic homolog subunit 3 (Arabidopsis) [Source:HGNC Symbol;Acc:2239]	17150134	17184607	0		-	0.404342	intron	opposite
1731	D1	P	17	19822115	19822616	501	+	0.149771	0.0299542	AKAP10	ENSG00000108599	A kinase (PRKA) anchor protein 10 [Source:HGNC Symbol;Acc:368]	19807788	19881150	0		-	0.49438	intron	opposite
1733	D1	P	17	27258128	27258751	623	+	0.325319	0.361466	PHF12	ENSG00000109118	PHD finger protein 12 [Source:HGNC Symbol;Acc:20816]	27232268	27278789	0		-	1.70112	intron	opposite
1744	D1	P	17	31021153	31021775	622	+	0	0	MYO1D	ENSG00000176658	myosin ID [Source:HGNC Symbol;Acc:7598]	30819628	31203902	0		-	0.0254742	intron	opposite
1752	D1	P	17	35664178	35664800	622	+	0.108614	0.13275	ACACA	ENSG00000132142	acetyl-CoA carboxylase alpha [Source:HGNC Symbol;Acc:84]	35441923	35766902	0		-	0.0984636	intron	opposite
1756	D1	P	17	37964281	37964895	614	+	0.0978016	0.0978016	IKZF3	ENSG00000161405	IKAROS family zinc finger 3 (Aiolos) [Source:HGNC Symbol;Acc:13178]	37913968	38020441	0		-	0.420079	intron	opposite
1770	D1	P	17	42556628	42557242	614	+	0.207828	0.244504	GPATCH8	ENSG00000186566	G patch domain containing 8 [Source:HGNC Symbol;Acc:29066]	42472652	42580802	0		-	0.878783	intron	opposite
1789	D1	P	17	57830552	57831053	501	-	0.569129	0.554152	VMP1	ENSG00000062716	vacuole membrane protein 1 [Source:HGNC Symbol;Acc:29559]	57784863	57917950	0		+	0.281898	intron	opposite
1796	D1	P	17	62513058	62513559	501	-	3.22007	3.17514	CEP95	ENSG00000258890	centrosomal protein 95kDa [Source:HGNC Symbol;Acc:25141]	62502255	62534060	0		+	3.11344	intron	opposite
1814	D1	P	17	74235234	74235735	501	+	0.149771	0.179725	RNF157	ENSG00000141576	ring finger protein 157 [Source:HGNC Symbol;Acc:29402]	74138534	74236390	0		-	0.788444	intron	opposite
1852	D1	P	17	80493885	80494386	501	-	0.314519	0.419358	FOXK2	ENSG00000141568	forkhead box K2 [Source:HGNC Symbol;Acc:6036]	80477589	80562483	0		+	0.415003	intron	opposite
1954	D1	P	19	9922433	9923047	614	+	0.440107	0.501233	FBXL12	ENSG00000127452	F-box and leucine-rich repeat protein 12 [Source:HGNC Symbol;Acc:13611]	9920947	9929731	0		-	1.26321	intron	opposite
1979	D1	P	19	17214927	17215428	501	-	1.54264	1.54264	MYO9B	ENSG00000099331	myosin IXB [Source:HGNC Symbol;Acc:7609]	17212466	17324103	0		+	0.863996	intron	opposite
1980	D1	P	19	17214928	17215429	501	-	1.54264	1.54264	MYO9B	ENSG00000099331	myosin IXB [Source:HGNC Symbol;Acc:7609]	17212466	17324103	0		+	0.863996	intron	opposite
1981	D1	P	19	17214930	17215431	501	-	1.54264	1.55762	MYO9B	ENSG00000099331	myosin IXB [Source:HGNC Symbol;Acc:7609]	17212466	17324103	0		+	0.863996	intron	opposite
1982	D1	P	19	17214931	17215432	501	-	1.54264	1.55762	MYO9B	ENSG00000099331	myosin IXB [Source:HGNC Symbol;Acc:7609]	17212466	17324103	0		+	0.863996	intron	opposite
2002	D1	P	19	37061053	37061675	622	+	0.374114	0.398251	ZNF529	ENSG00000186020	zinc finger protein 529 [Source:HGNC Symbol;Acc:29328]	37034518	37064197	0		-	0.986422	intron	opposite
2026	D1	P	19	46113361	46113862	501	+	0.0599083	0.0748854	EML2	ENSG00000125746	echinoderm microtubule associated protein like 2 [Source:HGNC Symbol;Acc:18035]	46112660	46148726	0		-	0.295803	intron	opposite
2028	D1	P	19	46131656	46132157	501	+	0.0599083	0.10484	EML2	ENSG00000125746	echinoderm microtubule associated protein like 2 [Source:HGNC Symbol;Acc:18035]	46112660	46148726	0		-	0.295803	intron	opposite
2039	D1	P	19	48189062	48189563	501	-	0.0898625	0.119817	GLTSCR1	ENSG00000063169	glioma tumor suppressor candidate region gene 1 [Source:HGNC Symbol;Acc:4332]	48111453	48206534	0		+	0.42178	intron	opposite
2052	D1	P	19	50286144	50286645	501	-	0.0599083	0.0599083	AP2A1	ENSG00000196961	adaptor-related protein complex 2, alpha 1 subunit [Source:HGNC Symbol;Acc:561]	50270180	50310369	0		+	0.445423	intron	opposite
2075	D1	P	19	56927813	56928314	501	-	0.0149771	0	ZNF583	ENSG00000198440	zinc finger protein 583 [Source:HGNC Symbol;Acc:26427]	56915383	56938733	0		+	0.0354175	intron	opposite
2215	D1	P	X	70759318	70759819	501	-	5.90097	5.91595	OGT	ENSG00000147162	O-linked N-acetylglucosamine (GlcNAc) transferase (UDP-N-acetylglucosamine:polypeptide-N-acetylglucosaminyl transferase) [Source:HGNC Symbol;Acc:8127]	70752933	70795747	0		+	4.57256	intron	opposite
40	D1	P	1	32723563	32724064	501	-	1.7673	2.02191	LCK	ENSG00000182866	lymphocyte-specific protein tyrosine kinase [Source:HGNC Symbol;Acc:6524]	32716840	32751766	0		+	2.36703	utr	opposite
41	D1	P	1	32723566	32724067	501	-	1.79725	2.02191	LCK	ENSG00000182866	lymphocyte-specific protein tyrosine kinase [Source:HGNC Symbol;Acc:6524]	32716840	32751766	0		+	2.36703	utr	opposite
92	D1	P	1	149951938	149952551	613	+	0.0612255	0.0367353	OTUD7B	ENSG00000163113	OTU domain containing 7B [Source:HGNC Symbol;Acc:16683]	149912231	149982686	0		-	0.0628533	utr	opposite
93	D1	P	1	149960624	149961244	620	+	0.0121071	0	OTUD7B	ENSG00000163113	OTU domain containing 7B [Source:HGNC Symbol;Acc:16683]	149912231	149982686	0		-	0.0628533	utr	opposite
134	D1	P	1	182251926	182252551	625	+	0	0	GS1-122H1.2	ENSG00000228918	No description	182098445	182283196	0		-	0.00516827	utr	opposite
369	D1	P	3	81925931	81926432	501	-	0	0	RP11-359D24.1	ENSG00000242009	No description	81889698	81972012	0		+	0.000457	utr	opposite
451	D1	P	4	36535297	36535798	501	+	0	0	RP11-722M1.1	ENSG00000248215	No description	36498159	36643522	0		-	0.000569	utr	opposite
504	D1	P	4	123090465	123090966	501	-	0.149771	0.149771	KIAA1109	ENSG00000138688	KIAA1109 [Source:HGNC Symbol;Acc:26953]	123073488	123283913	0		+	0.497217	utr	opposite
599	D1	P	5	104267074	104267575	501	+	0	0	RP11-6N13.1	ENSG00000251574	No description	103718999	104728671	0		-	0.000313	utr	opposite
848	D1	P	7	99531712	99532213	501	-	0.0149771	0.0149771	RP4-604G5.1	ENSG00000237640	No description	99527015	99546243	0		+	0.00899295	utr	opposite
870	D1	P	7	130776200	130776818	618	+	1.68832	1.65188	AC058791.2	ENSG00000231721	No description	130626519	130794935	0		-	1.31824	utr	opposite
933	D1	P	8	79436393	79437006	613	+	0.244902	0.220412	RP11-594N15.2	ENSG00000254266	No description	79338338	79470738	0		-	0.131857	utr	opposite
1028	D1	P	9	106144097	106144713	616	+	0	0	RP11-436F21.1	ENSG00000226566	No description	106124234	106192174	0		-	0.000221	utr	opposite
1059	D1	P	10	5739009	5739510	501	-	0.629037	0.688946	FAM208B	ENSG00000108021	family with sequence similarity 208, member B [Source:HGNC Symbol;Acc:23484]	5726801	5805703	0		+	0.808994	utr	opposite
1245	D1	P	11	76478345	76478959	614	+	0.0122252	0	RP11-21L23.4	ENSG00000254632	No description	76470960	76479267	0		-	0	utr	opposite
1306	D1	P	12	7506900	7507526	626	+	0	0	CD163L1	ENSG00000177675	CD163 molecule-like 1 [Source:HGNC Symbol;Acc:30375]	7499281	7632493	0		-	0.00761935	utr	opposite
1416	D1	P	13	51661109	51661610	501	+	0	0	LINC00371	ENSG00000226792	long intergenic non-protein coding RNA 371 [Source:HGNC Symbol;Acc:42693]	51659560	51685078	0		-	0.000589	utr	opposite
1451	D1	P	14	23224616	23225231	615	+	0.0122053	0.0122054	CTD-2555K7.2	ENSG00000258458	No description	23171820	23235771	0		-	0.00470259	utr	opposite
1461	D1	P	14	38536817	38537318	501	+	0	0	CTD-2058B24.2	ENSG00000259048	No description	38503492	38663486	0		-	0.000376	utr	opposite
1480	D1	P	14	73841321	73841822	501	+	0.0149771	0.0149771	NUMB	ENSG00000133961	numb homolog (Drosophila) [Source:HGNC Symbol;Acc:8060]	73741815	73930348	0		-	0.184	utr	opposite
1662	D1	P	16	70559872	70560373	501	-	0.509221	0.509221	SF3B3	ENSG00000189091	splicing factor 3b, subunit 3, 130kDa [Source:HGNC Symbol;Acc:10770]	70557691	70608820	0		+	0.882721	utr	opposite
1691	D1	P	16	89519619	89520241	622	+	0.712024	0.724093	ANKRD11	ENSG00000167522	ankyrin repeat domain 11 [Source:HGNC Symbol;Acc:21316]	89334035	89556969	0		-	1.19403	utr	opposite
1763	D1	P	17	40420619	40421120	501	+	1.13826	1.15324	STAT5B	ENSG00000173757	signal transducer and activator of transcription 5B [Source:HGNC Symbol;Acc:11367]	40351186	40428725	0		-	1.02296	utr	opposite
1774	D1	P	17	43233363	43233982	619	+	1.97664	2.07365	AC002117.1	ENSG00000224505	No description	43227985	43236822	0		-	1.21565	utr	opposite
2056	D1	P	19	50897485	50897986	501	-	0.0449312	0.0299542	POLD1	ENSG00000062822	polymerase (DNA directed), delta 1, catalytic subunit 125kDa [Source:HGNC Symbol;Acc:9175]	50887593	50921270	0		+	0.224586	utr	opposite
522	D1	P	4	154264478	154264979	501	-	0.0149771	0	MND1	ENSG00000121211	meiotic nuclear divisions 1 homolog (S. cerevisiae) [Source:HGNC Symbol;Acc:24839]	154265801	154336270	822		+	0.0214448	NA	opposite
1985	D1	P	19	18198537	18199164	627	+	0.0119721	0.0119721	IL12RB1	ENSG00000096996	interleukin 12 receptor, beta 1 [Source:HGNC Symbol;Acc:5971]	18170371	18197697	840		-	0.323829	NA	opposite
579	D1	P	5	73833911	73834412	501	+	0	0	CTC-419K13.1	ENSG00000248673	No description	73665201	73832801	1110		-	0.000449	NA	opposite
562	D1	P	5	36726472	36726973	501	+	0	0	CTD-2353F22.1	ENSG00000250155	No description	36666316	36725297	1175		-	0.0178459	NA	opposite
1849	D1	P	17	80252044	80252663	619	+	1.94026	2.07365	AC132872.2	ENSG00000244773	No description	80247922	80250690	1354		-	0.22265	NA	opposite
1196	D1	P	11	65263150	65263651	501	-	0.0149771	0.0299542	MALAT1	ENSG00000251562	metastasis associated lung adenocarcinoma transcript 1 (non-protein coding) [Source:HGNC Symbol;Acc:29665]	65265233	65273940	1582		+	19.8979	NA	opposite
3	D1	P	1	981326	981944	618	+	0.522286	0.51014	AGRN	ENSG00000188157	agrin [Source:HGNC Symbol;Acc:329]	955503	991496	0		+	0.126373	exon	same
61	D1	P	1	54284508	54285009	501	-	0.629037	0.629037	TMEM48	ENSG00000058804	transmembrane protein 48 [Source:HGNC Symbol;Acc:25525]	54231133	54304533	0		-	0.211007	exon	same
207	D1	P	2	37259313	37259814	501	-	0.778808	0.943556	HEATR5B	ENSG00000008869	HEAT repeat containing 5B [Source:HGNC Symbol;Acc:29273]	37195526	37311485	0		-	0.43136	exon	same
380	D1	P	3	111319402	111320018	616	+	2.7052	2.83924	CD96	ENSG00000153283	CD96 molecule [Source:HGNC Symbol;Acc:16892]	111260926	111384597	0		+	1.62702	exon	same
403	D1	P	3	142763441	142764063	622	+	0.615479	0.494797	U2SURP	ENSG00000163714	U2 snRNP-associated SURP domain containing [Source:HGNC Symbol;Acc:30855]	142720010	142779567	0		+	1.07668	exon	same
511	D1	P	4	140282660	140283282	622	+	1.78609	1.54473	NAA15	ENSG00000164134	N(alpha)-acetyltransferase 15, NatA auxiliary subunit [Source:HGNC Symbol;Acc:30782]	140222609	140341187	0		+	0.373645	exon	same
1041	D1	P	9	131284836	131285458	622	+	1.3275	1.31543	GLE1	ENSG00000119392	GLE1 RNA export mediator homolog (yeast) [Source:HGNC Symbol;Acc:4315]	131266979	131304567	0		+	0.571053	exon	same
1232	D1	P	11	70347502	70348003	501	-	0	0	SHANK2	ENSG00000162105	SH3 and multiple ankyrin repeat domains 2 [Source:HGNC Symbol;Acc:14295]	70313961	70963623	0		-	0.000648	exon	same
1233	D1	P	11	70347503	70348004	501	-	0	0	SHANK2	ENSG00000162105	SH3 and multiple ankyrin repeat domains 2 [Source:HGNC Symbol;Acc:14295]	70313961	70963623	0		-	0.000648	exon	same
1614	D1	P	16	29811053	29811746	693	+	4.14926	4.11675	KIF22	ENSG00000079616	kinesin family member 22 [Source:HGNC Symbol;Acc:6391]	29802041	29816706	0		+	1.91525	exon	same
1618	D1	P	16	30092500	30093165	665	+	1.04988	0.959568	PPP4C	ENSG00000149923	protein phosphatase 4, catalytic subunit [Source:HGNC Symbol;Acc:9319]	30087311	30096698	0		+	1.71945	exon	same
1629	D1	P	16	30735498	30735999	501	+	9.55538	9.28579	SRCAP	ENSG00000080603	Snf2-related CREBBP activator protein [Source:HGNC Symbol;Acc:16974]	30709530	30762702	0		+	1.54448	exon	same
1630	D1	P	16	30735501	30736002	501	+	9.57035	9.28579	SRCAP	ENSG00000080603	Snf2-related CREBBP activator protein [Source:HGNC Symbol;Acc:16974]	30709530	30762702	0		+	1.54448	exon	same
1631	D1	P	16	30735503	30736116	613	+	9.02464	9.08587	SRCAP	ENSG00000080603	Snf2-related CREBBP activator protein [Source:HGNC Symbol;Acc:16974]	30709530	30762702	0		+	1.54448	exon	same
1718	D1	P	17	7473201	7473823	622	+	2.38951	2.29296	SENP3	ENSG00000161956	SUMO1/sentrin/SMT3 specific peptidase 3 [Source:HGNC Symbol;Acc:17862]	7465272	7475287	0		+	1.31438	exon	same
1957	D1	P	19	10475788	10476289	501	-	2.59104	2.41131	TYK2	ENSG00000105397	tyrosine kinase 2 [Source:HGNC Symbol;Acc:12440]	10461209	10491352	0		-	1.34936	exon	same
2008	D1	P	19	40885712	40886334	622	+	0.0482728	0.0603411	PLD3	ENSG00000105223	phospholipase D family, member 3 [Source:HGNC Symbol;Acc:17158]	40854491	40886346	0		+	0.872784	exon	same
2009	D1	P	19	41238802	41239415	613	+	0.0979608	0.0244902	ITPKC	ENSG00000086544	inositol-trisphosphate 3-kinase C [Source:HGNC Symbol;Acc:14897]	41223008	41246763	0		+	0.0462073	exon	same
2092	D1	P	20	31423905	31424518	613	+	1.54288	1.37145	MAPRE1	ENSG00000101367	microtubule-associated protein, RP/EB family, member 1 [Source:HGNC Symbol;Acc:6890]	31407699	31438211	0		+	0.766806	exon	same
9	D1	P	1	8587167	8587668	501	-	0.0599083	0.0449312	RERE	ENSG00000142599	arginine-glutamic acid dipeptide (RE) repeats [Source:HGNC Symbol;Acc:9965]	8412457	8877702	0		-	0.266919	intron	same
43	D1	P	1	35785836	35786449	613	+	0.0122451	0.0122451	ZMYM4	ENSG00000146463	zinc finger, MYM-type 4 [Source:HGNC Symbol;Acc:13055]	35734568	35887659	0		+	0.286562	intron	same
47	D1	P	1	36749810	36750311	501	+	0.224656	0.209679	THRAP3	ENSG00000054118	thyroid hormone receptor associated protein 3 [Source:HGNC Symbol;Acc:22964]	36690017	36770958	0		+	0.683744	intron	same
94	D1	P	1	150051278	150051900	622	+	0	0.0120682	VPS45	ENSG00000136631	vacuolar protein sorting 45 homolog (S. cerevisiae) [Source:HGNC Symbol;Acc:14579]	150039369	150117505	0		+	0.224967	intron	same
186	D1	P	2	20885929	20886430	501	-	1.88711	1.61752	C2orf43	ENSG00000118961	chromosome 2 open reading frame 43 [Source:HGNC Symbol;Acc:26145]	20883803	21022882	0		-	0.0768175	intron	same
204	D1	P	2	28155370	28155996	626	+	0.203851	0.167877	MRPL33	ENSG00000243147	mitochondrial ribosomal protein L33 [Source:HGNC Symbol;Acc:14487]	27994584	28210954	0		+	0.0699828	intron	same
251	D1	P	2	138327994	138328495	501	+	0	0	THSD7B	ENSG00000144229	thrombospondin, type I, domain containing 7B [Source:HGNC Symbol;Acc:29348]	137523115	138435287	0		+	0.000462	intron	same
285	D1	P	2	204245886	204246499	613	+	0.0244902	0.0367353	ABI2	ENSG00000138443	abl-interactor 2 [Source:HGNC Symbol;Acc:24011]	204192942	204301606	0		+	0.177056	intron	same
312	D1	P	2	234244707	234245322	615	+	0	0.0122054	SAG	ENSG00000130561	S-antigen; retina and pineal gland (arrestin) [Source:HGNC Symbol;Acc:10521]	234216309	234255701	0		+	0.00419889	intron	same
317	D1	P	3	3137561	3138062	501	-	0.0149771	0.0149771	IL5RA	ENSG00000091181	interleukin 5 receptor, alpha [Source:HGNC Symbol;Acc:6017]	3111233	3168297	0		-	0.00289857	intron	same
374	D1	P	3	101021031	101021532	501	-	0	0.0149771	IMPG2	ENSG00000081148	interphotoreceptor matrix proteoglycan 2 [Source:HGNC Symbol;Acc:18362]	100945570	101039404	0		-	0.0279635	intron	same
388	D1	P	3	122306196	122306697	501	+	0.0149771	0.0149771	PARP15	ENSG00000173200	poly (ADP-ribose) polymerase family, member 15 [Source:HGNC Symbol;Acc:26876]	122296449	122357894	0		+	0.734768	intron	same
389	D1	P	3	122306201	122306702	501	+	0.0149771	0.0149771	PARP15	ENSG00000173200	poly (ADP-ribose) polymerase family, member 15 [Source:HGNC Symbol;Acc:26876]	122296449	122357894	0		+	0.734768	intron	same
390	D1	P	3	122306201	122306814	613	+	0.0244902	0.0244902	PARP15	ENSG00000173200	poly (ADP-ribose) polymerase family, member 15 [Source:HGNC Symbol;Acc:26876]	122296449	122357894	0		+	0.734768	intron	same
414	D1	P	3	171864871	171865493	622	+	0.0241364	0.0482728	FNDC3B	ENSG00000075420	fibronectin type III domain containing 3B [Source:HGNC Symbol;Acc:24670]	171757418	172119455	0		+	0.100513	intron	same
425	D1	P	3	195055259	195055760	501	-	0.0449312	0.0449312	ACAP2	ENSG00000114331	ArfGAP with coiled-coil, ankyrin repeat and PH domains 2 [Source:HGNC Symbol;Acc:16469]	194995465	195163807	0		-	0.342377	intron	same
462	D1	P	4	68430001	68430619	618	+	0	0	STAP1	ENSG00000035720	signal transducing adaptor family member 1 [Source:HGNC Symbol;Acc:24133]	68424446	68473055	0		+	0.069756	intron	same
490	D1	P	4	108864906	108865407	501	-	0.164748	0.119817	RP11-286E11.1	ENSG00000245293	No description	108784635	108899955	0		-	0.0440074	intron	same
559	D1	P	5	31537142	31537643	501	+	0.224656	0.25461	C5orf22	ENSG00000082213	chromosome 5 open reading frame 22 [Source:HGNC Symbol;Acc:25639]	31532373	31555165	0		+	0.345693	intron	same
570	D1	P	5	50016803	50017416	613	+	0.0367353	0.0244902	PARP8	ENSG00000151883	poly (ADP-ribose) polymerase family, member 8 [Source:HGNC Symbol;Acc:26124]	49961733	50142356	0		+	0.346654	intron	same
609	D1	P	5	125798475	125799097	622	+	0.253432	0.241364	GRAMD3	ENSG00000155324	GRAM domain containing 3 [Source:HGNC Symbol;Acc:24911]	125695824	125832186	0		+	0.160225	intron	same
630	D1	P	5	153006232	153006845	613	+	0	0	GRIA1	ENSG00000155511	glutamate receptor, ionotropic, AMPA 1 [Source:HGNC Symbol;Acc:4571]	152869175	153193240	0		+	0.000325	intron	same
652	D1	P	5	179144404	179145024	620	+	0.0242142	0.0242142	CANX	ENSG00000127022	calnexin [Source:HGNC Symbol;Acc:1473]	179105629	179157926	0		+	0.604522	intron	same
677	D1	P	6	30589237	30589890	653	+	0.24142	0.24142	MRPS18B	ENSG00000204568	mitochondrial ribosomal protein S18B [Source:HGNC Symbol;Acc:14516]	30585486	30594172	0		+	0.569491	intron	same
678	D1	P	6	30589272	30589773	501	+	0.25461	0.269587	MRPS18B	ENSG00000204568	mitochondrial ribosomal protein S18B [Source:HGNC Symbol;Acc:14516]	30585486	30594172	0		+	0.569491	intron	same
679	D1	P	6	30589276	30589777	501	+	0.25461	0.25461	MRPS18B	ENSG00000204568	mitochondrial ribosomal protein S18B [Source:HGNC Symbol;Acc:14516]	30585486	30594172	0		+	0.569491	intron	same
687	D1	P	6	31662433	31662934	501	-	0.0748854	0.0449312	ABHD16A	ENSG00000204427	abhydrolase domain containing 16A [Source:HGNC Symbol;Acc:13921]	31654726	31671221	0		-	0.56334	intron	same
723	D1	P	6	74136472	74136973	501	-	0.0149771	0.0149771	MB21D1	ENSG00000164430	Mab-21 domain containing 1 [Source:HGNC Symbol;Acc:21367]	74123238	74161999	0		-	0.0640087	intron	same
724	D1	P	6	74136474	74136975	501	-	0.0149771	0.0149771	MB21D1	ENSG00000164430	Mab-21 domain containing 1 [Source:HGNC Symbol;Acc:21367]	74123238	74161999	0		-	0.0640087	intron	same
726	D1	P	6	82892439	82892940	501	-	0.808762	0.853694	IBTK	ENSG00000005700	inhibitor of Bruton agammaglobulinemia tyrosine kinase [Source:HGNC Symbol;Acc:17853]	82879700	82957471	0		-	0.279967	intron	same
769	D1	P	6	159087754	159088367	613	+	5.76744	5.7552	SYTL3	ENSG00000164674	synaptotagmin-like 3 [Source:HGNC Symbol;Acc:15587]	159071046	159185908	0		+	1.38479	intron	same
791	D1	P	7	11117302	11117916	614	+	0.244504	0.244504	PHF14	ENSG00000106443	PHD finger protein 14 [Source:HGNC Symbol;Acc:22203]	11013499	11209250	0		+	0.172415	intron	same
820	D1	P	7	50437235	50437736	501	+	3.68436	5.0323	IKZF1	ENSG00000185811	IKAROS family zinc finger 1 (Ikaros) [Source:HGNC Symbol;Acc:13176]	50343720	50472799	0		+	2.05745	intron	same
922	D1	P	8	38686817	38687431	614	+	1.27142	1.14917	TACC1	ENSG00000147526	transforming, acidic coiled-coil containing protein 1 [Source:HGNC Symbol;Acc:11522]	38585704	38710546	0		+	0.472936	intron	same
976	D1	P	8	145263946	145264559	613	+	0.171431	0.110206	HEATR7A	ENSG00000179832	HEAT repeat containing 7A [Source:HGNC Symbol;Acc:26958]	145202919	145316843	0		+	0.181091	intron	same
1006	D1	P	9	82192347	82192969	622	+	0.144818	0.13275	TLE4	ENSG00000106829	transducin-like enhancer of split 4 (E(sp1) homolog, Drosophila) [Source:HGNC Symbol;Acc:11840]	82186688	82341658	0		+	0.384485	intron	same
1055	D1	P	9	140528279	140528780	501	+	0.209679	0.25461	EHMT1	ENSG00000181090	euchromatic histone-lysine N-methyltransferase 1 [Source:HGNC Symbol;Acc:24650]	140513444	140764468	0		+	0.403832	intron	same
1068	D1	P	10	7352464	7352965	501	-	0.119817	0.0898625	SFMBT2	ENSG00000198879	Scm-like with four mbt domains 2 [Source:HGNC Symbol;Acc:20256]	7200586	7453450	0		-	0.528746	intron	same
1078	D1	P	10	28840764	28841265	501	+	0.524198	0.479267	WAC	ENSG00000095787	WW domain containing adaptor with coiled-coil [Source:HGNC Symbol;Acc:17327]	28821422	28909928	0		+	1.0486	intron	same
1096	D1	P	10	63184748	63185249	501	-	0	0	TMEM26	ENSG00000196932	transmembrane protein 26 [Source:HGNC Symbol;Acc:28550]	63166401	63213208	0		-	0.000321	intron	same
1192	D1	P	11	64963768	64964269	501	+	0.134794	0.0599083	CAPN1	ENSG00000014216	calpain 1, (mu/I) large subunit [Source:HGNC Symbol;Acc:1476]	64948037	64979477	0		+	0.572	intron	same
1199	D1	P	11	65737437	65737938	501	+	0.838716	0.943556	SART1	ENSG00000175467	squamous cell carcinoma antigen recognized by T cells [Source:HGNC Symbol;Acc:10538]	65729160	65747299	0		+	1.23471	intron	same
1200	D1	P	11	65828611	65829224	613	+	2.62045	2.64494	SF3B2	ENSG00000087365	splicing factor 3b, subunit 2, 145kDa [Source:HGNC Symbol;Acc:10769]	65818200	65836779	0		+	2.18392	intron	same
1202	D1	P	11	65849341	65849954	613	+	0.636745	0.57552	PACS1	ENSG00000175115	phosphofurin acidic cluster sorting protein 1 [Source:HGNC Symbol;Acc:30032]	65837834	66012218	0		+	1.23126	intron	same
1203	D1	P	11	65851774	65852275	501	+	0.703923	0.748854	PACS1	ENSG00000175115	phosphofurin acidic cluster sorting protein 1 [Source:HGNC Symbol;Acc:30032]	65837834	66012218	0		+	1.23126	intron	same
1204	D1	P	11	65854799	65855300	501	+	0.883648	0.823739	PACS1	ENSG00000175115	phosphofurin acidic cluster sorting protein 1 [Source:HGNC Symbol;Acc:30032]	65837834	66012218	0		+	1.23126	intron	same
1206	D1	P	11	65877764	65878396	632	+	1.50845	1.29465	PACS1	ENSG00000175115	phosphofurin acidic cluster sorting protein 1 [Source:HGNC Symbol;Acc:30032]	65837834	66012218	0		+	1.23126	intron	same
1207	D1	P	11	65882169	65882670	501	+	1.49771	1.34794	PACS1	ENSG00000175115	phosphofurin acidic cluster sorting protein 1 [Source:HGNC Symbol;Acc:30032]	65837834	66012218	0		+	1.23126	intron	same
1208	D1	P	11	65900003	65900609	606	+	0.966133	0.84227	PACS1	ENSG00000175115	phosphofurin acidic cluster sorting protein 1 [Source:HGNC Symbol;Acc:30032]	65837834	66012218	0		+	1.23126	intron	same
1210	D1	P	11	65928114	65928728	614	+	0.525683	0.550134	PACS1	ENSG00000175115	phosphofurin acidic cluster sorting protein 1 [Source:HGNC Symbol;Acc:30032]	65837834	66012218	0		+	1.23126	intron	same
1211	D1	P	11	65958932	65959554	622	+	0.615479	0.543069	PACS1	ENSG00000175115	phosphofurin acidic cluster sorting protein 1 [Source:HGNC Symbol;Acc:30032]	65837834	66012218	0		+	1.23126	intron	same
1221	D1	P	11	66954110	66954723	613	+	0.563275	0.587765	KDM2A	ENSG00000173120	lysine (K)-specific demethylase 2A [Source:HGNC Symbol;Acc:13606]	66886740	67025141	0		+	0.885583	intron	same
1222	D1	P	11	66978286	66978787	501	+	0.404381	0.434335	KDM2A	ENSG00000173120	lysine (K)-specific demethylase 2A [Source:HGNC Symbol;Acc:13606]	66886740	67025141	0		+	0.885583	intron	same
1241	D1	P	11	74481642	74482255	613	+	0.183677	0.122451	RNF169	ENSG00000166439	ring finger protein 169 [Source:HGNC Symbol;Acc:26961]	74459913	74553458	0		+	0.714589	intron	same
1251	D1	P	11	87030632	87031133	501	+	0.0299542	0.0299542	TMEM135	ENSG00000166575	transmembrane protein 135 [Source:HGNC Symbol;Acc:26167]	86748886	87034756	0		+	0.0557566	intron	same
1295	D1	P	12	486145	486646	501	-	0.284565	0.299542	KDM5A	ENSG00000073614	lysine (K)-specific demethylase 5A [Source:HGNC Symbol;Acc:9886]	389223	498620	0		-	0.603209	intron	same
1296	D1	P	12	896850	897463	613	+	0.0979608	0.159186	WNK1	ENSG00000060237	WNK lysine deficient protein kinase 1 [Source:HGNC Symbol;Acc:14540]	861759	1020618	0		+	0.657714	intron	same
1298	D1	P	12	1537247	1537868	621	+	0.0604381	0.0604381	ERC1	ENSG00000082805	ELKS/RAB6-interacting/CAST family member 1 [Source:HGNC Symbol;Acc:17072]	1099675	1605090	0		+	0.154843	intron	same
1325	D1	P	12	50901765	50902387	622	+	0.398251	0.33791	DIP2B	ENSG00000066084	DIP2 disco-interacting protein 2 homolog B (Drosophila) [Source:HGNC Symbol;Acc:29284]	50898768	51142450	0		+	0.444323	intron	same
1327	D1	P	12	51051324	51051825	501	+	0.149771	0.179725	DIP2B	ENSG00000066084	DIP2 disco-interacting protein 2 homolog B (Drosophila) [Source:HGNC Symbol;Acc:29284]	50898768	51142450	0		+	0.444323	intron	same
1338	D1	P	12	65587784	65588398	614	+	0.134477	0.134477	LEMD3	ENSG00000174106	LEM domain containing 3 [Source:HGNC Symbol;Acc:28887]	65563351	65642107	0		+	0.41718	intron	same
1385	D1	P	12	129696200	129696701	501	-	0	0	TMEM132D	ENSG00000151952	transmembrane protein 132D [Source:HGNC Symbol;Acc:29411]	129556270	130388211	0		-	0.000488	intron	same
1390	D1	P	13	20287314	20287815	501	-	0.793785	0.688946	PSPC1	ENSG00000121390	paraspeckle component 1 [Source:HGNC Symbol;Acc:20320]	20248896	20357142	0		-	0.39639	intron	same
1412	D1	P	13	46540454	46540955	501	-	0.0299542	0.0299542	ZC3H13	ENSG00000123200	zinc finger CCCH-type containing 13 [Source:HGNC Symbol;Acc:20368]	46528600	46626894	0		-	0.351314	intron	same
1420	D1	P	13	73371401	73372023	622	+	0	0	PIBF1	ENSG00000083535	progesterone immunomodulatory binding factor 1 [Source:HGNC Symbol;Acc:23352]	73356197	73590592	0		+	0.1956	intron	same
1453	D1	P	14	23970802	23971419	617	+	0.0851609	0.0729951	NGDN	ENSG00000129460	neuroguidin, EIF4E binding protein [Source:HGNC Symbol;Acc:20271]	23938897	23979071	0		+	0.589128	intron	same
1492	D1	P	14	93788185	93788686	501	-	0.449312	0.449312	BTBD7	ENSG00000011114	BTB (POZ) domain containing 7 [Source:HGNC Symbol;Acc:18269]	93703896	93799438	0		-	0.227263	intron	same
1496	D1	P	14	97011385	97012007	622	+	0.47066	0.555138	PAPOLA	ENSG00000090060	poly(A) polymerase alpha [Source:HGNC Symbol;Acc:14981]	96967770	97033448	0		+	0.845157	intron	same
1509	D1	P	15	43782438	43782939	501	-	0.10484	0.119817	TP53BP1	ENSG00000067369	tumor protein p53 binding protein 1 [Source:HGNC Symbol;Acc:11999]	43699407	43802926	0		-	0.212148	intron	same
1521	D1	P	15	60921883	60922505	622	+	0.398251	0.349978	RP11-219B17.1	ENSG00000245534	No description	60771377	60922836	0		+	0.884537	intron	same
1530	D1	P	15	76578197	76578698	501	-	0	0	ETFA	ENSG00000140374	electron-transfer-flavoprotein, alpha polypeptide [Source:HGNC Symbol;Acc:3481]	76507696	76603813	0		-	0.177328	intron	same
1532	D1	P	15	78747522	78748023	501	+	0.374427	0.46429	IREB2	ENSG00000136381	iron-responsive element binding protein 2 [Source:HGNC Symbol;Acc:6115]	78729773	78793798	0		+	1.0329	intron	same
1606	D1	P	16	21247017	21247518	501	+	0	0	ANKS4B	ENSG00000175311	ankyrin repeat and sterile alpha motif domain containing 4B [Source:HGNC Symbol;Acc:26795]	21245016	21263750	0		+	0.00240784	intron	same
1607	D1	P	16	21247018	21247631	613	+	0	0	ANKS4B	ENSG00000175311	ankyrin repeat and sterile alpha motif domain containing 4B [Source:HGNC Symbol;Acc:26795]	21245016	21263750	0		+	0.00240784	intron	same
1639	D1	P	16	47561420	47562042	622	+	0.0362046	0.0362046	PHKB	ENSG00000102893	phosphorylase kinase, beta [Source:HGNC Symbol;Acc:8927]	47495210	47735434	0		+	0.157052	intron	same
1663	D1	P	16	78474766	78475379	613	+	0.134696	0.122451	WWOX	ENSG00000186153	WW domain containing oxidoreductase [Source:HGNC Symbol;Acc:12799]	78133551	79246031	0		+	0.106018	intron	same
1664	D1	P	16	78953398	78954020	622	+	0.144818	0.0965457	WWOX	ENSG00000186153	WW domain containing oxidoreductase [Source:HGNC Symbol;Acc:12799]	78133551	79246031	0		+	0.106018	intron	same
1698	D1	P	16	89955023	89955524	501	+	0.539175	0.7189	TCF25	ENSG00000141002	transcription factor 25 (basic helix-loop-helix) [Source:HGNC Symbol;Acc:29181]	89939970	89977792	0		+	2.15141	intron	same
1727	D1	P	17	16090578	16091079	501	-	0.0149771	0.0299542	NCOR1	ENSG00000141027	nuclear receptor corepressor 1 [Source:HGNC Symbol;Acc:7672]	15934718	16119010	0		-	0.611457	intron	same
1732	D1	P	17	26963230	26963731	501	-	0.61406	0.599083	KIAA0100	ENSG00000007202	KIAA0100 [Source:HGNC Symbol;Acc:28960]	26941459	26972472	0		-	1.87271	intron	same
1734	D1	P	17	27258246	27258747	501	-	0.374427	0.25461	PHF12	ENSG00000109118	PHD finger protein 12 [Source:HGNC Symbol;Acc:20816]	27232268	27278789	0		-	1.70112	intron	same
1745	D1	P	17	31021270	31021771	501	-	0	0	MYO1D	ENSG00000176658	myosin ID [Source:HGNC Symbol;Acc:7598]	30819628	31203902	0		-	0.0254742	intron	same
1749	D1	P	17	34940452	34941074	622	+	1.90678	1.8585	GGNBP2	ENSG00000005955	gametogenetin binding protein 2 [Source:HGNC Symbol;Acc:19357]	34900773	34946278	0		+	1.49722	intron	same
1753	D1	P	17	35664296	35664797	501	-	0.134794	0.10484	ACACA	ENSG00000132142	acetyl-CoA carboxylase alpha [Source:HGNC Symbol;Acc:84]	35441923	35766902	0		-	0.0984636	intron	same
1754	D1	P	17	35664297	35664798	501	-	0.134794	0.10484	ACACA	ENSG00000132142	acetyl-CoA carboxylase alpha [Source:HGNC Symbol;Acc:84]	35441923	35766902	0		-	0.0984636	intron	same
1760	D1	P	17	38953464	38953965	501	-	0	0	KRT28	ENSG00000173908	keratin 28 [Source:HGNC Symbol;Acc:30842]	38948064	38956211	0		-	0	intron	same
1780	D1	P	17	47889206	47889819	613	+	0.257147	0.293882	KAT7	ENSG00000136504	K(lysine) acetyltransferase 7 [Source:HGNC Symbol;Acc:17016]	47865917	47906458	0		+	0.706934	intron	same
1787	D1	P	17	56467956	56468457	501	-	0.509221	0.509221	RNF43	ENSG00000108375	ring finger protein 43 [Source:HGNC Symbol;Acc:18505]	56429861	56494480	0		-	0.871108	intron	same
1815	D1	P	17	74742494	74742995	501	+	0.404381	0.419358	MFSD11	ENSG00000092931	major facilitator superfamily domain containing 11 [Source:HGNC Symbol;Acc:25458]	74733783	74775336	0		+	0.434963	intron	same
1816	D1	P	17	74742499	74743112	613	+	0.355108	0.367353	MFSD11	ENSG00000092931	major facilitator superfamily domain containing 11 [Source:HGNC Symbol;Acc:25458]	74733783	74775336	0		+	0.434963	intron	same
1824	D1	P	17	76148198	76148817	619	+	0	0	C17orf99	ENSG00000187997	chromosome 17 open reading frame 99 [Source:HGNC Symbol;Acc:34490]	76142434	76162258	0		+	0.00758486	intron	same
1833	D1	P	17	78687967	78688468	501	+	0.0449312	0.0449312	RPTOR	ENSG00000141564	regulatory associated protein of MTOR, complex 1 [Source:HGNC Symbol;Acc:30287]	78518619	78940173	0		+	0.168257	intron	same
1837	D1	P	17	78793202	78793824	622	+	0.060341	0.0603411	RPTOR	ENSG00000141564	regulatory associated protein of MTOR, complex 1 [Source:HGNC Symbol;Acc:30287]	78518619	78940173	0		+	0.168257	intron	same
1850	D1	P	17	80378907	80379408	501	+	1.31798	1.2431	HEXDC	ENSG00000169660	hexosaminidase (glycosyl hydrolase family 20, catalytic domain) containing [Source:HGNC Symbol;Acc:26307]	80376252	80400515	0		+	1.14804	intron	same
1885	D1	P	18	43968753	43969254	501	+	0	0	RNF165	ENSG00000141622	ring finger protein 165 [Source:HGNC Symbol;Acc:31696]	43914187	44040783	0		+	0.00433541	intron	same
1894	D1	P	18	67828022	67828523	501	-	0.0449312	0.0599083	RTTN	ENSG00000176225	rotatin [Source:HGNC Symbol;Acc:18654]	67671045	67872962	0		-	0.150617	intron	same
1909	D1	P	19	1092276	1092777	501	-	0.404381	0.344473	POLR2E	ENSG00000099817	polymerase (RNA) II (DNA directed) polypeptide E, 25kDa [Source:HGNC Symbol;Acc:9192]	1086578	1095391	0		-	1.43307	intron	same
1948	D1	P	19	8463762	8464263	501	+	0.539175	0.688946	RAB11B	ENSG00000185236	RAB11B, member RAS oncogene family [Source:HGNC Symbol;Acc:9761]	8455205	8469313	0		+	1.46757	intron	same
1959	D1	P	19	10725285	10725898	613	+	0.60001	0.710216	SLC44A2	ENSG00000129353	solute carrier family 44, member 2 [Source:HGNC Symbol;Acc:17292]	10713121	10755235	0		+	1.82022	intron	same
1969	D1	P	19	12588367	12588868	501	-	0.224656	0.269587	ZNF709	ENSG00000242852	zinc finger protein 709 [Source:HGNC Symbol;Acc:20629]	12571998	12624668	0		-	0.242951	intron	same
1978	D1	P	19	17214810	17215435	625	+	1.3932	1.3932	MYO9B	ENSG00000099331	myosin IXB [Source:HGNC Symbol;Acc:7609]	17212466	17324103	0		+	0.863996	intron	same
1983	D1	P	19	17257094	17257595	501	+	0.404381	0.419358	MYO9B	ENSG00000099331	myosin IXB [Source:HGNC Symbol;Acc:7609]	17212466	17324103	0		+	0.863996	intron	same
2001	D1	P	19	36384976	36385477	501	-	0.149771	0.134794	NFKBID	ENSG00000167604	nuclear factor of kappa light polypeptide gene enhancer in B-cells inhibitor, delta [Source:HGNC Symbol;Acc:15671]	36379143	36393185	0		-	0.248421	intron	same
2013	D1	P	19	42366895	42367508	613	+	1.55513	1.56737	RPS19	ENSG00000105372	ribosomal protein S19 [Source:HGNC Symbol;Acc:10402]	42363988	42375482	0		+	1.85166	intron	same
2021	D1	P	19	45508156	45508777	621	+	1.06371	0.870308	RELB	ENSG00000104856	v-rel reticuloendotheliosis viral oncogene homolog B [Source:HGNC Symbol;Acc:9956]	45504695	45541452	0		+	0.527919	intron	same
2038	D1	P	19	47648440	47649054	614	+	0	0.0366756	SAE1	ENSG00000142230	SUMO1 activating enzyme subunit 1 [Source:HGNC Symbol;Acc:30660]	47634080	47713892	0		+	0.171729	intron	same
2051	D1	P	19	50280558	50281059	501	+	0.10484	0.10484	AP2A1	ENSG00000196961	adaptor-related protein complex 2, alpha 1 subunit [Source:HGNC Symbol;Acc:561]	50270180	50310369	0		+	0.445423	intron	same
2053	D1	P	19	50341138	50341639	501	+	0.149771	0.239633	MED25	ENSG00000104973	mediator complex subunit 25 [Source:HGNC Symbol;Acc:28845]	50321536	50342036	0		+	0.627122	intron	same
2054	D1	P	19	50341142	50341756	614	+	0.195603	0.195603	MED25	ENSG00000104973	mediator complex subunit 25 [Source:HGNC Symbol;Acc:28845]	50321536	50342036	0		+	0.627122	intron	same
2055	D1	P	19	50341144	50341756	612	+	0.196241	0.196241	MED25	ENSG00000104973	mediator complex subunit 25 [Source:HGNC Symbol;Acc:28845]	50321536	50342036	0		+	0.627122	intron	same
2093	D1	P	20	32351149	32351650	501	+	0.0149771	0.0149771	ZNF341	ENSG00000131061	zinc finger protein 341 [Source:HGNC Symbol;Acc:15992]	32319463	32380075	0		+	0.0854642	intron	same
2115	D1	P	21	15917465	15917966	501	-	0.0599083	0.0449312	SAMSN1	ENSG00000155307	SAM domain, SH3 domain and nuclear localization signals 1 [Source:HGNC Symbol;Acc:10528]	15857549	15955723	0		-	0.304339	intron	same
2116	D1	P	21	17234234	17234735	501	+	0.179725	0.194702	USP25	ENSG00000155313	ubiquitin specific peptidase 25 [Source:HGNC Symbol;Acc:12624]	17102344	17252377	0		+	0.50142	intron	same
2161	D1	P	22	40612987	40613488	501	+	0.733877	0.793785	TNRC6B	ENSG00000100354	trinucleotide repeat containing 6B [Source:HGNC Symbol;Acc:29190]	40440821	40731811	0		+	1.13734	intron	same
2167	D1	P	22	44504846	44505347	501	+	0.0449312	0.0449312	PARVB	ENSG00000188677	parvin, beta [Source:HGNC Symbol;Acc:14653]	44395091	44565106	0		+	0.0311767	intron	same
2168	D1	P	22	46103444	46104066	622	+	0.0241364	0.0362046	ATXN10	ENSG00000130638	ataxin 10 [Source:HGNC Symbol;Acc:10549]	46067678	46241187	0		+	0.186543	intron	same
17	D1	P	1	16948790	16949291	501	-	2.66592	2.6809	CROCCP2	ENSG00000215908	ciliary rootlet coiled-coil, rootletin pseudogene 2 [Source:HGNC Symbol;Acc:28170]	16944751	16971178	0		-	0.985188	utr	same
39	D1	P	1	32723445	32724077	632	+	1.90041	2.03106	LCK	ENSG00000182866	lymphocyte-specific protein tyrosine kinase [Source:HGNC Symbol;Acc:6524]	32716840	32751766	0		+	2.36703	utr	same
246	D1	P	2	136326612	136327230	618	+	0.0242924	0.0242924	R3HDM1	ENSG00000048991	R3H domain containing 1 [Source:HGNC Symbol;Acc:9757]	136289025	136482840	0		+	0.1978	utr	same
370	D1	P	3	88211456	88212078	622	+	2.8843	2.87223	RP11-373L8.2	ENSG00000244150	No description	88206039	88217879	0		+	1.27181	utr	same
416	D1	P	3	177439145	177439759	614	+	0	0	RP11-335L9.1	ENSG00000228221	No description	177159709	177470093	0		+	0.000993	utr	same
435	D1	P	4	1879162	1879663	501	+	0.329496	0.344473	WHSC1	ENSG00000109685	Wolf-Hirschhorn syndrome candidate 1 [Source:HGNC Symbol;Acc:12766]	1873151	1983934	0		+	0.317275	utr	same
436	D1	P	4	1879167	1879780	613	+	0.269392	0.293882	WHSC1	ENSG00000109685	Wolf-Hirschhorn syndrome candidate 1 [Source:HGNC Symbol;Acc:12766]	1873151	1983934	0		+	0.317275	utr	same
485	D1	P	4	102556418	102557031	613	+	0	0	BANK1	ENSG00000153064	B-cell scaffold protein with ankyrin repeats 1 [Source:HGNC Symbol;Acc:18233]	102332443	102995969	0		+	0.00117844	utr	same
900	D1	P	8	2117396	2117897	501	+	0.0299542	0.0449312	RP11-1049H7.1	ENSG00000254304	No description	2104674	2142690	0		+	0.0077129	utr	same
901	D1	P	8	2117396	2118010	614	+	0.0244504	0.0366756	RP11-1049H7.1	ENSG00000254304	No description	2104674	2142690	0		+	0.0077129	utr	same
915	D1	P	8	28755136	28755637	501	+	0.0299542	0.0449312	AC108449.3	ENSG00000259412	No description	28718058	28810397	0		+	0.0458405	utr	same
1069	D1	P	10	8945550	8946051	501	+	0	0	RP11-428L9.1	ENSG00000234752	No description	8939952	8956559	0		+	0.00226352	utr	same
1070	D1	P	10	8945551	8946052	501	+	0	0	RP11-428L9.1	ENSG00000234752	No description	8939952	8956559	0		+	0.00226352	utr	same
1071	D1	P	10	8945555	8946168	613	+	0	0	RP11-428L9.1	ENSG00000234752	No description	8939952	8956559	0		+	0.00226352	utr	same
1270	D1	P	11	109355284	109355785	501	-	0	0	RP11-708B6.2	ENSG00000255028	No description	109225812	109454633	0		-	0.000559	utr	same
1473	D1	P	14	65983535	65984036	501	+	0.0449312	0.0599083	FUT8	ENSG00000033170	fucosyltransferase 8 (alpha (1,6) fucosyltransferase) [Source:HGNC Symbol;Acc:4019]	65877310	66210839	0		+	0.158269	utr	same
1557	D1	P	16	290488	290989	501	+	0.134794	0.10484	ITFG3	ENSG00000167930	integrin alpha FG-GAP repeat containing 3 [Source:HGNC Symbol;Acc:14163]	284545	319942	0		+	0.322846	utr	same
1692	D1	P	16	89519737	89520238	501	-	0.748854	0.748854	ANKRD11	ENSG00000167522	ankyrin repeat domain 11 [Source:HGNC Symbol;Acc:21316]	89334035	89556969	0		-	1.19403	utr	same
1693	D1	P	16	89519738	89520239	501	-	0.748854	0.748854	ANKRD11	ENSG00000167522	ankyrin repeat domain 11 [Source:HGNC Symbol;Acc:21316]	89334035	89556969	0		-	1.19403	utr	same
1715	D1	P	17	4952473	4952974	501	-	0.0599083	0.0748854	GPR172B	ENSG00000132517	G protein-coupled receptor 172B [Source:HGNC Symbol;Acc:30225]	4935895	4955304	0		-	0.0460948	utr	same
1952	D1	P	19	9441387	9442009	622	+	0.229296	0.241364	ZNF559	ENSG00000188321	zinc finger protein 559 [Source:HGNC Symbol;Acc:28197]	9434873	9454519	0		+	0.446969	utr	same
2142	D1	P	21	46509556	46510178	622	+	0.0724092	0.0724092	ADARB1	ENSG00000197381	adenosine deaminase, RNA-specific, B1 [Source:HGNC Symbol;Acc:226]	46493768	46646478	0		+	0.249761	utr	same
2178	D1	P	22	50824543	50825044	501	+	0.539175	0.419358	PPP6R2	ENSG00000100239	protein phosphatase 6, regulatory subunit 2 [Source:HGNC Symbol;Acc:19253]	50781733	50883514	0		+	0.742897	utr	same
2179	D1	P	22	50824544	50825045	501	+	0.539175	0.419358	PPP6R2	ENSG00000100239	protein phosphatase 6, regulatory subunit 2 [Source:HGNC Symbol;Acc:19253]	50781733	50883514	0		+	0.742897	utr	same
2205	D1	P	X	48574268	48574769	501	-	0.0599083	0.0748854	AF196970.3	ENSG00000232828	No description	48557354	48595570	0		-	0.191223	utr	same
1566	D1	P	16	2044351	2044973	622	+	0.0120682	0.0120682	SYNGR3	ENSG00000127561	synaptogyrin 3 [Source:HGNC Symbol;Acc:11501]	2039946	2044276	75		+	0.0138878	NA	same
2152	D1	P	22	36647518	36648140	622	+	0.0482728	0.0241364	APOL1	ENSG00000100342	apolipoprotein L, 1 [Source:HGNC Symbol;Acc:618]	36649056	36663576	916		+	0.297198	NA	same
1986	D1	P	19	18198655	18199156	501	-	0	0	IL12RB1	ENSG00000096996	interleukin 12 receptor, beta 1 [Source:HGNC Symbol;Acc:5971]	18170371	18197697	958		-	0.323829	NA	same
894	D1	P	7	155057188	155057801	613	+	0.0122451	0.0122451	AC099552.2	ENSG00000225612	No description	155059009	155059762	1208		+	0	NA	same
893	D1	P	7	155057186	155057687	501	+	0.0149771	0	AC099552.2	ENSG00000225612	No description	155059009	155059762	1322		+	0	NA	same
1065	D1	P	10	6668657	6669158	501	+	2.63597	2.5461	RP11-554I8.1	ENSG00000225948	No description	6660678	6667308	1349		+	1.33906	NA	same
2031	D2	P	19	46211211	46211869	658	+	0.0342268	0.0228179				0	NA	2018		NA	NA	NA	NA
2033	D2	P	19	46211319	46211820	501	+	0.0299542	0.0149771				0	NA	2067		NA	NA	NA	NA
2032	D2	P	19	46211316	46211817	501	+	0.0299542	0.0149771				0	NA	2070		NA	NA	NA	NA
699	D2	P	6	35292070	35292691	621	+	0.954921	0.942834				0	NA	2522		NA	NA	NA	NA
1502	D2	P	14	107186886	107187387	501	-	0	0				0	NA	3029		NA	NA	NA	NA
50	D2	P	1	40353919	40354420	501	-	0	0.0149771				0	NA	4736		NA	NA	NA	NA
684	D2	P	6	31176699	31177200	501	+	0.329496	0.374427				0	NA	4954		NA	NA	NA	NA
1302	D2	P	12	6847535	6848148	613	+	0.269392	0.281637				0	NA	6494		NA	NA	NA	NA
200	D2	P	2	26978930	26979542	612	+	0	0.0245302				0	NA	7610		NA	NA	NA	NA
199	D2	P	2	26978929	26979430	501	+	0	0.0299542				0	NA	7722		NA	NA	NA	NA
198	D2	P	2	26978928	26979429	501	+	0	0.0299542				0	NA	7723		NA	NA	NA	NA
197	D2	P	2	26978924	26979425	501	+	0	0.0299542				0	NA	7727		NA	NA	NA	NA
196	D2	P	2	26978767	26979268	501	+	0	0.0299542				0	NA	7884		NA	NA	NA	NA
925	D2	P	8	53842282	53842783	501	+	0	0				0	NA	8208		NA	NA	NA	NA
2079	D2	P	19	59094359	59094860	501	-	0.913602	0.853694				0	NA	9417		NA	NA	NA	NA
930	D2	P	8	66764509	66765128	619	+	0	0				0	NA	9952		NA	NA	NA	NA
598	D2	P	5	102549487	102549988	501	-	0.0449312	0.0449312				0	NA	10550		NA	NA	NA	NA
1227	D2	P	11	67684915	67685416	501	-	0.0449312	0.10484				0	NA	11094		NA	NA	NA	NA
1350	D2	P	12	91484490	91484991	501	-	0	0				0	NA	11415		NA	NA	NA	NA
2185	D2	P	X	13010709	13011338	629	+	0	0				0	NA	15363		NA	NA	NA	NA
542	D2	P	4	191031149	191031770	621	+	0	0				0	NA	17430		NA	NA	NA	NA
150	D2	P	1	210046163	210046664	501	-	0	0				0	NA	20605		NA	NA	NA	NA
1947	D2	P	19	8244950	8245451	501	+	0.0599083	0.0299542				0	NA	26169		NA	NA	NA	NA
1374	D2	P	12	120349453	120350067	614	+	0	0				0	NA	34358		NA	NA	NA	NA
64	D2	P	1	66905377	66905990	613	+	0.0122451	0.0122451				0	NA	65118		NA	NA	NA	NA
319	D2	P	3	5910896	5911397	501	-	0	0				0	NA	93132		NA	NA	NA	NA
1079	D2	P	10	29302337	29302838	501	+	0	0				0	NA	131510		NA	NA	NA	NA
1665	D2	P	16	80442605	80443106	501	-	0	0				0	NA	131748		NA	NA	NA	NA
1860	D2	P	18	2288650	2289151	501	-	0	0				0	NA	248373		NA	NA	NA	NA
48	D2	P	1	39792722	39793223	501	-	1.40785	1.57259	MACF1	ENSG00000127603	microtubule-actin crosslinking factor 1 [Source:HGNC Symbol;Acc:13664]	39546988	39952789	0		+	0.37772	exon	opposite
54	D2	P	1	43916873	43917374	501	-	3.13021	3.47468	SZT2	ENSG00000198198	seizure threshold 2 homolog (mouse) [Source:HGNC Symbol;Acc:29040]	43886428	43918321	0		+	2.08624	exon	opposite
135	D2	P	1	183484755	183485256	501	-	0.97351	1.22812	SMG7	ENSG00000116698	smg-7 homolog, nonsense mediated mRNA decay factor (C. elegans) [Source:HGNC Symbol;Acc:16792]	183441351	183567381	0		+	0.330016	exon	opposite
455	D2	P	4	47900070	47900684	614	+	0.134477	0.195603	NFXL1	ENSG00000170448	nuclear transcription factor, X-box binding-like 1 [Source:HGNC Symbol;Acc:18726]	47849257	47916653	0		-	0.144687	exon	opposite
594	D2	P	5	96076455	96076956	501	-	0.389404	0.344473	CAST	ENSG00000153113	calpastatin [Source:HGNC Symbol;Acc:1515]	95865525	96115299	0		+	0.359437	exon	opposite
649	D2	P	5	178050035	178050657	622	+	1.48439	1.35164	CLK4	ENSG00000113240	CDC-like kinase 4 [Source:HGNC Symbol;Acc:13659]	178029665	178057616	0		-	1.01217	exon	opposite
651	D2	P	5	179043421	179043922	501	+	13.0151	11.5923	HNRNPH1	ENSG00000169045	heterogeneous nuclear ribonucleoprotein H1 (H) [Source:HGNC Symbol;Acc:5041]	179041179	179061785	0		-	5.81464	exon	opposite
876	D2	P	7	138943851	138944352	501	-	0.224656	0.269587	UBN2	ENSG00000157741	ubinuclein 2 [Source:HGNC Symbol;Acc:21931]	138915102	138992981	0		+	0.194913	exon	opposite
1187	D2	P	11	62491256	62491869	613	+	3.747	4.07762	RP11-831H9.16	ENSG00000234857	No description	62457747	62494856	0		-	0.947966	exon	opposite
1324	D2	P	12	50149635	50150136	501	-	0.374427	0.374427	TMBIM6	ENSG00000139644	transmembrane BAX inhibitor motif containing 6 [Source:HGNC Symbol;Acc:11723]	50101508	50158717	0		+	0.717549	exon	opposite
1535	D2	P	15	83686802	83687303	501	+	1.99195	1.90209	BTBD1	ENSG00000064726	BTB (POZ) domain containing 1 [Source:HGNC Symbol;Acc:1120]	83685174	83736106	0		-	0.724201	exon	opposite
1564	D2	P	16	1877675	1878176	501	-	1.21314	0.958533	FAHD1	ENSG00000180185	fumarylacetoacetate hydrolase domain containing 1 [Source:HGNC Symbol;Acc:14169]	1876968	1890208	0		+	0.202711	exon	opposite
1872	D2	P	18	23865793	23866294	501	-	2.81569	2.63597	TAF4B	ENSG00000141384	TAF4b RNA polymerase II, TATA box binding protein (TBP)-associated factor, 105kDa [Source:HGNC Symbol;Acc:11538]	23806409	23971642	0		+	0.201392	exon	opposite
1912	D2	P	19	1475232	1475852	620	+	0.484283	0.411641	C19orf25	ENSG00000119559	chromosome 19 open reading frame 25 [Source:HGNC Symbol;Acc:26711]	1473203	1479228	0		-	0.592646	exon	opposite
1972	D2	P	19	13038777	13039390	613	+	0.942873	0.893893	FARSA	ENSG00000179115	phenylalanyl-tRNA synthetase, alpha subunit [Source:HGNC Symbol;Acc:3592]	13033284	13044558	0		-	0.602813	exon	opposite
2109	D2	P	20	61572494	61572995	501	-	2.90555	3.57952	C20orf11	ENSG00000101193	chromosome 20 open reading frame 11 [Source:HGNC Symbol;Acc:15857]	61569471	61578019	0		+	2.30682	exon	opposite
2110	D2	P	20	61572553	61573054	501	-	2.96546	3.51961	C20orf11	ENSG00000101193	chromosome 20 open reading frame 11 [Source:HGNC Symbol;Acc:15857]	61569471	61578019	0		+	2.30682	exon	opposite
2170	D2	P	22	46114216	46114717	501	-	0.868671	0.913602	ATXN10	ENSG00000130638	ataxin 10 [Source:HGNC Symbol;Acc:10549]	46067678	46241187	0		+	0.186543	exon	opposite
2186	D2	P	X	13056381	13056882	501	+	0	0	FAM9C	ENSG00000187268	family with sequence similarity 9, member C [Source:HGNC Symbol;Acc:18405]	13053737	13062801	0		-	0.00331759	exon	opposite
7	D2	P	1	8541649	8542150	501	+	0.0748854	0.0599083	RERE	ENSG00000142599	arginine-glutamic acid dipeptide (RE) repeats [Source:HGNC Symbol;Acc:9965]	8412457	8877702	0		-	0.266919	intron	opposite
12	D2	P	1	9859200	9859822	622	+	0.13275	0.168955	CLSTN1	ENSG00000171603	calsyntenin 1 [Source:HGNC Symbol;Acc:17447]	9789084	9884584	0		-	0.733419	intron	opposite
44	D2	P	1	35977113	35977614	501	+	0.0748854	0.0748854	KIAA0319L	ENSG00000142687	KIAA0319-like [Source:HGNC Symbol;Acc:30071]	35899091	36023551	0		-	0.462004	intron	opposite
58	D2	P	1	48863190	48863691	501	+	0	0	SPATA6	ENSG00000132122	spermatogenesis associated 6 [Source:HGNC Symbol;Acc:18309]	48761044	48937845	0		-	0.0346153	intron	opposite
60	D2	P	1	52953773	52954391	618	+	1.62759	1.78549	ZCCHC11	ENSG00000134744	zinc finger, CCHC domain containing 11 [Source:HGNC Symbol;Acc:28981]	52873954	53019159	0		-	1.15103	intron	opposite
79	D2	P	1	108272405	108272906	501	+	0	0	VAV3	ENSG00000134215	vav 3 guanine nucleotide exchange factor [Source:HGNC Symbol;Acc:12659]	108113782	108507766	0		-	0.0246555	intron	opposite
106	D2	P	1	153910497	153910998	501	+	0.0449312	0.0299542	DENND4B	ENSG00000198837	DENN/MADD domain containing 4B [Source:HGNC Symbol;Acc:29044]	153901977	153919172	0		-	2.85026	intron	opposite
161	D2	P	1	229689930	229690431	501	+	1.00346	1.01844	ABCB10	ENSG00000135776	ATP-binding cassette, sub-family B (MDR/TAP), member 10 [Source:HGNC Symbol;Acc:41]	229652329	229694442	0		-	0.460422	intron	opposite
175	D2	P	2	1936277	1936899	622	+	0.0120682	0	MYT1L	ENSG00000186487	myelin transcription factor 1-like [Source:HGNC Symbol;Acc:7623]	1792885	2335032	0		-	0.0010401	intron	opposite
181	D2	P	2	3411768	3412269	501	-	0.269587	0.299542	TTC15	ENSG00000171853	tetratricopeptide repeat domain 15 [Source:HGNC Symbol;Acc:24284]	3383446	3488865	0		+	0.699358	intron	opposite
185	D2	P	2	17870090	17870704	614	+	0	0	SMC6	ENSG00000163029	structural maintenance of chromosomes 6 [Source:HGNC Symbol;Acc:20466]	17845079	17981509	0		-	0.110603	intron	opposite
263	D2	P	2	170670963	170671577	614	+	0.134477	0.110027	METTL5	ENSG00000138382	methyltransferase like 5 [Source:HGNC Symbol;Acc:25006]	170666591	170681441	0		-	0.739142	intron	opposite
299	D2	P	2	217043641	217044142	501	-	0.10484	0.0898625	XRCC5	ENSG00000079246	X-ray repair complementing defective repair in Chinese hamster cells 5 (double-strand-break rejoining) [Source:HGNC Symbol;Acc:12833]	216972187	217071026	0		+	0.674489	intron	opposite
309	D2	P	2	230742468	230743089	621	+	0.157139	0.169227	TRIP12	ENSG00000153827	thyroid hormone receptor interactor 12 [Source:HGNC Symbol;Acc:12306]	230631930	230787955	0		-	0.634629	intron	opposite
352	D2	P	3	51476353	51476946	593	+	0.202518	0.177204	VPRBP	ENSG00000145041	Vpr (HIV-1) binding protein [Source:HGNC Symbol;Acc:30911]	51433298	51534010	0		-	0.559895	intron	opposite
362	D2	P	3	58629841	58630458	617	+	0	0	FAM3D	ENSG00000198643	family with sequence similarity 3, member D [Source:HGNC Symbol;Acc:18665]	58619673	58652575	0		-	0.000914	intron	opposite
429	D2	P	3	197004164	197004786	622	+	0.0362046	0.0241364	DLG1	ENSG00000075711	discs, large homolog 1 (Drosophila) [Source:HGNC Symbol;Acc:2900]	196769431	197026171	0		-	0.225577	intron	opposite
516	D2	P	4	146819710	146820323	613	+	0.0122451	0.0122451	ZNF827	ENSG00000151612	zinc finger protein 827 [Source:HGNC Symbol;Acc:27193]	146678779	146859787	0		-	0.14758	intron	opposite
523	D2	P	4	154313267	154313768	501	-	0	0	MND1	ENSG00000121211	meiotic nuclear divisions 1 homolog (S. cerevisiae) [Source:HGNC Symbol;Acc:24839]	154265801	154336270	0		+	0.0214448	intron	opposite
529	D2	P	4	170570423	170570924	501	-	0	0	CLCN3	ENSG00000109572	chloride channel 3 [Source:HGNC Symbol;Acc:2021]	170533784	170644824	0		+	0.102715	intron	opposite
587	D2	P	5	77447873	77448486	613	+	0.0489804	0.0489804	AP3B1	ENSG00000132842	adaptor-related protein complex 3, beta 1 subunit [Source:HGNC Symbol;Acc:566]	77296349	77590579	0		-	0.137603	intron	opposite
597	D2	P	5	102344117	102344618	501	-	0.149771	0.119817	PAM	ENSG00000145730	peptidylglycine alpha-amidating monooxygenase [Source:HGNC Symbol;Acc:8596]	102089685	102366809	0		+	0.073903	intron	opposite
618	D2	P	5	132217293	132218024	731	+	0.143796	0.184881	AFF4	ENSG00000072364	AF4/FMR2 family, member 4 [Source:HGNC Symbol;Acc:17869]	132211071	132299326	0		-	1.071	intron	opposite
619	D2	P	5	132217408	132217909	501	+	0.10484	0.10484	AFF4	ENSG00000072364	AF4/FMR2 family, member 4 [Source:HGNC Symbol;Acc:17869]	132211071	132299326	0		-	1.071	intron	opposite
620	D2	P	5	132217410	132217911	501	+	0.10484	0.10484	AFF4	ENSG00000072364	AF4/FMR2 family, member 4 [Source:HGNC Symbol;Acc:17869]	132211071	132299326	0		-	1.071	intron	opposite
621	D2	P	5	132217411	132217912	501	+	0.10484	0.10484	AFF4	ENSG00000072364	AF4/FMR2 family, member 4 [Source:HGNC Symbol;Acc:17869]	132211071	132299326	0		-	1.071	intron	opposite
644	D2	P	5	176596820	176597321	501	-	0.0898625	0.119817	NSD1	ENSG00000165671	nuclear receptor binding SET domain protein 1 [Source:HGNC Symbol;Acc:14234]	176560026	176727216	0		+	0.48702	intron	opposite
674	D2	P	6	28259715	28260216	501	-	0.209679	0.179725	PGBD1	ENSG00000137338	piggyBac transposable element derived 1 [Source:HGNC Symbol;Acc:19398]	28249314	28270326	0		+	0.2247	intron	opposite
675	D2	P	6	30031194	30031695	501	-	0.0748854	0.0748854	ZNRD1	ENSG00000066379	zinc ribbon domain containing 1 [Source:HGNC Symbol;Acc:13182]	30026676	30032686	0		+	0.750474	intron	opposite
680	D2	P	6	30677293	30677908	615	+	0.15867	0.195286	MDC1	ENSG00000137337	mediator of DNA-damage checkpoint 1 [Source:HGNC Symbol;Acc:21163]	30667584	30685666	0		-	1.36375	intron	opposite
688	D2	P	6	31662966	31663599	633	+	0.0711529	0.0474353	ABHD16A	ENSG00000204427	abhydrolase domain containing 16A [Source:HGNC Symbol;Acc:13921]	31654726	31671221	0		-	0.56334	intron	opposite
696	D2	P	6	34660078	34660579	501	+	0.0149771	0.0299542	C6orf106	ENSG00000196821	chromosome 6 open reading frame 106 [Source:HGNC Symbol;Acc:21215]	34555065	34664636	0		-	0.236591	intron	opposite
697	D2	P	6	34731948	34732449	501	-	0.209679	0.119817	SNRPC	ENSG00000124562	small nuclear ribonucleoprotein polypeptide C [Source:HGNC Symbol;Acc:11157]	34725183	34741571	0		+	0.658768	intron	opposite
727	D2	P	6	94063152	94063772	620	+	0	0	EPHA7	ENSG00000135333	EPH receptor A7 [Source:HGNC Symbol;Acc:3390]	93949738	94129265	0		-	0.000251	intron	opposite
737	D2	P	6	106728969	106729470	501	+	0.0748854	0.0898625	ATG5	ENSG00000057663	ATG5 autophagy related 5 homolog (S. cerevisiae) [Source:HGNC Symbol;Acc:589]	106632351	106773666	0		-	0.137584	intron	opposite
738	D2	P	6	108196074	108196575	501	+	0.404381	0.314519	SEC63	ENSG00000025796	SEC63 homolog (S. cerevisiae) [Source:HGNC Symbol;Acc:21082]	108188960	108279482	0		-	0.434965	intron	opposite
739	D2	P	6	108224509	108225122	613	+	0.110206	0.146941	SEC63	ENSG00000025796	SEC63 homolog (S. cerevisiae) [Source:HGNC Symbol;Acc:21082]	108188960	108279482	0		-	0.434965	intron	opposite
740	D2	P	6	108930669	108931170	501	-	0.449312	0.419358	FOXO3	ENSG00000118689	forkhead box O3 [Source:HGNC Symbol;Acc:3821]	108881038	109005977	0		+	0.252321	intron	opposite
750	D2	P	6	135316908	135317529	621	+	0.374716	0.374716	HBS1L	ENSG00000112339	HBS1-like (S. cerevisiae) [Source:HGNC Symbol;Acc:4834]	135281516	135424194	0		-	0.298044	intron	opposite
790	D2	P	7	11115736	11116237	501	-	0.164748	0.209679	PHF14	ENSG00000106443	PHD finger protein 14 [Source:HGNC Symbol;Acc:22203]	11013499	11209250	0		+	0.172415	intron	opposite
813	D2	P	7	36443392	36443893	501	-	0	0.0149771	ANLN	ENSG00000011426	anillin, actin binding protein [Source:HGNC Symbol;Acc:14082]	36429415	36493400	0		+	0.0145703	intron	opposite
814	D2	P	7	36443393	36443894	501	-	0	0.0149771	ANLN	ENSG00000011426	anillin, actin binding protein [Source:HGNC Symbol;Acc:14082]	36429415	36493400	0		+	0.0145703	intron	opposite
815	D2	P	7	36443395	36443896	501	-	0	0.0149771	ANLN	ENSG00000011426	anillin, actin binding protein [Source:HGNC Symbol;Acc:14082]	36429415	36493400	0		+	0.0145703	intron	opposite
816	D2	P	7	38248188	38248689	501	-	0.119817	0.0748854	STARD3NL	ENSG00000010270	STARD3 N-terminal like [Source:HGNC Symbol;Acc:19169]	38217824	38270272	0		+	0.118693	intron	opposite
849	D2	P	7	99782817	99783318	501	-	0.0449312	0.0599083	STAG3	ENSG00000066923	stromal antigen 3 [Source:HGNC Symbol;Acc:11356]	99775186	99819111	0		+	0.806176	intron	opposite
948	D2	P	8	101280376	101280877	501	+	0.449312	0.434335	RNF19A	ENSG00000034677	ring finger protein 19A [Source:HGNC Symbol;Acc:13432]	101269288	101348446	0		-	0.624396	intron	opposite
950	D2	P	8	101530107	101530608	501	+	0.314519	0.35945	ANKRD46	ENSG00000186106	ankyrin repeat domain 46 [Source:HGNC Symbol;Acc:27229]	101521980	101572012	0		-	0.312112	intron	opposite
979	D2	P	8	146001292	146001793	501	+	0.0599083	0.0599083	ZNF34	ENSG00000196378	zinc finger protein 34 [Source:HGNC Symbol;Acc:13098]	145997611	146012730	0		-	0.123816	intron	opposite
1037	D2	P	9	127946010	127946628	618	+	0.60731	0.704479	PPP6C	ENSG00000119414	protein phosphatase 6, catalytic subunit [Source:HGNC Symbol;Acc:9323]	127908852	127952218	0		-	1.16452	intron	opposite
1061	D2	P	10	5832228	5832729	501	+	0.0748854	0.0599083	GDI2	ENSG00000057608	GDP dissociation inhibitor 2 [Source:HGNC Symbol;Acc:4227]	5807186	5884095	0		-	0.31204	intron	opposite
1097	D2	P	10	63725423	63725924	501	-	0	0	ARID5B	ENSG00000150347	AT rich interactive domain 5B (MRF1-like) [Source:HGNC Symbol;Acc:17362]	63661059	63856703	0		+	0.219931	intron	opposite
1152	D2	P	11	3772927	3773599	672	+	0.826699	0.826699	NUP98	ENSG00000110713	nucleoporin 98kDa [Source:HGNC Symbol;Acc:8068]	3692313	3819022	0		-	0.660056	intron	opposite
1162	D2	P	11	13444929	13445430	501	+	0.209679	0.209679	BTBD10	ENSG00000148925	BTB (POZ) domain containing 10 [Source:HGNC Symbol;Acc:21445]	13409548	13484844	0		-	0.171444	intron	opposite
1182	D2	P	11	46800220	46800721	501	+	0.0149771	0	CKAP5	ENSG00000175216	cytoskeleton associated protein 5 [Source:HGNC Symbol;Acc:28959]	46764598	46867847	0		-	0.245762	intron	opposite
1190	D2	P	11	62586002	62586503	501	+	1.22812	1.1083	STX5	ENSG00000162236	syntaxin 5 [Source:HGNC Symbol;Acc:11440]	62574369	62599560	0		-	1.08963	intron	opposite
1209	D2	P	11	65916974	65917475	501	-	0.389404	0.509221	PACS1	ENSG00000175115	phosphofurin acidic cluster sorting protein 1 [Source:HGNC Symbol;Acc:30032]	65837834	66012218	0		+	1.23126	intron	opposite
1240	D2	P	11	74465158	74465659	501	-	0.194702	0.149771	RNF169	ENSG00000166439	ring finger protein 169 [Source:HGNC Symbol;Acc:26961]	74459913	74553458	0		+	0.714589	intron	opposite
1293	D2	P	11	128357191	128357692	501	+	1.99195	1.99195	ETS1	ENSG00000134954	v-ets erythroblastosis virus E26 oncogene homolog 1 (avian) [Source:HGNC Symbol;Acc:3488]	128328656	128457437	0		-	1.43385	intron	opposite
1300	D2	P	12	3940748	3941368	620	+	0.0847495	0.0605354	PARP11	ENSG00000111224	poly (ADP-ribose) polymerase family, member 11 [Source:HGNC Symbol;Acc:1186]	3900213	3982608	0		-	0.322563	intron	opposite
1349	D2	P	12	82847735	82848236	501	-	0.0149771	0.0149771	C12orf26	ENSG00000127720	chromosome 12 open reading frame 26 [Source:HGNC Symbol;Acc:26228]	82752276	82873015	0		+	0.0832551	intron	opposite
1360	D2	P	12	100178822	100179323	501	+	0	0	ANKS1B	ENSG00000185046	ankyrin repeat and sterile alpha motif domain containing 1B [Source:HGNC Symbol;Acc:24600]	99120235	100378432	0		-	0.00409927	intron	opposite
1370	D2	P	12	112513693	112514194	501	+	0.0599083	0.0449312	NAA25	ENSG00000111300	N(alpha)-acetyltransferase 25, NatB auxiliary subunit [Source:HGNC Symbol;Acc:25783]	112464500	112546826	0		-	0.69416	intron	opposite
1397	D2	P	13	33070683	33071302	619	+	0.618457	0.56995	N4BP2L2	ENSG00000244754	NEDD4 binding protein 2-like 2 [Source:HGNC Symbol;Acc:26916]	33006924	33112970	0		-	1.20058	intron	opposite
1405	D2	P	13	42741358	42741859	501	-	0.164748	0.164748	DGKH	ENSG00000102780	diacylglycerol kinase, eta [Source:HGNC Symbol;Acc:2854]	42614176	42830714	0		+	0.0692688	intron	opposite
1406	D2	P	13	42741359	42741860	501	-	0.164748	0.164748	DGKH	ENSG00000102780	diacylglycerol kinase, eta [Source:HGNC Symbol;Acc:2854]	42614176	42830714	0		+	0.0692688	intron	opposite
1407	D2	P	13	42741360	42741861	501	-	0.164748	0.149771	DGKH	ENSG00000102780	diacylglycerol kinase, eta [Source:HGNC Symbol;Acc:2854]	42614176	42830714	0		+	0.0692688	intron	opposite
1438	D2	P	13	111339064	111339677	613	+	0.416334	0.404088	CARS2	ENSG00000134905	cysteinyl-tRNA synthetase 2, mitochondrial (putative) [Source:HGNC Symbol;Acc:25695]	111290133	111365950	0		-	1.01585	intron	opposite
1491	D2	P	14	93750057	93750558	501	+	0.10484	0.149771	BTBD7	ENSG00000011114	BTB (POZ) domain containing 7 [Source:HGNC Symbol;Acc:18269]	93703896	93799438	0		-	0.227263	intron	opposite
1493	D2	P	14	93793631	93794244	613	+	0.146941	0.122451	BTBD7	ENSG00000011114	BTB (POZ) domain containing 7 [Source:HGNC Symbol;Acc:18269]	93703896	93799438	0		-	0.227263	intron	opposite
1523	D2	P	15	64804145	64804646	501	-	0.134794	0.134794	ZNF609	ENSG00000180357	zinc finger protein 609 [Source:HGNC Symbol;Acc:29003]	64791491	64978264	0		+	0.481766	intron	opposite
1548	D2	P	15	99242407	99242908	501	-	0.419358	0.344473	IGF1R	ENSG00000140443	insulin-like growth factor 1 receptor [Source:HGNC Symbol;Acc:5465]	99192200	99507759	0		+	0.587784	intron	opposite
1568	D2	P	16	2295263	2295934	671	+	0.0559412	0.0559412	ECI1	ENSG00000167969	enoyl-CoA delta isomerase 1 [Source:HGNC Symbol;Acc:2703]	2289396	2301615	0		-	0.218418	intron	opposite
1569	D2	P	16	2295316	2295817	501	+	0.0299542	0.0599083	ECI1	ENSG00000167969	enoyl-CoA delta isomerase 1 [Source:HGNC Symbol;Acc:2703]	2289396	2301615	0		-	0.218418	intron	opposite
1570	D2	P	16	2295319	2295820	501	+	0.0299542	0.0599083	ECI1	ENSG00000167969	enoyl-CoA delta isomerase 1 [Source:HGNC Symbol;Acc:2703]	2289396	2301615	0		-	0.218418	intron	opposite
1571	D2	P	16	2295320	2295821	501	+	0.0299542	0.0599083	ECI1	ENSG00000167969	enoyl-CoA delta isomerase 1 [Source:HGNC Symbol;Acc:2703]	2289396	2301615	0		-	0.218418	intron	opposite
1578	D2	P	16	2309132	2309633	501	+	3.32491	3.13021	RNPS1	ENSG00000205937	RNA binding protein S1, serine-rich domain [Source:HGNC Symbol;Acc:10080]	2303117	2318379	0		-	2.70632	intron	opposite
1581	D2	P	16	3893515	3894016	501	+	0.0449312	0.0449312	CREBBP	ENSG00000005339	CREB binding protein [Source:HGNC Symbol;Acc:2348]	3775055	3930722	0		-	0.905399	intron	opposite
1640	D2	P	16	48620777	48621278	501	+	0.554152	0.658991	N4BP1	ENSG00000102921	NEDD4 binding protein 1 [Source:HGNC Symbol;Acc:29850]	48572639	48644120	0		-	0.931476	intron	opposite
1653	D2	P	16	67071022	67071523	501	-	0.0898625	0.10484	CBFB	ENSG00000067955	core-binding factor, beta subunit [Source:HGNC Symbol;Acc:1539]	67063050	67134961	0		+	0.288353	intron	opposite
1655	D2	P	16	67302707	67303208	501	-	0.149771	0.179725	SLC9A5	ENSG00000135740	solute carrier family 9 (sodium/hydrogen exchanger), member 5 [Source:HGNC Symbol;Acc:11078]	67282855	67306093	0		+	0.270147	intron	opposite
1697	D2	P	16	89876409	89876910	501	+	0.0748854	0.10484	FANCA	ENSG00000187741	Fanconi anemia, complementation group A [Source:HGNC Symbol;Acc:3582]	89803959	89883065	0		-	0.368668	intron	opposite
1709	D2	P	17	4107192	4107693	501	+	0.224656	0.164748	ANKFY1	ENSG00000185722	ankyrin repeat and FYVE domain containing 1 [Source:HGNC Symbol;Acc:20763]	4066665	4167274	0		-	0.59163	intron	opposite
1736	D2	P	17	28584482	28585104	622	+	0.0724092	0.0362046	BLMH	ENSG00000108578	bleomycin hydrolase [Source:HGNC Symbol;Acc:1059]	28575223	28619074	0		-	0.401882	intron	opposite
1738	D2	P	17	28756418	28756919	501	-	0	0.0149771	CPD	ENSG00000108582	carboxypeptidase D [Source:HGNC Symbol;Acc:2301]	28705942	28796730	0		+	0.166454	intron	opposite
1751	D2	P	17	35558146	35558759	613	+	0.0734706	0.0979608	ACACA	ENSG00000132142	acetyl-CoA carboxylase alpha [Source:HGNC Symbol;Acc:84]	35441923	35766902	0		-	0.0984636	intron	opposite
1827	D2	P	17	76751697	76752198	501	+	0.958533	1.0484	CYTH1	ENSG00000108669	cytohesin 1 [Source:HGNC Symbol;Acc:9501]	76670130	76778379	0		-	1.9414	intron	opposite
1838	D2	P	17	79227104	79227776	672	+	0.960758	0.994273	SLC38A10	ENSG00000157637	solute carrier family 38, member 10 [Source:HGNC Symbol;Acc:28237]	79218800	79269347	0		-	0.569673	intron	opposite
1839	D2	P	17	79227158	79227659	501	+	0.97351	0.943556	SLC38A10	ENSG00000157637	solute carrier family 38, member 10 [Source:HGNC Symbol;Acc:28237]	79218800	79269347	0		-	0.569673	intron	opposite
1840	D2	P	17	79227163	79227664	501	+	0.958533	0.958533	SLC38A10	ENSG00000157637	solute carrier family 38, member 10 [Source:HGNC Symbol;Acc:28237]	79218800	79269347	0		-	0.569673	intron	opposite
1841	D2	P	17	79227163	79227776	613	+	1.0041	1.0041	SLC38A10	ENSG00000157637	solute carrier family 38, member 10 [Source:HGNC Symbol;Acc:28237]	79218800	79269347	0		-	0.569673	intron	opposite
1842	D2	P	17	79251464	79251965	501	+	0.269587	0.209679	SLC38A10	ENSG00000157637	solute carrier family 38, member 10 [Source:HGNC Symbol;Acc:28237]	79218800	79269347	0		-	0.569673	intron	opposite
1843	D2	P	17	79527993	79528494	501	+	0.97351	0.883648	NPLOC4	ENSG00000182446	nuclear protein localization 4 homolog (S. cerevisiae) [Source:HGNC Symbol;Acc:18261]	79523915	79616376	0		-	0.431373	intron	opposite
1844	D2	P	17	80082206	80082828	622	+	2.06366	2.00332	CCDC57	ENSG00000176155	coiled-coil domain containing 57 [Source:HGNC Symbol;Acc:27564]	80059346	80170689	0		-	0.805707	intron	opposite
1859	D2	P	17	81004471	81004972	501	+	0.0449312	0.0149771	B3GNTL1	ENSG00000175711	UDP-GlcNAc:betaGal beta-1,3-N-acetylglucosaminyltransferase-like 1 [Source:HGNC Symbol;Acc:21727]	80901672	81009686	0		-	0.196985	intron	opposite
1899	D2	P	19	630607	631253	646	+	0.313755	0.302134	POLRMT	ENSG00000099821	polymerase (RNA) mitochondrial (DNA directed) [Source:HGNC Symbol;Acc:9200]	617223	633568	0		-	0.846785	intron	opposite
1900	D2	P	19	630635	631136	501	+	0.344473	0.314519	POLRMT	ENSG00000099821	polymerase (RNA) mitochondrial (DNA directed) [Source:HGNC Symbol;Acc:9200]	617223	633568	0		-	0.846785	intron	opposite
1966	D2	P	19	11152465	11152966	501	-	0.61406	0.644014	SMARCA4	ENSG00000127616	SWI/SNF related, matrix associated, actin dependent regulator of chromatin, subfamily a, member 4 [Source:HGNC Symbol;Acc:11100]	11071598	11172958	0		+	0.500016	intron	opposite
1967	D2	P	19	11152466	11152967	501	-	0.61406	0.644014	SMARCA4	ENSG00000127616	SWI/SNF related, matrix associated, actin dependent regulator of chromatin, subfamily a, member 4 [Source:HGNC Symbol;Acc:11100]	11071598	11172958	0		+	0.500016	intron	opposite
1968	D2	P	19	11152467	11152968	501	-	0.61406	0.629037	SMARCA4	ENSG00000127616	SWI/SNF related, matrix associated, actin dependent regulator of chromatin, subfamily a, member 4 [Source:HGNC Symbol;Acc:11100]	11071598	11172958	0		+	0.500016	intron	opposite
2018	D2	P	19	43987453	43988067	614	+	0.158928	0.171153	PHLDB3	ENSG00000176531	pleckstrin homology-like domain, family B, member 3 [Source:HGNC Symbol;Acc:30499]	43979255	44009087	0		-	0.589725	intron	opposite
2041	D2	P	19	49483360	49483980	620	+	0.593247	0.617461	GYS1	ENSG00000104812	glycogen synthase 1 (muscle) [Source:HGNC Symbol;Acc:4706]	49471382	49496567	0		-	0.587784	intron	opposite
2086	D2	P	20	2969374	2969875	501	-	0.164748	0.179725	PTPRA	ENSG00000132670	protein tyrosine phosphatase, receptor type, A [Source:HGNC Symbol;Acc:9664]	2844830	3019320	0		+	0.405072	intron	opposite
2127	D2	P	21	34972066	34972567	501	+	0.0748854	0.0748854	AP000304.12	ENSG00000249209	No description	34956993	35284635	0		-	0.0916053	intron	opposite
2128	D2	P	21	34972066	34972679	613	+	0.0612255	0.0612255	AP000304.12	ENSG00000249209	No description	34956993	35284635	0		-	0.0916053	intron	opposite
2129	D2	P	21	34997299	34997928	629	+	0.119341	0.107407	AP000304.12	ENSG00000249209	No description	34956993	35284635	0		-	0.0916053	intron	opposite
2150	D2	P	22	31930874	31931375	501	-	0.913602	1.15324	SFI1	ENSG00000198089	Sfi1 homolog, spindle assembly associated (yeast) [Source:HGNC Symbol;Acc:29064]	31884674	32014572	0		+	1.43437	intron	opposite
2195	D2	P	X	30689095	30689596	501	-	0.0599083	0.0599083	GK	ENSG00000198814	glycerol kinase [Source:HGNC Symbol;Acc:4289]	30671476	30748725	0		+	0.0261809	intron	opposite
2196	D2	P	X	30689096	30689597	501	-	0.0599083	0.0449312	GK	ENSG00000198814	glycerol kinase [Source:HGNC Symbol;Acc:4289]	30671476	30748725	0		+	0.0261809	intron	opposite
10	D2	P	1	8737711	8738413	702	+	0.0213897	0.0213897	RERE	ENSG00000142599	arginine-glutamic acid dipeptide (RE) repeats [Source:HGNC Symbol;Acc:9965]	8412457	8877702	0		-	0.266919	utr	opposite
850	D2	P	7	100276917	100277418	501	+	3.56454	2.03688	GIGYF1	ENSG00000146830	GRB10 interacting GYF protein 1 [Source:HGNC Symbol;Acc:9126]	100277130	100287071	0		-	3.72219	utr	opposite
1559	D2	P	16	397154	397767	613	+	0.55103	0.514294	AXIN1	ENSG00000103126	axin 1 [Source:HGNC Symbol;Acc:903]	337440	402673	0		-	0.542271	utr	opposite
1678	D2	P	16	89414070	89414699	629	+	0.429628	0.501233	ANKRD11	ENSG00000167522	ankyrin repeat domain 11 [Source:HGNC Symbol;Acc:21316]	89334035	89556969	0		-	1.19403	utr	opposite
1682	D2	P	16	89475541	89476201	660	+	0.989575	1.0692	ANKRD11	ENSG00000167522	ankyrin repeat domain 11 [Source:HGNC Symbol;Acc:21316]	89334035	89556969	0		-	1.19403	utr	opposite
1683	D2	P	16	89475583	89476084	501	+	1.16821	1.0484	ANKRD11	ENSG00000167522	ankyrin repeat domain 11 [Source:HGNC Symbol;Acc:21316]	89334035	89556969	0		-	1.19403	utr	opposite
1684	D2	P	16	89475584	89476085	501	+	1.16821	1.0484	ANKRD11	ENSG00000167522	ankyrin repeat domain 11 [Source:HGNC Symbol;Acc:21316]	89334035	89556969	0		-	1.19403	utr	opposite
1685	D2	P	16	89475584	89476201	617	+	1.00977	1.0341	ANKRD11	ENSG00000167522	ankyrin repeat domain 11 [Source:HGNC Symbol;Acc:21316]	89334035	89556969	0		-	1.19403	utr	opposite
1686	D2	P	16	89475588	89476089	501	+	1.18319	1.0484	ANKRD11	ENSG00000167522	ankyrin repeat domain 11 [Source:HGNC Symbol;Acc:21316]	89334035	89556969	0		-	1.19403	utr	opposite
1687	D2	P	16	89511452	89512171	719	+	0.741407	0.866715	ANKRD11	ENSG00000167522	ankyrin repeat domain 11 [Source:HGNC Symbol;Acc:21316]	89334035	89556969	0		-	1.19403	utr	opposite
1765	D2	P	17	40508173	40508674	501	+	0.629037	0.644014	STAT3	ENSG00000168610	signal transducer and activator of transcription 3 (acute-phase response factor) [Source:HGNC Symbol;Acc:11364]	40465342	40540449	0		-	1.69744	utr	opposite
1975	D2	P	19	15398413	15398914	501	-	0.763831	0.793785	AC020911.1	ENSG00000246896	No description	15050246	16748905	0		+	0.342609	utr	opposite
2003	D2	P	19	37070954	37071455	501	-	1.03342	1.15324	AC092295.7	ENSG00000233527	No description	37063972	37085608	0		+	0.548328	utr	opposite
2004	D2	P	19	38140958	38141577	619	+	0.060633	0.060633	ZFP30	ENSG00000120784	zinc finger protein 30 homolog (mouse) [Source:HGNC Symbol;Acc:29555]	38123389	38147162	0		-	0.269128	utr	opposite
2011	D2	P	19	42047722	42048223	501	-	0	0	CEACAM21	ENSG00000007129	carcinoembryonic antigen-related cell adhesion molecule 21 [Source:HGNC Symbol;Acc:28834]	42041702	42093197	0		+	0.724606	utr	opposite
2022	D2	P	19	45929896	45930397	501	+	0.0299542	0.0149771	ERCC1	ENSG00000012061	excision repair cross-complementing rodent repair deficiency, complementation group 1 (includes overlapping antisense sequence) [Source:HGNC Symbol;Acc:3433]	45910591	45982086	0		-	0.359751	utr	opposite
2166	D2	P	22	43339059	43339694	635	+	0.118215	0.130037	PACSIN2	ENSG00000100266	protein kinase C and casein kinase substrate in neurons 2 [Source:HGNC Symbol;Acc:8571]	43231418	43411151	0		-	0.226182	utr	opposite
349	D2	P	3	49968468	49969089	621	+	0	0	MON1A	ENSG00000164077	MON1 homolog A (yeast) [Source:HGNC Symbol;Acc:28207]	49946302	49967606	862		-	0.0582282	NA	opposite
1052	D2	P	9	139822484	139822985	501	-	0.209679	0.194702	TRAF2	ENSG00000127191	TNF receptor-associated factor 2 [Source:HGNC Symbol;Acc:12032]	139776364	139821059	1425		+	0.204212	NA	opposite
4	D2	P	1	1336953	1337567	614	+	4.71892	4.00986	RP4-758J18.2	ENSG00000224870	No description	1334902	1337426	0		+	2.57267	exon	same
36	D2	P	1	32384304	32384805	501	-	4.13367	4.44819	PTP4A2	ENSG00000184007	protein tyrosine phosphatase type IVA, member 2 [Source:HGNC Symbol;Acc:9635]	32372022	32410457	0		-	1.02891	exon	same
495	D2	P	4	110402764	110403385	621	+	1.60765	1.30546	SEC24B	ENSG00000138802	SEC24 family, member B (S. cerevisiae) [Source:HGNC Symbol;Acc:10704]	110354928	110461612	0		+	0.669994	exon	same
647	D2	P	5	176857842	176858343	501	+	3.0703	2.74081	GRK6	ENSG00000198055	G protein-coupled receptor kinase 6 [Source:HGNC Symbol;Acc:4545]	176830205	176869902	0		+	0.77291	exon	same
648	D2	P	5	176857927	176858459	532	+	3.04689	2.5814	GRK6	ENSG00000198055	G protein-coupled receptor kinase 6 [Source:HGNC Symbol;Acc:4545]	176830205	176869902	0		+	0.77291	exon	same
842	D2	P	7	86526683	86527184	501	-	0.25461	0.194702	KIAA1324L	ENSG00000164659	KIAA1324-like [Source:HGNC Symbol;Acc:21945]	86506222	86689015	0		-	0.0468893	exon	same
1130	D2	P	10	106139604	106140105	501	+	0	0	CCDC147	ENSG00000120051	coiled-coil domain containing 147 [Source:HGNC Symbol;Acc:26676]	106113522	106214848	0		+	0.00140981	exon	same
1323	D2	P	12	50149265	50149885	620	+	2.62724	2.31245	TMBIM6	ENSG00000139644	transmembrane BAX inhibitor motif containing 6 [Source:HGNC Symbol;Acc:11723]	50101508	50158717	0		+	0.717549	exon	same
1563	D2	P	16	1877558	1878184	626	+	0.98328	1.07921	FAHD1	ENSG00000180185	fumarylacetoacetate hydrolase domain containing 1 [Source:HGNC Symbol;Acc:14169]	1876968	1890208	0		+	0.202711	exon	same
1589	D2	P	16	11859213	11859714	501	-	2.56108	2.78574	ZC3H7A	ENSG00000122299	zinc finger CCCH-type containing 7A [Source:HGNC Symbol;Acc:30959]	11844442	11891099	0		-	1.03339	exon	same
1594	D2	P	16	15178528	15179029	501	+	0.748854	0.61406	PDXDC1	ENSG00000179889	pyridoxal-dependent decarboxylase domain containing 1 [Source:HGNC Symbol;Acc:28995]	15068599	15233195	0		+	0.551838	exon	same
1642	D2	P	16	50067915	50068416	501	+	0.868671	0.763831	TMEM188	ENSG00000205423	transmembrane protein 188 [Source:HGNC Symbol;Acc:26759]	50059152	50070988	0		+	0.934969	exon	same
1694	D2	P	16	89615680	89616288	608	+	2.50616	2.38271	SPG7	ENSG00000197912	spastic paraplegia 7 (pure and complicated autosomal recessive) [Source:HGNC Symbol;Acc:11237]	89574811	89624174	0		+	1.66837	exon	same
1871	D2	P	18	23865676	23866298	622	+	2.22055	2.34123	TAF4B	ENSG00000141384	TAF4b RNA polymerase II, TATA box binding protein (TBP)-associated factor, 105kDa [Source:HGNC Symbol;Acc:11538]	23806409	23971642	0		+	0.201392	exon	same
1890	D2	P	18	57569776	57570392	616	+	1.94969	1.63287	PMAIP1	ENSG00000141682	phorbol-12-myristate-13-acetate-induced protein 1 [Source:HGNC Symbol;Acc:9108]	57567180	57571538	0		+	0.941752	exon	same
2107	D2	P	20	60968066	60968567	501	-	0.449312	0.404381	CABLES2	ENSG00000149679	Cdk5 and Abl enzyme substrate 2 [Source:HGNC Symbol;Acc:16143]	60963686	60982341	0		-	0.382453	exon	same
2108	D2	P	20	61572376	61572998	622	+	3.31876	2.86017	C20orf11	ENSG00000101193	chromosome 20 open reading frame 11 [Source:HGNC Symbol;Acc:15857]	61569471	61578019	0		+	2.30682	exon	same
2169	D2	P	22	46114098	46114720	622	+	0.748229	0.699956	ATXN10	ENSG00000130638	ataxin 10 [Source:HGNC Symbol;Acc:10549]	46067678	46241187	0		+	0.186543	exon	same
2241	D2	P	X	153689848	153690469	621	+	1.01536	0.979097	PLXNA3	ENSG00000130827	plexin A3 [Source:HGNC Symbol;Acc:9101]	153686621	153701989	0		+	1.33453	exon	same
2242	D2	P	X	153689849	153690350	501	+	1.0484	1.01844	PLXNA3	ENSG00000130827	plexin A3 [Source:HGNC Symbol;Acc:9101]	153686621	153701989	0		+	1.33453	exon	same
2243	D2	P	X	153689849	153690469	620	+	1.01699	0.980673	PLXNA3	ENSG00000130827	plexin A3 [Source:HGNC Symbol;Acc:9101]	153686621	153701989	0		+	1.33453	exon	same
2244	D2	P	X	153689850	153690469	619	+	1.01863	0.982255	PLXNA3	ENSG00000130827	plexin A3 [Source:HGNC Symbol;Acc:9101]	153686621	153701989	0		+	1.33453	exon	same
2245	D2	P	X	153689853	153690469	616	+	1.02359	0.987031	PLXNA3	ENSG00000130827	plexin A3 [Source:HGNC Symbol;Acc:9101]	153686621	153701989	0		+	1.33453	exon	same
2246	D2	P	X	153689854	153690355	501	+	1.0484	1.01844	PLXNA3	ENSG00000130827	plexin A3 [Source:HGNC Symbol;Acc:9101]	153686621	153701989	0		+	1.33453	exon	same
2247	D2	P	X	153689938	153690469	531	+	0.763155	0.862083	PLXNA3	ENSG00000130827	plexin A3 [Source:HGNC Symbol;Acc:9101]	153686621	153701989	0		+	1.33453	exon	same
8	D2	P	1	8578938	8579439	501	-	0.0299542	0.0299542	RERE	ENSG00000142599	arginine-glutamic acid dipeptide (RE) repeats [Source:HGNC Symbol;Acc:9965]	8412457	8877702	0		-	0.266919	intron	same
21	D2	P	1	24847848	24848349	501	+	2.63597	2.50117	RCAN3	ENSG00000117602	RCAN family member 3 [Source:HGNC Symbol;Acc:3042]	24829387	24863506	0		+	2.86395	intron	same
22	D2	P	1	24980038	24980657	619	+	0.145519	0.133393	SRRM1	ENSG00000133226	serine/arginine repetitive matrix 1 [Source:HGNC Symbol;Acc:16638]	24958207	24999758	0		+	1.13704	intron	same
26	D2	P	1	27025297	27025798	501	+	0.539175	0.494244	ARID1A	ENSG00000117713	AT rich interactive domain 1A (SWI-like) [Source:HGNC Symbol;Acc:11110]	27022524	27108595	0		+	1.15277	intron	same
52	D2	P	1	43149402	43149903	501	+	0.329496	0.269587	YBX1	ENSG00000065978	Y box binding protein 1 [Source:HGNC Symbol;Acc:8014]	43148098	43168023	0		+	2.13073	intron	same
104	D2	P	1	151650864	151651365	501	+	0.119817	0.134794	SNX27	ENSG00000143376	sorting nexin family member 27 [Source:HGNC Symbol;Acc:20073]	151584541	151671567	0		+	0.201727	intron	same
107	D2	P	1	154221019	154221641	622	+	0.518933	0.422387	UBAP2L	ENSG00000143569	ubiquitin associated protein 2-like [Source:HGNC Symbol;Acc:29877]	154192655	154243986	0		+	1.39613	intron	same
176	D2	P	2	1936394	1936895	501	-	0	0.0149771	MYT1L	ENSG00000186487	myelin transcription factor 1-like [Source:HGNC Symbol;Acc:7623]	1792885	2335032	0		-	0.0010401	intron	same
177	D2	P	2	1936395	1936896	501	-	0	0.0149771	MYT1L	ENSG00000186487	myelin transcription factor 1-like [Source:HGNC Symbol;Acc:7623]	1792885	2335032	0		-	0.0010401	intron	same
178	D2	P	2	1936396	1936897	501	-	0	0.0149771	MYT1L	ENSG00000186487	myelin transcription factor 1-like [Source:HGNC Symbol;Acc:7623]	1792885	2335032	0		-	0.0010401	intron	same
179	D2	P	2	1936398	1936899	501	-	0	0.0149771	MYT1L	ENSG00000186487	myelin transcription factor 1-like [Source:HGNC Symbol;Acc:7623]	1792885	2335032	0		-	0.0010401	intron	same
225	D2	P	2	85268022	85268523	501	+	0.149771	0.134794	KCMF1	ENSG00000176407	potassium channel modulatory factor 1 [Source:HGNC Symbol;Acc:20589]	85198216	85282560	0		+	0.544466	intron	same
270	D2	P	2	181849461	181850088	627	+	0.0359164	0.0359164	UBE2E3	ENSG00000170035	ubiquitin-conjugating enzyme E2E 3 [Source:HGNC Symbol;Acc:12479]	181831975	181941312	0		+	0.182499	intron	same
298	D2	P	2	217043523	217044245	722	+	0.0831922	0.0727932	XRCC5	ENSG00000079246	X-ray repair complementing defective repair in Chinese hamster cells 5 (double-strand-break rejoining) [Source:HGNC Symbol;Acc:12833]	216972187	217071026	0		+	0.674489	intron	same
301	D2	P	2	222346079	222346580	501	-	0	0.0149771	EPHA4	ENSG00000116106	EPH receptor A4 [Source:HGNC Symbol;Acc:3388]	222282747	222438922	0		-	0.0819363	intron	same
307	D2	P	2	228367783	228368403	620	+	0.0968566	0.0968566	AGFG1	ENSG00000173744	ArfGAP with FG repeats 1 [Source:HGNC Symbol;Acc:5175]	228336868	228421384	0		+	0.548695	intron	same
446	D2	P	4	24573501	24574002	501	-	0.0748854	0.0748854	DHX15	ENSG00000109606	DEAH (Asp-Glu-Ala-His) box polypeptide 15 [Source:HGNC Symbol;Acc:2738]	24519064	24586173	0		-	1.15136	intron	same
476	D2	P	4	82069157	82069658	501	-	0.0149771	0.0149771	PRKG2	ENSG00000138669	protein kinase, cGMP-dependent, type II [Source:HGNC Symbol;Acc:9416]	82009837	82136218	0		-	0.0131473	intron	same
493	D2	P	4	110361241	110361742	501	+	0.224656	0.179725	SEC24B	ENSG00000138802	SEC24 family, member B (S. cerevisiae) [Source:HGNC Symbol;Acc:10704]	110354928	110461612	0		+	0.669994	intron	same
517	D2	P	4	146819822	146820323	501	-	0.0149771	0.0149771	ZNF827	ENSG00000151612	zinc finger protein 827 [Source:HGNC Symbol;Acc:27193]	146678779	146859787	0		-	0.14758	intron	same
553	D2	P	5	16557852	16558353	501	-	0.0748854	0.10484	FAM134B	ENSG00000154153	family with sequence similarity 134, member B [Source:HGNC Symbol;Acc:25964]	16473147	16617167	0		-	0.671398	intron	same
566	D2	P	5	39024479	39024980	501	-	0.419358	0.35945	RICTOR	ENSG00000164327	RPTOR independent companion of MTOR, complex 2 [Source:HGNC Symbol;Acc:28611]	38938021	39074510	0		-	1.07189	intron	same
617	D2	P	5	130706692	130707193	501	+	1.75232	1.75232	CDC42SE2	ENSG00000158985	CDC42 small effector 2 [Source:HGNC Symbol;Acc:18547]	130581186	130734140	0		+	1.60746	intron	same
646	D2	P	5	176857841	176858342	501	+	3.08528	2.74081	GRK6	ENSG00000198055	G protein-coupled receptor kinase 6 [Source:HGNC Symbol;Acc:4545]	176830205	176869902	0		+	0.77291	intron	same
655	D2	P	5	179280799	179281300	501	-	0.0898625	0.10484	C5orf45	ENSG00000161010	chromosome 5 open reading frame 45 [Source:HGNC Symbol;Acc:30817]	179261436	179289173	0		-	1.43821	intron	same
690	D2	P	6	32833461	32833962	501	+	0.224656	0.239633	PSMB9	ENSG00000240065	proteasome (prosome, macropain) subunit, beta type, 9 (large multifunctional peptidase 2) [Source:HGNC Symbol;Acc:9546]	32811913	32847364	0		+	1.85439	intron	same
698	D2	P	6	34835906	34836524	618	+	0.0485848	0.0121462	UHRF1BP1	ENSG00000065060	UHRF1 binding protein 1 [Source:HGNC Symbol;Acc:21216]	34759857	34850915	0		+	0.388727	intron	same
710	D2	P	6	43159206	43159707	501	+	0.0449312	0.0449312	CUL9	ENSG00000112659	cullin 9 [Source:HGNC Symbol;Acc:15982]	43149913	43192325	0		+	1.4864	intron	same
721	D2	P	6	73364633	73365134	501	+	0	0	KCNQ5	ENSG00000185760	potassium voltage-gated channel, KQT-like subfamily, member 5 [Source:HGNC Symbol;Acc:6299]	73331520	73908574	0		+	0.0278041	intron	same
730	D2	P	6	96038578	96039198	620	+	0.0121071	0.0242142	MANEA	ENSG00000172469	mannosidase, endo-alpha [Source:HGNC Symbol;Acc:21072]	96025419	96057333	0		+	0.110486	intron	same
778	D2	P	6	168235109	168235610	501	+	0	0	MLLT4	ENSG00000130396	myeloid/lymphoid or mixed-lineage leukemia (trithorax homolog, Drosophila); translocated to, 4 [Source:HGNC Symbol;Acc:7137]	168227602	168372703	0		+	0.0177208	intron	same
804	D2	P	7	27822207	27822708	501	+	0.284565	0.314519	TAX1BP1	ENSG00000106052	Tax1 (human T-cell leukemia virus type I) binding protein 1 [Source:HGNC Symbol;Acc:11575]	27778950	27880938	0		+	0.430886	intron	same
812	D2	P	7	36443275	36443985	710	+	0.0105745	0.0105745	ANLN	ENSG00000011426	anillin, actin binding protein [Source:HGNC Symbol;Acc:14082]	36429415	36493400	0		+	0.0145703	intron	same
833	D2	P	7	70190376	70190994	618	+	0.0242924	0.0364386	AUTS2	ENSG00000158321	autism susceptibility candidate 2 [Source:HGNC Symbol;Acc:14262]	69063905	70258054	0		+	0.00556576	intron	same
845	D2	P	7	92964976	92965477	501	+	0.374427	0.329496	CCDC132	ENSG00000004766	coiled-coil domain containing 132 [Source:HGNC Symbol;Acc:25956]	92861653	92988338	0		+	0.182078	intron	same
947	D2	P	8	100558829	100559330	501	+	0	0.0149771	VPS13B	ENSG00000132549	vacuolar protein sorting 13 homolog B (yeast) [Source:HGNC Symbol;Acc:2183]	100025494	100889808	0		+	0.137276	intron	same
984	D2	P	9	5698477	5699096	619	+	0.776103	0.64271	KIAA1432	ENSG00000107036	KIAA1432 [Source:HGNC Symbol;Acc:17686]	5629025	5776557	0		+	0.484796	intron	same
1022	D2	P	9	100770004	100770623	619	+	1.96451	1.90388	ANP32B	ENSG00000136938	acidic (leucine-rich) nuclear phosphoprotein 32 family, member B [Source:HGNC Symbol;Acc:16677]	100745638	100778225	0		+	1.10166	intron	same
1043	D2	P	9	131809310	131809811	501	+	0.0748854	0.0748854	FAM73B	ENSG00000148343	family with sequence similarity 73, member B [Source:HGNC Symbol;Acc:23621]	131798900	131834361	0		+	0.491452	intron	same
1046	D2	P	9	138788260	138788761	501	-	0.0299542	0.0299542	CAMSAP1	ENSG00000130559	calmodulin regulated spectrin-associated protein 1 [Source:HGNC Symbol;Acc:19946]	138700333	138799074	0		-	0.133783	intron	same
1049	D2	P	9	139712379	139712880	501	+	0.179725	0.134794	C9orf86	ENSG00000196642	chromosome 9 open reading frame 86 [Source:HGNC Symbol;Acc:24703]	139694818	139735639	0		+	0.968774	intron	same
1051	D2	P	9	139782769	139783270	501	+	0.179725	0.119817	TRAF2	ENSG00000127191	TNF receptor-associated factor 2 [Source:HGNC Symbol;Acc:12032]	139776364	139821059	0		+	0.204212	intron	same
1139	D2	P	10	124174353	124174854	501	+	0.0748854	0.0898625	PLEKHA1	ENSG00000107679	pleckstrin homology domain containing, family A (phosphoinositide binding specific) member 1 [Source:HGNC Symbol;Acc:14335]	124134173	124191867	0		+	0.723376	intron	same
1153	D2	P	11	3773045	3773546	501	-	0.808762	0.898625	NUP98	ENSG00000110713	nucleoporin 98kDa [Source:HGNC Symbol;Acc:8068]	3692313	3819022	0		-	0.660056	intron	same
1154	D2	P	11	3773046	3773547	501	-	0.808762	0.898625	NUP98	ENSG00000110713	nucleoporin 98kDa [Source:HGNC Symbol;Acc:8068]	3692313	3819022	0		-	0.660056	intron	same
1155	D2	P	11	3773047	3773548	501	-	0.808762	0.898625	NUP98	ENSG00000110713	nucleoporin 98kDa [Source:HGNC Symbol;Acc:8068]	3692313	3819022	0		-	0.660056	intron	same
1185	D2	P	11	60172384	60172885	501	+	0.0149771	0.0149771	MS4A14	ENSG00000166928	membrane-spanning 4-domains, subfamily A, member 14 [Source:HGNC Symbol;Acc:30706]	60146003	60185161	0		+	0.00691197	intron	same
1212	D2	P	11	65963967	65964580	613	+	0.771442	0.746951	PACS1	ENSG00000175115	phosphofurin acidic cluster sorting protein 1 [Source:HGNC Symbol;Acc:30032]	65837834	66012218	0		+	1.23126	intron	same
1218	D2	P	11	66895792	66896293	501	+	0.209679	0.209679	KDM2A	ENSG00000173120	lysine (K)-specific demethylase 2A [Source:HGNC Symbol;Acc:13606]	66886740	67025141	0		+	0.885583	intron	same
1219	D2	P	11	66895792	66896411	619	+	0.242532	0.242532	KDM2A	ENSG00000173120	lysine (K)-specific demethylase 2A [Source:HGNC Symbol;Acc:13606]	66886740	67025141	0		+	0.885583	intron	same
1342	D2	P	12	70706818	70707438	620	+	0.0605354	0.0363212	CNOT2	ENSG00000111596	CCR4-NOT transcription complex, subunit 2 [Source:HGNC Symbol;Acc:7878]	70636774	70748773	0		+	0.559994	intron	same
1375	D2	P	12	120489173	120489795	622	+	0.144818	0.144818	CCDC64	ENSG00000135127	coiled-coil domain containing 64 [Source:HGNC Symbol;Acc:28095]	120427648	120532298	0		+	0.354691	intron	same
1404	D2	P	13	42741241	42741899	658	+	0.125498	0.136907	DGKH	ENSG00000102780	diacylglycerol kinase, eta [Source:HGNC Symbol;Acc:2854]	42614176	42830714	0		+	0.0692688	intron	same
1411	D2	P	13	45798767	45799387	620	+	0.0605354	0.0726424	GTF2F2	ENSG00000188342	general transcription factor IIF, polypeptide 2, 30kDa [Source:HGNC Symbol;Acc:4653]	45694650	45858237	0		+	0.080246	intron	same
1429	D2	P	13	99727925	99728426	501	-	0.778808	0.599083	DOCK9	ENSG00000088387	dedicator of cytokinesis 9 [Source:HGNC Symbol;Acc:14132]	99445741	99738879	0		-	0.392905	intron	same
1454	D2	P	14	35259674	35260175	501	-	1.39287	1.2431	BAZ1A	ENSG00000198604	bromodomain adjacent to zinc finger domain, 1A [Source:HGNC Symbol;Acc:960]	35221937	35344853	0		-	0.634549	intron	same
1455	D2	P	14	35521334	35521835	501	+	0.61406	0.673969	FAM177A1	ENSG00000151327	family with sequence similarity 177, member A1 [Source:HGNC Symbol;Acc:19829]	35514113	35582336	0		+	0.747838	intron	same
1463	D2	P	14	45416501	45417002	501	-	0.269587	0.269587	KLHL28	ENSG00000179454	kelch-like 28 (Drosophila) [Source:HGNC Symbol;Acc:19741]	45397672	45511525	0		-	0.324436	intron	same
1469	D2	P	14	58779039	58779540	501	+	0.10484	0.0898625	ARID4A	ENSG00000032219	AT rich interactive domain 4A (RBP1-like) [Source:HGNC Symbol;Acc:9885]	58765103	58840605	0		+	0.60036	intron	same
1505	D2	P	15	26060410	26060911	501	-	0.0898625	0.0599083	ATP10A	ENSG00000206190	ATPase, class V, type 10A [Source:HGNC Symbol;Acc:13542]	25922420	26110317	0		-	0.774985	intron	same
1547	D2	P	15	99242286	99242908	622	+	0.374114	0.386183	IGF1R	ENSG00000140443	insulin-like growth factor 1 receptor [Source:HGNC Symbol;Acc:5465]	99192200	99507759	0		+	0.587784	intron	same
1558	D2	P	16	383086	383587	501	-	0.164748	0.224656	AXIN1	ENSG00000103126	axin 1 [Source:HGNC Symbol;Acc:903]	337440	402673	0		-	0.542271	intron	same
1592	D2	P	16	14694282	14694783	501	-	0.209679	0.149771	PARN	ENSG00000140694	poly(A)-specific ribonuclease [Source:HGNC Symbol;Acc:8609]	14529559	14724124	0		-	0.190275	intron	same
1596	D2	P	16	16132502	16133142	640	+	0.269774	0.293233	ABCC1	ENSG00000103222	ATP-binding cassette, sub-family C (CFTR/MRP), member 1 [Source:HGNC Symbol;Acc:51]	16043434	16236931	0		+	0.737481	intron	same
1597	D2	P	16	16132524	16133025	501	+	0.269587	0.299542	ABCC1	ENSG00000103222	ATP-binding cassette, sub-family C (CFTR/MRP), member 1 [Source:HGNC Symbol;Acc:51]	16043434	16236931	0		+	0.737481	intron	same
1598	D2	P	16	16132525	16133026	501	+	0.269587	0.299542	ABCC1	ENSG00000103222	ATP-binding cassette, sub-family C (CFTR/MRP), member 1 [Source:HGNC Symbol;Acc:51]	16043434	16236931	0		+	0.737481	intron	same
1599	D2	P	16	16132528	16133029	501	+	0.269587	0.299542	ABCC1	ENSG00000103222	ATP-binding cassette, sub-family C (CFTR/MRP), member 1 [Source:HGNC Symbol;Acc:51]	16043434	16236931	0		+	0.737481	intron	same
1628	D2	P	16	30729250	30729751	501	+	0.374427	0.389404	SRCAP	ENSG00000080603	Snf2-related CREBBP activator protein [Source:HGNC Symbol;Acc:16974]	30709530	30762702	0		+	1.54448	intron	same
1654	D2	P	16	67302588	67303210	622	+	0.168955	0.120682	SLC9A5	ENSG00000135740	solute carrier family 9 (sodium/hydrogen exchanger), member 5 [Source:HGNC Symbol;Acc:11078]	67282855	67306093	0		+	0.270147	intron	same
1661	D2	P	16	69605747	69606360	613	+	0.0244902	0.0122451	NFAT5	ENSG00000102908	nuclear factor of activated T-cells 5, tonicity-responsive [Source:HGNC Symbol;Acc:7774]	69598997	69738569	0		+	0.336458	intron	same
1711	D2	P	17	4206401	4206902	501	-	0.419358	0.449312	UBE2G1	ENSG00000132388	ubiquitin-conjugating enzyme E2G 1 [Source:HGNC Symbol;Acc:12482]	4172512	4269969	0		-	0.581526	intron	same
1737	D2	P	17	28584599	28585100	501	-	0.0449312	0.0898625	BLMH	ENSG00000108578	bleomycin hydrolase [Source:HGNC Symbol;Acc:1059]	28575223	28619074	0		-	0.401882	intron	same
1740	D2	P	17	29468746	29469247	501	+	0.0299542	0.0299542	NF1	ENSG00000196712	neurofibromin 1 [Source:HGNC Symbol;Acc:7765]	29421945	29708905	0		+	0.208241	intron	same
1741	D2	P	17	29623370	29623871	501	+	0.179725	0.149771	NF1	ENSG00000196712	neurofibromin 1 [Source:HGNC Symbol;Acc:7765]	29421945	29708905	0		+	0.208241	intron	same
1757	D2	P	17	38005266	38005864	598	-	0.050207	0.0251035	IKZF3	ENSG00000161405	IKAROS family zinc finger 3 (Aiolos) [Source:HGNC Symbol;Acc:13178]	37913968	38020441	0		-	0.420079	intron	same
1795	D2	P	17	61721103	61721604	501	+	0.299542	0.299542	MAP3K3	ENSG00000198909	mitogen-activated protein kinase kinase kinase 3 [Source:HGNC Symbol;Acc:6855]	61699801	61773667	0		+	1.03372	intron	same
1828	D2	P	17	76757226	76757727	501	-	0.629037	0.61406	CYTH1	ENSG00000108669	cytohesin 1 [Source:HGNC Symbol;Acc:9501]	76670130	76778379	0		-	1.9414	intron	same
1845	D2	P	17	80082323	80082824	501	-	1.99195	2.02191	CCDC57	ENSG00000176155	coiled-coil domain containing 57 [Source:HGNC Symbol;Acc:27564]	80059346	80170689	0		-	0.805707	intron	same
1846	D2	P	17	80082327	80082828	501	-	2.00693	2.09679	CCDC57	ENSG00000176155	coiled-coil domain containing 57 [Source:HGNC Symbol;Acc:27564]	80059346	80170689	0		-	0.805707	intron	same
1853	D2	P	17	80508411	80509024	613	+	0.0244902	0.0244902	FOXK2	ENSG00000141568	forkhead box K2 [Source:HGNC Symbol;Acc:6036]	80477589	80562483	0		+	0.415003	intron	same
1927	D2	P	19	4414229	4414849	620	+	0.121071	0.157392	CHAF1A	ENSG00000167670	chromatin assembly factor 1, subunit A (p150) [Source:HGNC Symbol;Acc:1910]	4402659	4443394	0		+	0.183643	intron	same
1953	D2	P	19	9768029	9768530	501	-	0.119817	0.149771	ZNF562	ENSG00000171466	zinc finger protein 562 [Source:HGNC Symbol;Acc:25950]	9759363	9785776	0		-	0.364625	intron	same
[truncated: 301 more rows]

## Sheet: RLIC 3 donors 
	donor	status	chromosome	start	end	size	strand	expression over integration site (same strand)	expression over integration site (opposite strand)	gene symbol	ensembl accession	description gene	start gene	end gene	distance to closest gene		gene strand	expression gene	integration utr/intron	direction integration and gene
[truncated: 162 more rows]

[truncated: 1 more sheets: NRLIC 3 donors ]
