# Supplementary figures and images for: Distinct chromatin functional states correlate with HIV latency reactivation in infected primary CD4+ T cells
Source: eLife journal article supplement (doi:10.7554/elife.34655), 2018-04-30

A

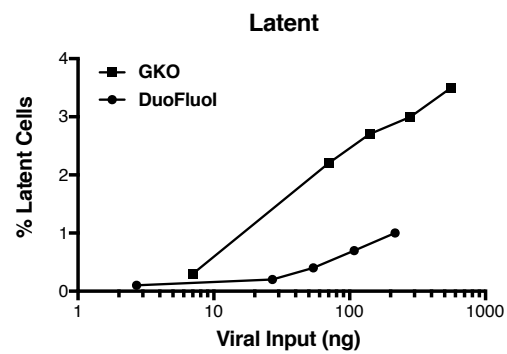

B

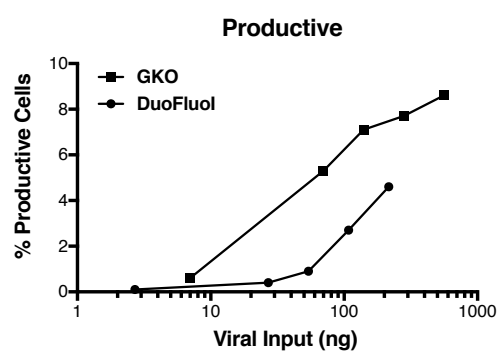

C

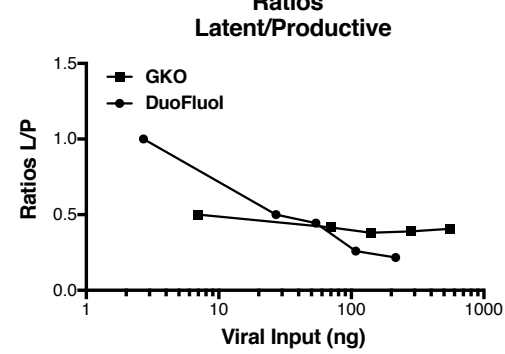

Supplement: supp [file elife-34655-supp-v1.zip › elife_poa_e34655_Figure_1_figure_supplement_1.pdf]

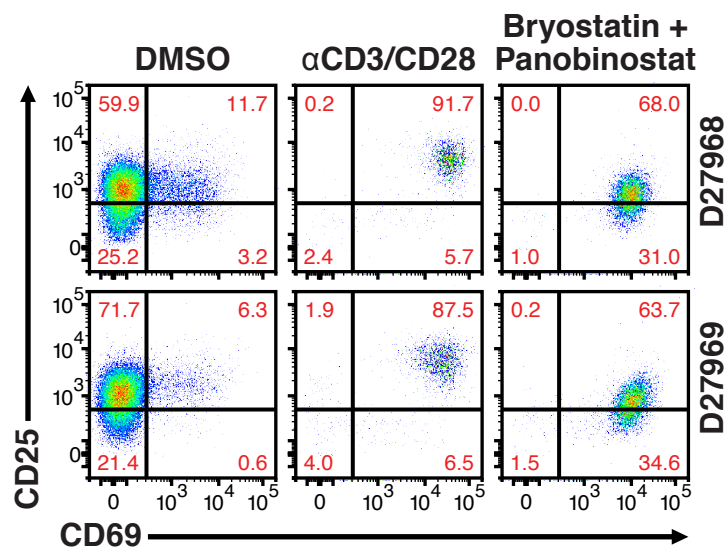

Supplement: supp [file elife-34655-supp-v1.zip › elife_poa_e34655_Figure_4_figure_supplement_1.pdf]
